# Supplementary material
Source: PubMed Central journal article supplement (PMC2535801)
Supplement: NIHMS63172-supplement-1si20051031_05.pdf [file NIHMS63172-supplement-1si20051031_05.pdf]

Evolution of a Strategy for the Synthesis of  
Structurally Complex Batzelladine Alkaloids.  
Enantioselective Total Synthesis of the Proposed  
Structure of Batzelladine F and Structural  
Revision

*Frederick Cohen and Larry E. Overman\**

**Supporting Information Part 2 (87 Pages)**

**F. Copies of  $^1\text{H}$  and  $^{13}\text{C}$  NMR spectra of new compounds:  
Pages 38–124**

Current Data Parameters  
NAME fc-ii-175  
EXPNO 1  
PROCNO 1

F2 - Acquisition Parameters

Date\_ 990512  
Time\_ 9.14  
INSTRUM spect  
PROBHD 5 mm broadband  
PULPROG zg  
TD 32768  
SOLVENT CDCl3  
NS 16  
DS 2  
SWH 6009.615 Hz  
SMH 0.183399 Hz  
FIDRES 2.7653677 sec  
AQ 286  
RG 63.200 usec  
DM 6.00 usec  
DE 300.0 K  
TE 1.00000000 sec  
P1 4.00 usec  
SFO1 500.0325001 MHz  
NUC1 1H  
PL1 0.00 dB

F2 - Processing parameters

SF 131072  
SF 500.0299950 MHz  
WDW EM  
SSB 0  
LB 0.30 Hz  
GB 0  
PC 1.00

1D NMR plot parameters

CX 25.00 cm  
F1P 10.000 ppm  
F1 5000.30 Hz  
F2P -0.500 ppm  
F2 -250.01 Hz  
PPMCK 0.42000 ppm/cm  
HZCM 210.01260 Hz/cm

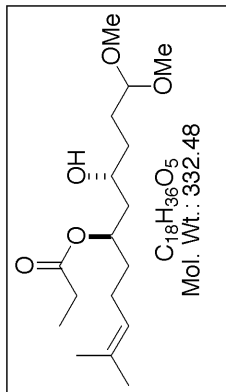

S39

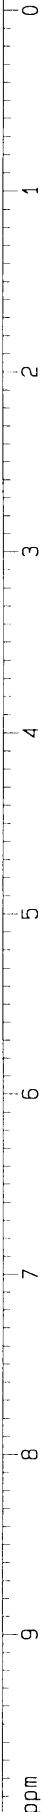

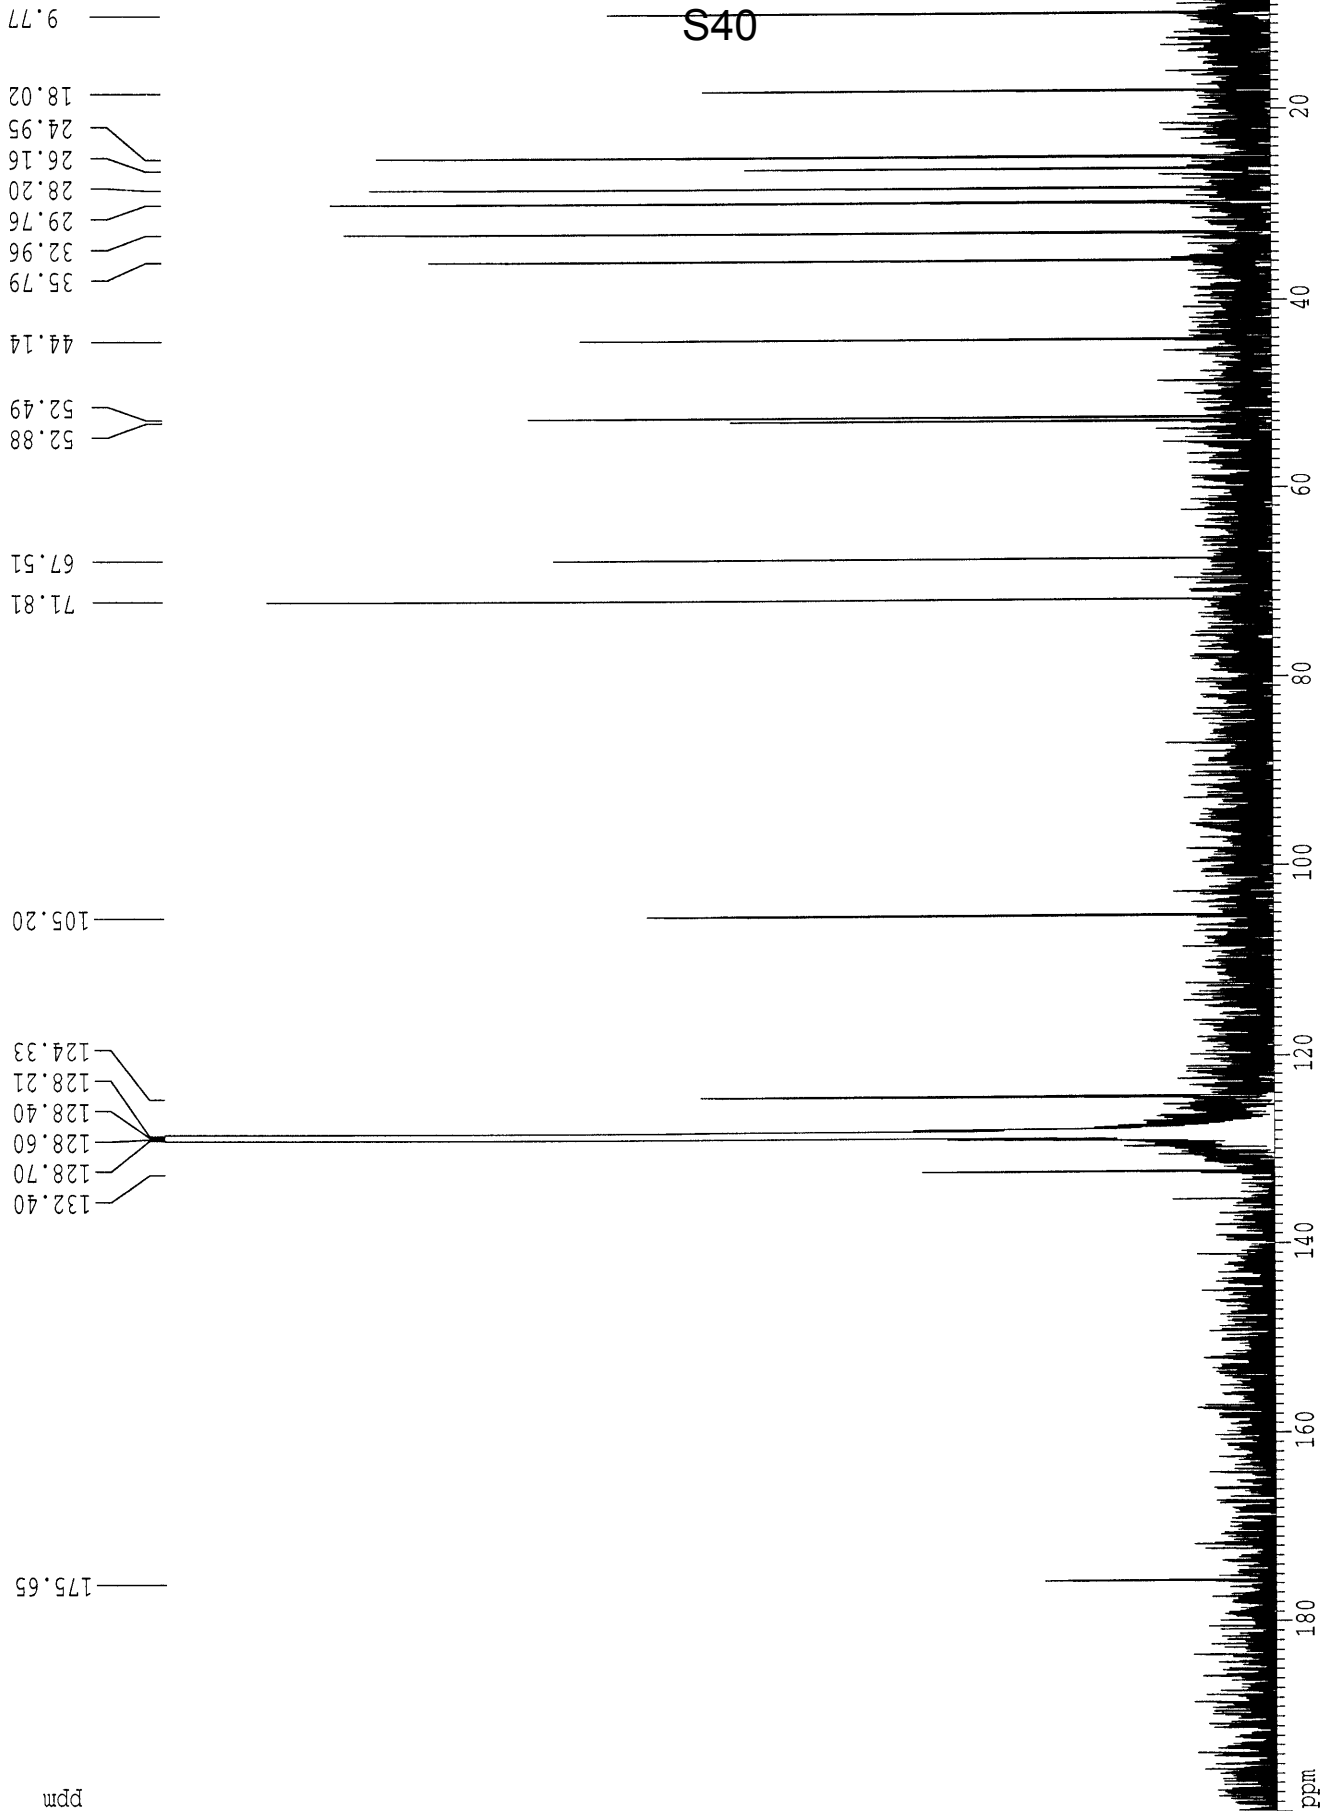

Current Data Parameters  
NAME fc-11-181  
EXPNO 1  
PROCNO 1

F2 - Acquisition Parameters

Date\_ 980519  
Time 7.09  
INSTRUM spect  
PROBHD 5 mm broadband  
PULPROG zg  
TD 32768  
SOLVENT CDCl3  
NS 16  
DS 2  
SWH 6009.615 Hz  
FIDRES 0.183395 Hz  
AQ 2.7263477 sec  
RG 256  
DM 83.200 usec  
DE 6.00 usec  
TE 300.0 K  
D1 1.00000000 sec  
P1 4.00 usec  
SF01 500.0325003 MHz  
NUC1 1H  
PC1 0.00 dB

F2 - Processing parameters

SI 131072  
SF 500.0300109 MHz  
WDW EM  
SSB 0  
LB 0.30 Hz  
GB 0  
PC 1.00

1D NMR plot parameters

CX 25.00 cm  
F1P 10.000 ppm  
F1 5000.30 Hz  
F2P -0.500 ppm  
F2 -250.01 Hz  
PRGCM 0.42000 ppm/cm  
HZCM 210.01260 Hz/cm

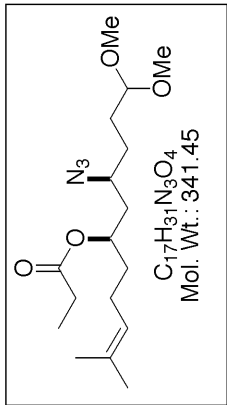

S41

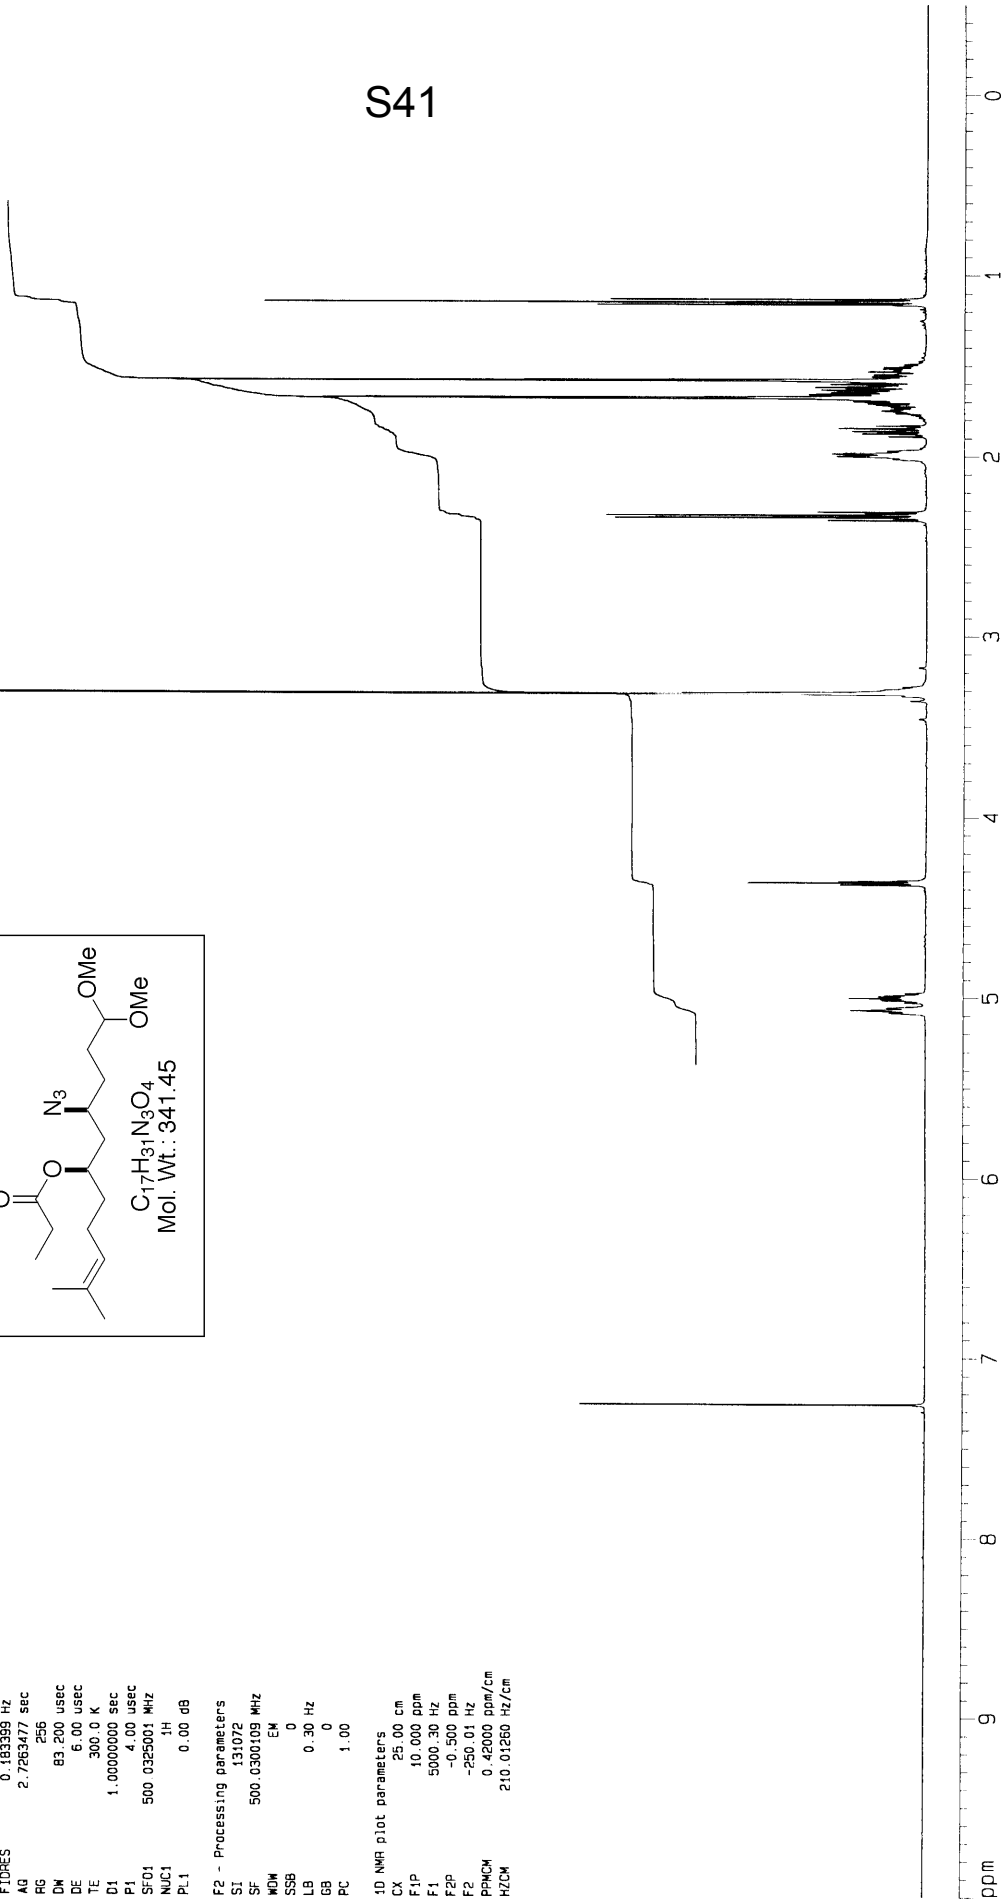

Current Data Parameters  
NAME fc-ii-181  
EXPNO 2  
PROCNO 1  
174.05

F2 - Acquisition Parameters

Date\_ 980519  
Time 7.39  
INSTRUM spect  
PROBHD 5 mm broadband  
PULPROG zgpg  
TD 32768  
SOLVENT   
NS 554  
DS 0  
SWH 31446.541 Hz  
FIDRES 0.959672 Hz  
AQ 0.5210612 sec  
RG 2896.3  
DM 15.900 usec  
DE 4.50 usec  
TE 300.0 K  
D11 0.03000000 sec  
PL12 15.00 dB  
CPDPRG2 waltz16  
PCPD2 79.50 usec  
SF02 500.0325001 MHz  
NUC2 1H  
PL2 120.00 dB  
D1 2.50000000 sec  
P1 6.00 usec  
SF01 125.7457959 MHz  
NUC1 13C  
PL1 0.00 dB

F2 - Processing parameters

SI 16384  
SF 125.7326462 MHz  
WDW EM  
SSB 0  
LB 1.00 Hz  
GB 0  
PC 1.00

1D NMR plot parameters

CX 25.00 cm  
F1P 200.000 ppm  
F1 25146.53 Hz  
F2P 0.000 ppm  
F2 0.00 Hz  
PPMCM 8.00000 ppm/cm  
HZCM 1005.86115 Hz/cm

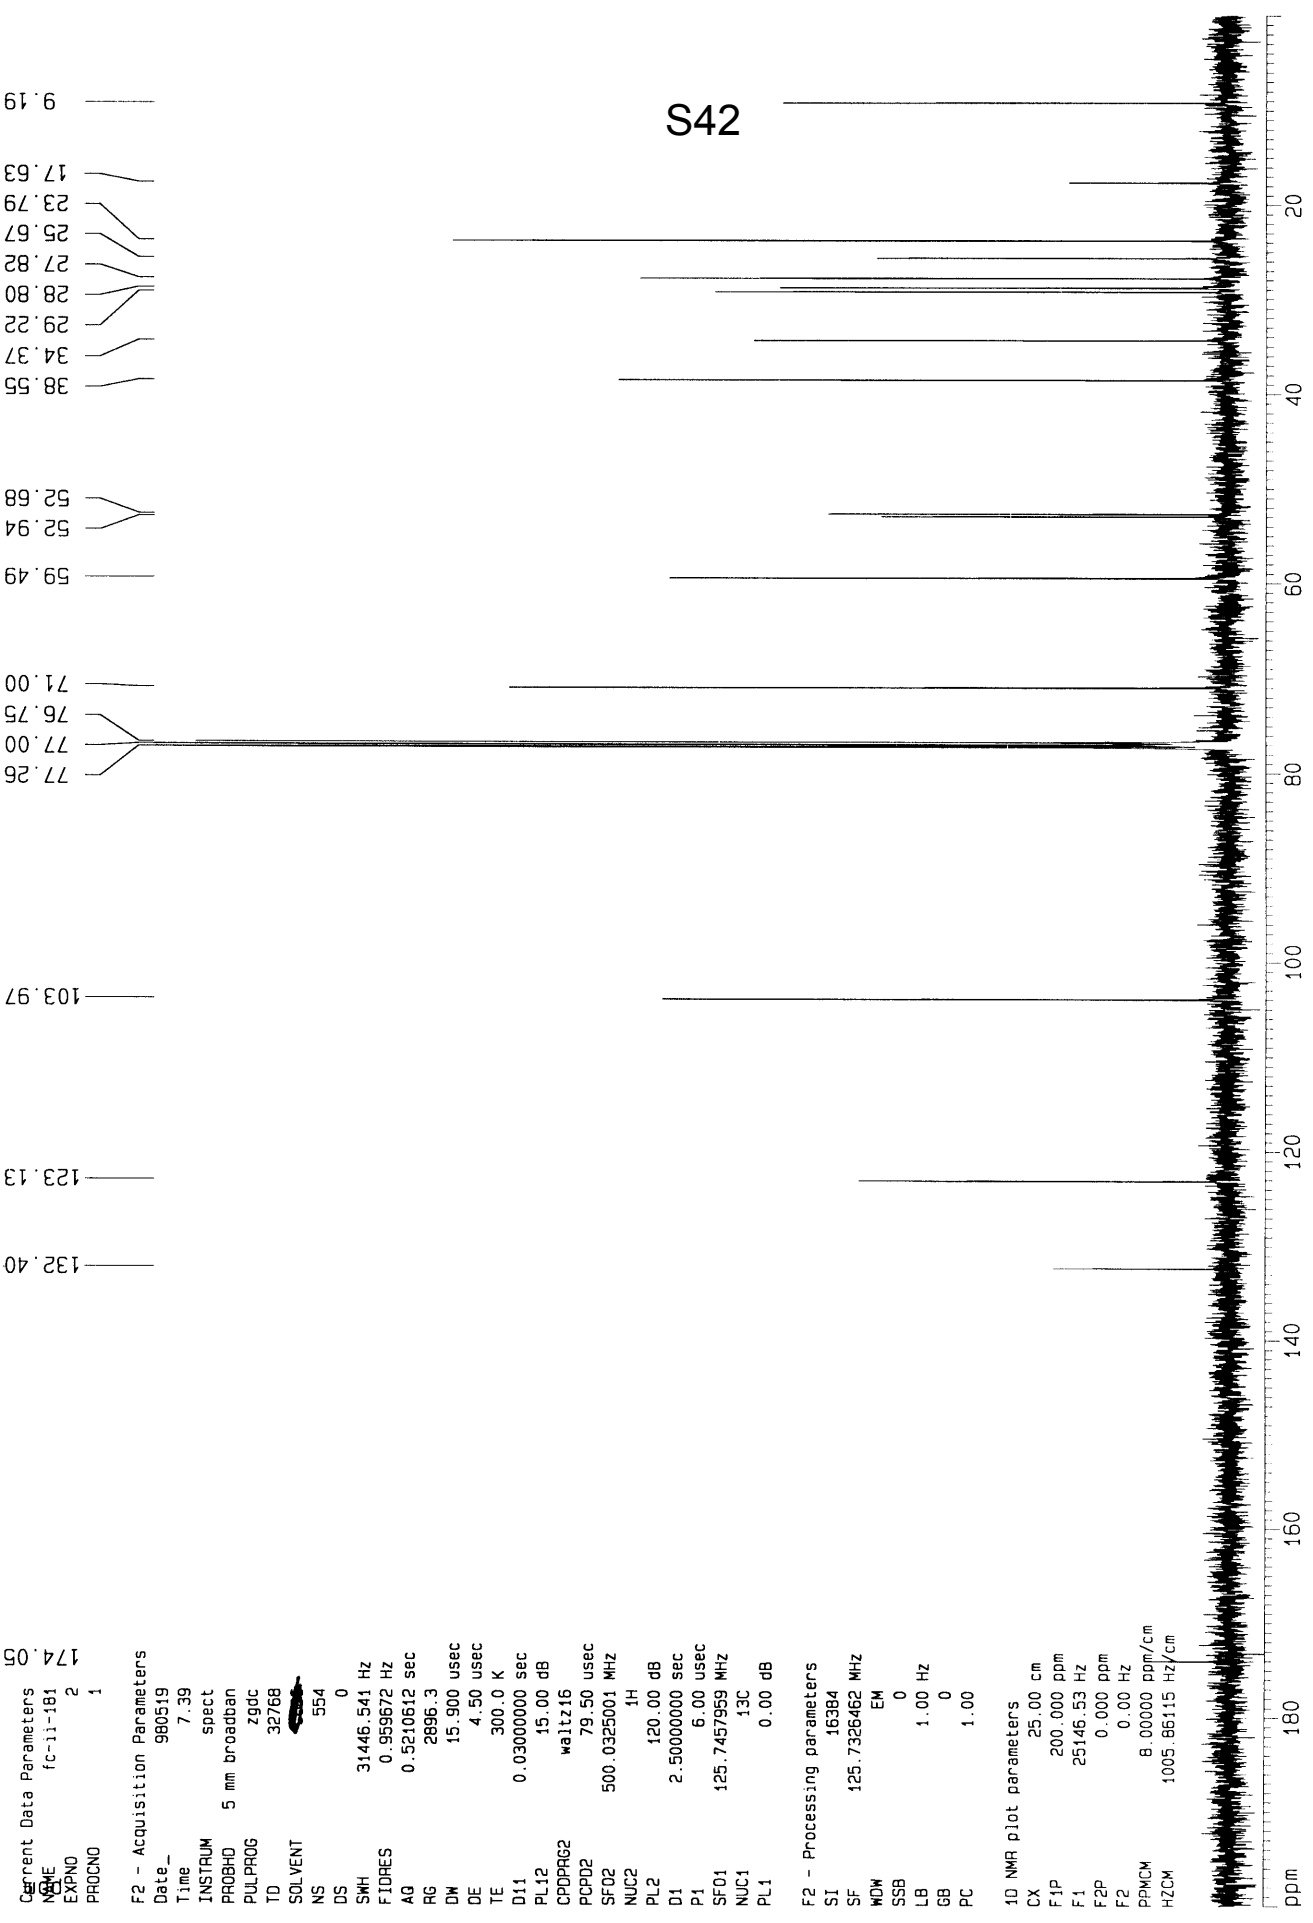

Current Data Parameters  
NAME fc-111-16a  
EXPNO 1  
PROCNO 1

F2 - Acquisition Parameters

Date\_ 980919  
Time 12.01  
INSTRUM spect  
PROBHD 5 mm QNP 1H  
PULPROG zg  
TD 16384  
SOLVENT CLC13  
NS 16  
DS 2  
SWH 4789.272 Hz  
FIDRES 0.292314 Hz  
AQ 1.7105395 sec  
RG 724.1  
DM 104.400 usec  
DE 4.50 usec  
TE 300.0 K  
D1 1.0000000 sec  
P1 4.00 usec  
SFO1 400.1320007 MHz  
NUC1 1H  
PL1 0.00 dB

F2 - Processing parameters

SI 32768  
SF 400.1300005 MHz  
WDW EM  
SSB 0  
LB 0.30 Hz  
RB 0  
PC 1.00

10 MHz plot parameters

EX 29.00 cm  
FIP 10.000 ppm  
F1 4001.30 Hz  
F2 -0.500 ppm  
F2 -200.07 Hz  
PPhCn 0.42000 ppm/cm  
HZCn 169.05460 Hz/cm

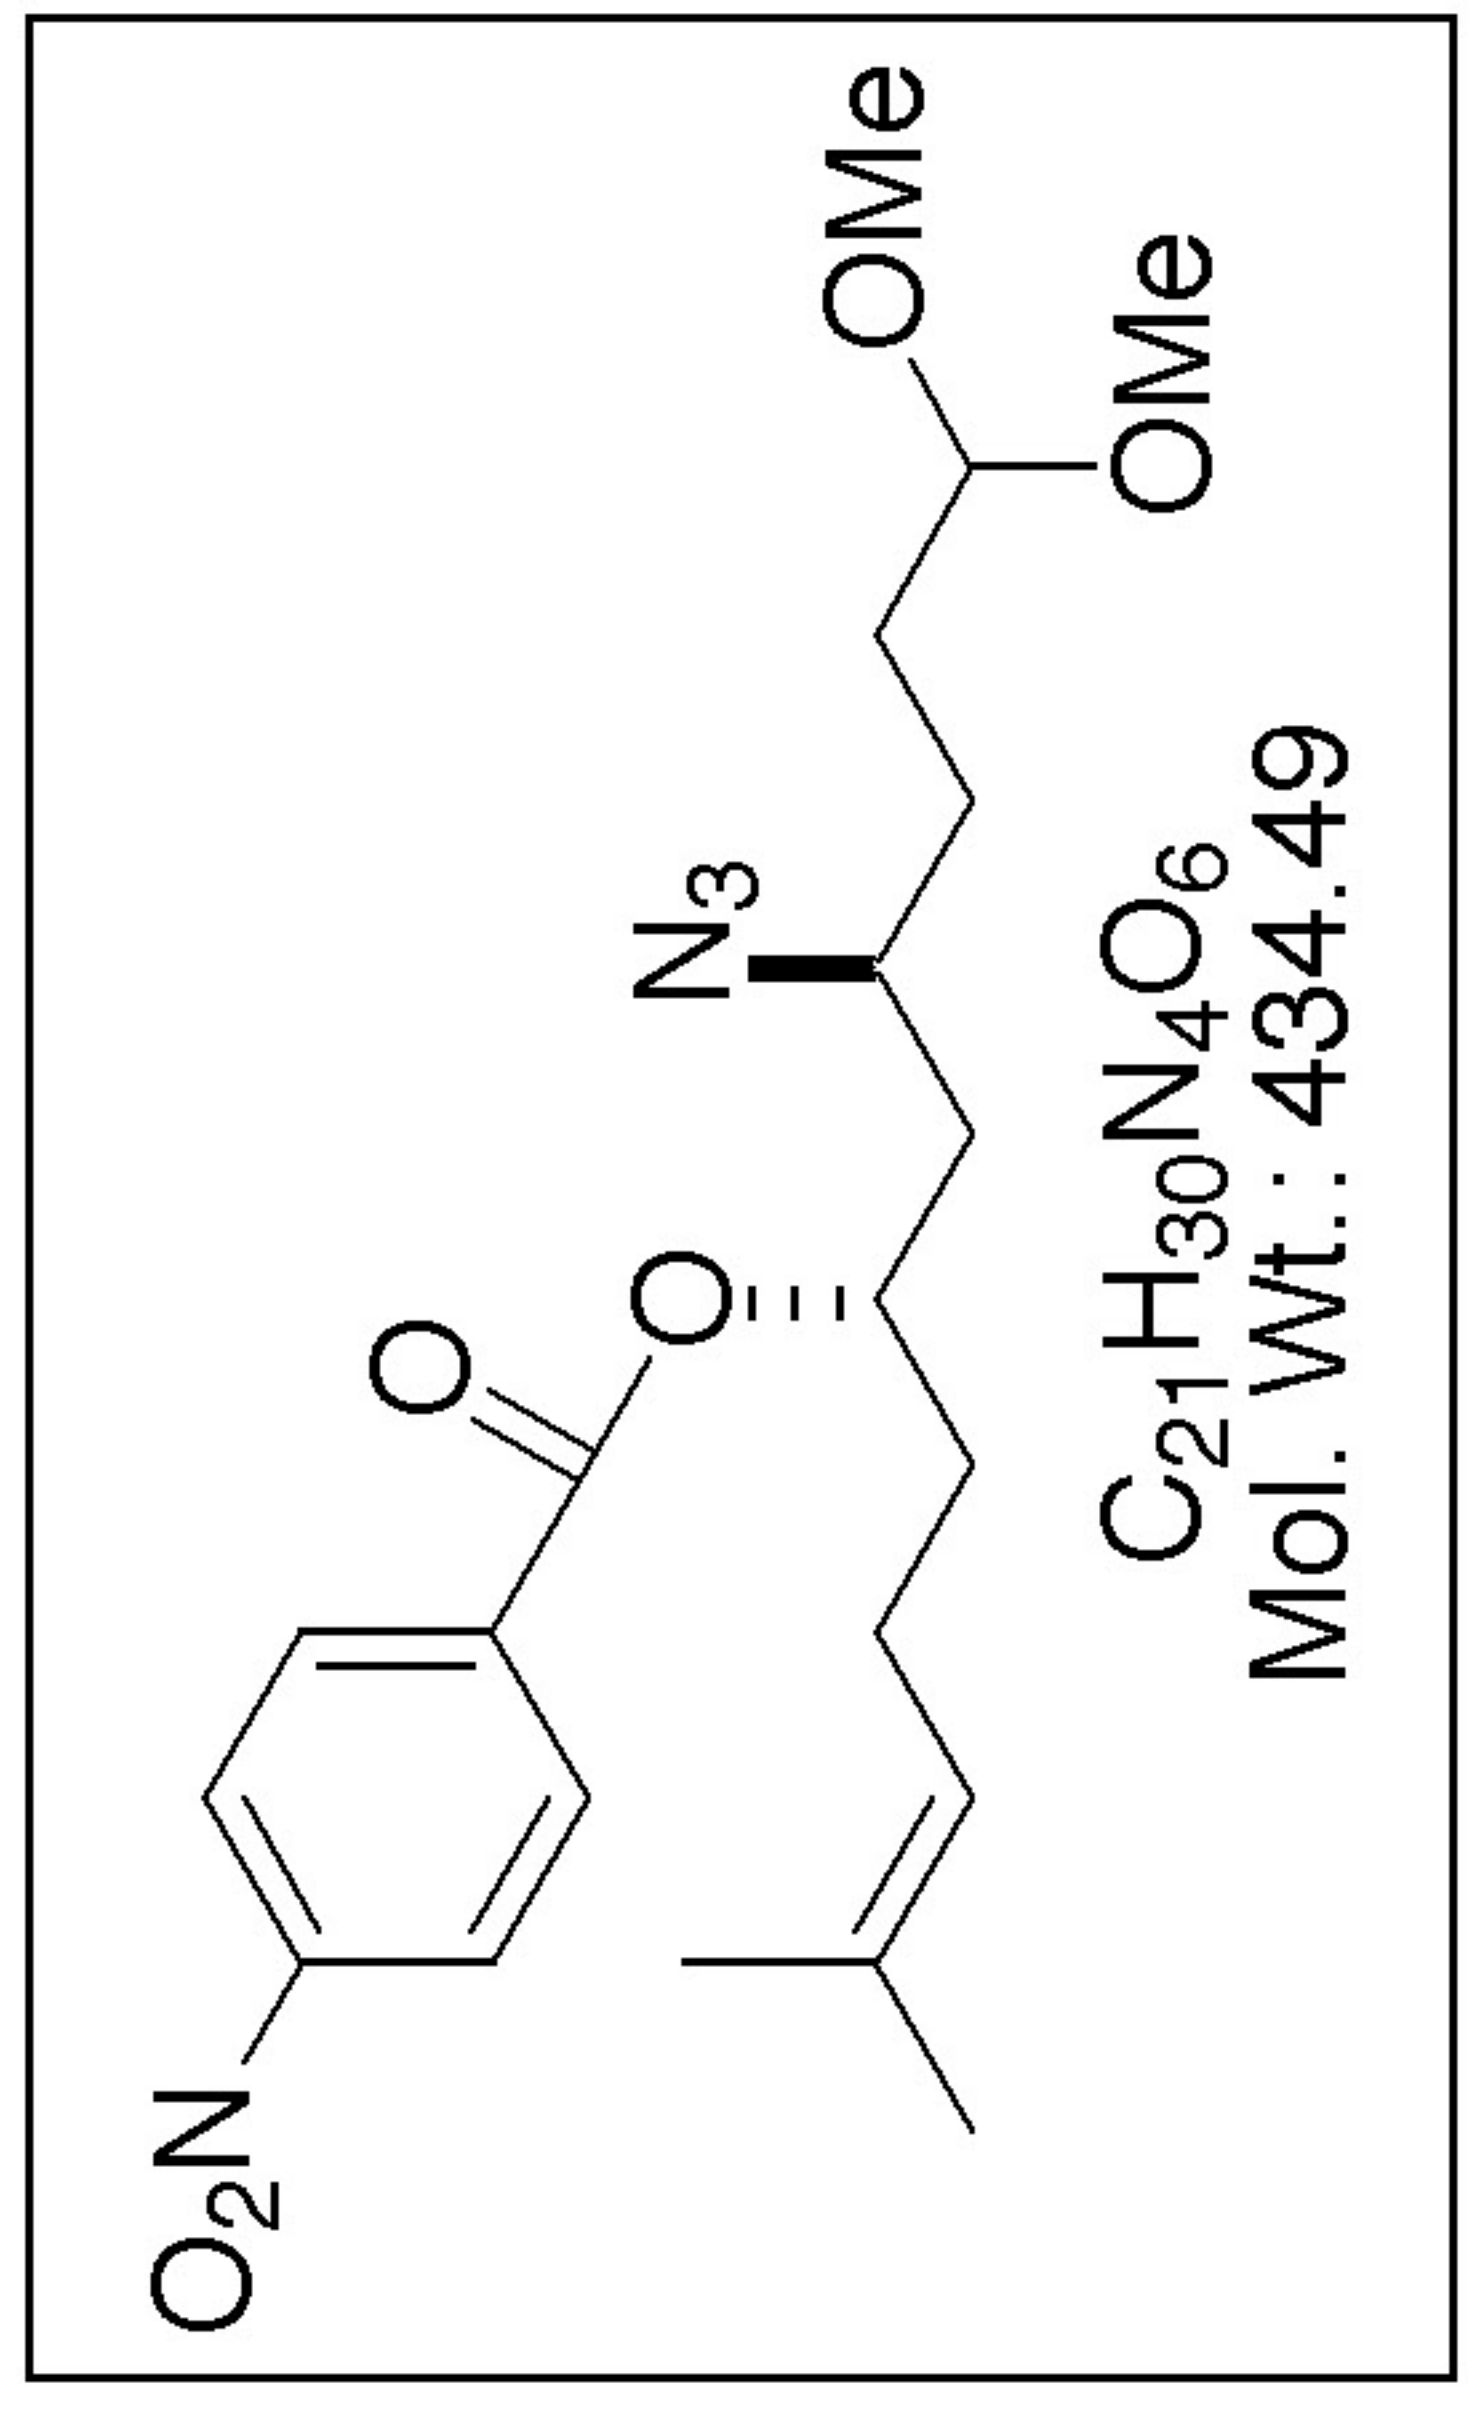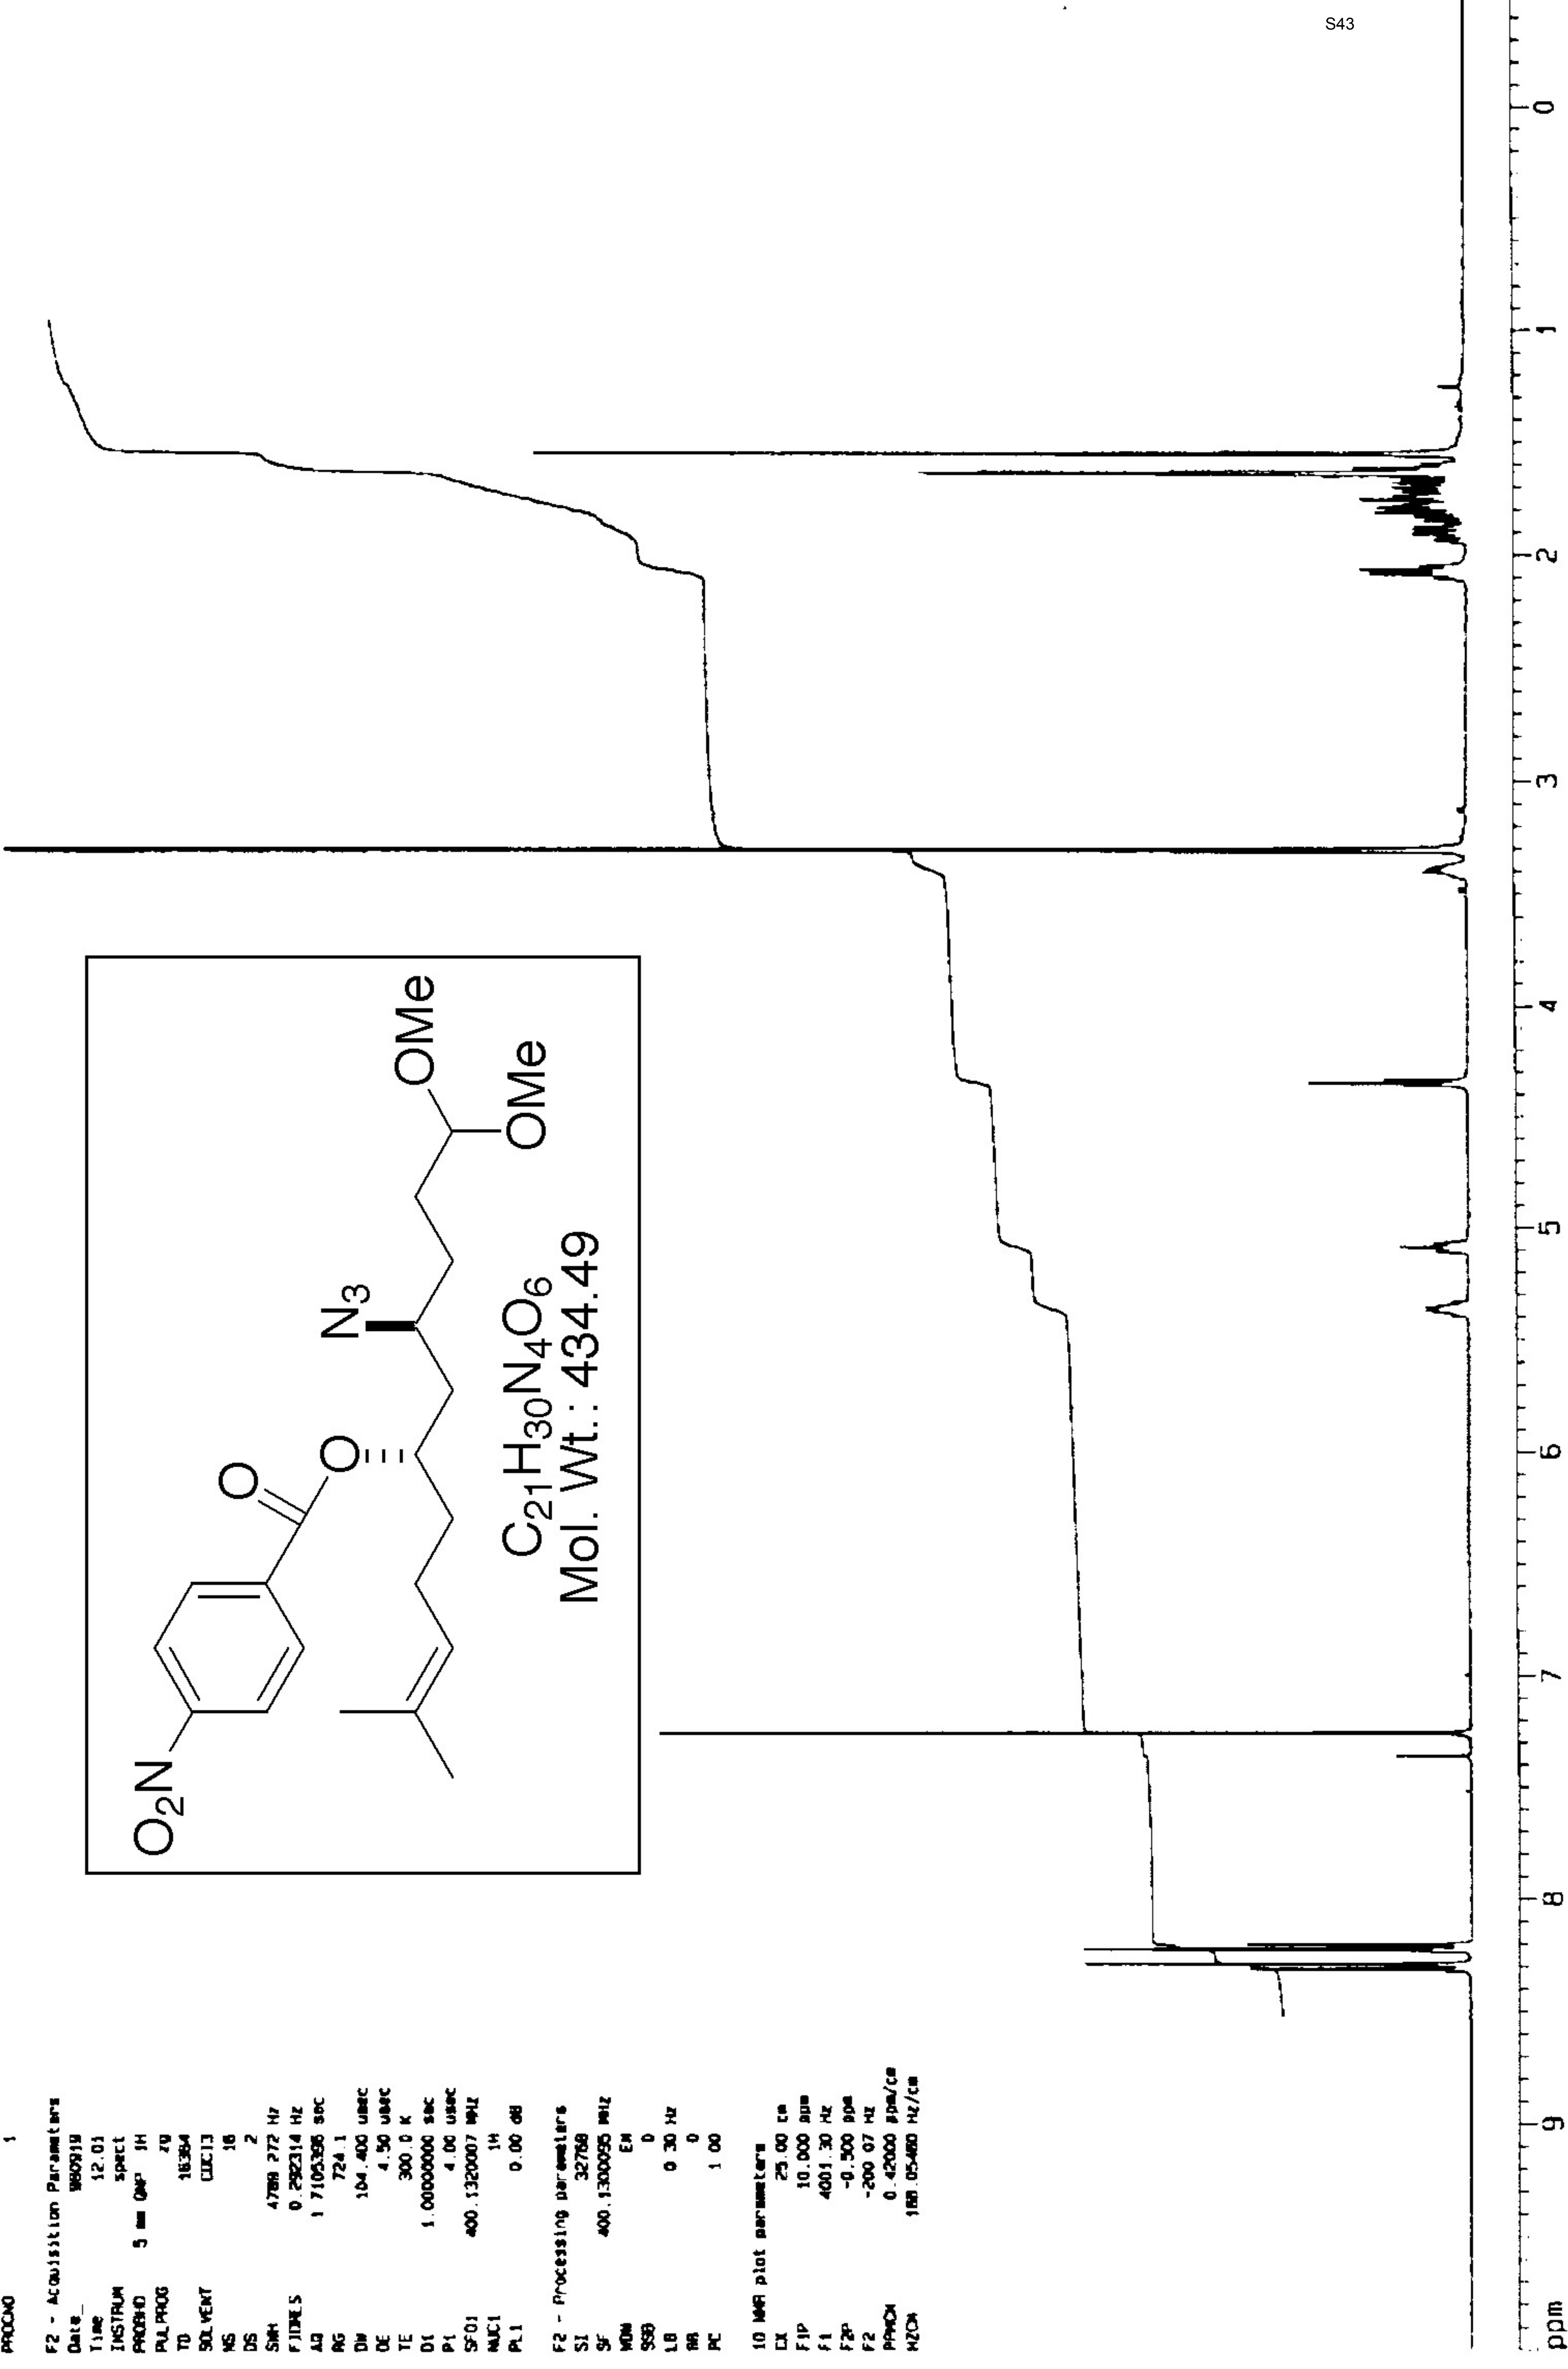

Current Data Parameters  
 NAME fc-11-247  
 EXPNO 3  
 PROCNO 1

F2 - Acquisition Parameters  
 Date\_ 980725  
 Time 15.52  
 INSTRUM spect  
 PROBHD 5 mm broadband  
 PULPROG zgdc  
 TD 32768  
 SOLVENT CDCl3  
 NS 515  
 DS 0  
 SWH 31446.541 Hz  
 FIDRES 0.959672 Hz  
 AQ 0.5210612 sec  
 RG 4597.6  
 DW 15.900 usec  
 DE 4.50 usec  
 TE 300.0 K  
 D11 0.0300000 sec  
 PL12 15.00 dB  
 CPDPRG2 waltz16  
 PCPD2 79.50 usec  
 SF02 500.0325001 MHz  
 NUC2 1H  
 PL2 120.00 dB  
 D1 2.0000000 sec  
 P1 3.00 usec  
 SF01 125.7457959 MHz  
 NUC1 13C  
 PL1 0.00 dB

F2 - Processing parameters  
 SI 16384  
 SF 125.7326463 MHz  
 WDM EM  
 SSB 0  
 LB 1.00 Hz  
 GB 0  
 PC 1.00

1D NMR plot parameters  
 CX 25.00 cm  
 F1P 200.000 ppe  
 F1 25146.53 Hz  
 F2P 0.000 ppe  
 F2 0.00 Hz  
 PPM0H 8.00000 ppe/cm  
 HZ0H 1005.86115 Hz/cm

164.21  
 150.55  
 135.68  
 132.69  
 130.70  
 123.57  
 122.87  
 104.10  
 77.26  
 77.00  
 76.75  
 73.15  
 59.32  
 53.26  
 52.87  
 39.11  
 34.61  
 29.93  
 28.99  
 25.65  
 23.88  
 17.67

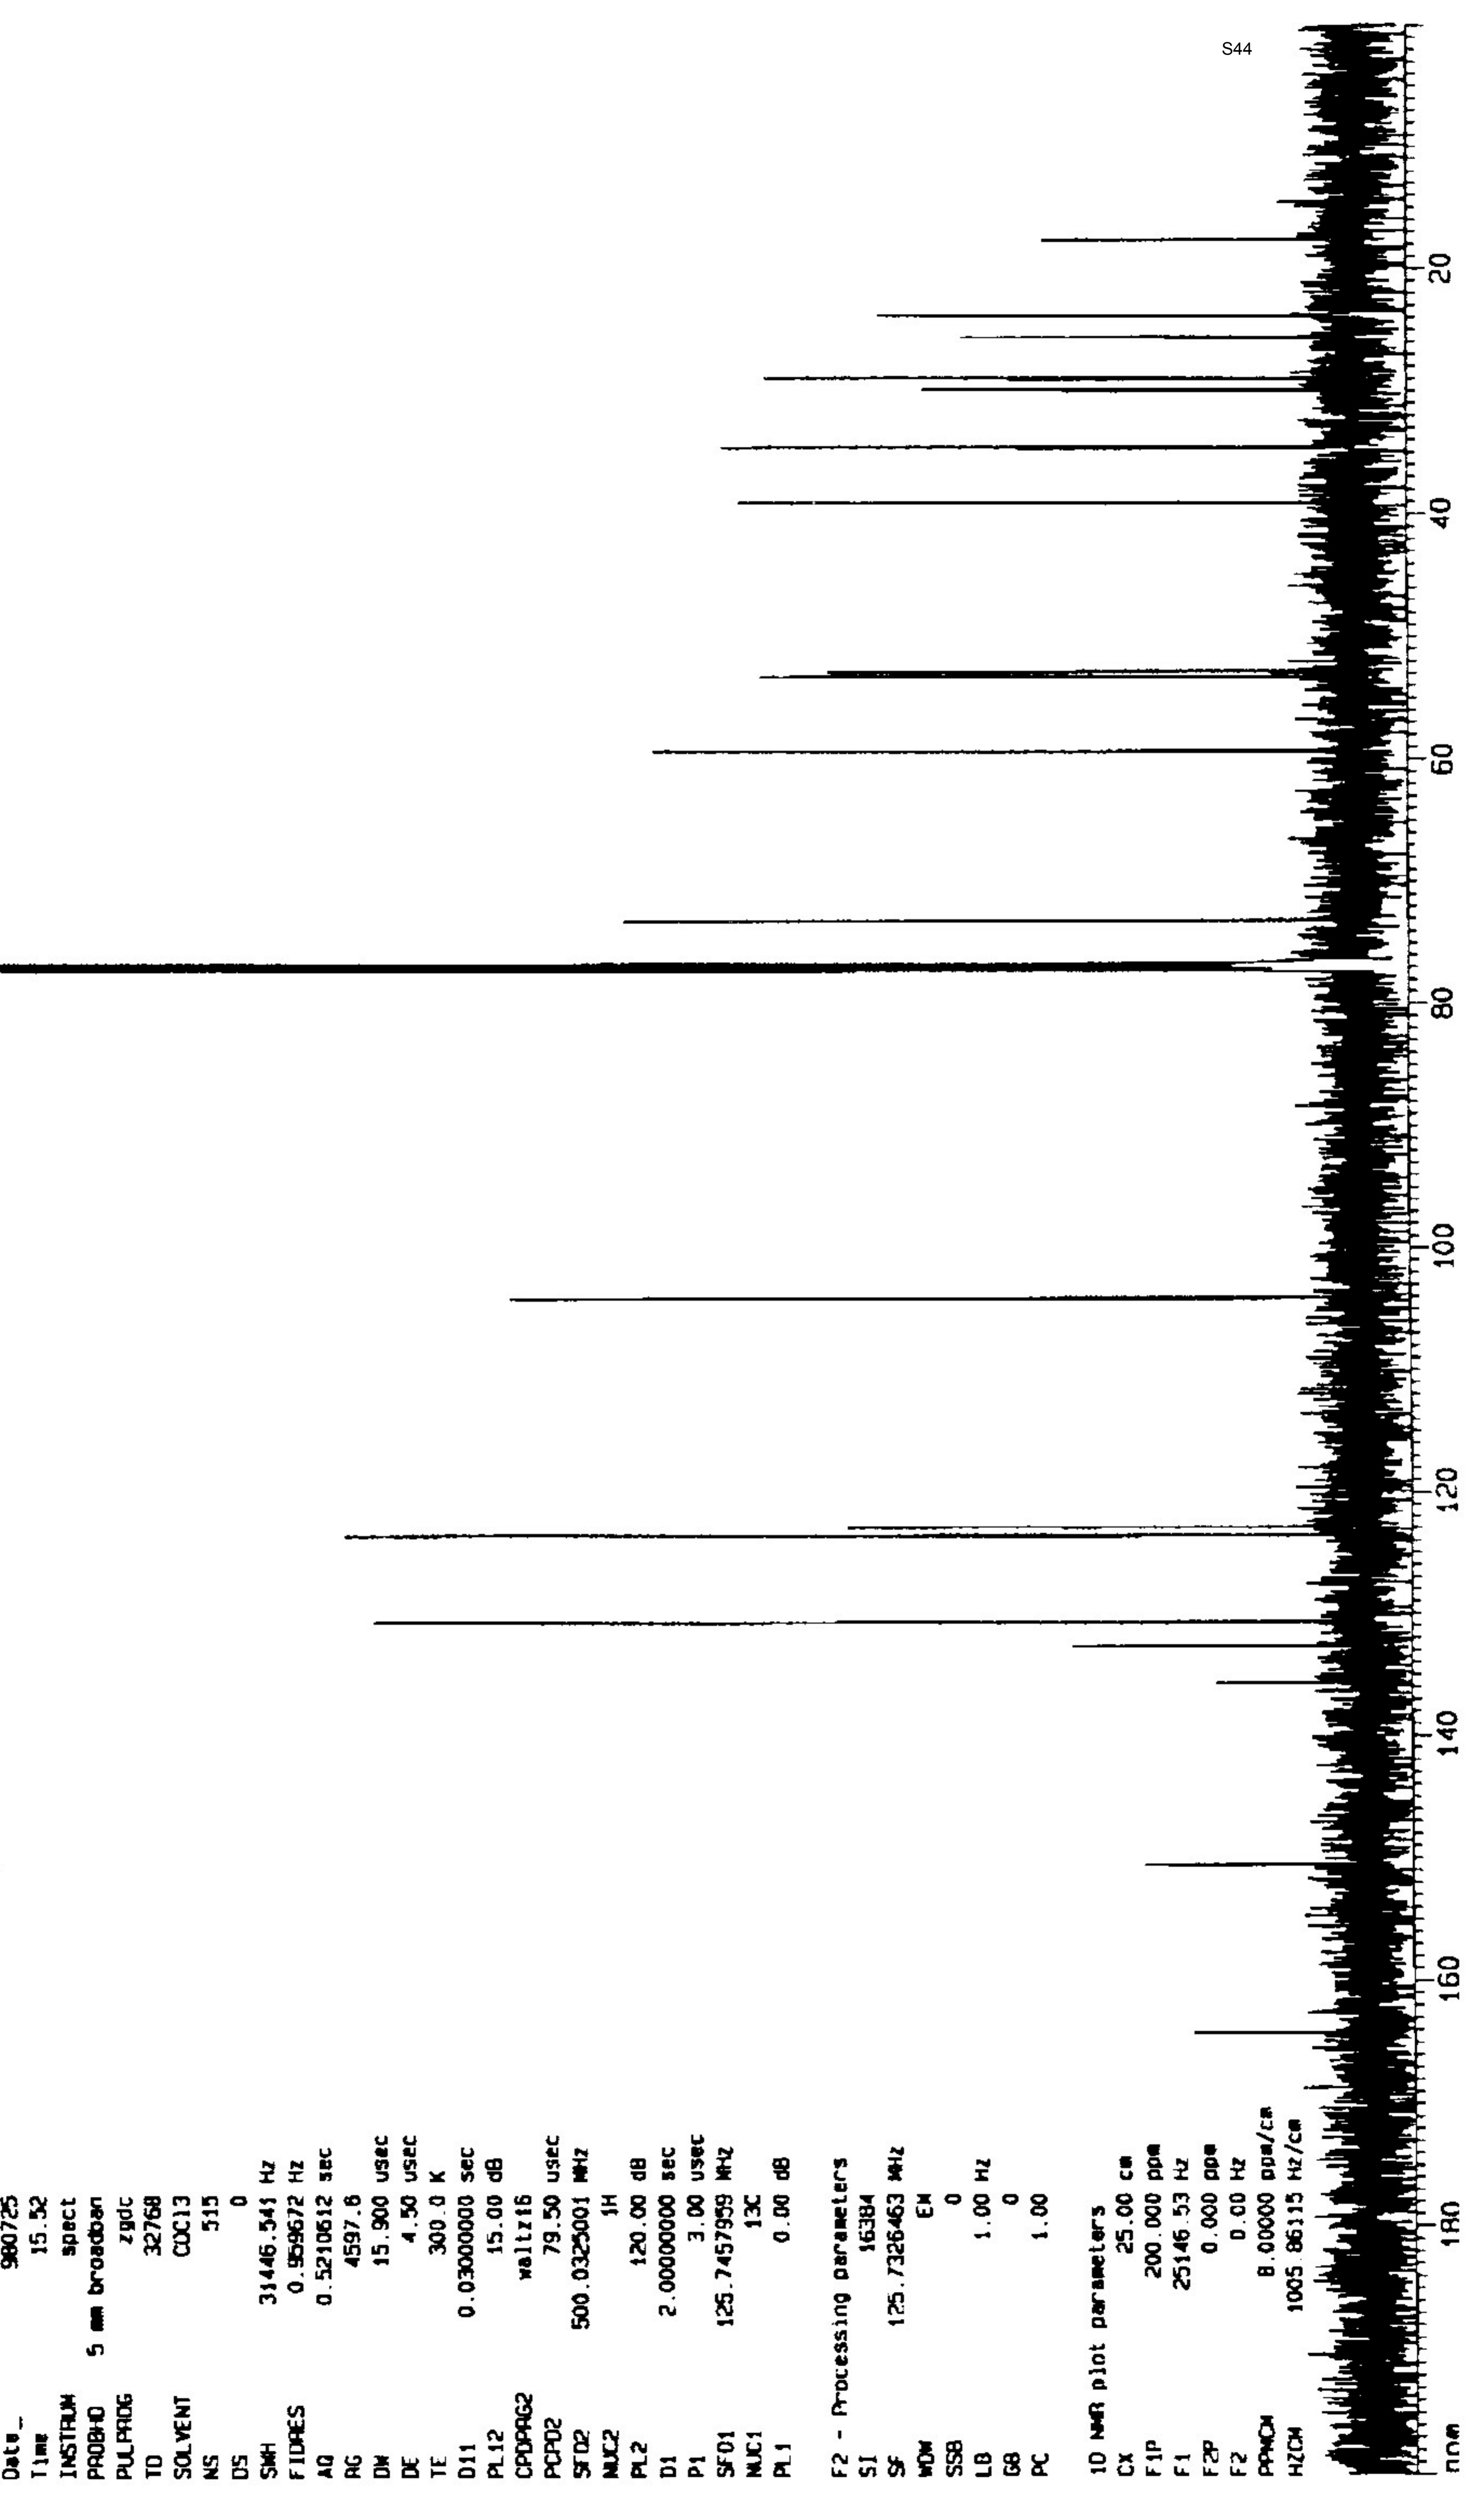

EXPNO 1  
PROCNO 1

F2 Acquisition Parameters

Date\_ 990106  
Time 8.21  
INSTRUM spect  
PROBHD 5 mm QNP 1H  
PULPROG zgpg30  
TD 65536  
SFAVENT 10011  
NS 16  
DS 2  
SWH 4789.272 Hz  
FIDRES 0.292314 Hz  
AQ 1.7103395 sec  
RG 322.5  
DM 104.480 usec  
DE 4.50 usec  
TE 300.2 K  
D1 1.00000000 sec  
P1 4.80 usec  
SFO1 400.1300002 MHz  
MUL1 1H  
PC 1.03

F2 - Processing parameters

SI 32768  
SF 400.1300002 MHz  
WDW EM  
SSB 0  
LB 0.32 Hz  
GB 0  
PC 1.03

10 MHz plot parameters

CH 2H.00 cm  
FHP 10.000 ppm  
F1 400.130 Hz  
F2 -8.500 ppm  
F3 -290.07 Hz  
NUC1 0.4200000000  
HZLH 156.92460 MHz

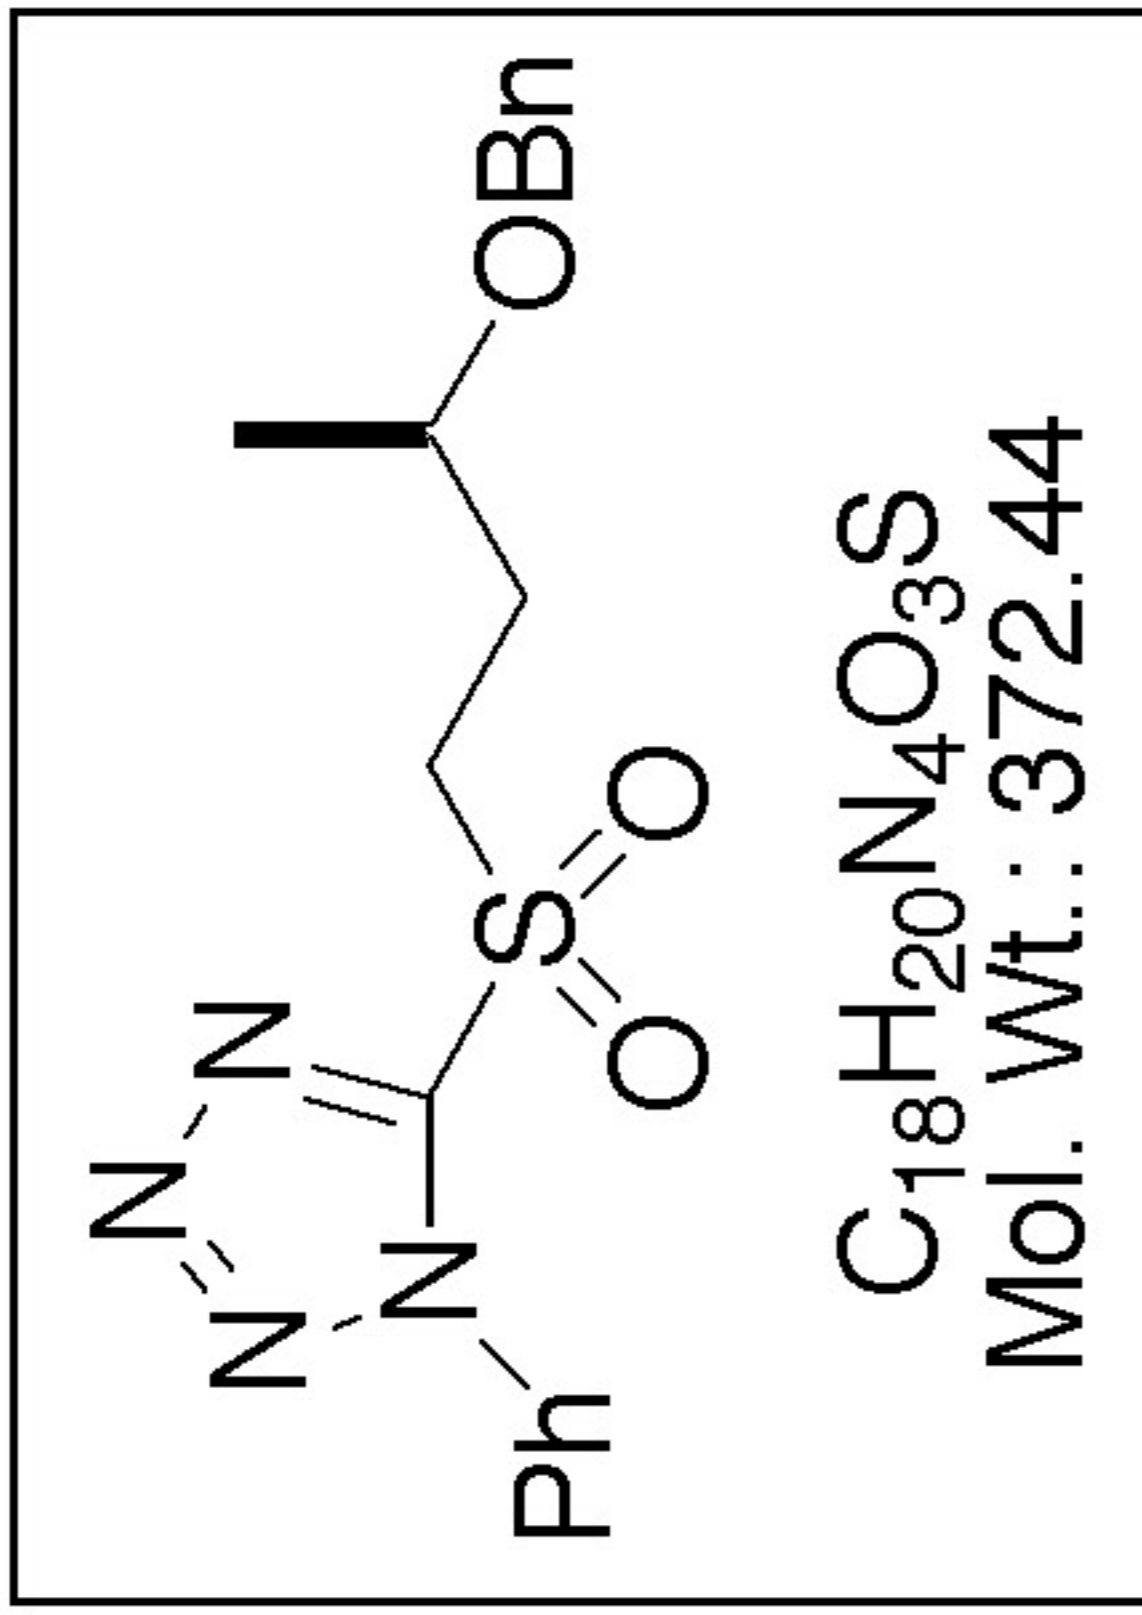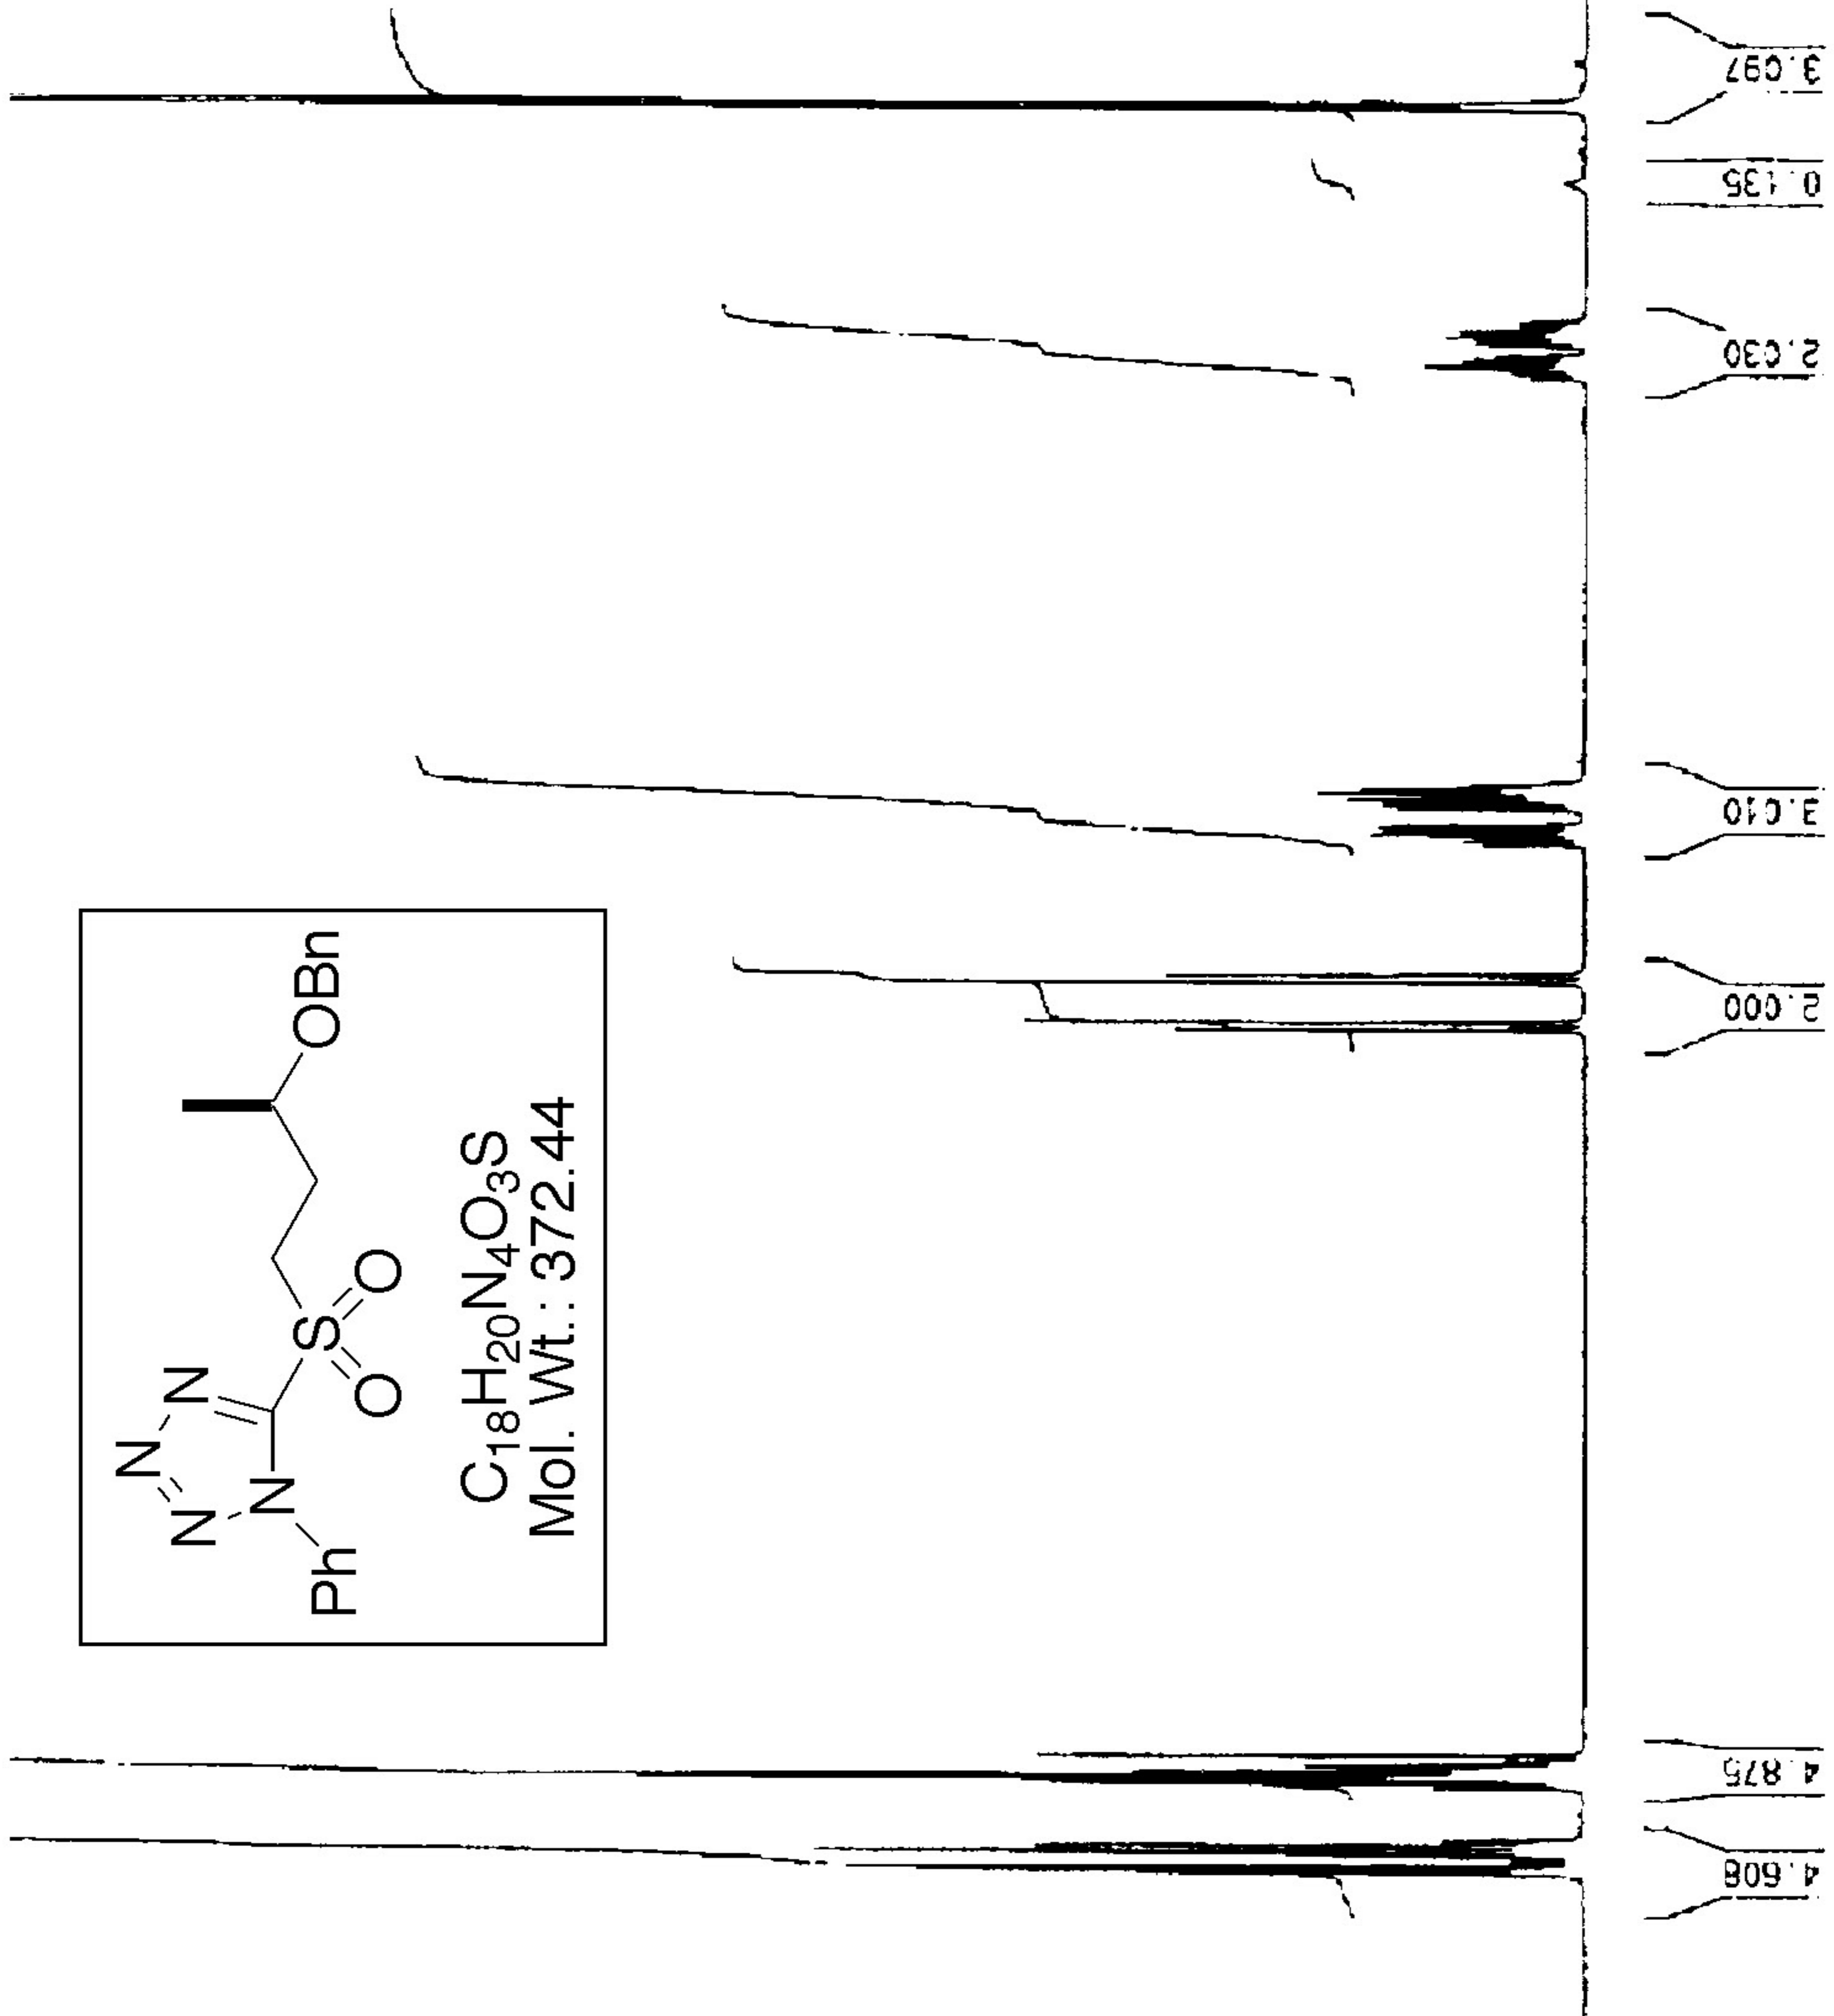

5.000

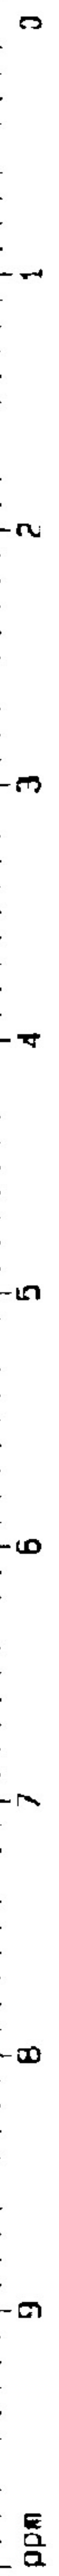



Current Data Parameters  
NAME f0-11-161  
EXPNO 1  
PROCNO 1

F2 - Acquisition Parameters

Date\_ 990106  
Time 9:27  
INSTRUM spect  
PROBHD 5 mm QNP 1H  
PULPROG zgpg30  
TD 32768  
SOLVENT CDCl3  
NS 385  
DS 0  
SWH 25129.629 Hz  
FIDRES 0.786773 Hz  
AQ 0.0521332 sec  
RG 2048  
DM 19.900 usec  
DE 4.50 usec  
TE 300.0 K  
O11 0.03000000 sec  
PL12 17.00 dB  
CPOPRG2 mlev16  
PCPRG2 90.00 usec  
SF02 400.1320007 MHz  
NUC2 1H  
PL2 17.00 dB  
D1 2.00000000 sec  
P1 4.00 usec  
SF01 100.6229933 MHz  
NUC1 13C  
PL1 0.00 dB

F2 - Processing parameters

SI 32768  
SF 100.6127766 MHz  
WDW EM  
SSB 0  
LB 1.00 Hz  
GB 0  
PC 1.00

1D NMR plot parameters

CX 25.00 cm  
F1P 200.000 pps  
F1 20122.55 Hz  
F2P 0.000 pps  
F2 0.00 Hz  
PPMCM 8.00000 ppm/cm  
HZCM 804.90272 Hz/cm

153.4  
138.1  
133.0  
131.4  
129.6  
128.4  
127.7  
127.7  
127.7  
125.1  
77.3  
77.0  
76.7  
72.1  
70.4  
52.7  
28.9  
19.3

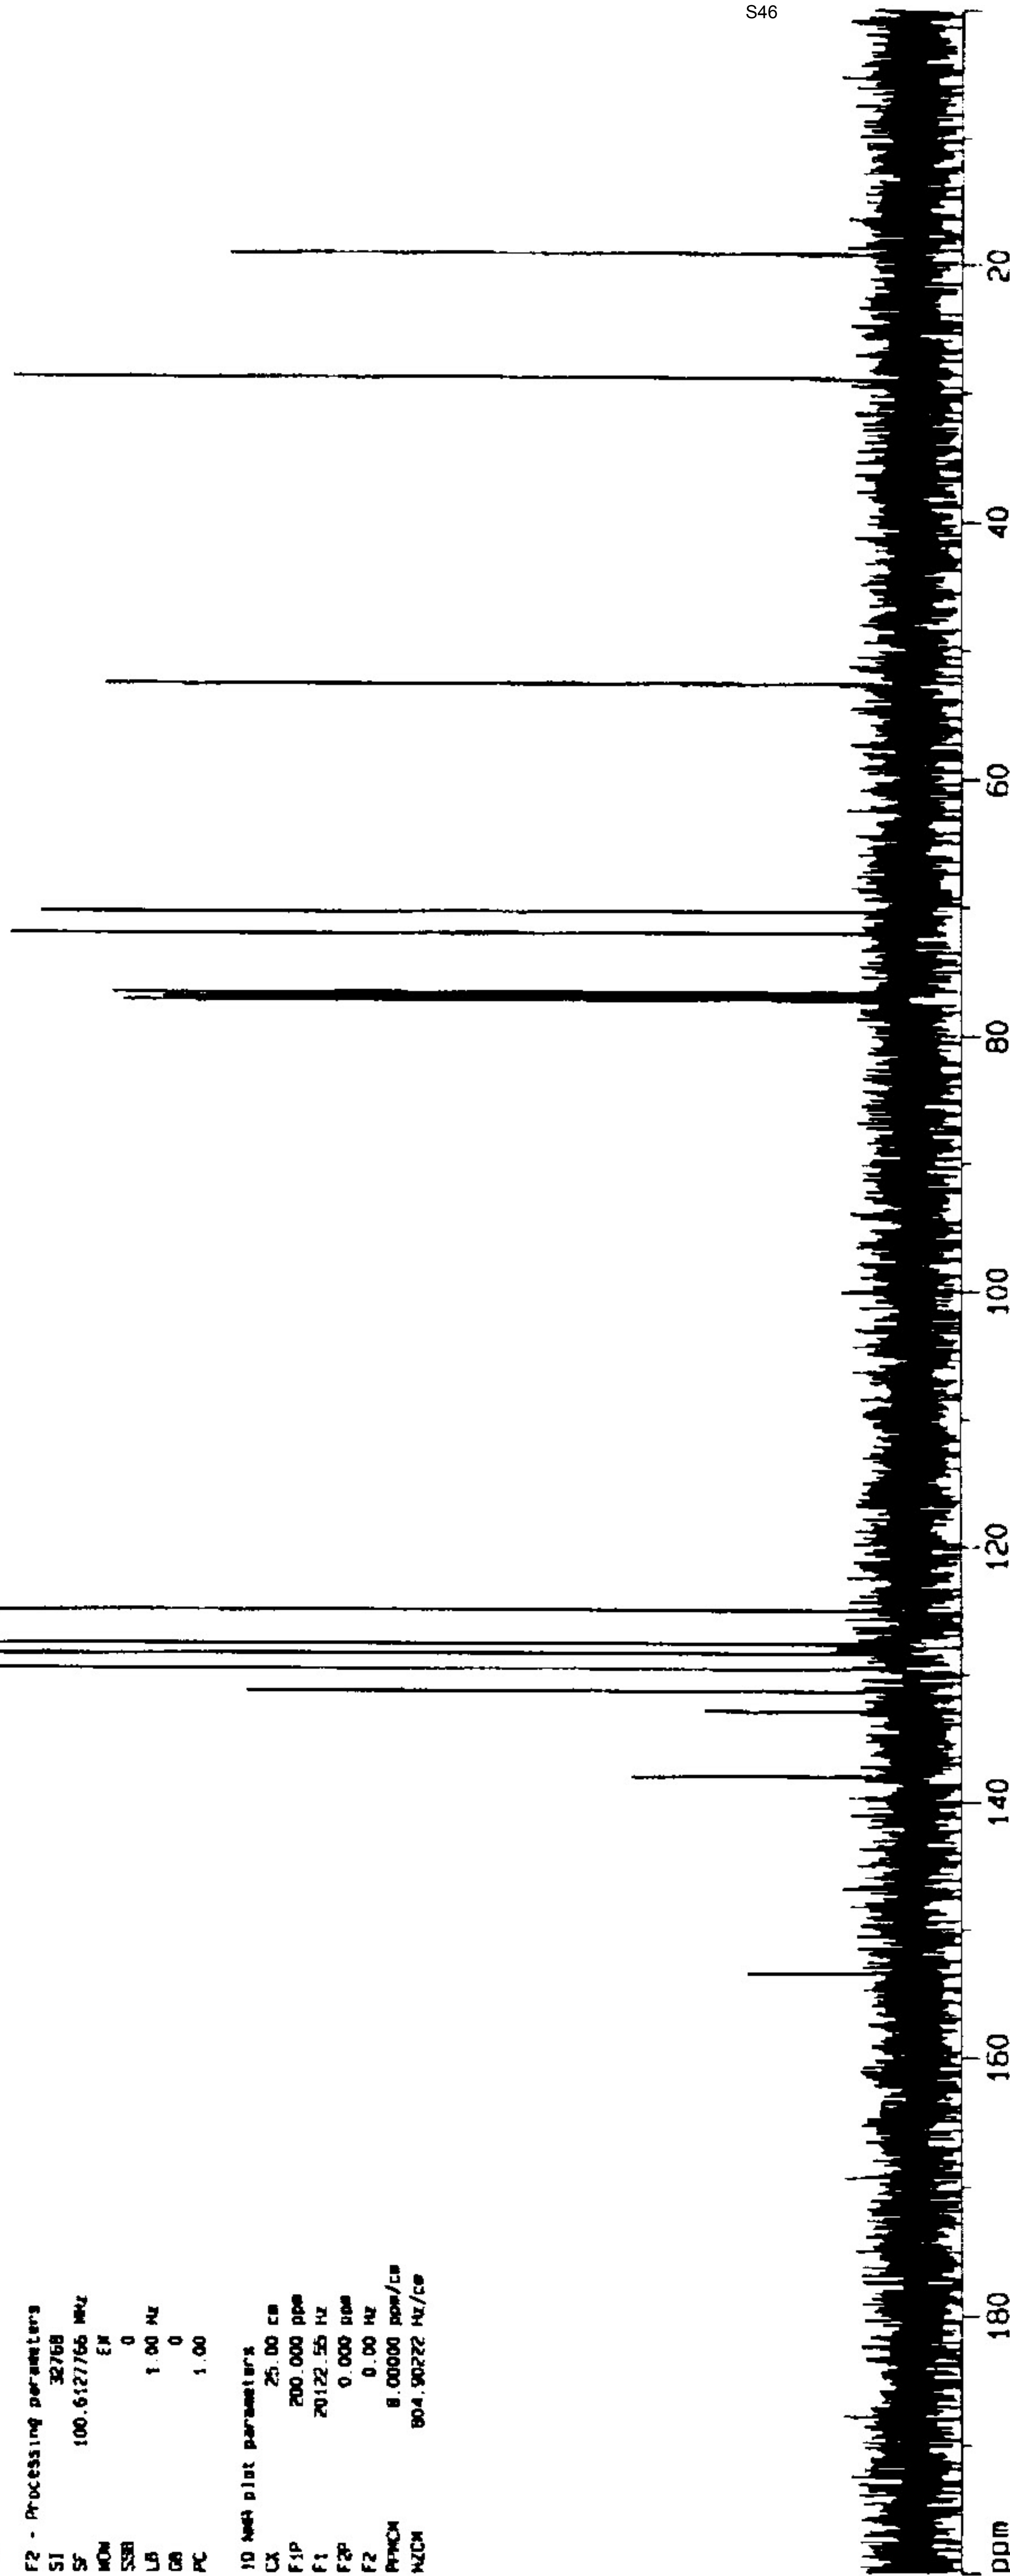

Current Date Parameters  
NAME fc-111-172  
EXPNO 2  
PROCNO 1

F2 - Acquisition Parameters  
Date\_ 990112  
Time 19.04  
INSTRUM spect  
PROBHD 5 mm DNP 1H  
PULPROG zg  
TD 16384  
SOLVENT CDCl3  
NS 16  
DS 2  
SWH 4789.272 Hz  
FIDRES 0.292314 Hz  
AQ 1.7105396 sec  
RG 322.5  
DM 104.400 usec  
DE 4.50 usec  
TE 300.0 K  
D1 1.00000000 sec  
P1 4.00 usec  
SFO1 400.1320007 MHz  
NUC1 1H  
PL1 0.00 dB

F2 - Processing parameters  
SI 32768  
SF 400.130093 MHz  
WDW EM  
SSB 0  
LB 0.30 Hz  
GB 0  
PC 1.00

1D NMR plot parameters  
CX 25.00 cm  
F1P 10.000 ppm  
F1 4001.30 Hz  
F2P -0.500 ppm  
F2 -200.07 Hz  
PRACH 0.42000 ppm/cm  
HZCK 168.05460 Hz/cm

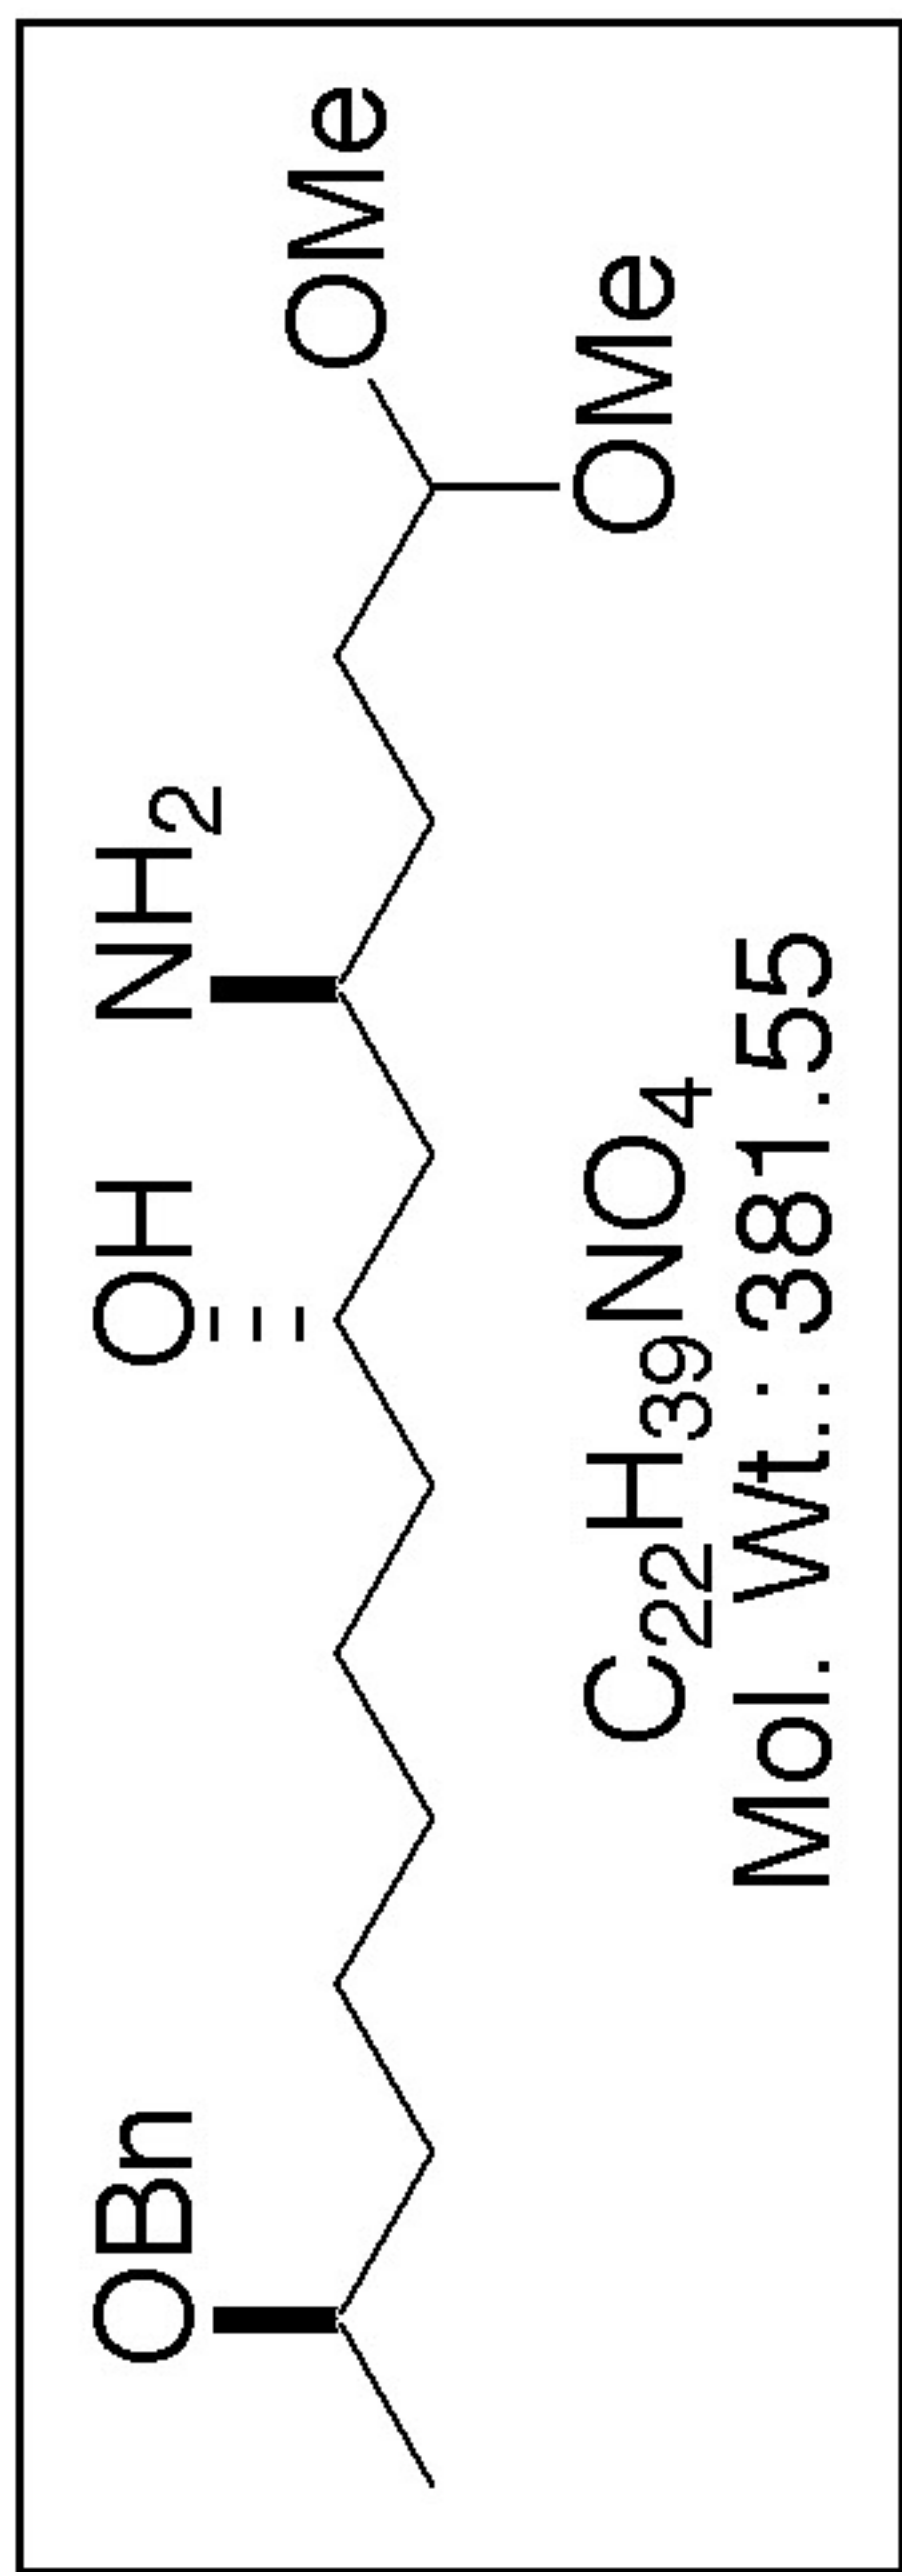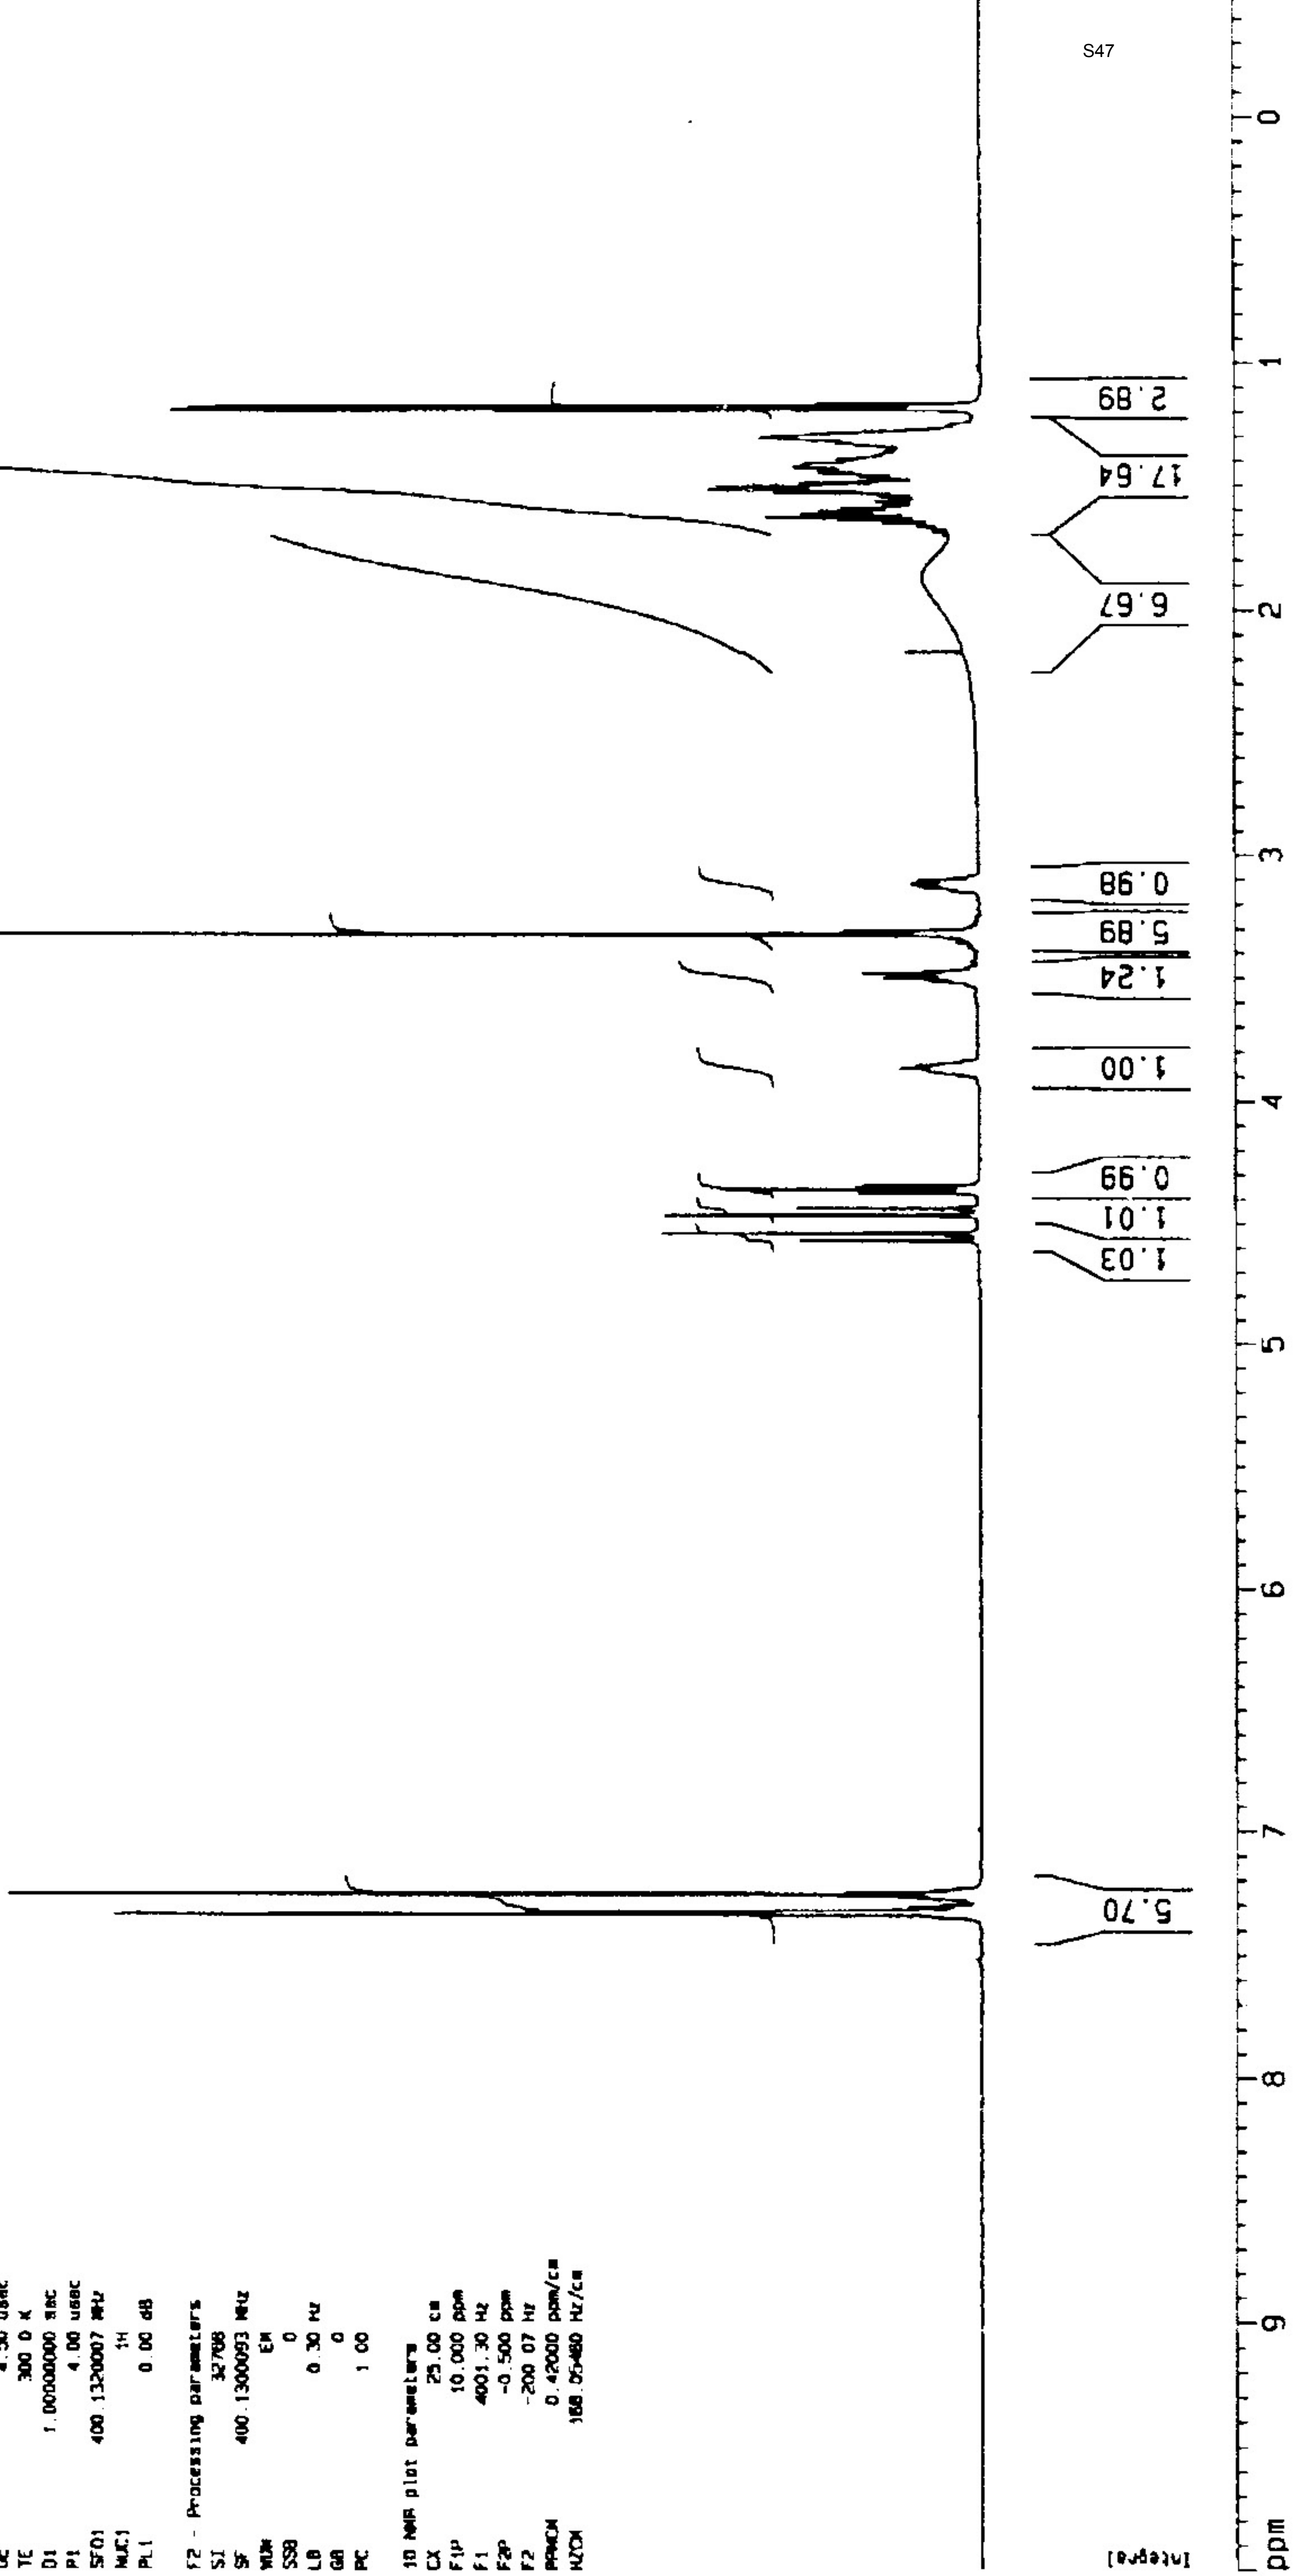

Integrals

ppm

Current Data Parameters

NAME fc-111-172  
 EXPNO 3  
 PRGNO 1

F2 - Acquisition Parameters

Date\_ 990112  
 Time 19.13  
 INSTRUM spect  
 PULPROG zgpg  
 TD 32768  
 SOLVENT CDCl3  
 NS 1096  
 DS 0  
 SM 25125.629 Hz  
 FIDRES 0.766773 Hz  
 AQ 0.6521332 sec  
 RG 2048  
 DW 19.900 usec  
 DE 4.50 usec  
 TE 300.0 K  
 D11 0.0300000 sec  
 PL12 17.00 dB  
 D1PRG2 mlev16  
 PCPD2 90.00 usec  
 SF02 400.1320007 MHz  
 NUC2 1H  
 PL2 17.00 dB  
 O1 2.0000000 sec  
 P1 4.00 usec  
 SF01 100.6232933 MHz  
 NUC1 13C  
 PL1 0.00 dB

F2 - Processing Parameters

SF 32768  
 SF 100.612712 MHz  
 WDW EM  
 SSB 0  
 LB 1.00 Hz  
 GB 0  
 PC 1.00

10 NMR plot parameters

CX 25.00 cm  
 F1P 200.000 ppm  
 F1 20122.55 Hz  
 F2P 0.000 ppm  
 F2 0.00 Hz  
 PPM04 8.00000 ppm/cm  
 HZCM 804.80216 Hz/cm

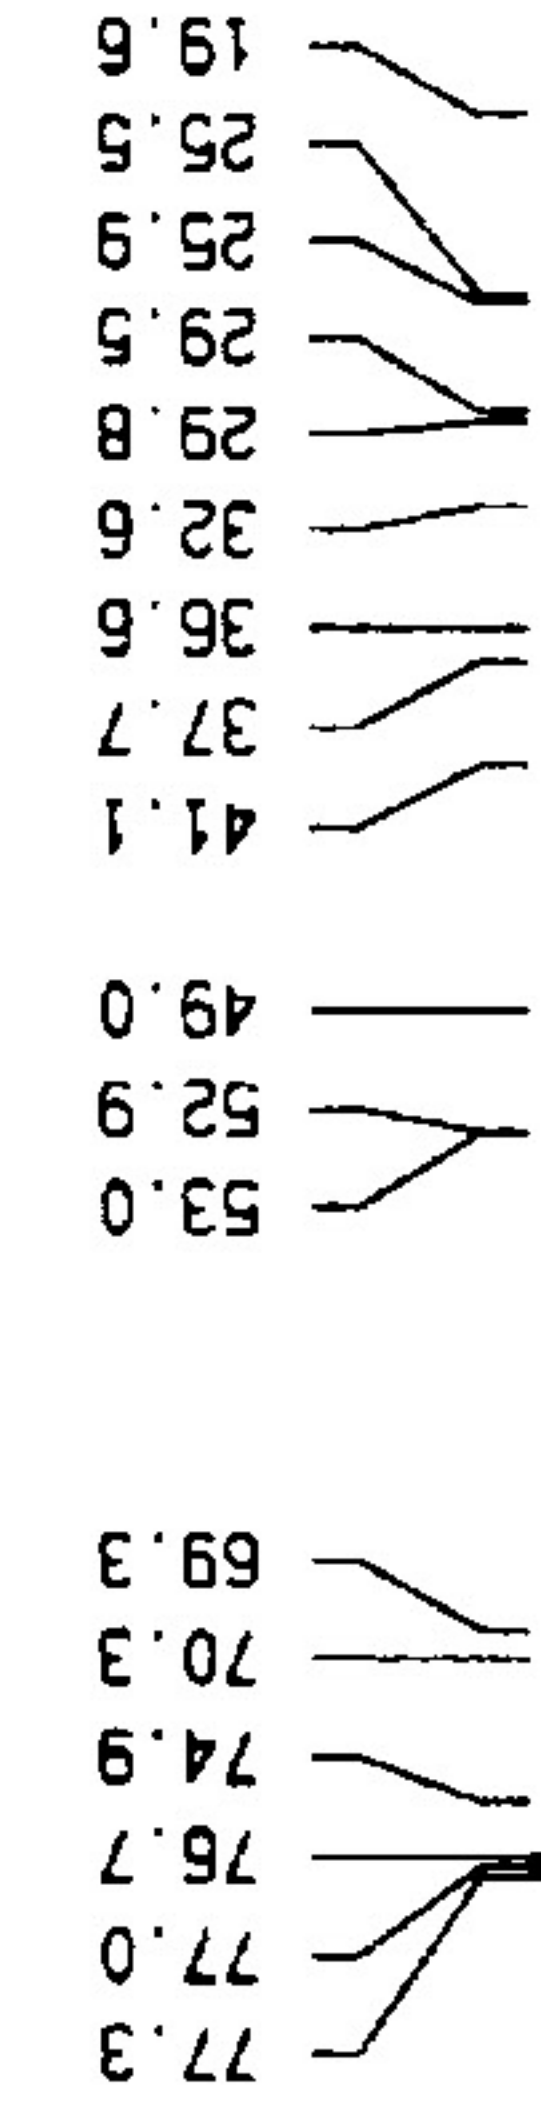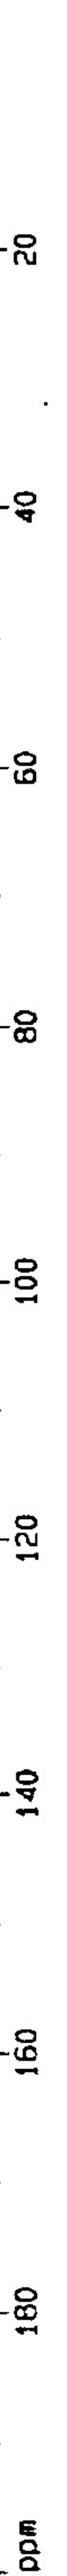

Current Date Parameters  
NAME 12-11-179  
EXPCNC  
PROCNC

F2 - Acquisition Parameters  
Date: 99012  
Time 10 29  
INSTRUM spect  
PROBHD 5 mm QNP 1H  
PULPROG zg  
TD 16384  
SOLVENT CDCl3  
NS 16  
DS 2  
SWH 4789.272 Hz  
FIDRES 0.292114 Hz  
AQ 1.7101396 sec  
RG 322.5  
DN 104.400 usec  
DC 4.50 usec  
TE 300.2 K  
DT 1.0000000 sec  
PI 4.00 usec  
SF01 400.120007 MHz  
NUC1 1H  
PL1 0.00 dB

F2 - Processing parameters  
SI 32788  
SF 400.1360093 MHz  
WDW EM  
SSB 0  
LB 0.30 Hz  
GB 0  
PC 1.00

1D NMR plot parameters  
EX 25.00 CF  
F1P 10.000 ppm  
F1 4001.30 Hz  
F2P -0.500 ppm  
F2 -200.07 Hz  
PPM0M 0.42000 ppm/cm  
MATH 16R 05460 Hz/cm

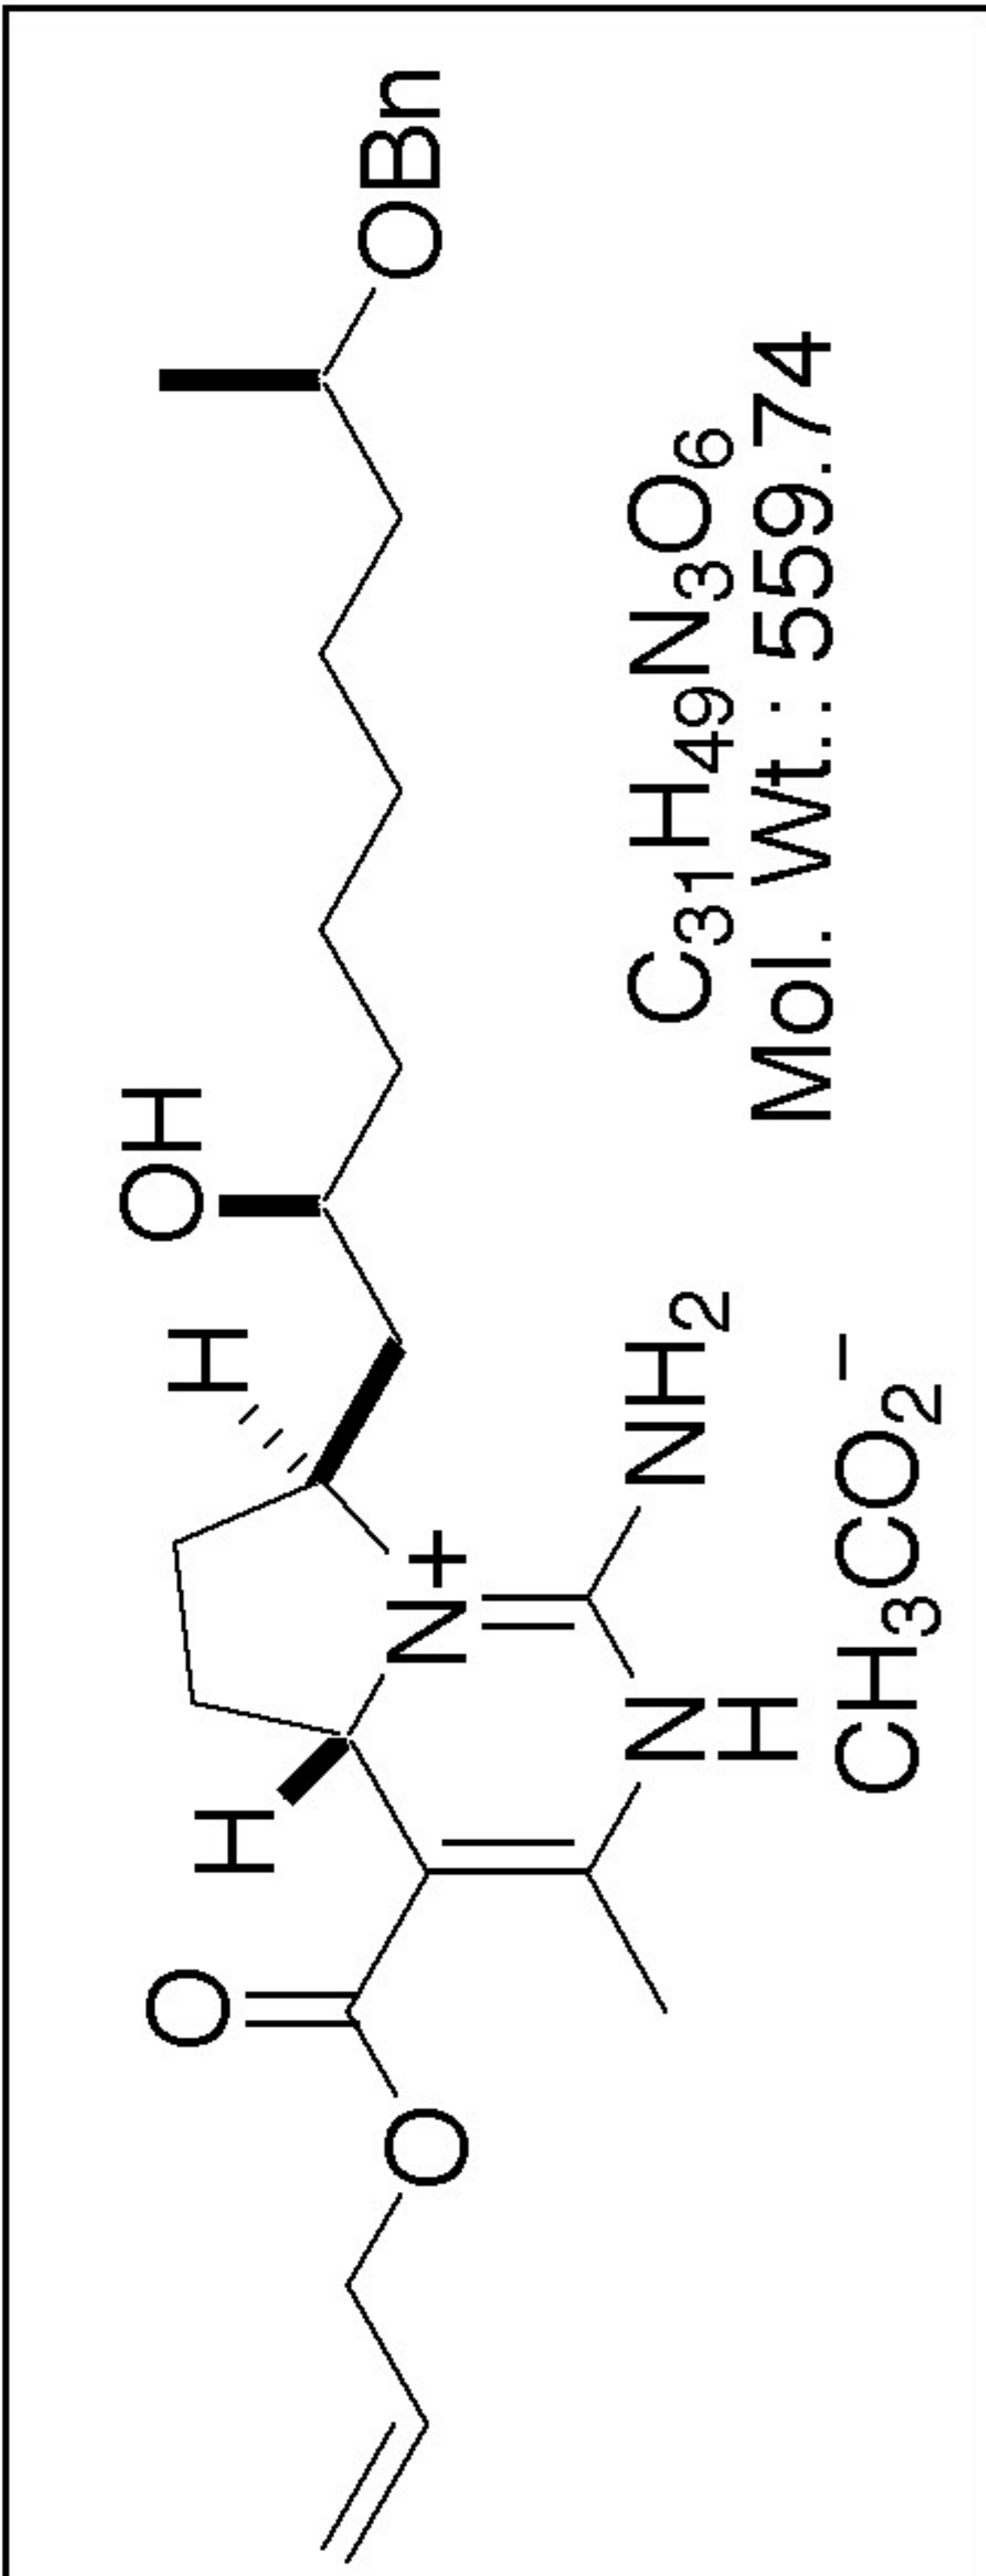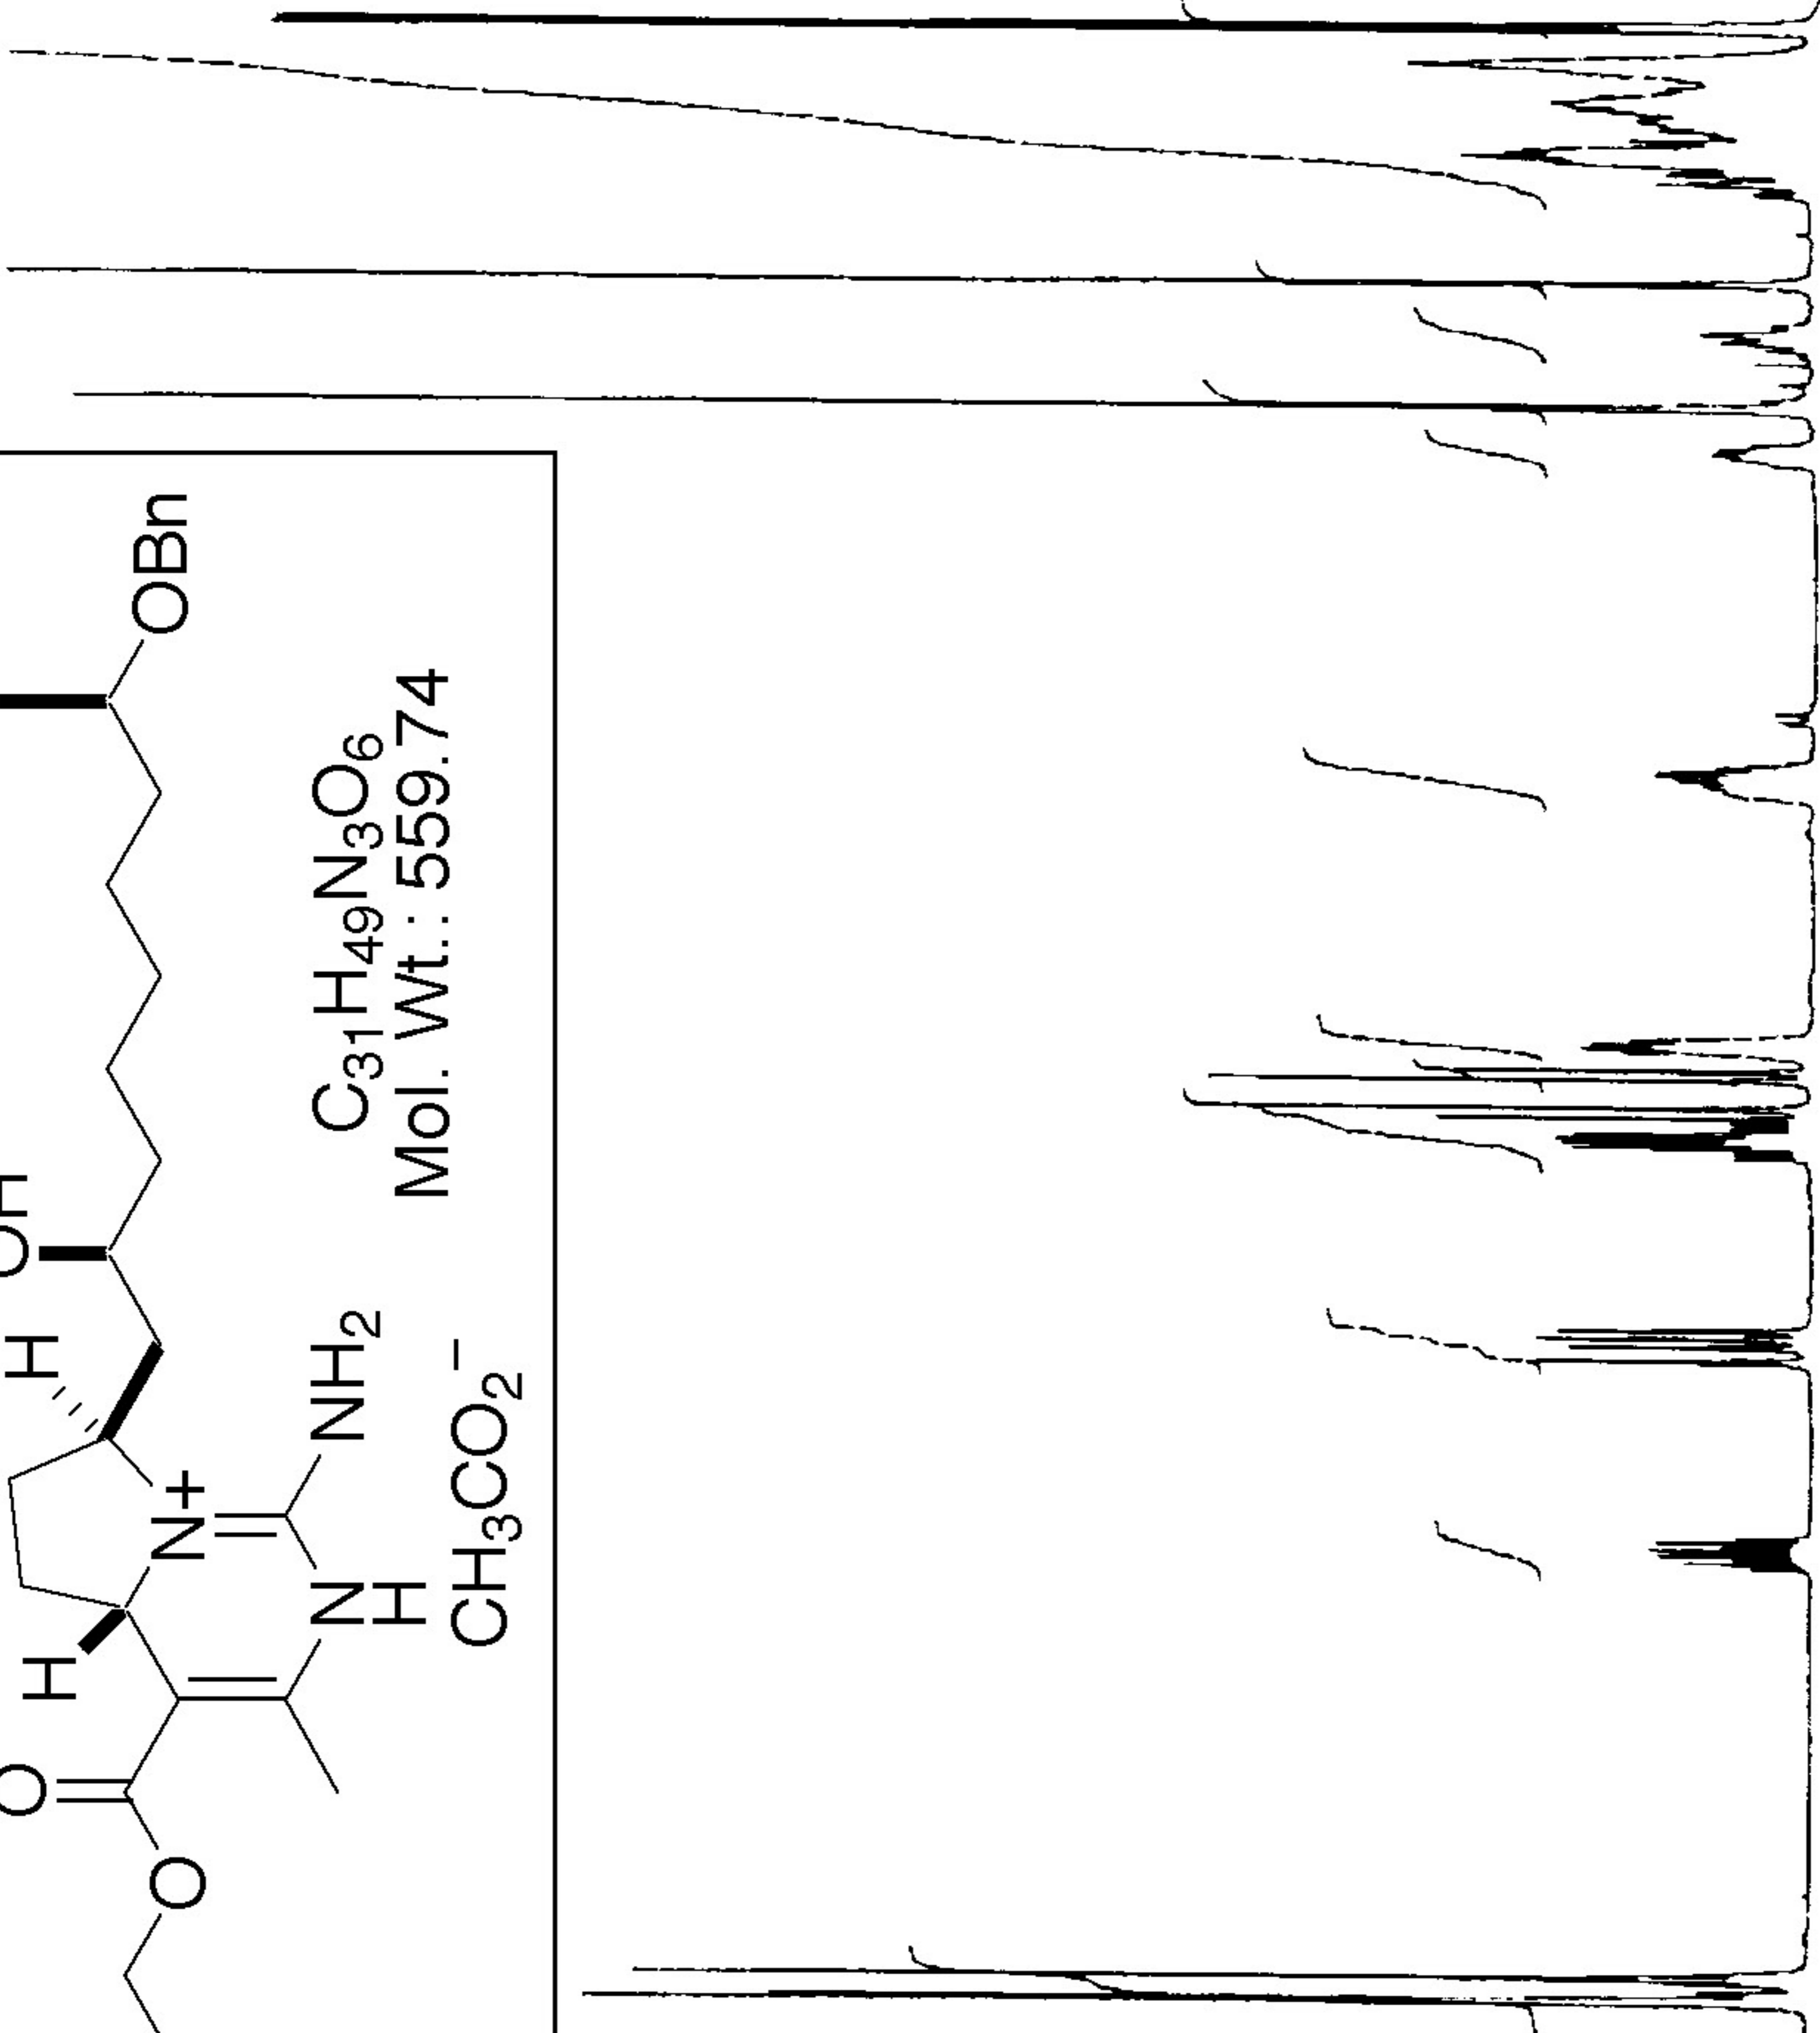

| Chemical Shift (ppm) | Integration |
|----------------------|-------------|
| 4.88                 | 4.88        |
| 2.86                 | 2.86        |
| 2.80                 | 2.80        |
| 1.75                 | 1.75        |
| 1.66                 | 1.66        |
| 1.03                 | 1.03        |
| 0.93                 | 0.93        |

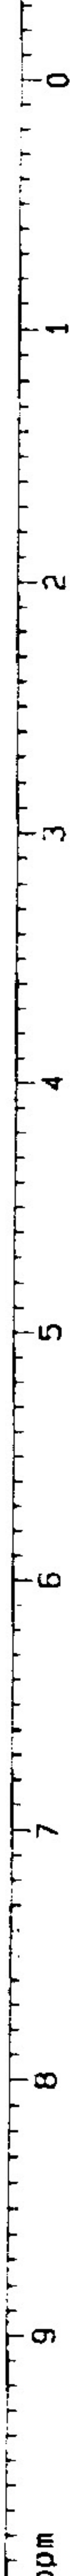

Current Data Parameters  
NAME 1c-111-179  
EXPNO 2  
PROCNO 1

F2 - Acquisition Parameters

Date\_ 990121  
Time 13 13  
INSTRUM spect  
PROBHD 5 mm QNP 1H  
PULPROG zgpg  
TD 32768  
SOLVENT C6D6  
NS 454  
DS 0  
SFO 25125.628 MHz  
FIDRES 0.766773 Hz  
AQ 0.6521332 sec  
RG 1825.5  
DM 19.900 usec  
DE 4.50 usec  
TE 300.0 K  
D11 0.03000000 sec  
P112 17.00 usec  
EPCPRG2 mlev15  
PCPD2 90.00 usec  
SFO2 400.1320007 MHz  
NUC2 1H  
P12 17.00 usec  
D1 2.00000000 sec  
P1 4.00 usec  
SFO1 100.6232933 MHz  
NUC1 13C  
P11 0.00 usec

F2 - Processing parameters

SI 32768  
SF 100.6127635 MHz  
WDW EM  
SSB 0  
LB 1.00 Hz  
GB 0  
PC 1.00

1D NMR plot parameters

EX 25.00 cm  
F1F 200.000 ppm  
F1 20122.56 Hz  
F2P 0.000 ppm  
F2 0.00 Hz  
P2MCK 8.00000 ppm/cm  
F2CV 804.90226 Hz/cm

179.2  
177.3  
177.0  
176.7  
174.7  
170.1  
167.5  
164.8  
155.9  
156.8  
155.9  
151.7  
145.1  
139.0  
132.1  
128.1  
127.4  
127.2  
118.3  
100.1  
77.3  
76.7  
74.7  
70.1  
67.5  
64.8  
56.8  
55.9  
41.9  
37.6  
36.4  
34.3  
29.8  
28.2  
25.4  
25.4  
24.3  
19.5  
17.3

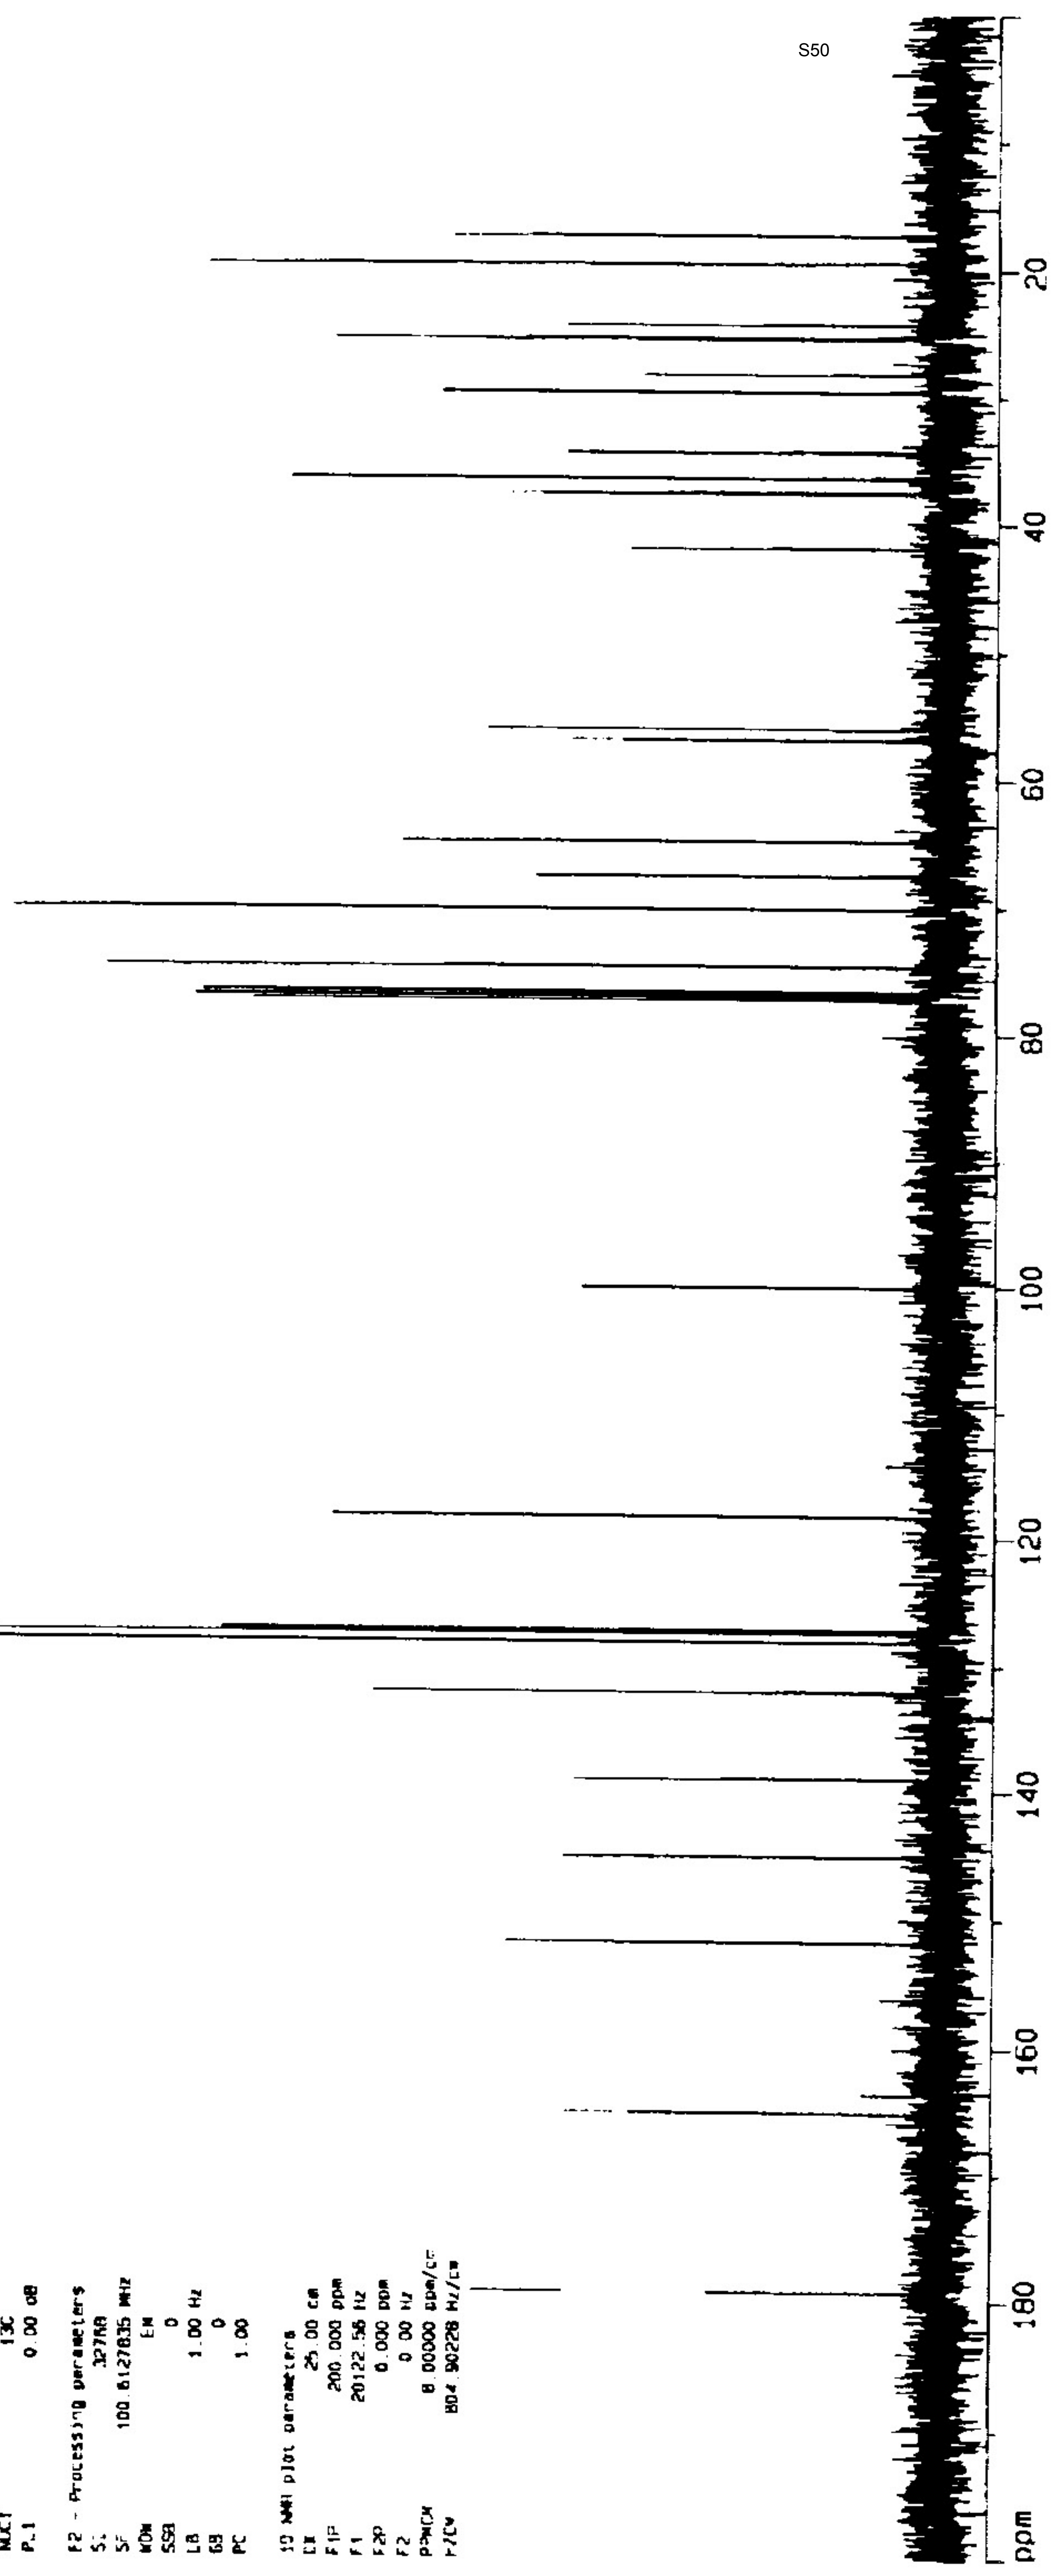

Current Data Parameters  
NAME 15-111-18502  
EXPNO 1  
PROCNO 1

F2 - Acquisition Parameters  
Date\_ 990201  
Time 8 25  
INSTRUM spect  
PROBHD 5 mm QNP 1H  
PULPROG zg  
TD 16384  
SOLVENT DMSO  
NS 16  
DS 2  
SWH 4785.272 Hz  
FIDRES 0.292314 Hz  
AQ 1.7105395 sec  
RG 322.5  
DM 104.400 usec  
DE 4.50 usec  
TE 300.0 K  
D1 1.0000000 sec  
P1 4.00 usec  
SFO1 400.1320007 MHz  
NUC1 1H  
PL1 0.00 dB

F2 - Processing parameters  
SI 32768  
SF 400.130093 MHz  
WDW EP  
SSB C  
LB 0.36 Hz  
GB C  
PC 1.00

1D NMR plot parameters  
EX 25.00 cr  
F1P 10.000 ppm  
F1 4001.30 Hz  
F2P -0.500 ppm  
F2 -200.07 Hz  
PPOCK C 42003 ppm/LW  
NUCK :bb.05463 Hz/cr

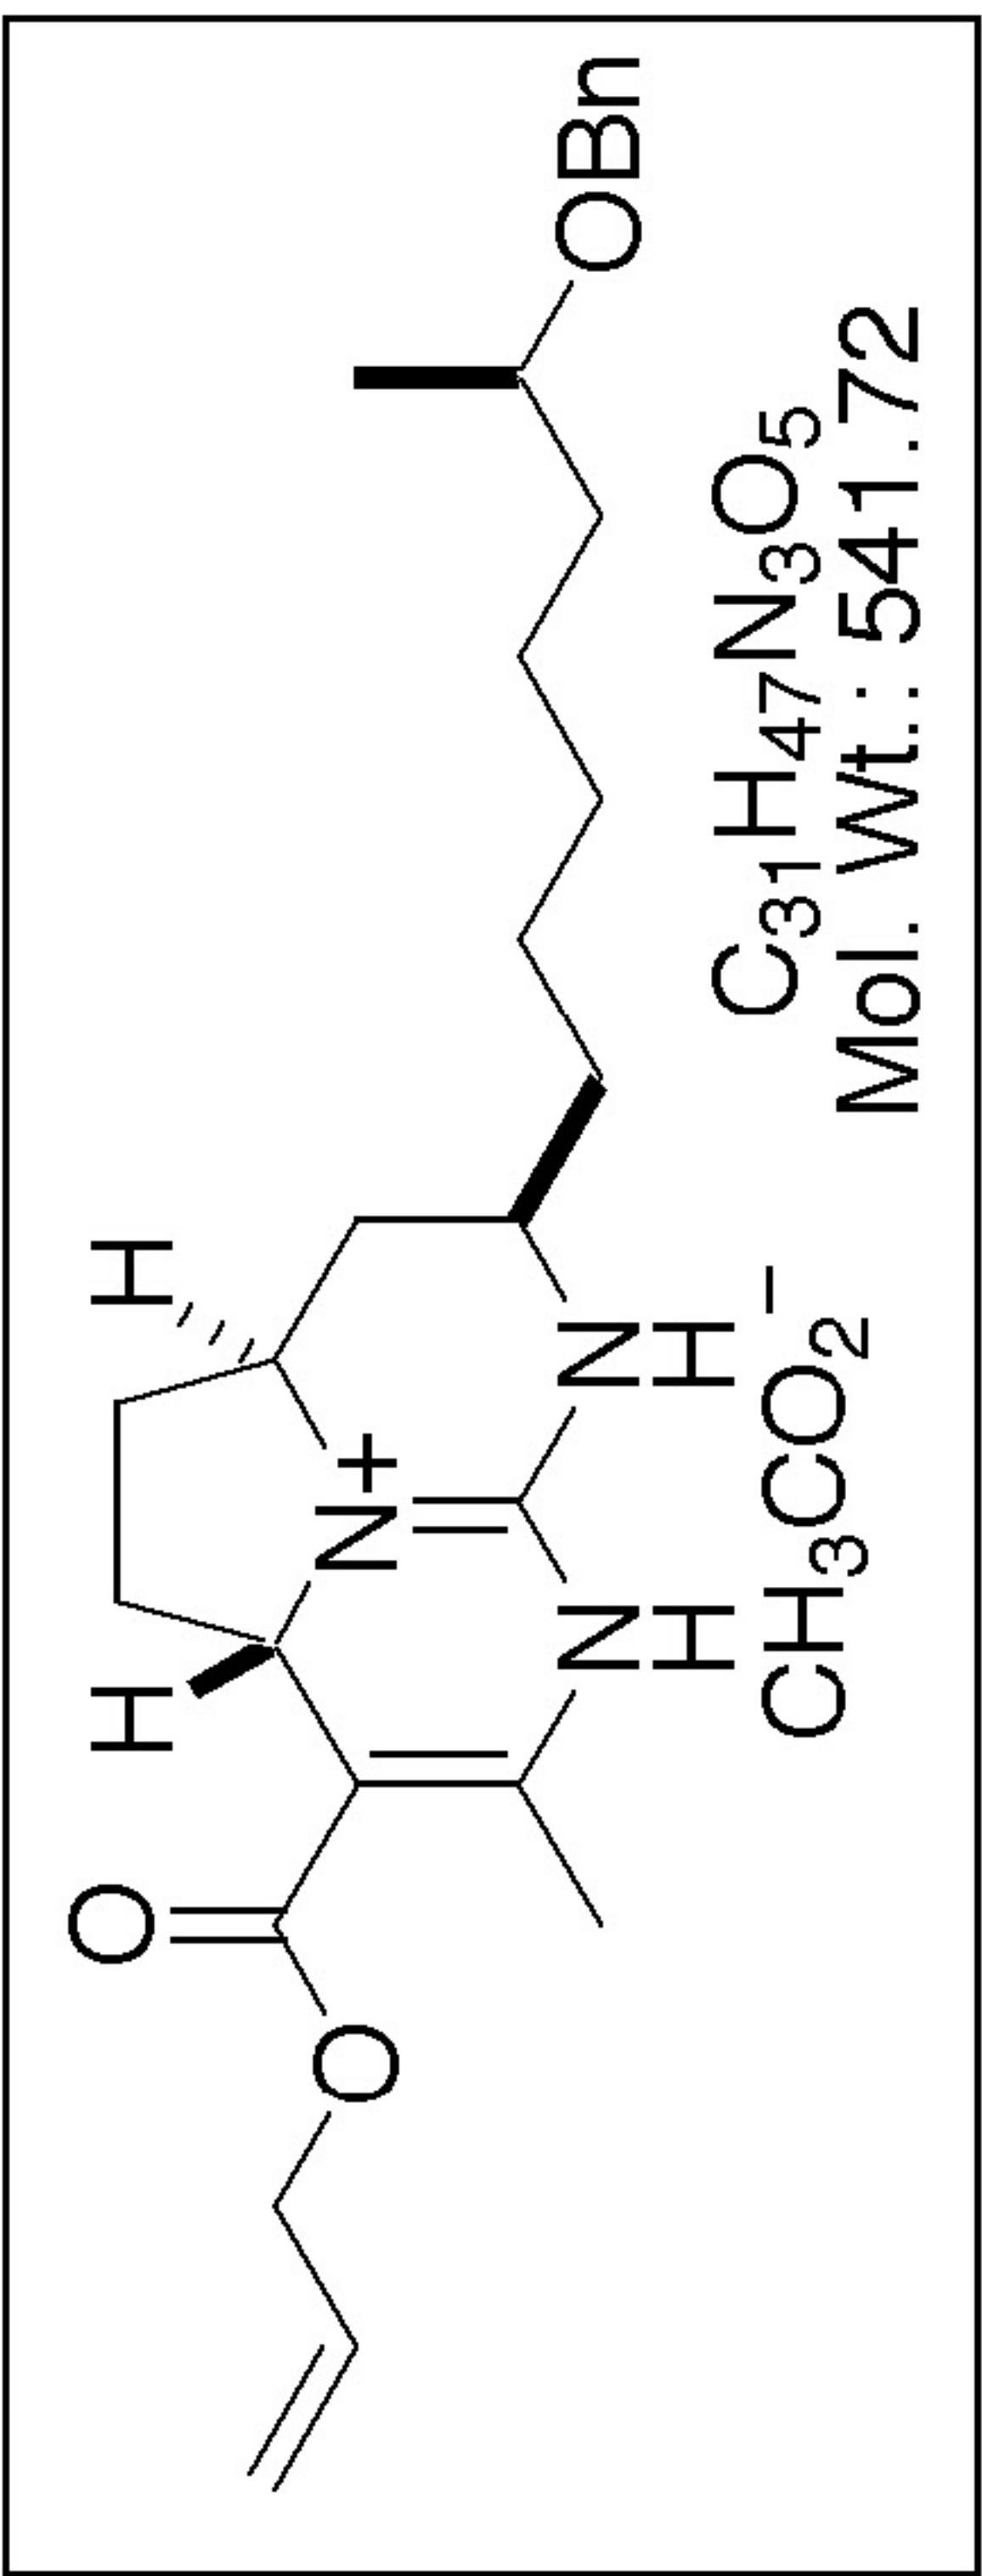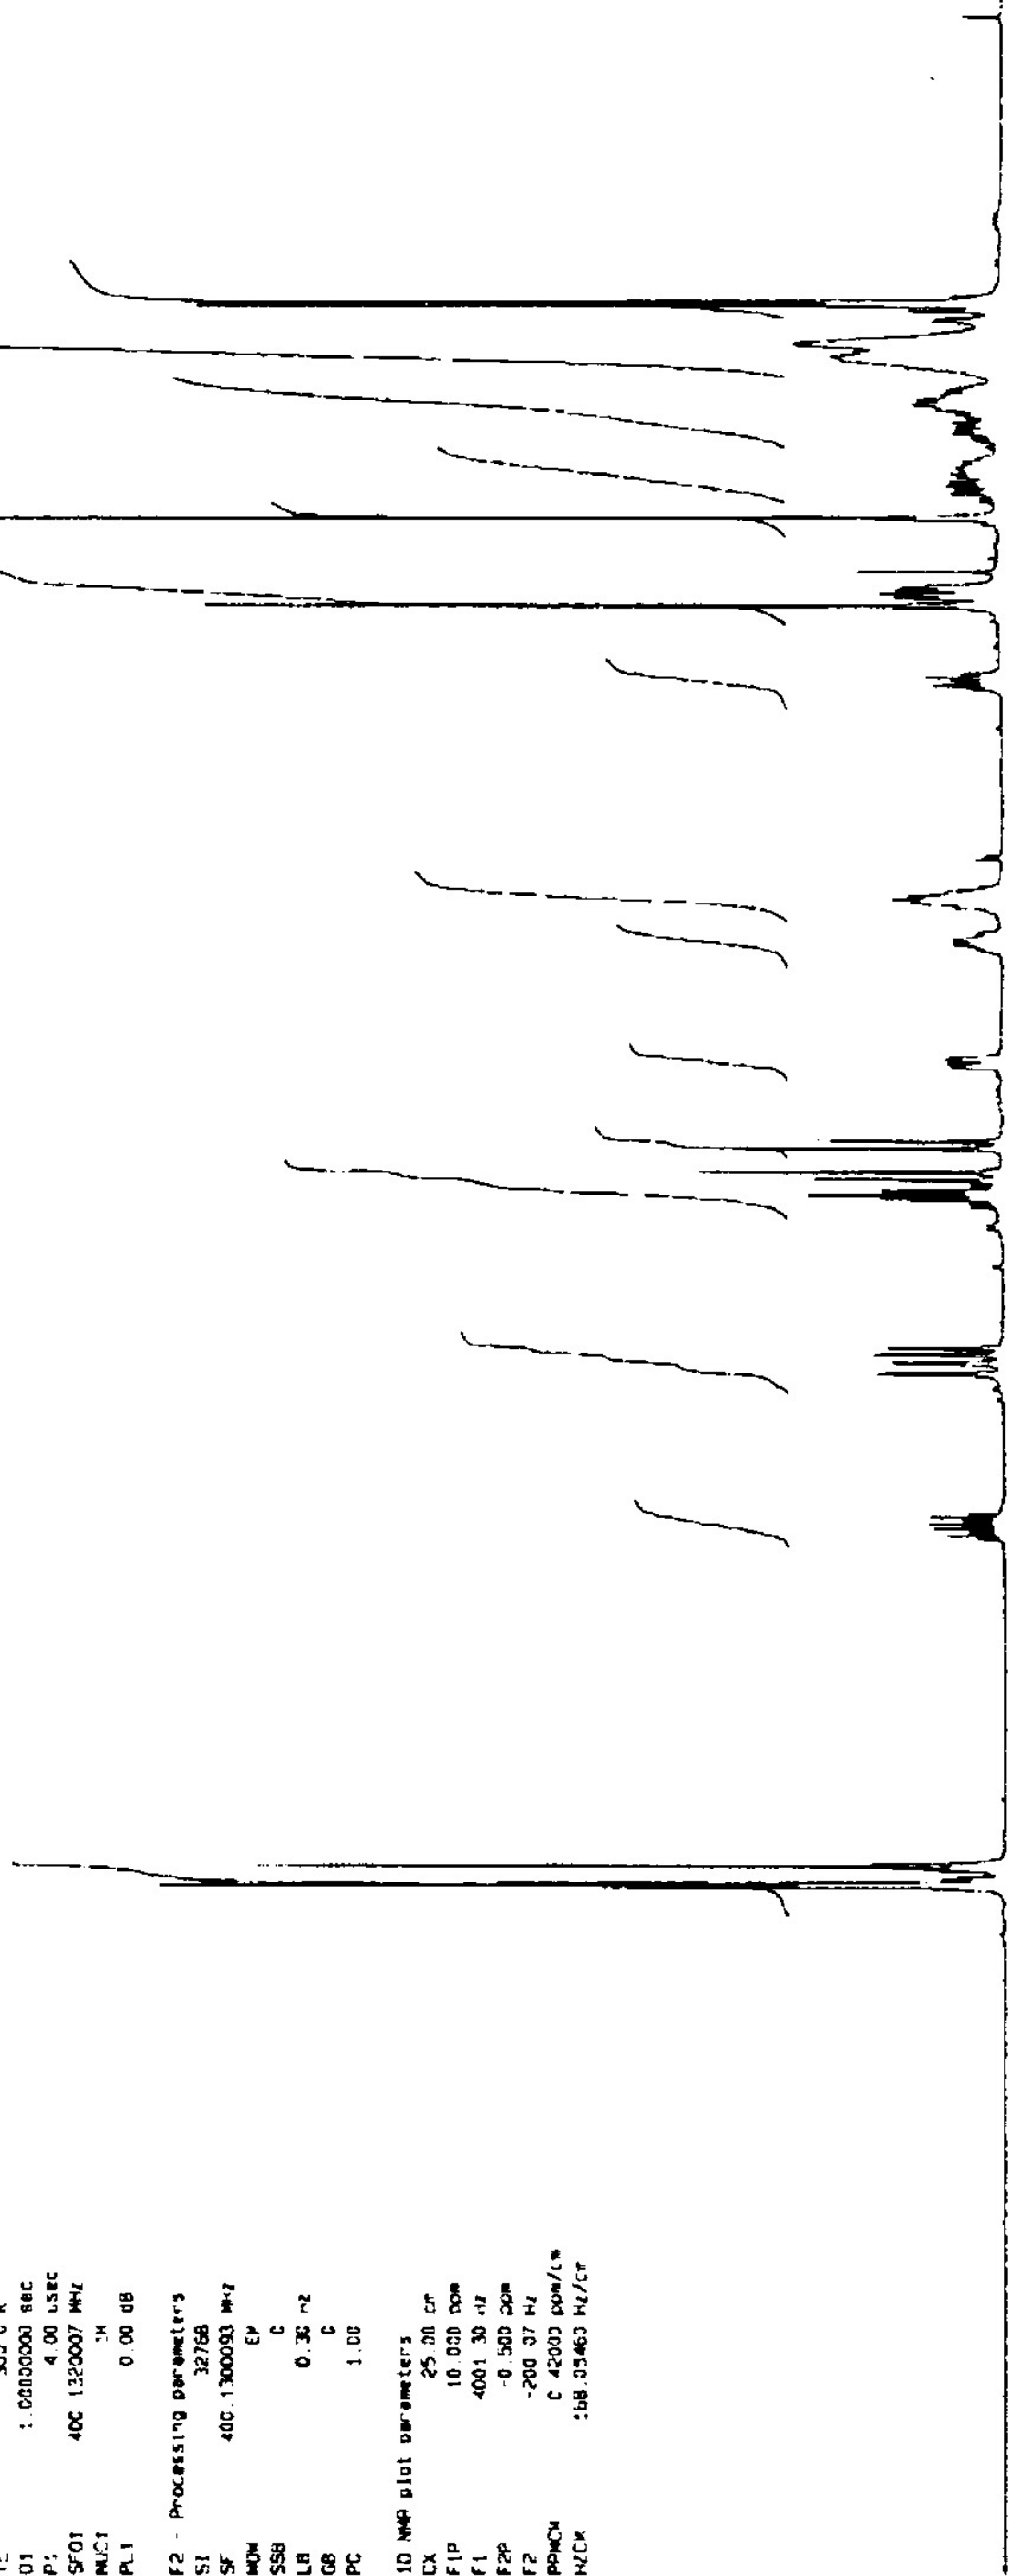

| Chemical Shift (ppm) | Integration |
|----------------------|-------------|
| 5.239                | 0.852       |
| 2.779                | 1.061       |
| 0.880                | 0.949       |
| 2.055                | 2.055       |
| 4.511                | 1.000       |
| 2.847                | 1.925       |
| 3.381                | 3.381       |
| 7.718                | 7.718       |
| 3.953                | 3.953       |

ppm 0 1 2 3 4 5 6 7 8 9

Current Data Parameters  
NAME 16-111-1890  
EXNO 9  
PROCNO 1

F2 - Acquisition Parameters  
Date 990209  
Time 6:35  
SPECTRUM  
PULPROG zgpg  
TD 32768  
SOLVENT C6D6  
NS 8596  
DS 0  
SWH 25125.825 Hz  
FIDRES 0.766773 Hz  
AQ 0.852132 sec  
RG 2048  
DM 19.900 uSAC  
DL 4.50 uSEC  
TE 300.0 K  
D11 0.0300000 sec  
PL12 17.00 dB  
C-ORIG2 mlev16  
PCPDZ 50.00 uSEC  
SF02 400.132007 MHz  
NUC2 1H  
PL2 17.00 dB  
DT 2.50000000 sec  
PI 4.00 uSEC  
SF01 100.6232933 MHz  
NUC1 13C  
PL1 0.00 dB

F2 - Processing parameters  
SI 32768  
SF 100.612750 MHz  
WDW EM  
SSB 0  
LB 1.00 Hz  
GB 0  
PC 1.00

F0 Hetero dit parameters  
CX 25.00 cm  
F1P 200.000 ppm  
F1 20122.55 Hz  
F2P 0.000 ppm  
F2 0.00 Hz  
P1PDM 8.00000 ppm/cm  
F2CY 804.90322 Hz/cm

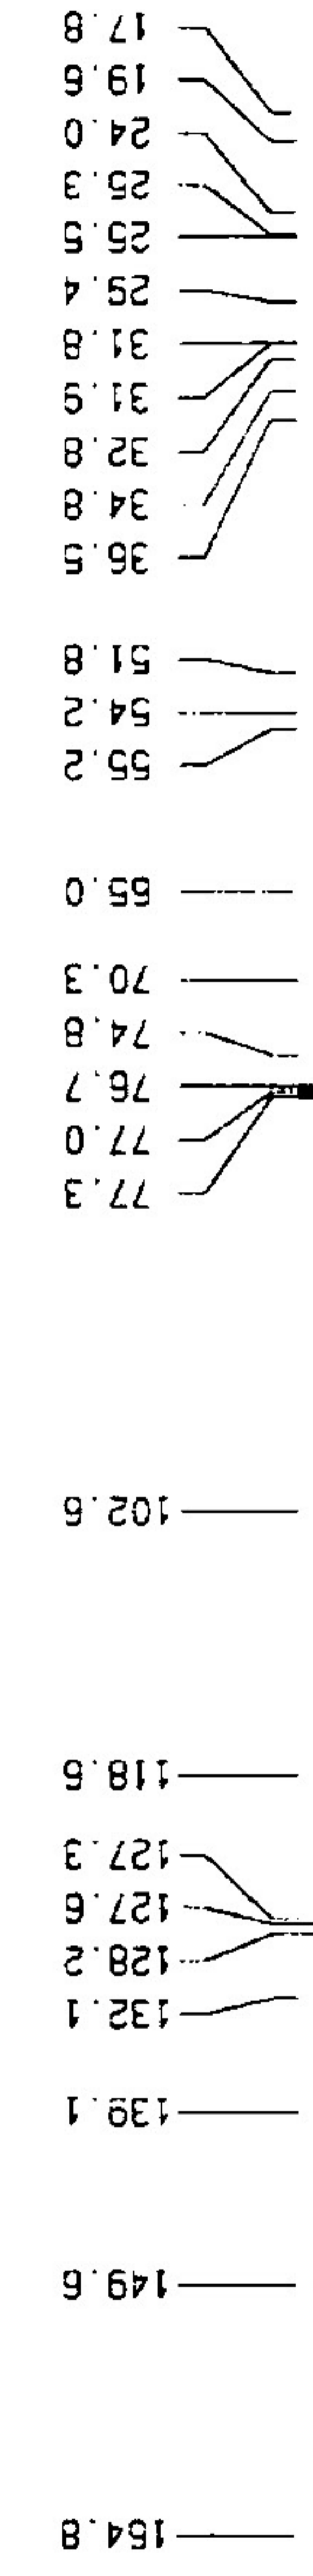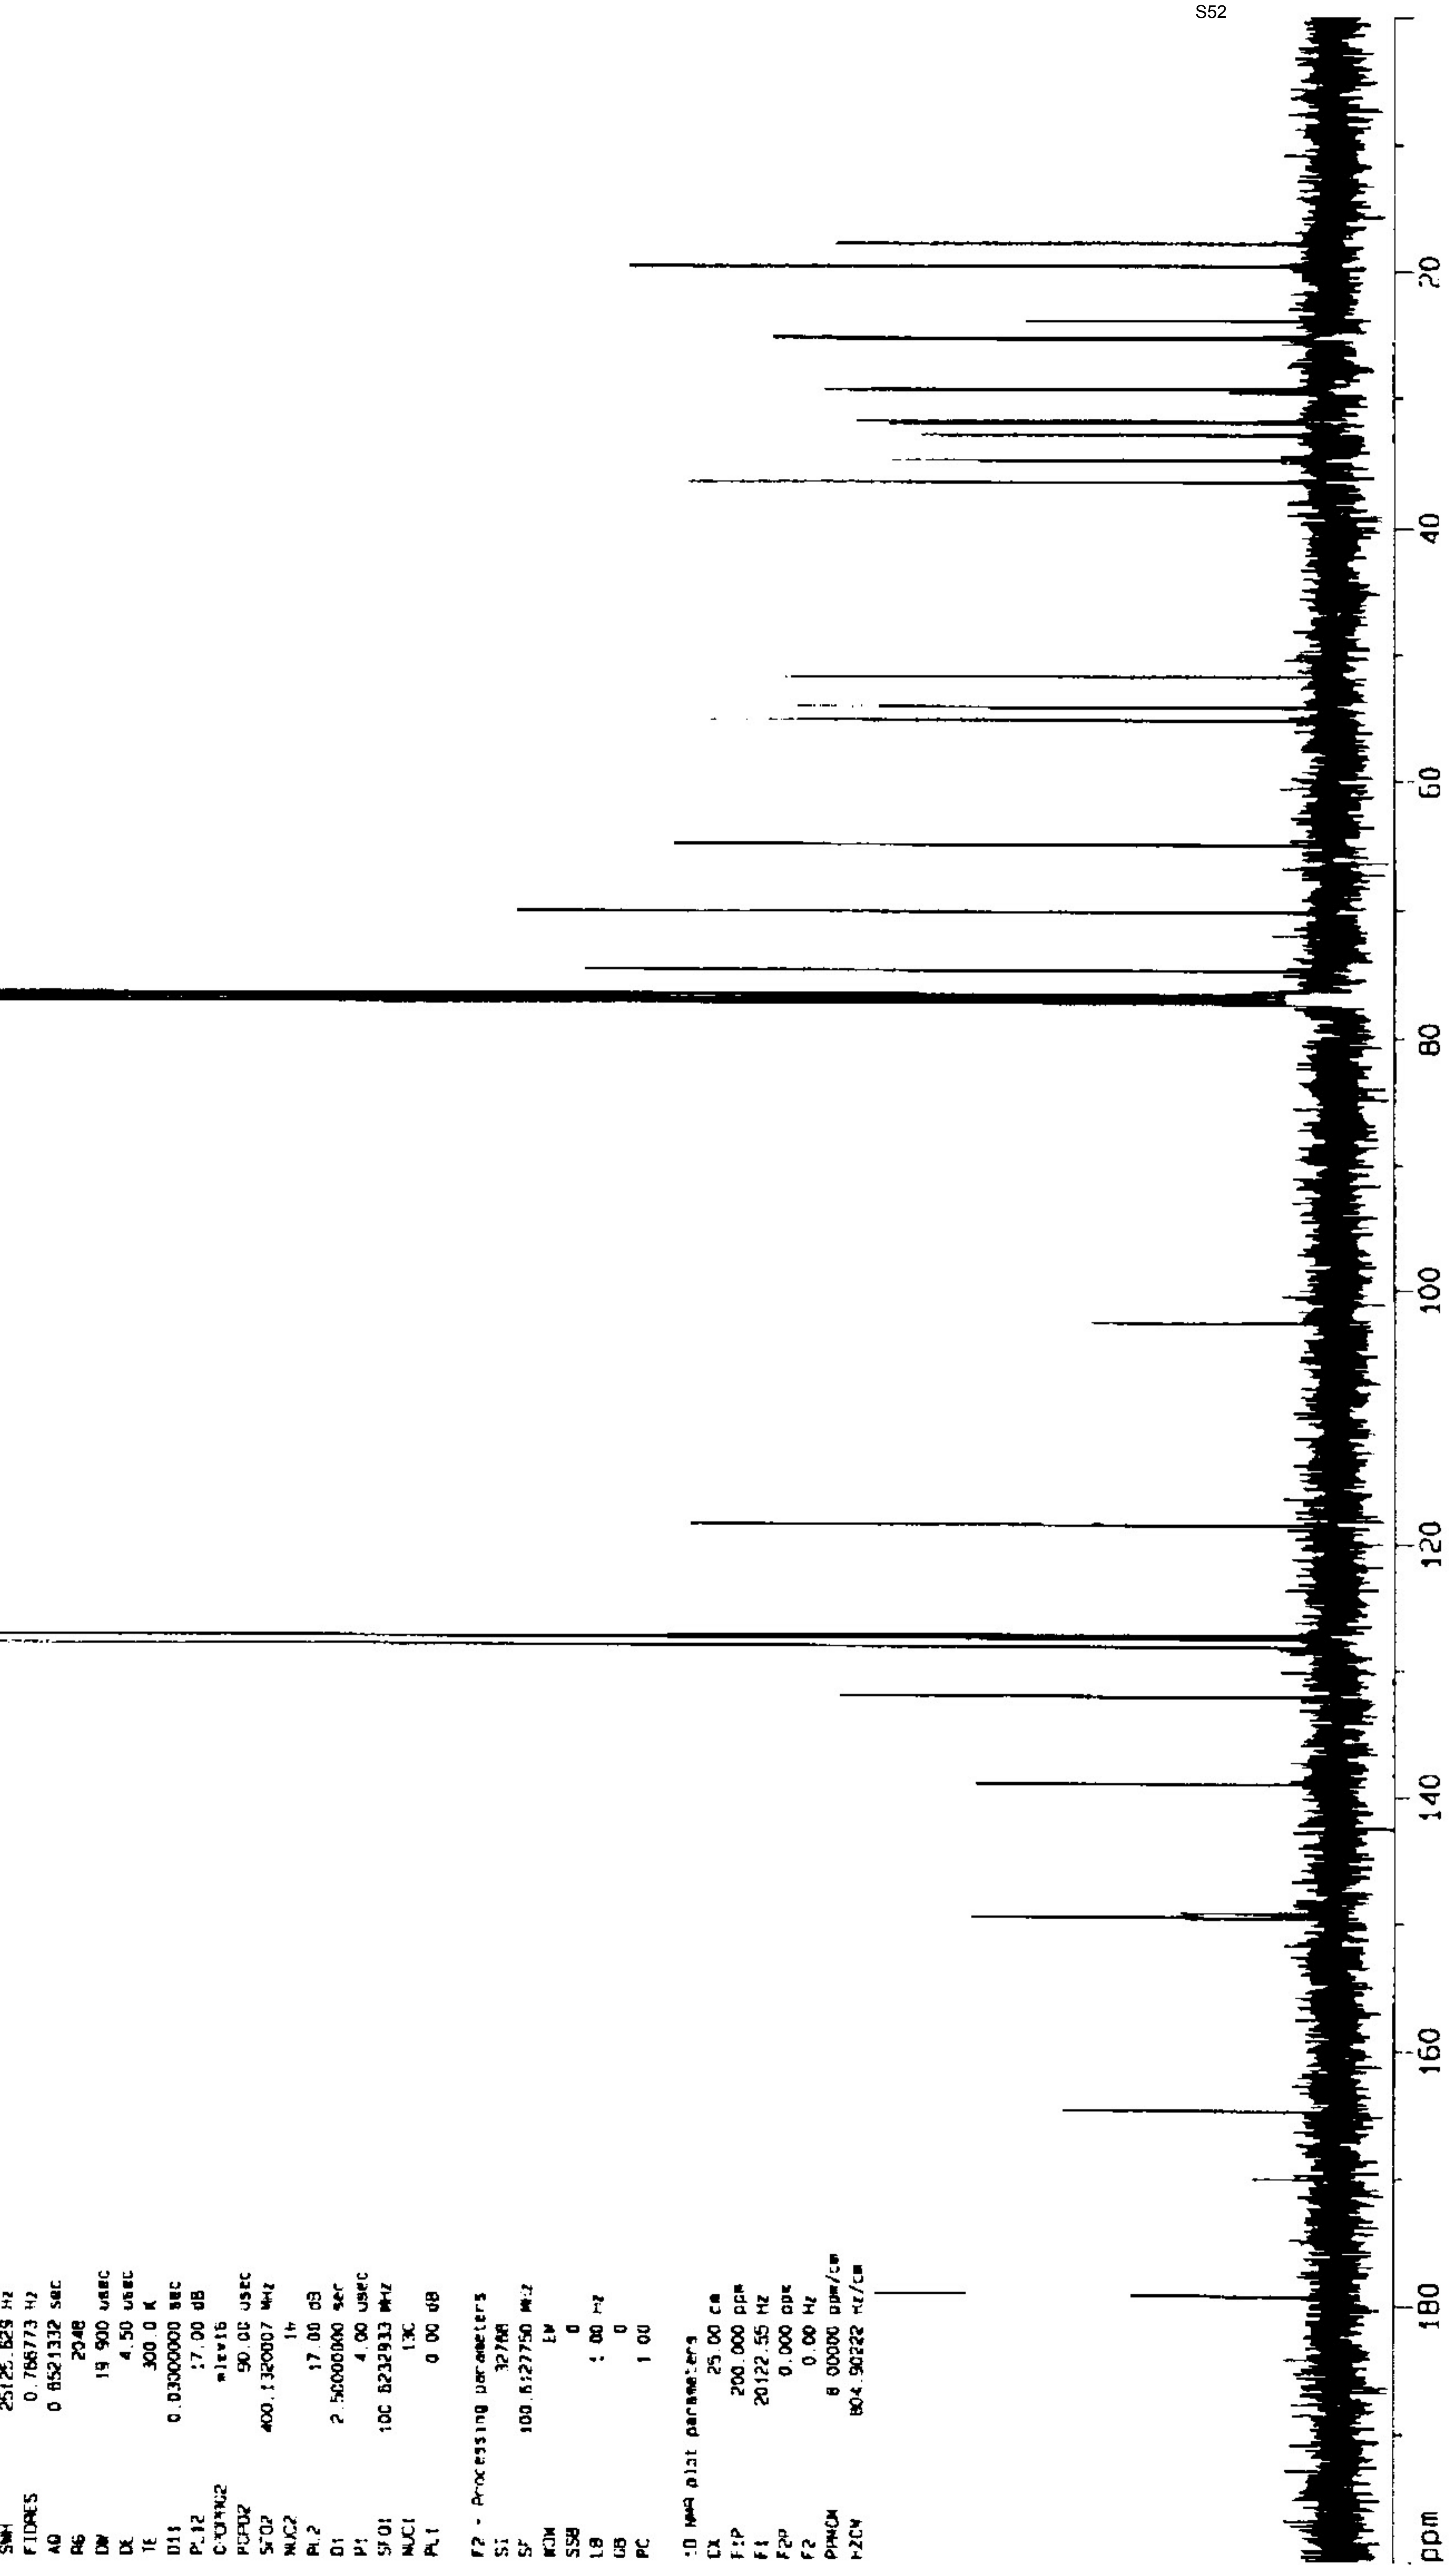

Current Data Parameters  
 NAME FC-111-241  
 EXPNO 10  
 PRCCNO 1

F2 - Acquisition Parameters

Date\_ 990315  
 Time\_ 8.50  
 INSTRUM spect  
 PROCNO 5  
 PULPROG zg  
 TC 32768  
 SOLVENT CDCl3  
 NS 16  
 DS 2  
 SWH 6009.615 Hz  
 FIDRES 0.163399 Hz  
 AQ 2.7263477 sec  
 RG 574.7  
 DM 83.200 usec  
 DE 6.00 usec  
 TE 300.0 K  
 O1 1.00000000 sec  
 P1 4.00 usec  
 SF01 499.8924995 MHz  
 NUC1 1H  
 PL1 0.00 g3

F2 - Processing parameters

SI 32768  
 SF 499.8900000 MHz  
 WCW 3M  
 SSB 0  
 LB 0.30 Hz  
 GB 0  
 PC 1.00

1D NMR plot parameters

CX 25.00 cm  
 F1 10.000 ppm  
 F1 4998190 Hz  
 F2 -0.500 ppm  
 F2 -249.95 Hz  
 PPM0 0.42000 ppm/cm  
 HZ0 209.95391 Hz/cm

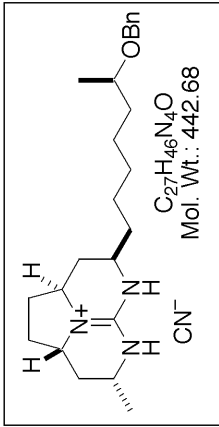

S53

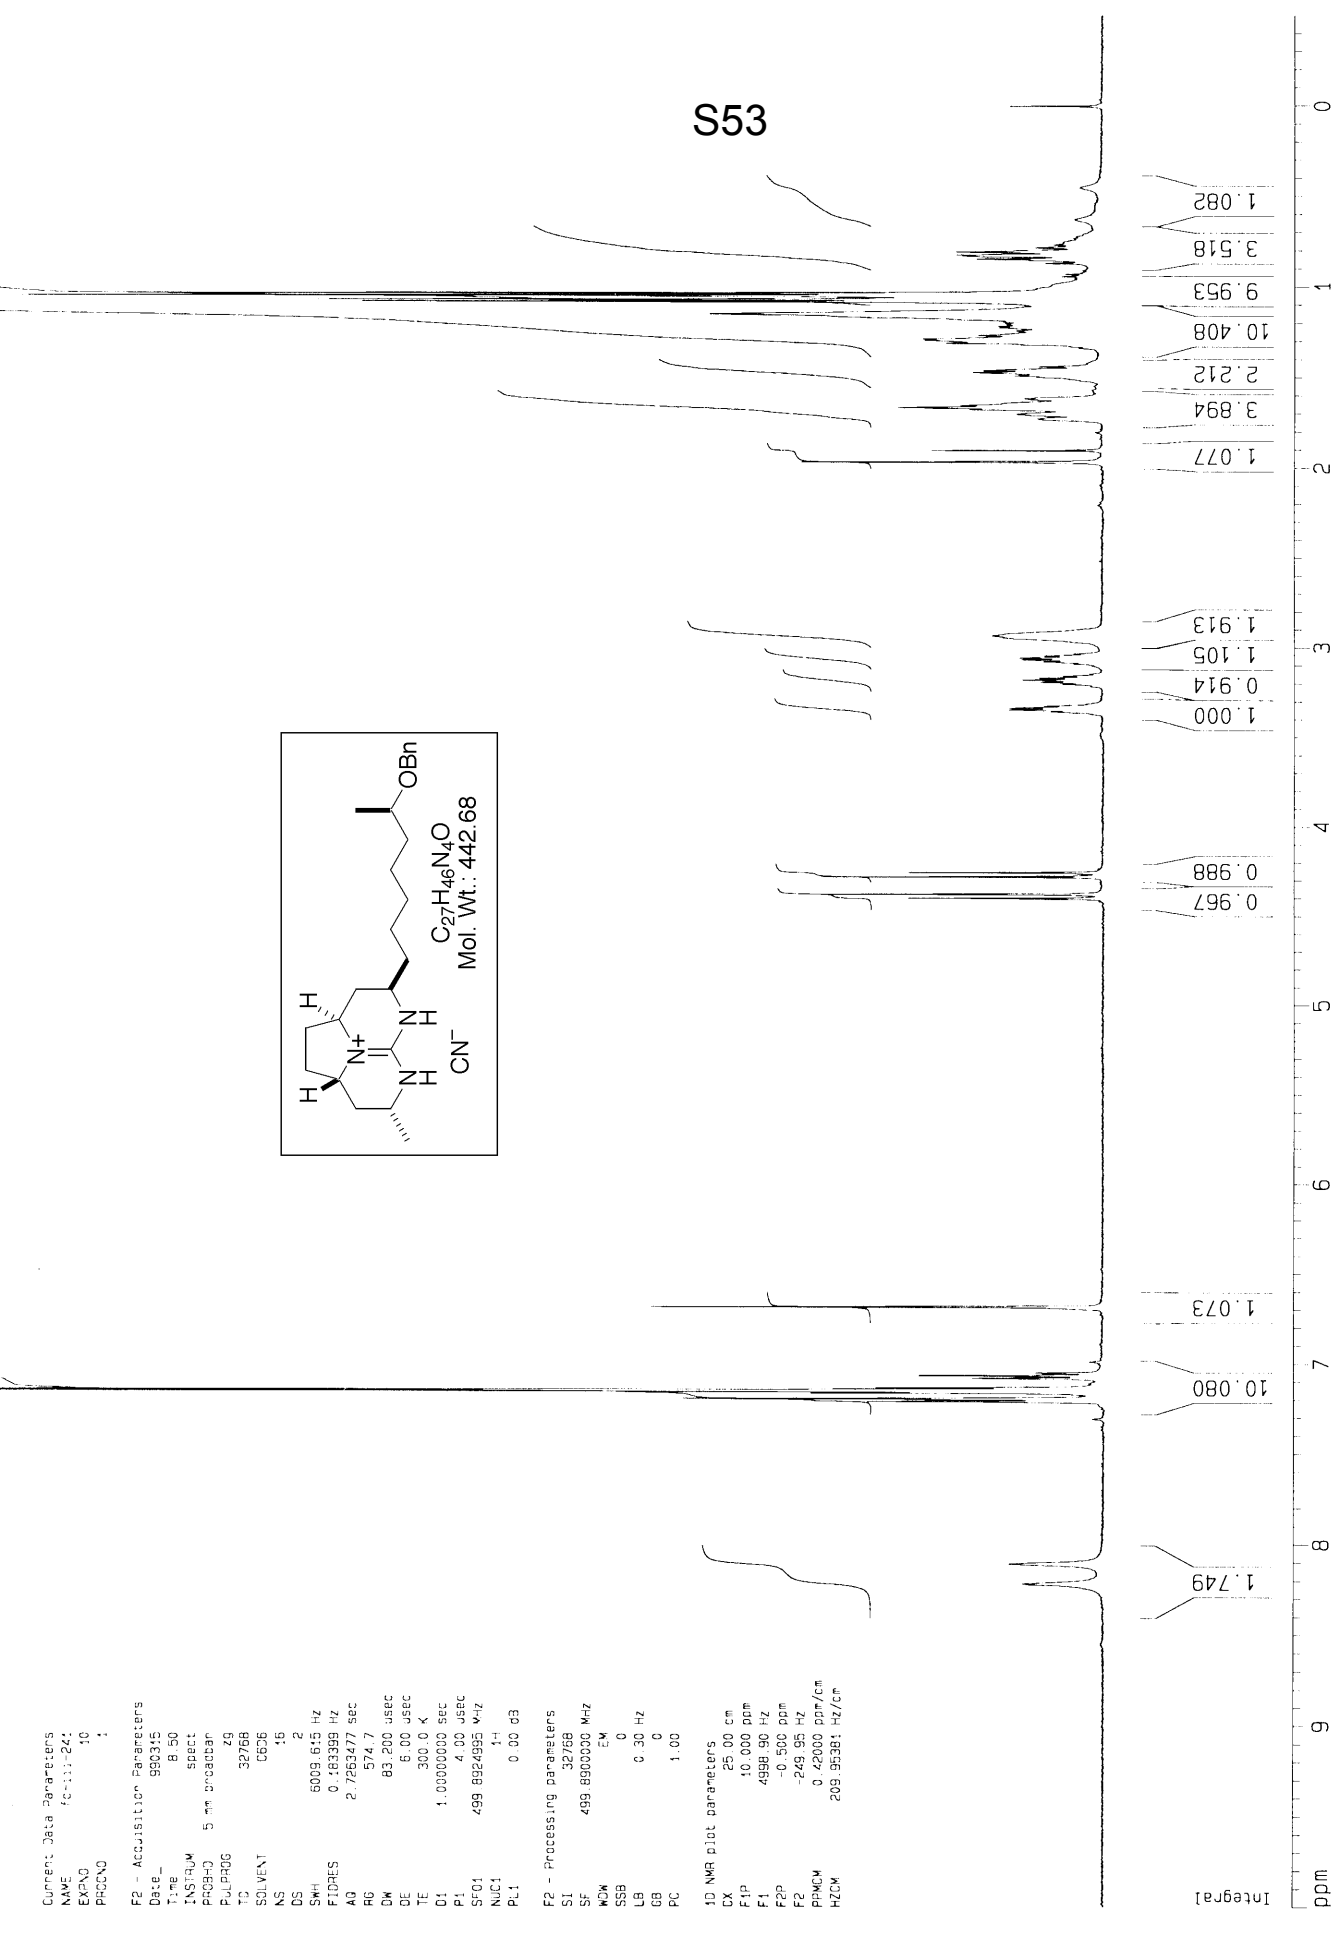

Integral

ppm



# S54

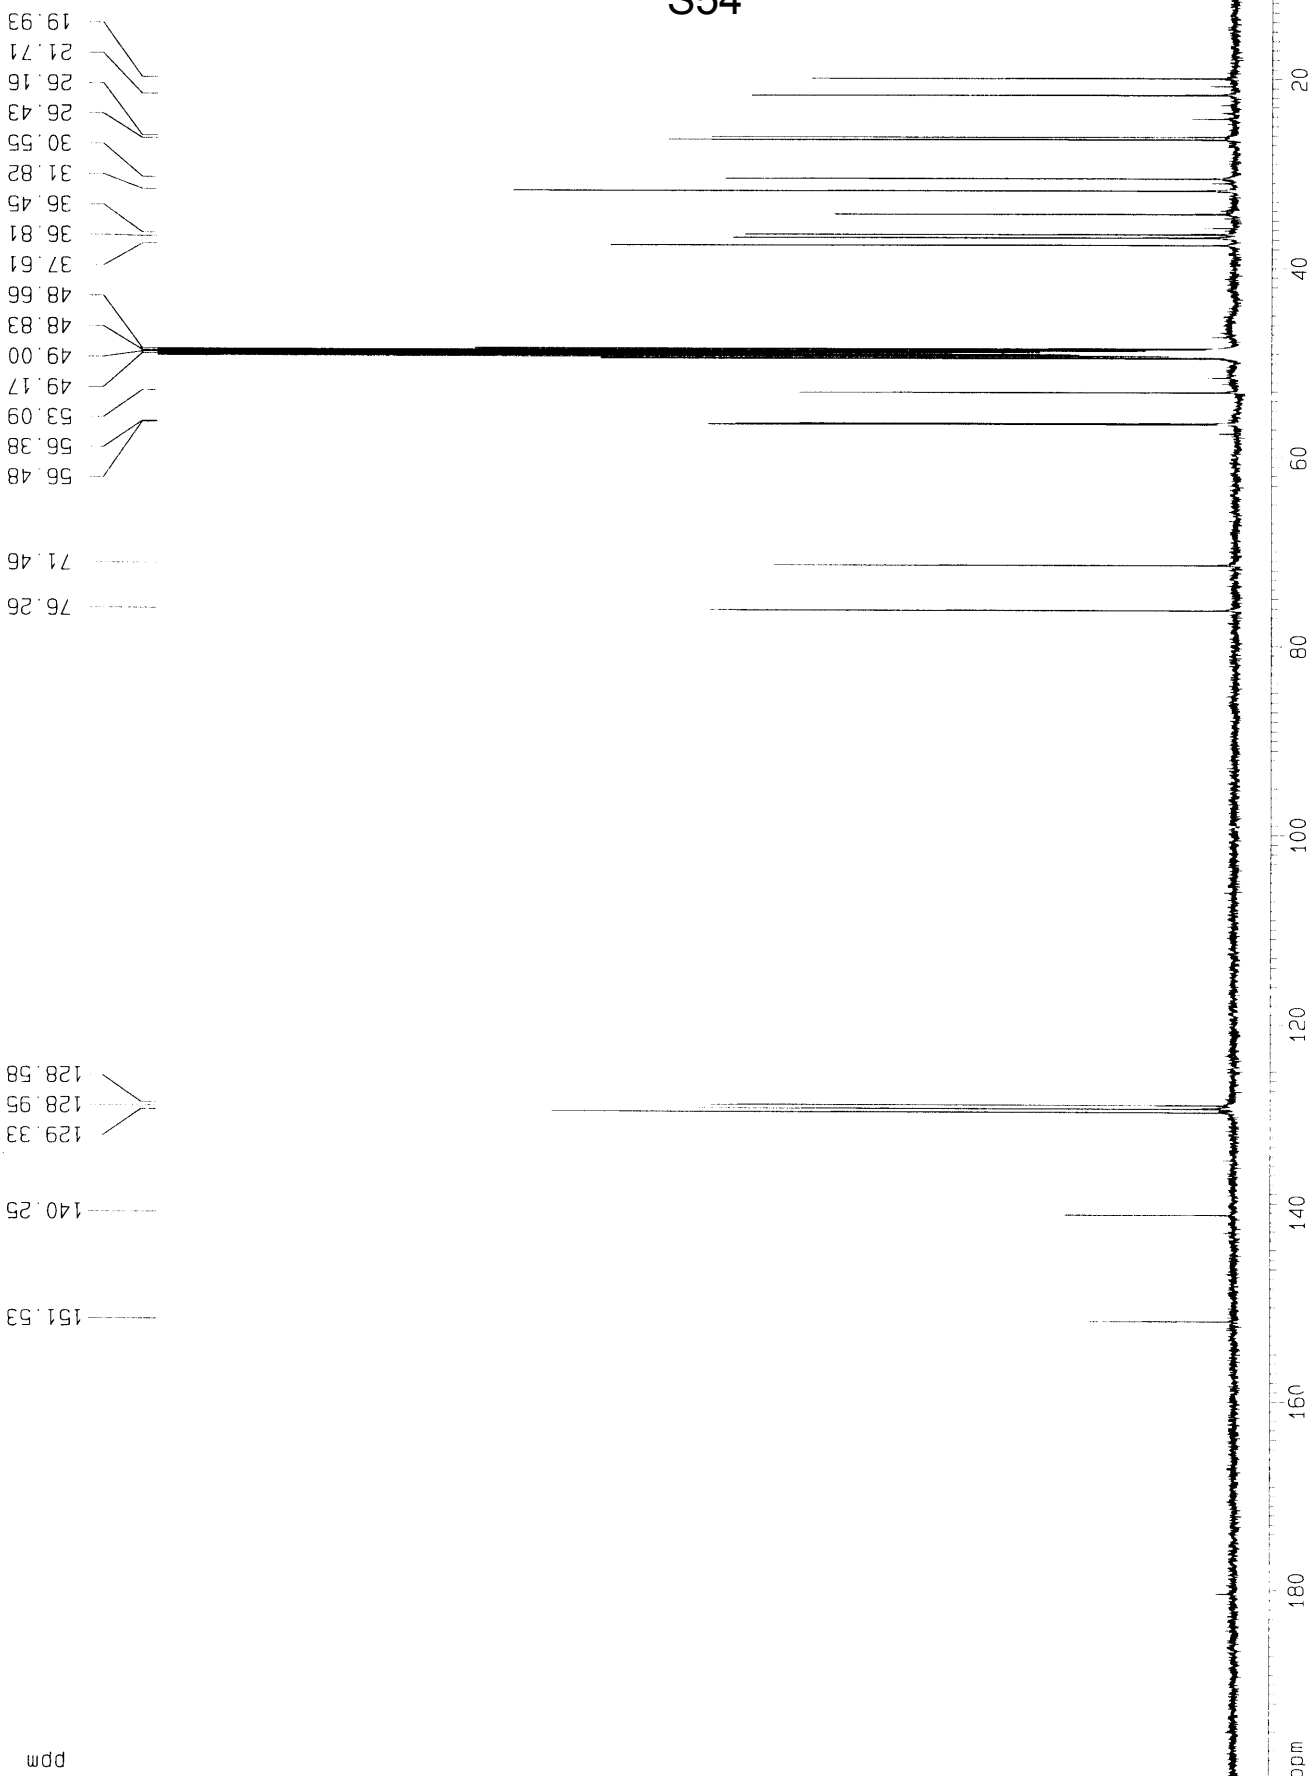

Current Data Parameters  
NAME fc-111-2816  
EXPNO 1  
PROCNO 1

F2 - Acquisition Parameters  
Date\_ 990427  
Time 10.08  
INSTRUM spect  
PROBHD 5 mm DNP 1H  
PULPROG zg  
TD 16384  
SOLVENT CDCl3  
NS 16  
DS 2  
SWH 4789.272 Hz  
FIDRES 0.292314 Hz  
AQ 1.7105396 sec  
RG 724.1  
Dw 104.400 usec  
DE 4.50 usec  
TE 300.0 K  
D1 1.0000000 sec  
F1 4.00 usec  
SFO1 400.1320007 MHz  
NUC1 1H  
PL1 0.00 dB

F2 - Processing parameters  
SI 32768  
SF 400.1300114 MHz  
MUM EM  
SSB 0  
LB 0.30 Hz  
GB 0  
PC 1.00

1D NMR plot parameters  
CA 25.00 cm  
F1P 10.000 usec  
F1 4001.30 Hz  
F2P -0.500 usec  
F2 -200.07 Hz  
PPHMX 0.42000 ppm/cm  
NACM 188.05460 Hz/cm

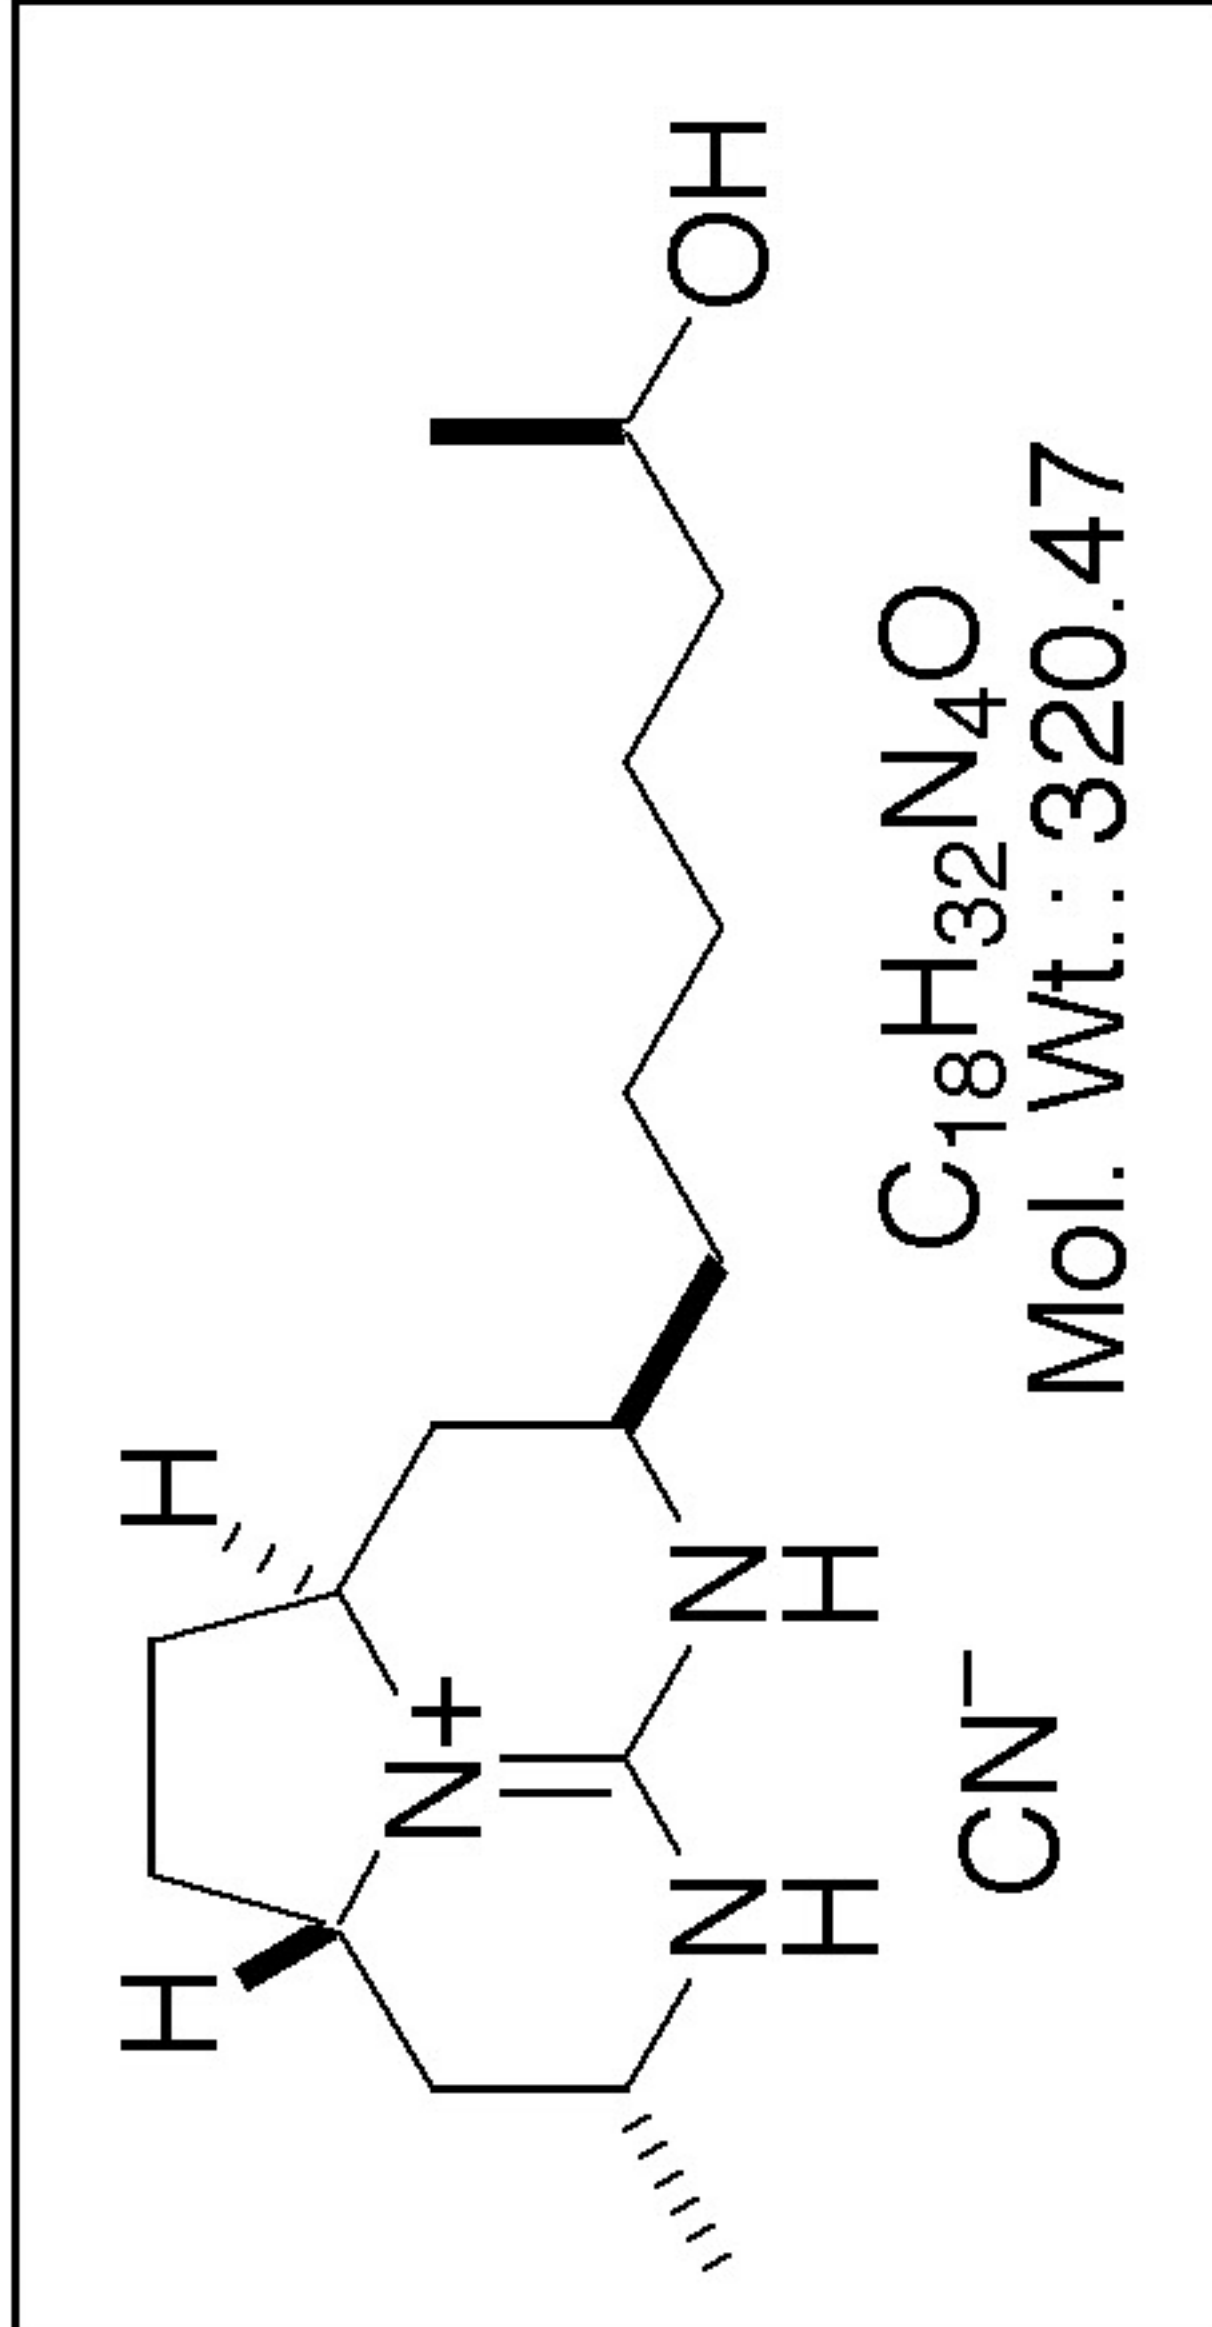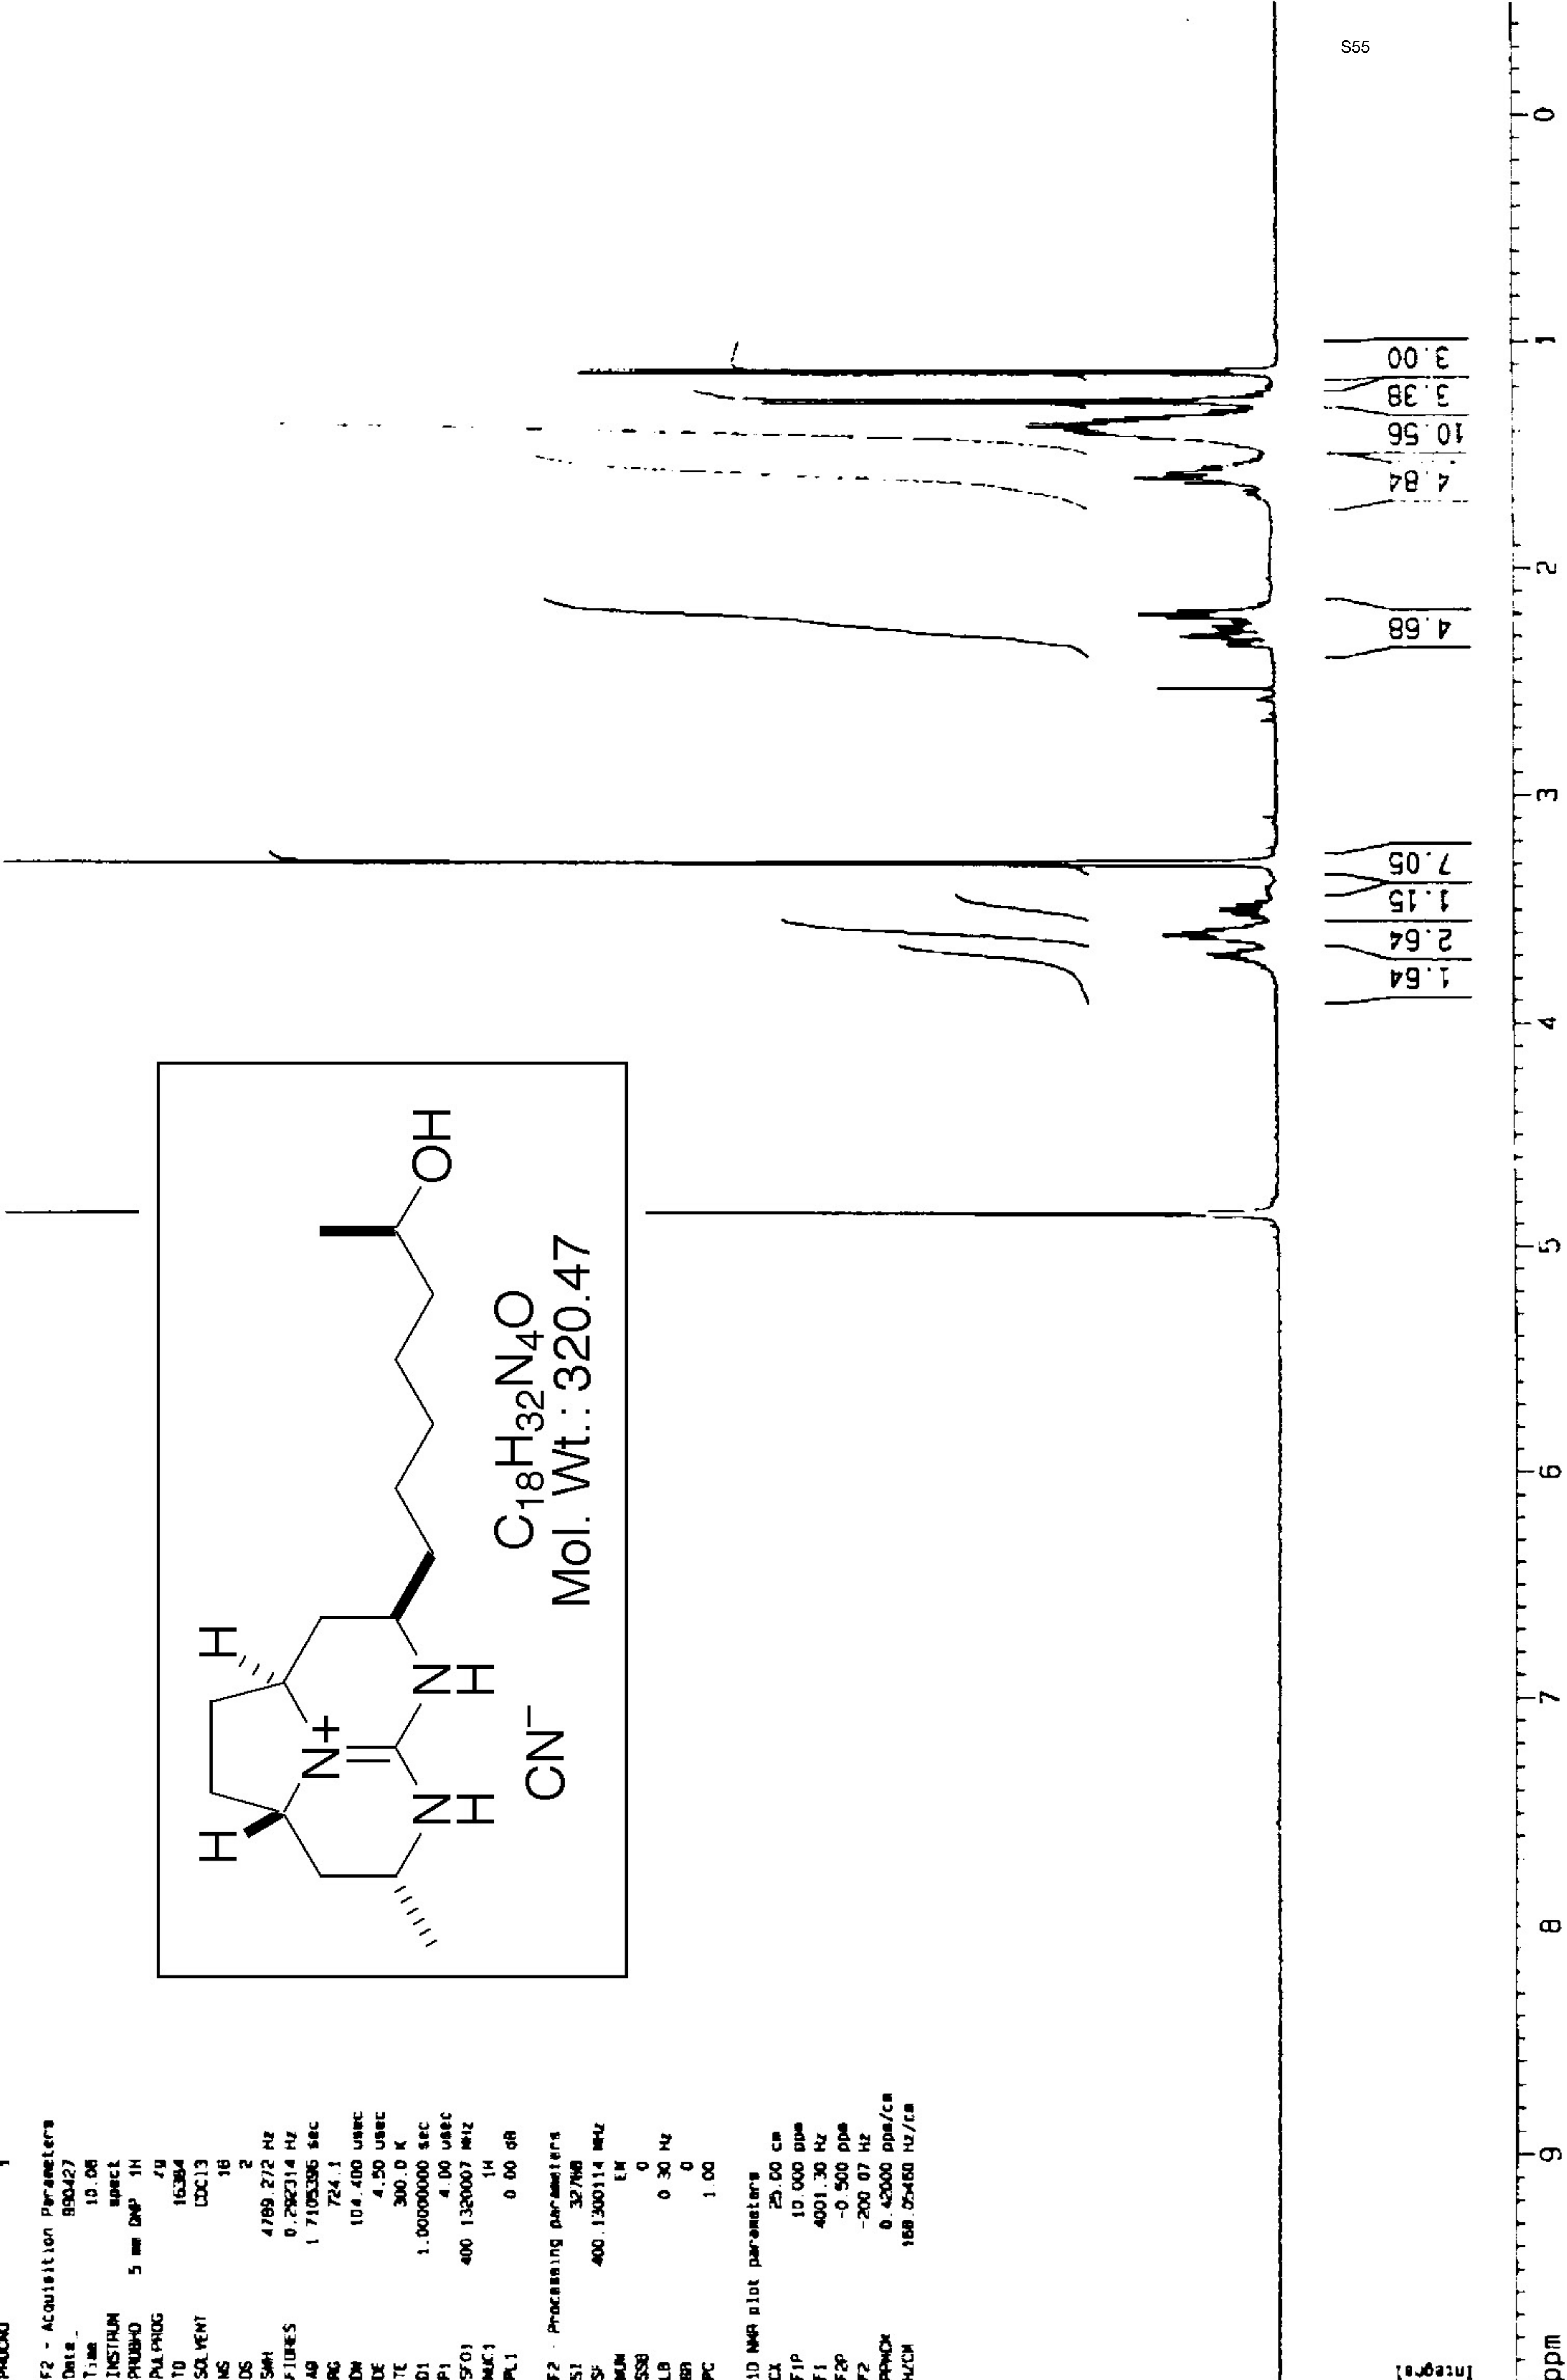

Integral

ppm

21.68  
23.54  
26.16  
26.70  
30.60  
31.82  
34.29  
36.77  
40.01  
48.82  
49.00  
49.17  
49.34  
53.07  
56.34  
68.45

151.54

Current Data Parameters  
NAME fc-111-286  
EXPNO 3  
PROCNO 1

F2 - Acquisition Parameters

Date\_ 990427  
Time 13.47  
INSTRUM spect  
PROBHD 5 mm broadband  
PULPROG zgdc  
TD 32768  
SOLVENT C5D6  
NS 627  
DS 0  
SWH 31446.541 Hz  
FIDRES 0.959672 Hz  
AQ 0.5210612 sec  
RG 2048  
DM 15.900 usec  
DE 4.50 usec  
TE 300.0 K  
D11 0.0300000 sec  
PL12 15.00 dB  
CPOPHG2 waltz16  
PCPD2 79.50 usec  
SF02 499.8924995 MHz  
NUC2 1H  
PL2 120.00 dB  
D1 2.0000000 sec  
P1 3.00 usec  
SF01 125.7105882 MHz  
NUC1 13C  
PL1 0.00 dB

F2 - Processing parameters

S1 16384  
SF 125.6972680 MHz  
WDW EM  
SSB 0  
LB 1.00 Hz  
GB 0  
PC 1.00

1D NMR plot parameters

CX 25.00 cm  
F1P 200.000 ppm  
F1 25139.45 Hz  
F2P 0.000 ppm  
F2 0.00 Hz  
PPHCH 8.00000 ppm/cm  
HZCM 1005.57812 Hz/cm

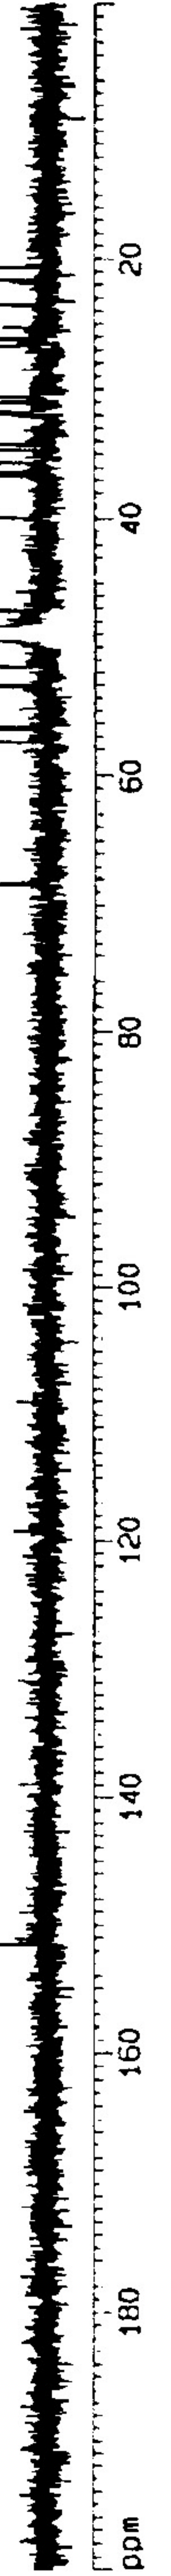

Current Data Parameters  
NAME fc-111-216  
EXPNO 2  
PROCNO 1

F2 - Acquisition Parameters

Date\_ 990402  
Time 15 25  
INSTRUM spect  
PROBHD 5 mm Broadband  
PULPROG zg  
TU 32768  
SOLVENT CDCl3  
NS 16  
DS 2  
SWH 6009.615 Hz  
FIDRES 0.163399 Hz  
AQ 2.7263477 sec  
RG 128  
DI 83.200 usec  
DE 5.00 usec  
TE 300.0 K  
D1 1.00000000 sec  
P1 4.00 usec  
SFO1 499.8924995 MHz  
NUC1 1H  
PL1 0.00 dB

F2 - Processing parameters

SI 32768  
SF 499.8924995 MHz  
NUC1 1H  
SSB 0  
LB 0.30 Hz  
GB 0  
PC 1.00

1D NMR plot parameters

CX 25.00 cm  
F1P 10.000 ppm  
F1 4998.90 Hz  
F2P -0.300 ppm  
F2 -249.95 Hz  
PPM0 0.42000 ppm/cm  
HZ0 209.95361 Hz/cm

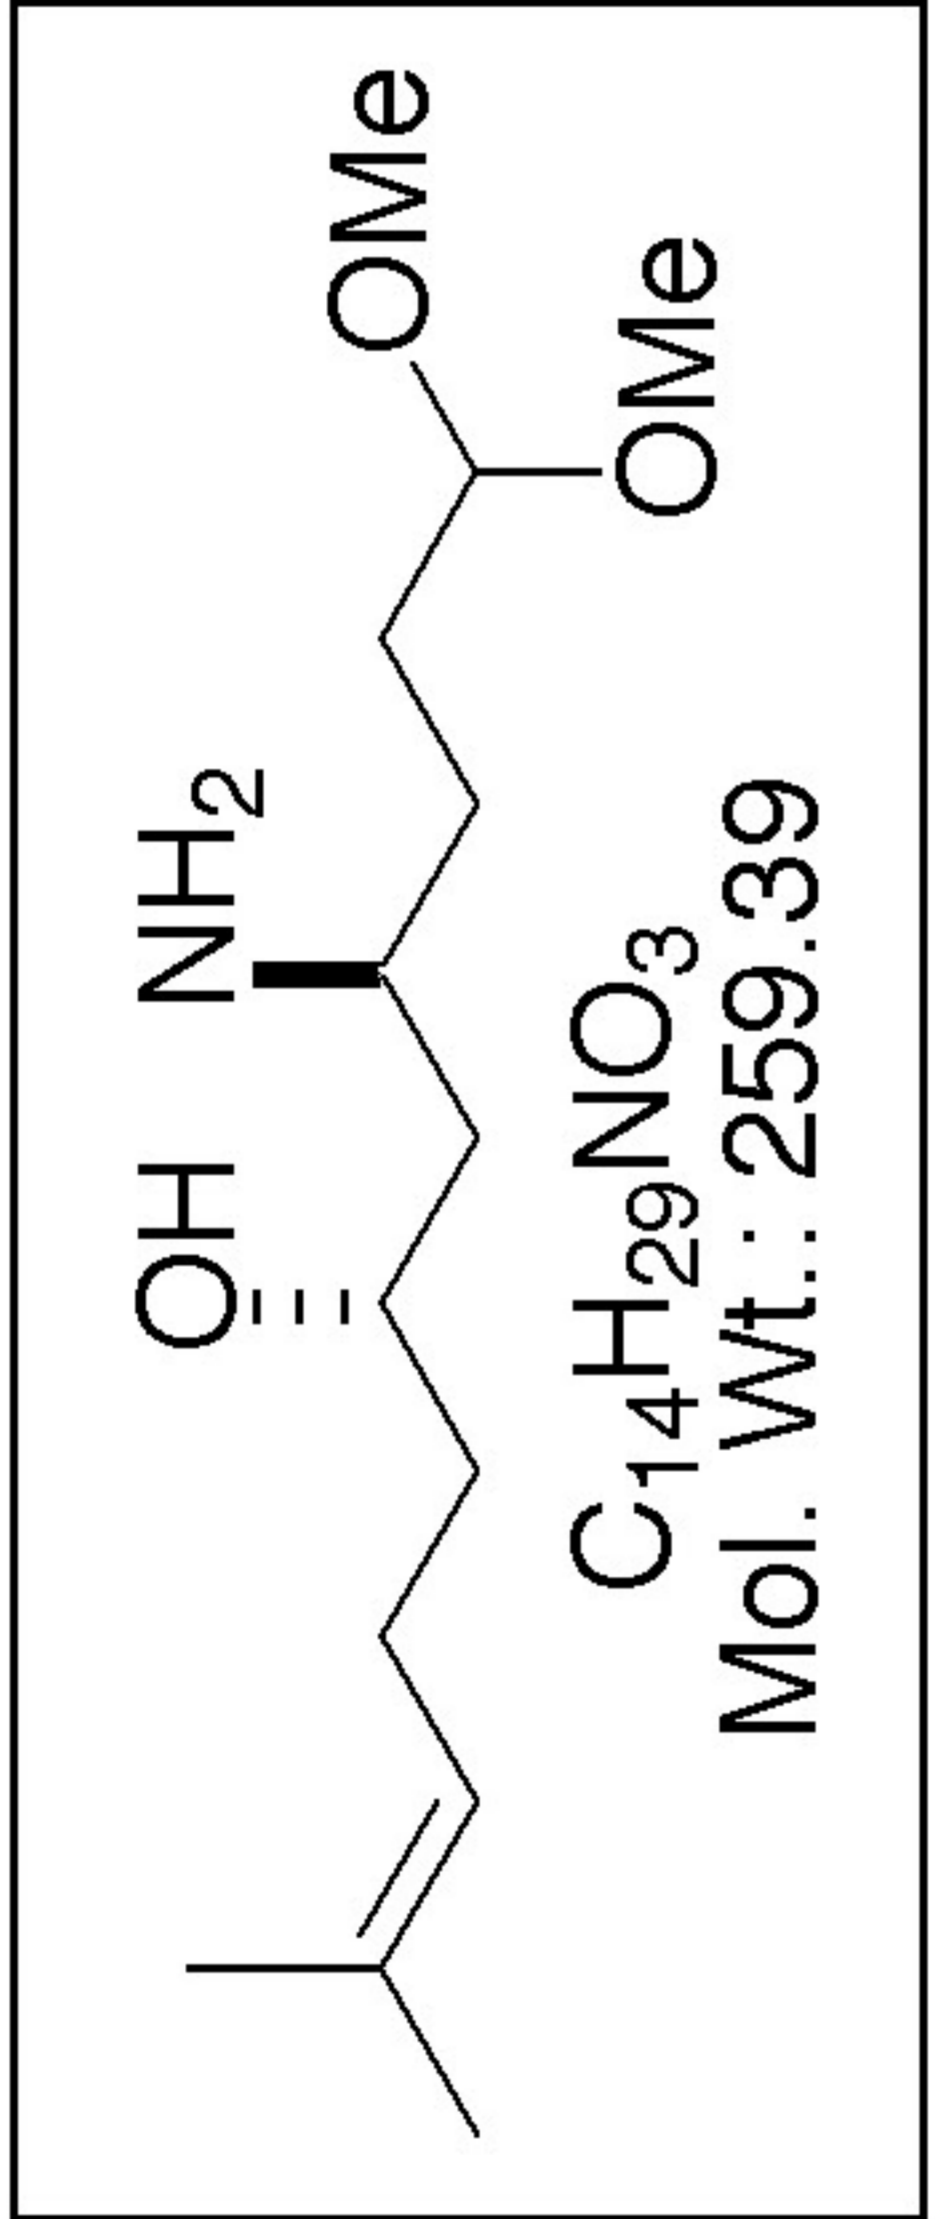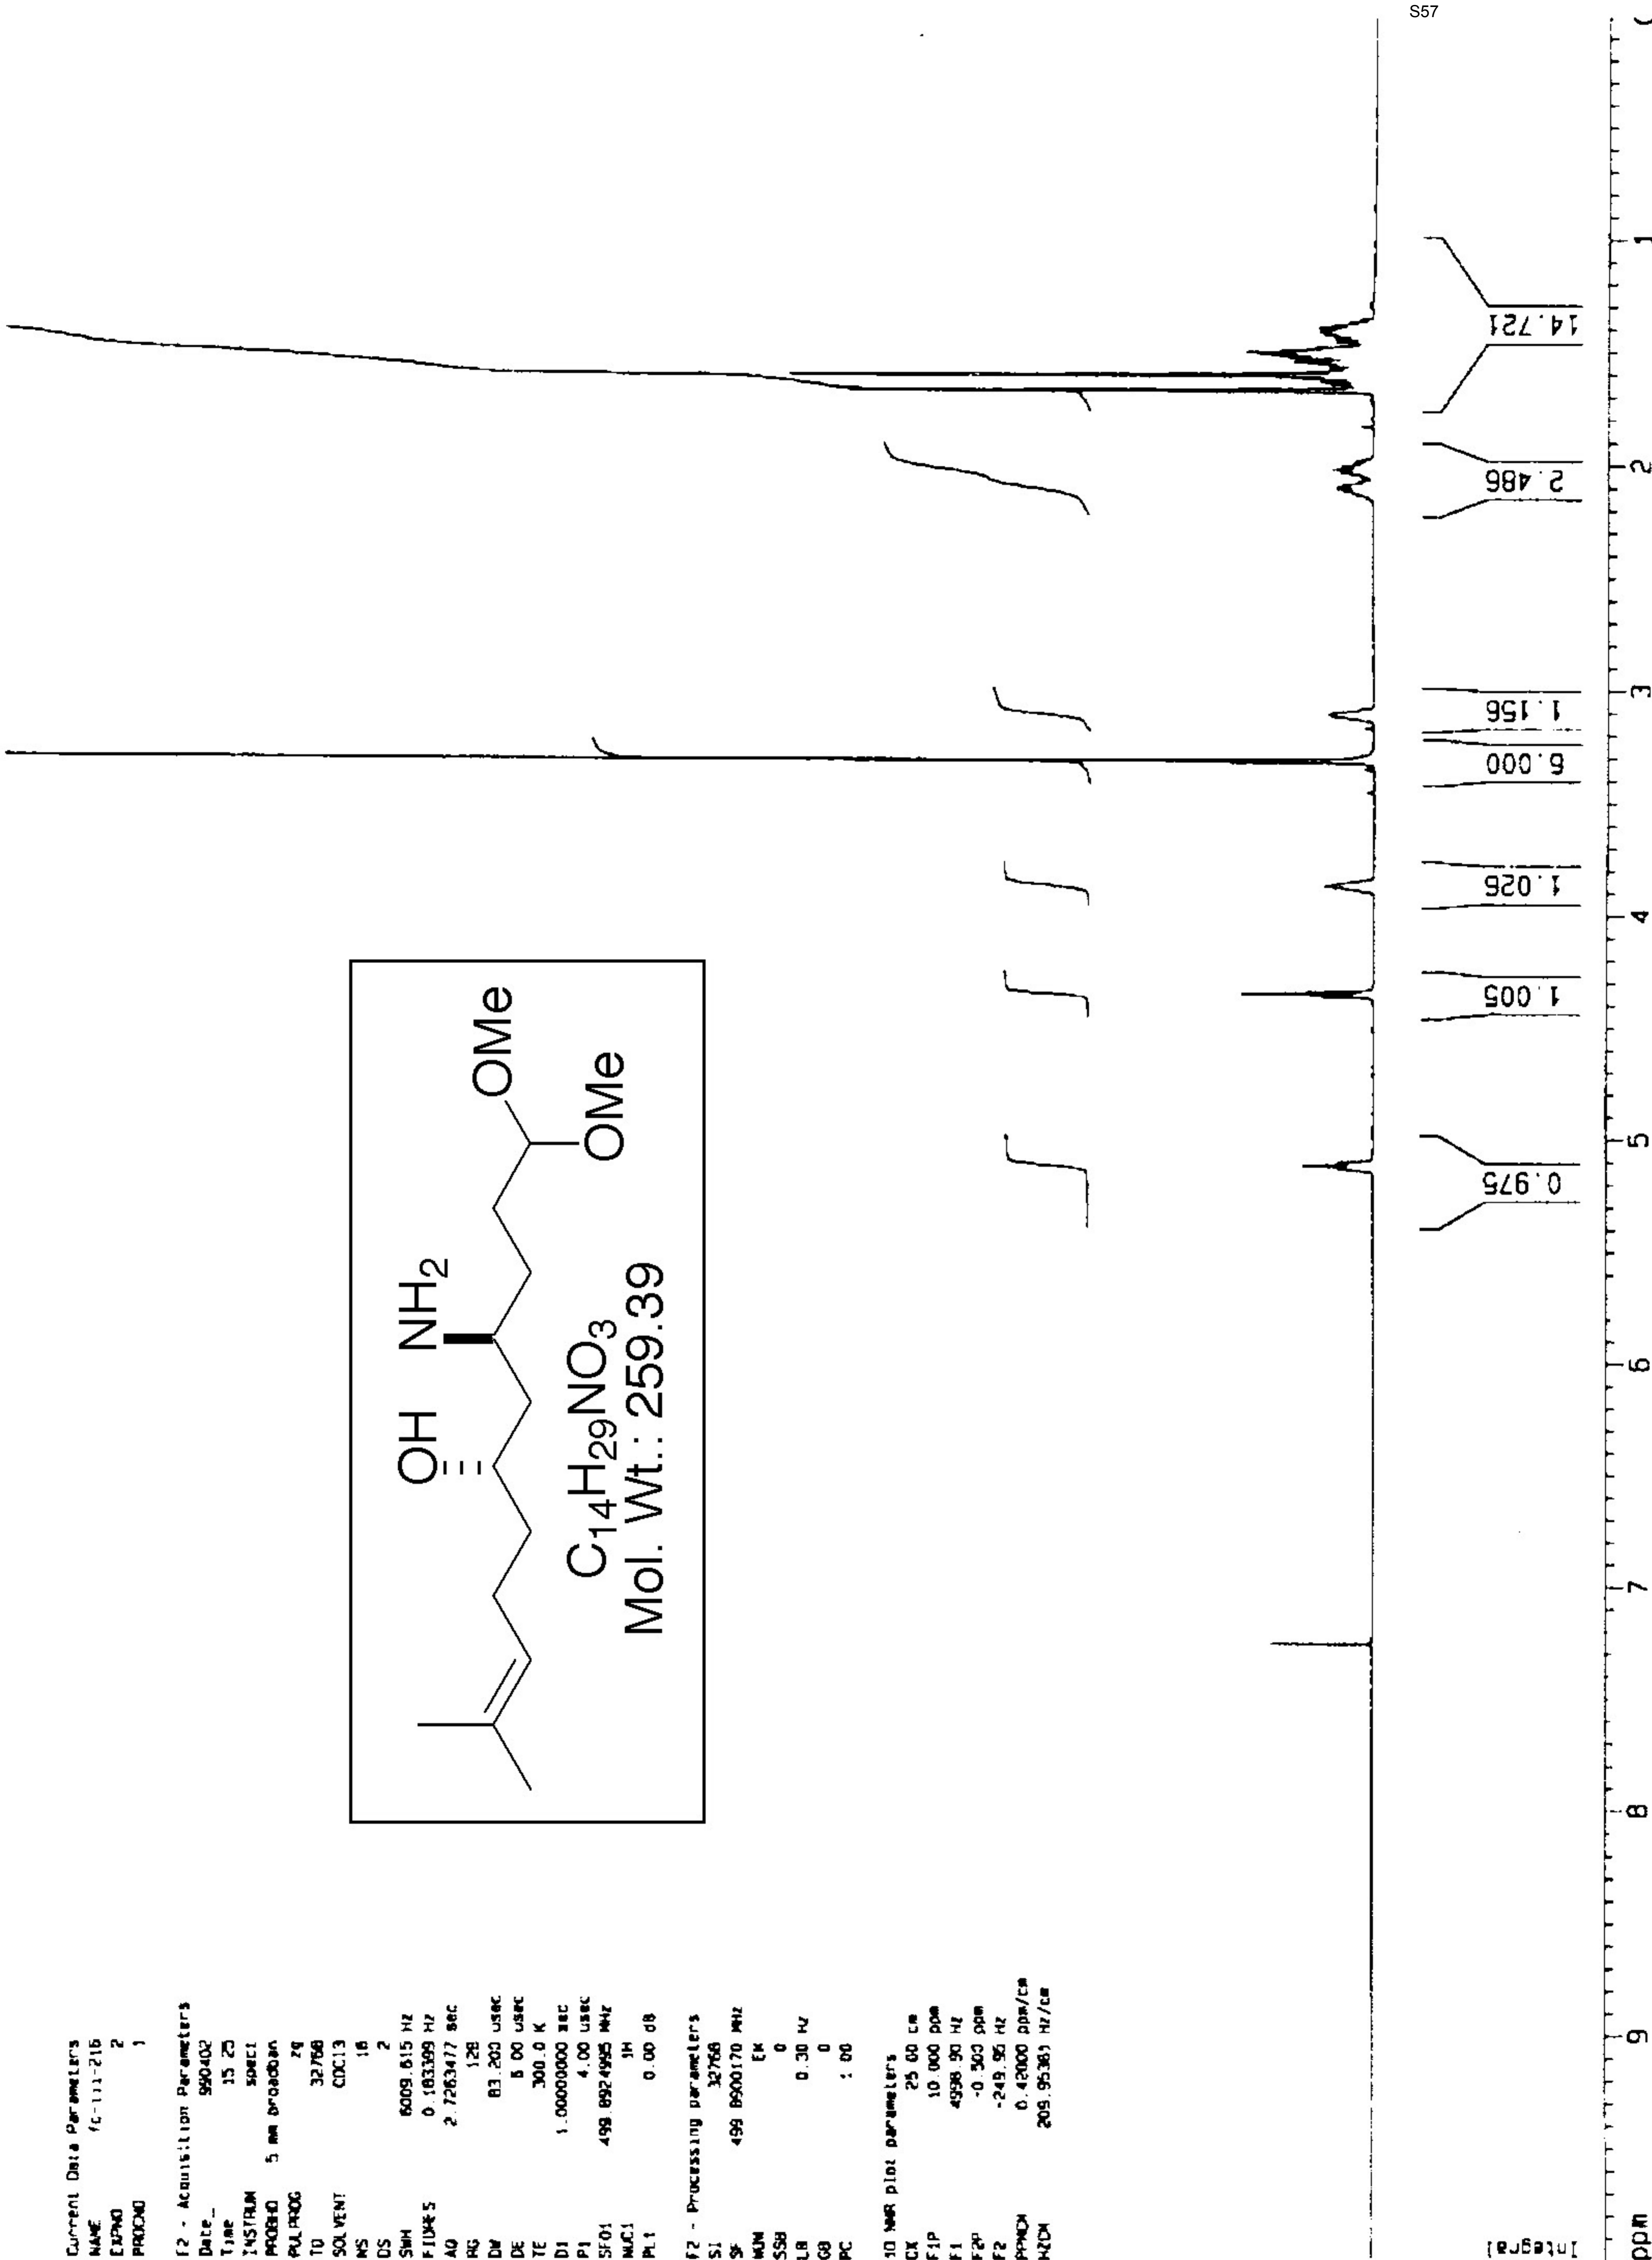

Current Data Parameters  
 NAME fc-111-216  
 EXPNO 3  
 PROCNO 1

F2 - Acquisition Parameters

Date\_ 990402  
 Time 15.47  
 INSTRUM spect  
 PROBHD 5 mm broadband  
 PULPROG zgdc  
 TD 32768  
 SOLVENT C6D6  
 NS 503  
 DS 0  
 SWH 31446.541 Hz  
 FIDRES 0.959672 Hz  
 AQ 0.5210612 sec  
 RG 2896.3  
 DM 15.900 usec  
 DE 4.50 usec  
 TE 300.0 K  
 D11 0.0300000 sec  
 PL12 15.00 dB  
 CPDPRG2 waltz16  
 PCPD2 79.50 usec  
 SF02 499.8924995 MHz  
 NUC2 1H  
 PL2 120.00 dB  
 D1 2.0000000 sec  
 P1 3.00 usec  
 SF01 125.7105882 MHz  
 NUC1 13C  
 PL1 0.00 dB

F2 - Processing parameters

SI 16384  
 SF 125.6974470 MHz  
 HDM EM  
 SSB 0  
 LB 1.00 Hz  
 GB 0  
 PC 1.00

1D NMR plot parameters

CX 25.00 cm  
 F1P 200.000 ppm  
 F1 25139.49 Hz  
 F2P 0.000 ppm  
 F2 0.00 Hz  
 PPMCH 8.00000 ppm/cm  
 HZCH 1005.57959 Hz/cm

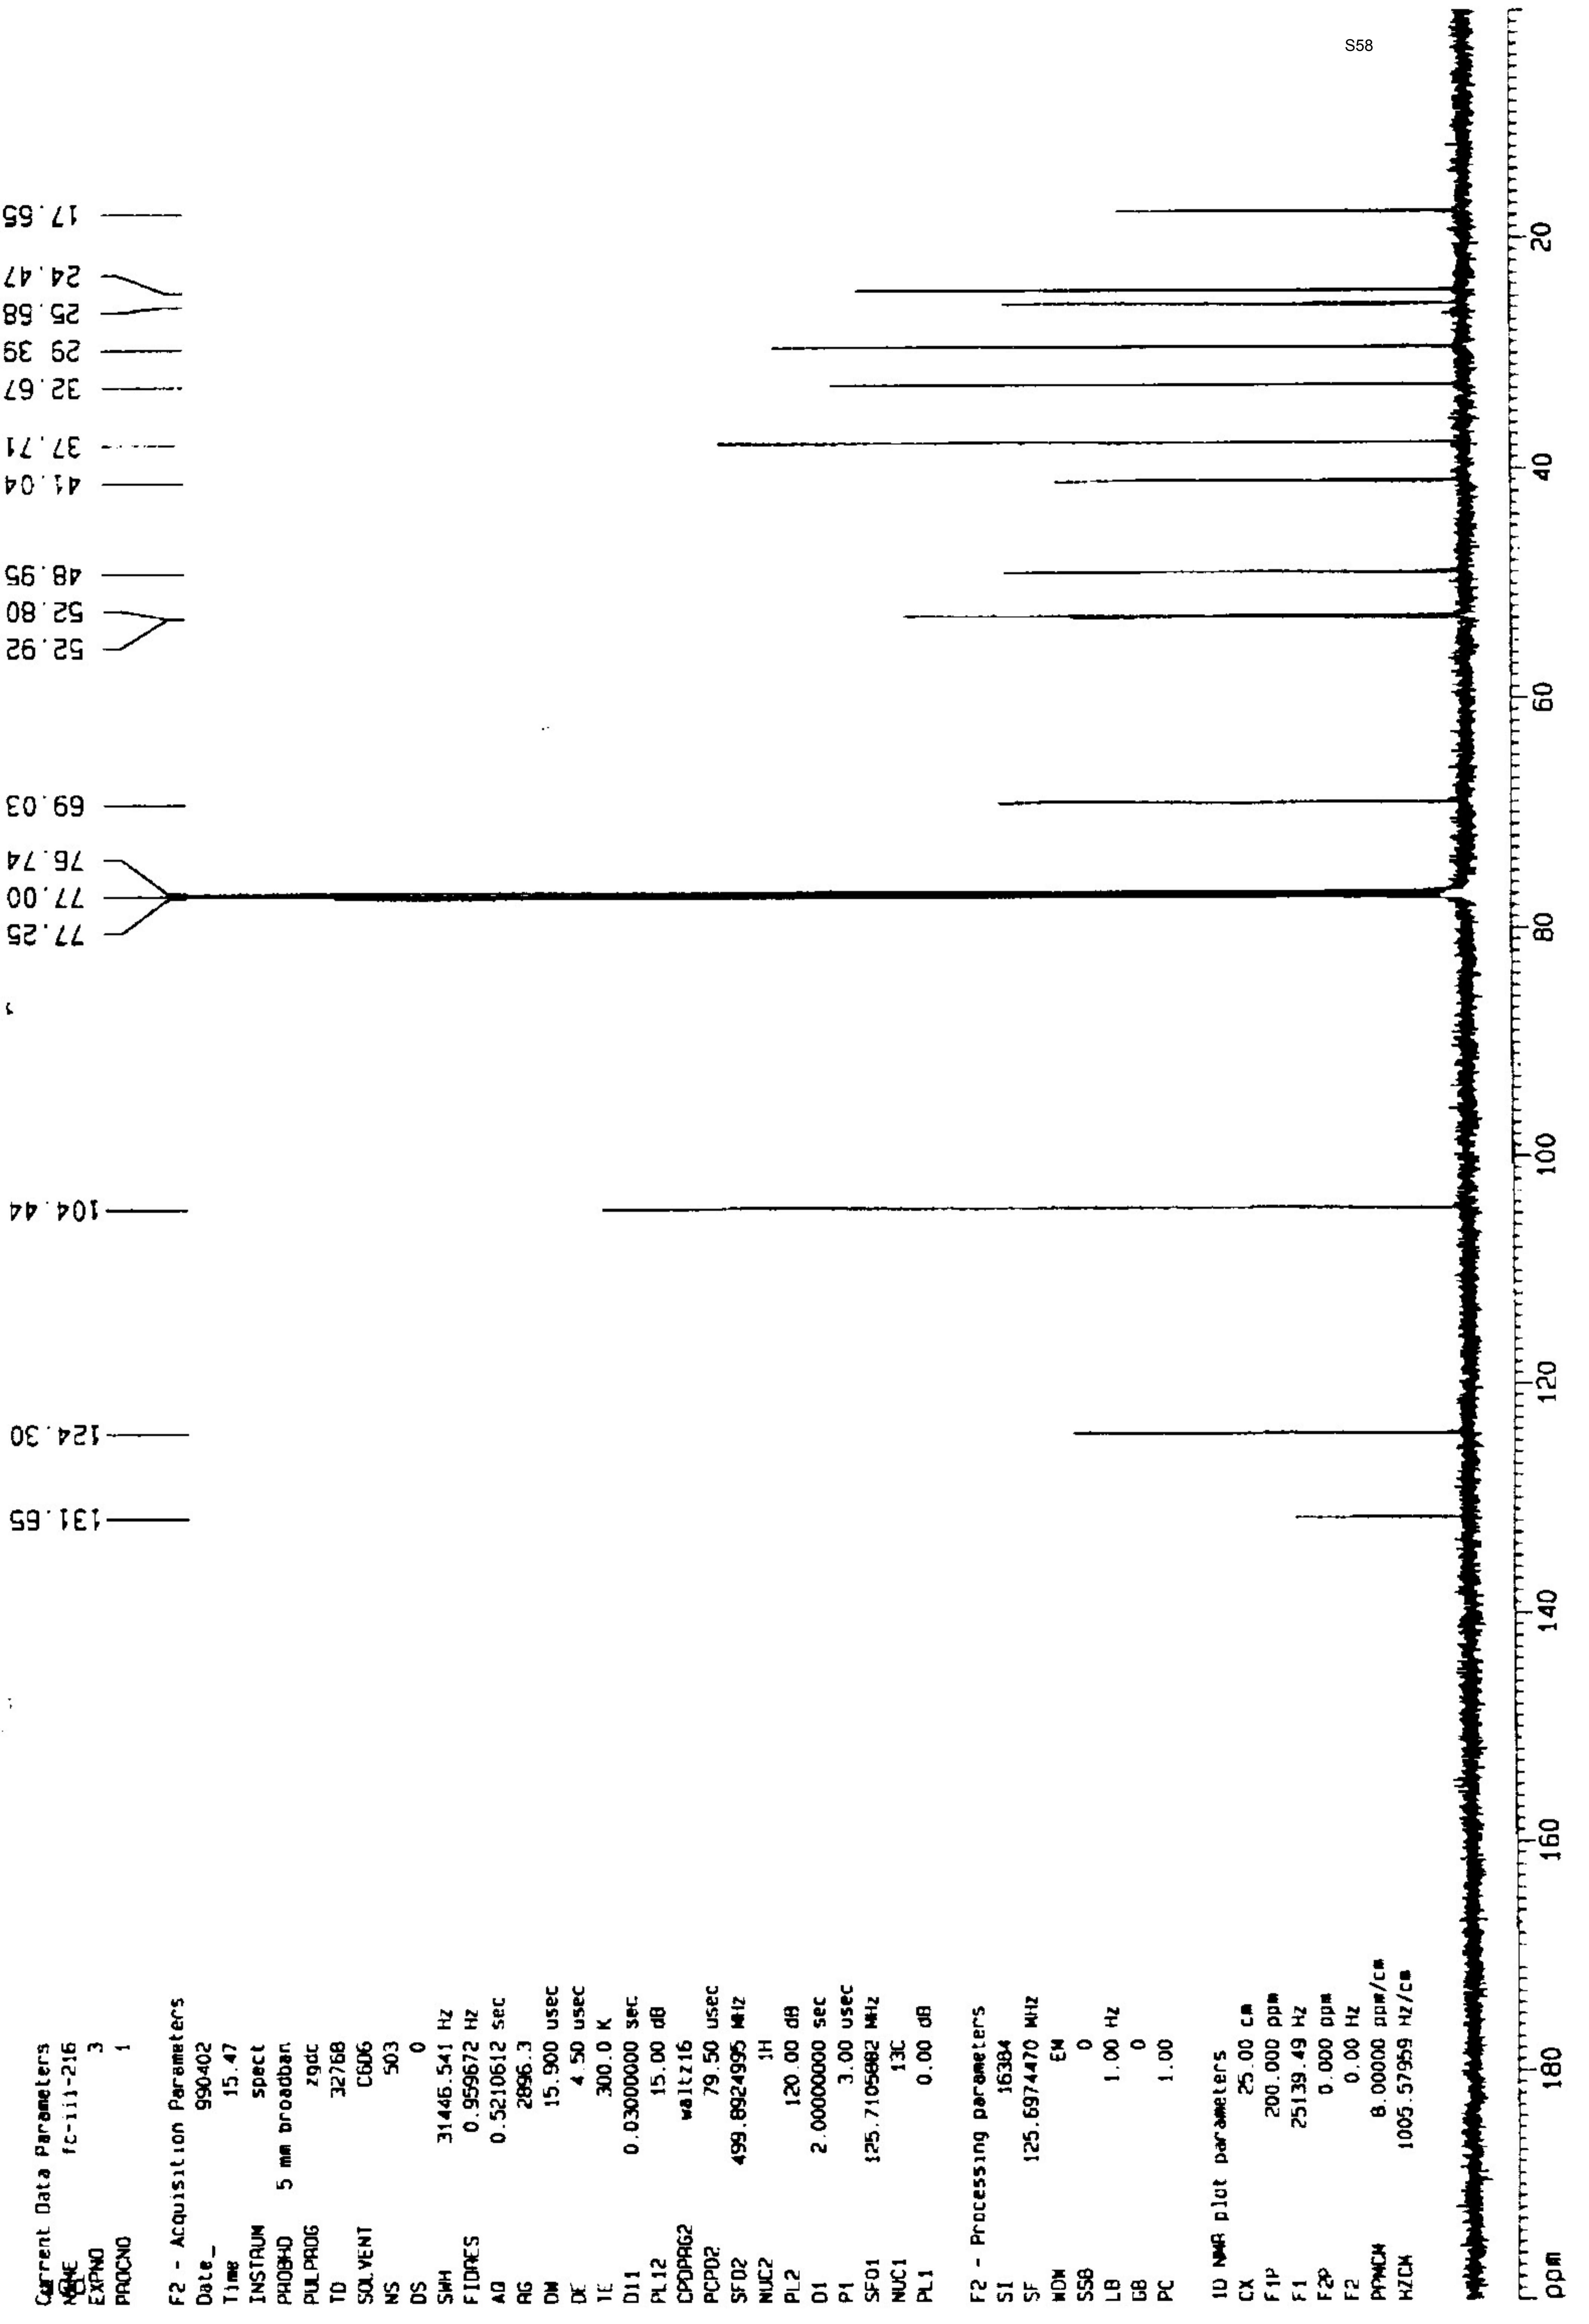

Current Data Parameters  
 NAME fc-311-150  
 EXPNO 1  
 PROCNO 1

F2 - Acquisition Parameters

Date\_ 980919  
 Time 12.38  
 INSTRUM spect  
 PROBHD 5 mm broadband  
 PULPROG zg  
 TO 32786  
 SOLVENT CDCl3  
 NS 16  
 DS 2  
 SWH 6009.615 Hz  
 FIDRES 0.183399 Hz  
 AQ 2.7283477 sec  
 RG 128  
 DR 83.200 usec  
 DE 6.00 usec  
 TE 300.0 K  
 D1 1.00000000 sec  
 P1 4.00 usec  
 SF01 500.0125001 MHz  
 NUC1 1H  
 PL1 0.00 dB

F2 - Processing parameters

SI 131072  
 SF 500.0300113 MHz  
 WDW EM  
 SSB 0  
 LB 0.30 Hz  
 GB 0  
 PC 1.00

1D NMR plot parameters

CA 25.00 cm  
 F1P 10.000 ppm  
 F1 5000.30 Hz  
 F2P -0.500 ppm  
 F2 -250.01 Hz  
 PPMCM 0.42000 ppm/cm  
 HZCM 210.01250 Hz/cm

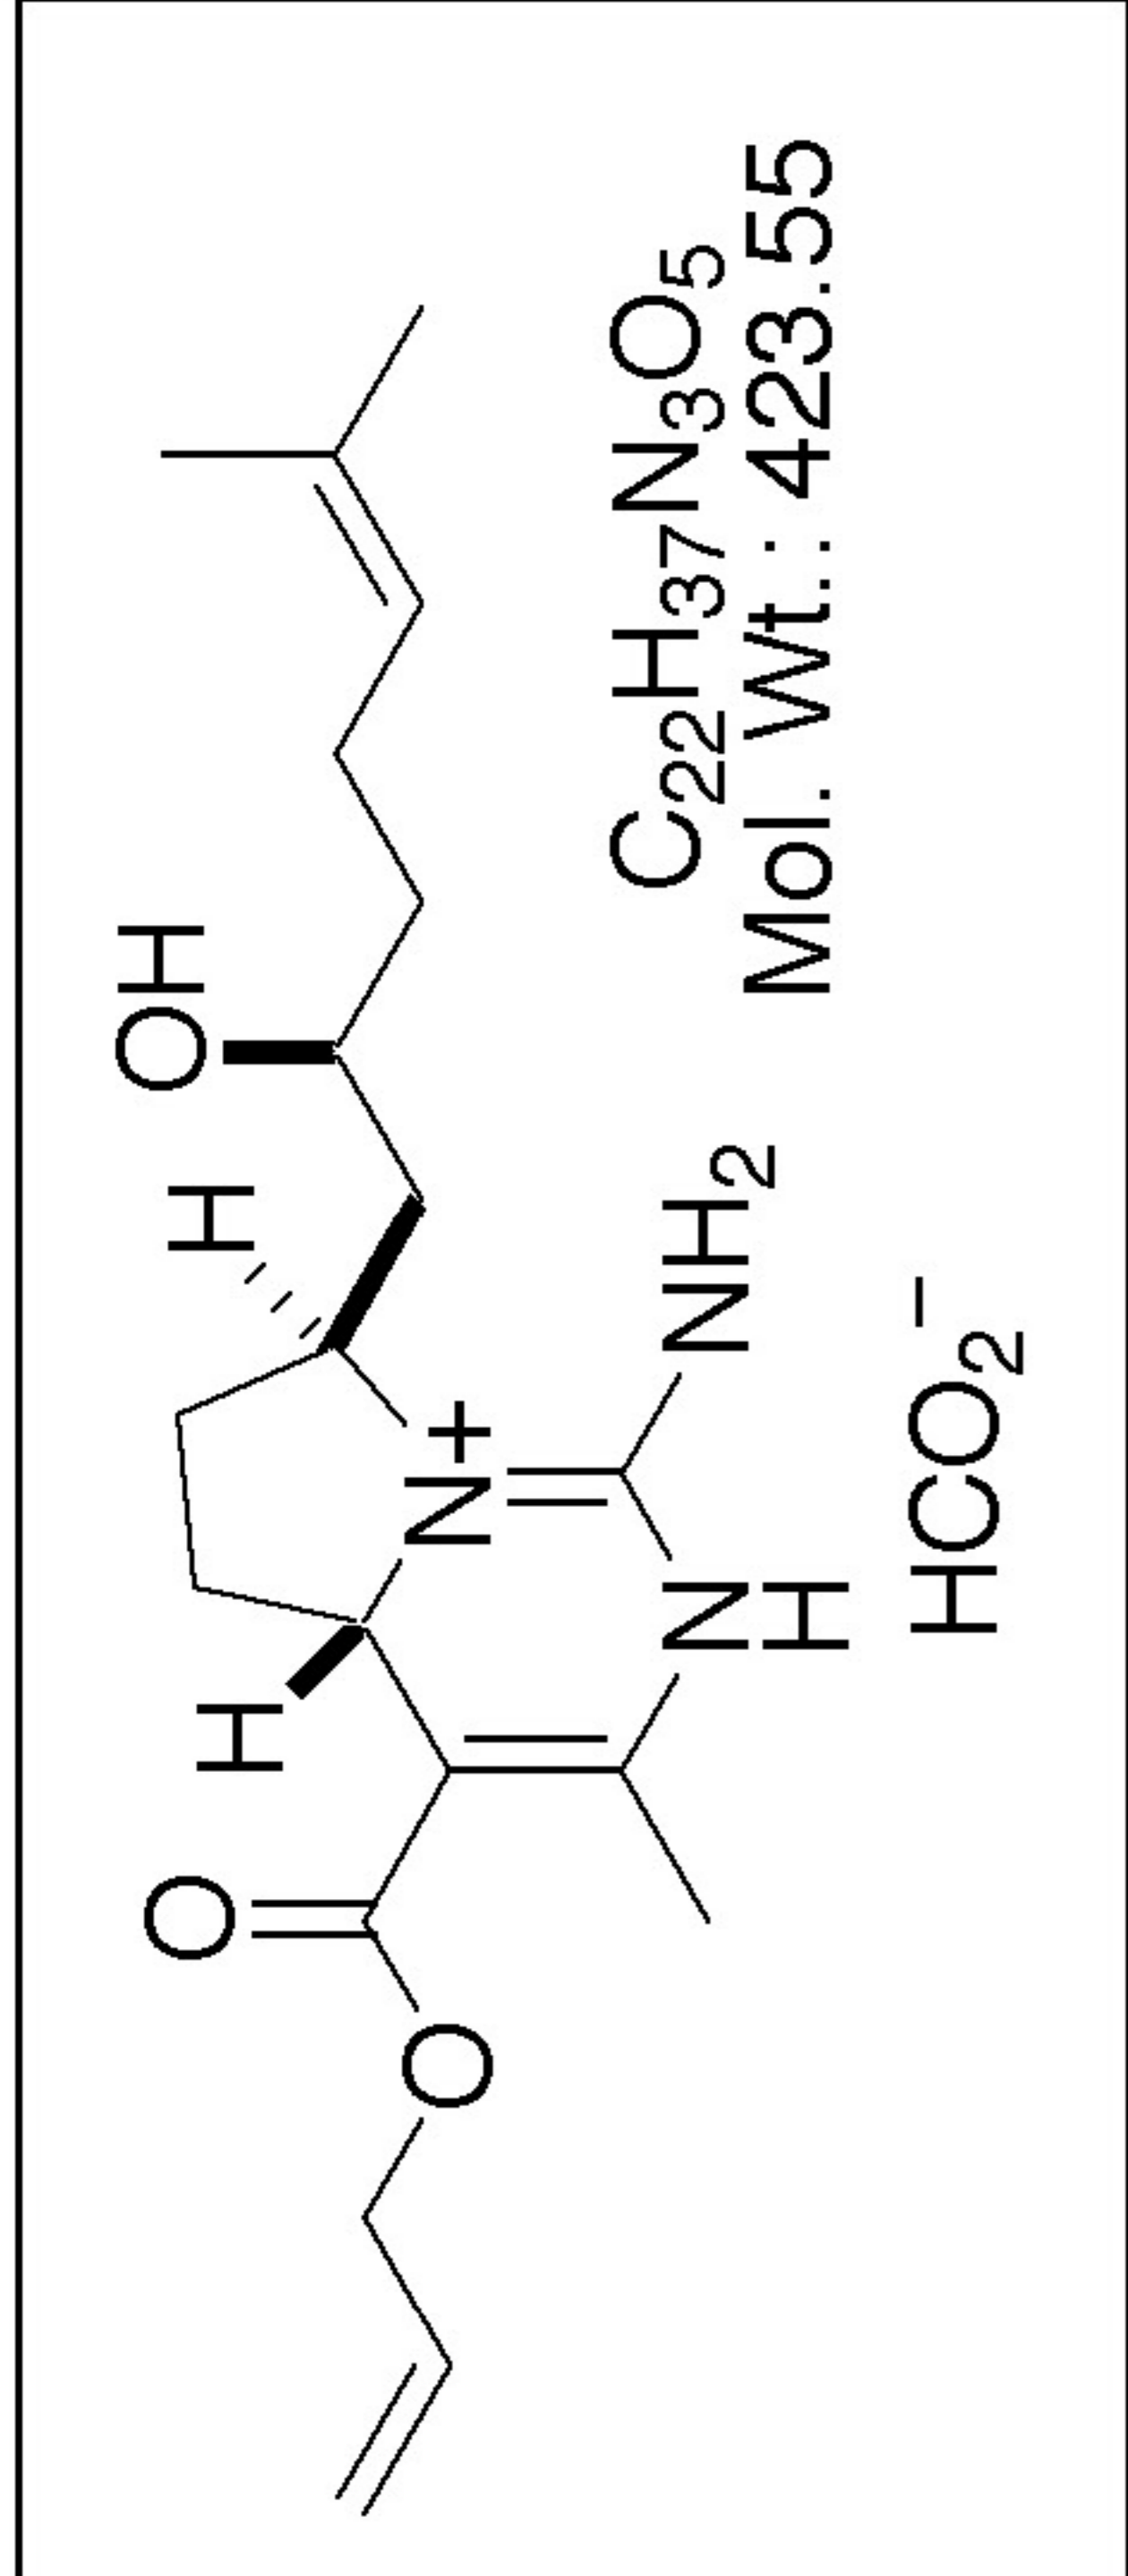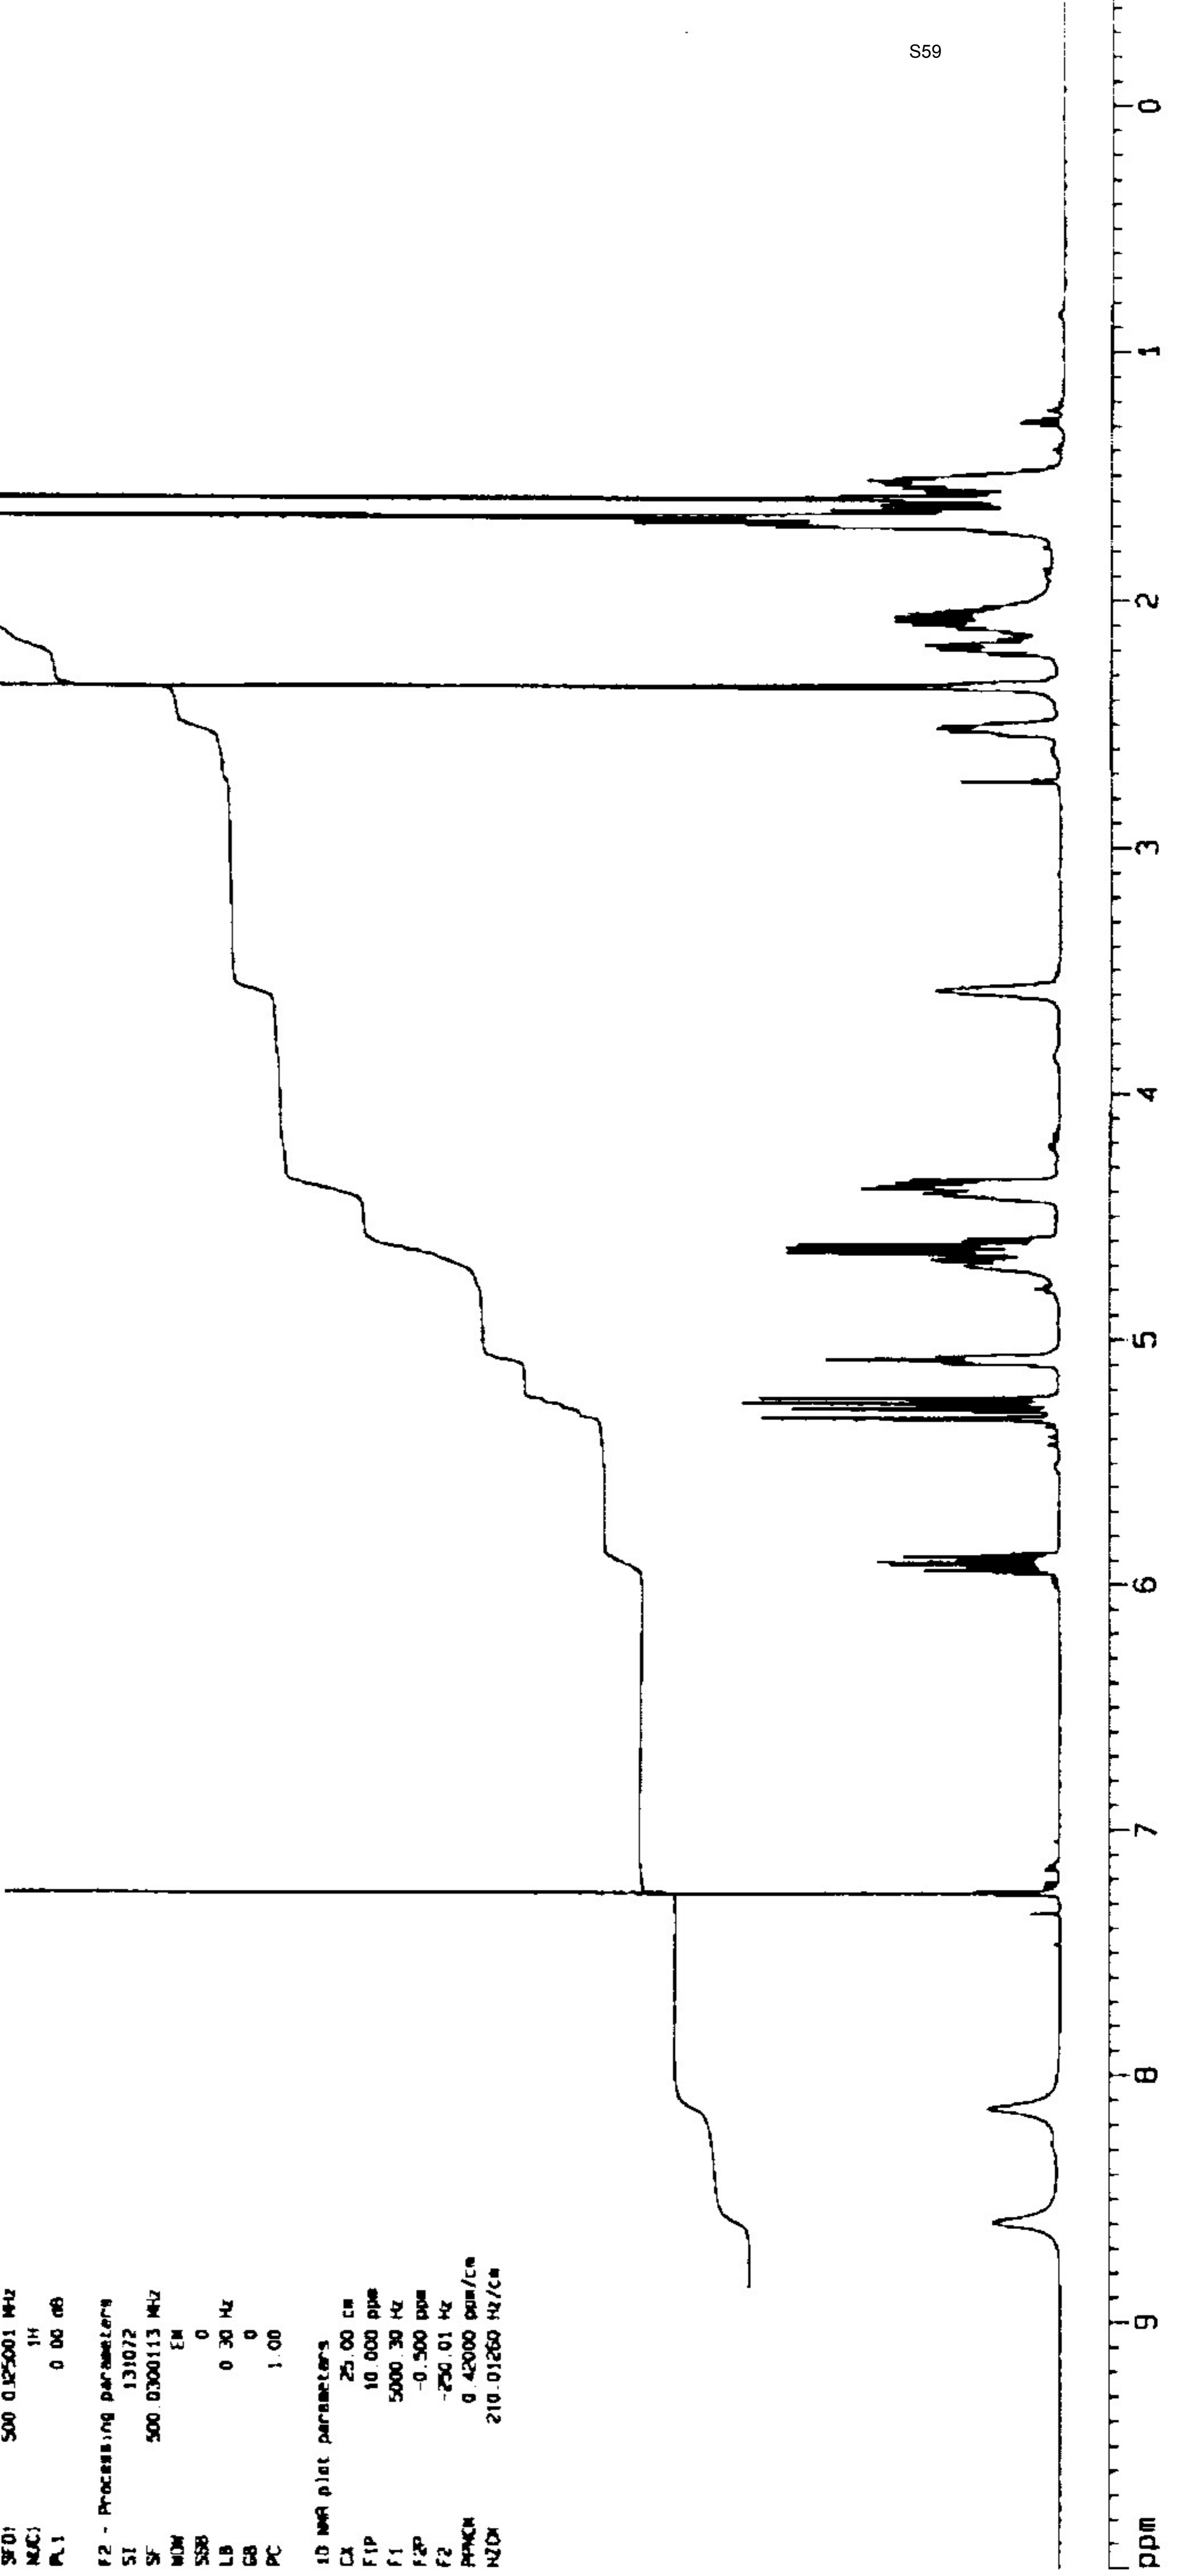

Current Data Parameters  
 NAME fc-111-15b  
 EXPNO 2  
 PROCNO 1  
 F2 - Acquisition Parameters  
 Date\_ 980919  
 Time 12.46  
 INSTRUM spect  
 PROBHD 5 mm broadband  
 PULPROG zgpgc  
 TD 32768  
 SOLVENT CDCl3  
 NS 261  
 DS 0  
 SWH 31446.541 Hz  
 FIDRES 0.959672 Hz  
 AQ 0.5210612 sec  
 RG 2896.3  
 DM 15.900 usec  
 DE 4.50 usec  
 TE 300.0 K  
 D11 0.03000000 sec  
 PL12 15.00 dB  
 CPDPRG2 waltz16  
 PCPD2 79.50 usec  
 SF02 500.0325001 MHz  
 NUC2 1H  
 PL2 120.00 dB  
 D1 2.50000000 sec  
 P1 3.00 usec  
 SF01 125.7457958 MHz  
 NUC1 13C  
 PL1 0.00 dB  
 F2 - Processing parameters  
 SI 16384  
 SF 125.7326501 MHz  
 WDM GM  
 SSB 0  
 LB 1.00 Hz  
 GB 0  
 PC 1.00  
 1D NMR plot parameters  
 CX 25.00 cm  
 F1P 200.000 ppm  
 F1 25148.53 Hz  
 F2P 0.000 ppm  
 F2 0.00 Hz  
 ppmCM 6.00000 ppm/cm  
 HzCM 1005.66121 Hz/cm

164.74  
 151.16  
 143.12  
 132.52  
 131.89  
 123.43  
 118.76  
 101.03  
 77.26  
 77.00  
 76.75  
 67.92  
 65.22  
 57.03  
 56.28  
 41.56  
 37.30  
 34.24  
 28.32  
 25.67  
 24.20  
 18.00  
 17.74

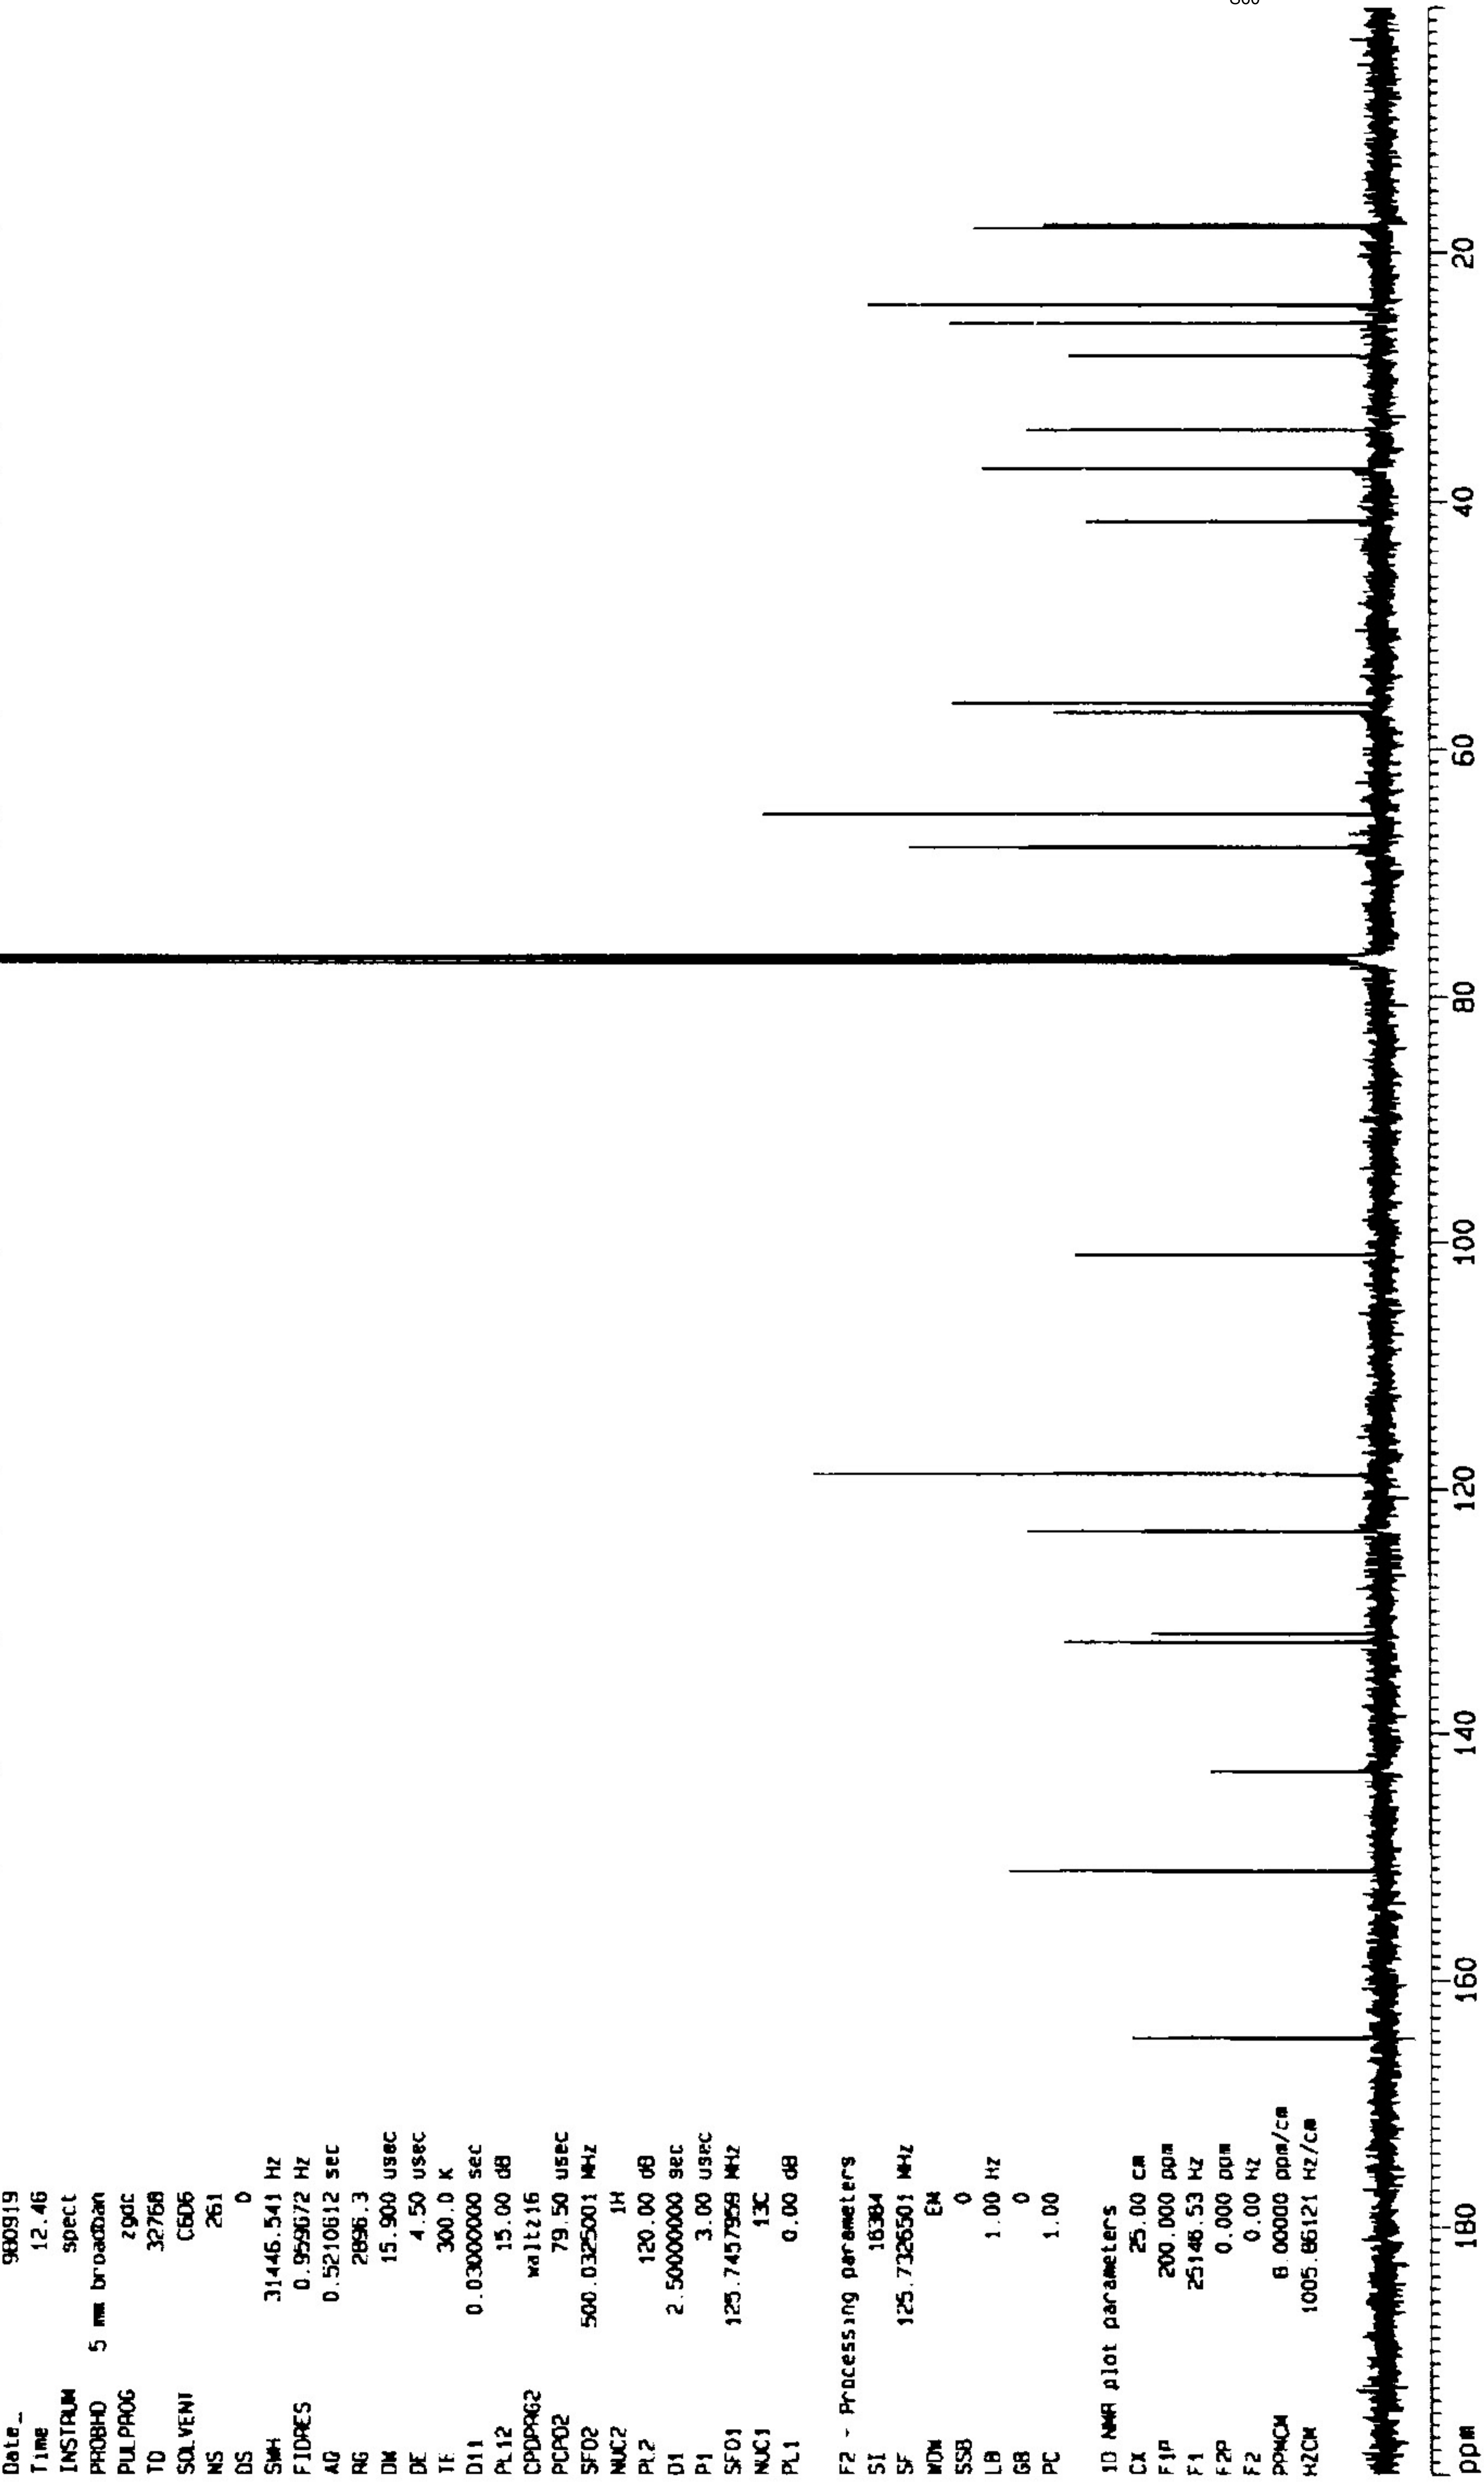

Current Data Parameters  
NAME FC-11-236  
EXPNO 3  
PROCNO 1

F2 - Acquisition Parameters  
Date\_ 990313  
Time 15:01  
INSTRUM spect  
PROBHD 5 mm broadband  
PULPROG zg  
TD 32768  
SOLVENT DMSO  
NS 16  
DS 2  
SWH 8009.615 Hz  
FIDRES 0.183399 Hz  
AQ 2.7263477 sec  
RG 128  
DM 83.200 usec  
DE 6.00 usec  
TE 300.0 K  
D1 1.00000000 sec  
P1 4.00 usec  
SFO1 499.8924995 MHz  
NUC1 1H  
PL1 0.00 dB

F2 - Processing parameters  
SI 32768  
SF 499.8900189 MHz  
WDW EM  
SSB 0  
LB 0.30 Hz  
GB 0  
PC 1.00

1D NMR plot parameters  
CX 25.00 cm  
FIP 10.000 000  
F1 4998.90 Hz  
F2 -0.500 ppm  
F2 -249.95 Hz  
PPHM 0.42000 ppm/cm  
HZCM 209.95361 Hz/cm

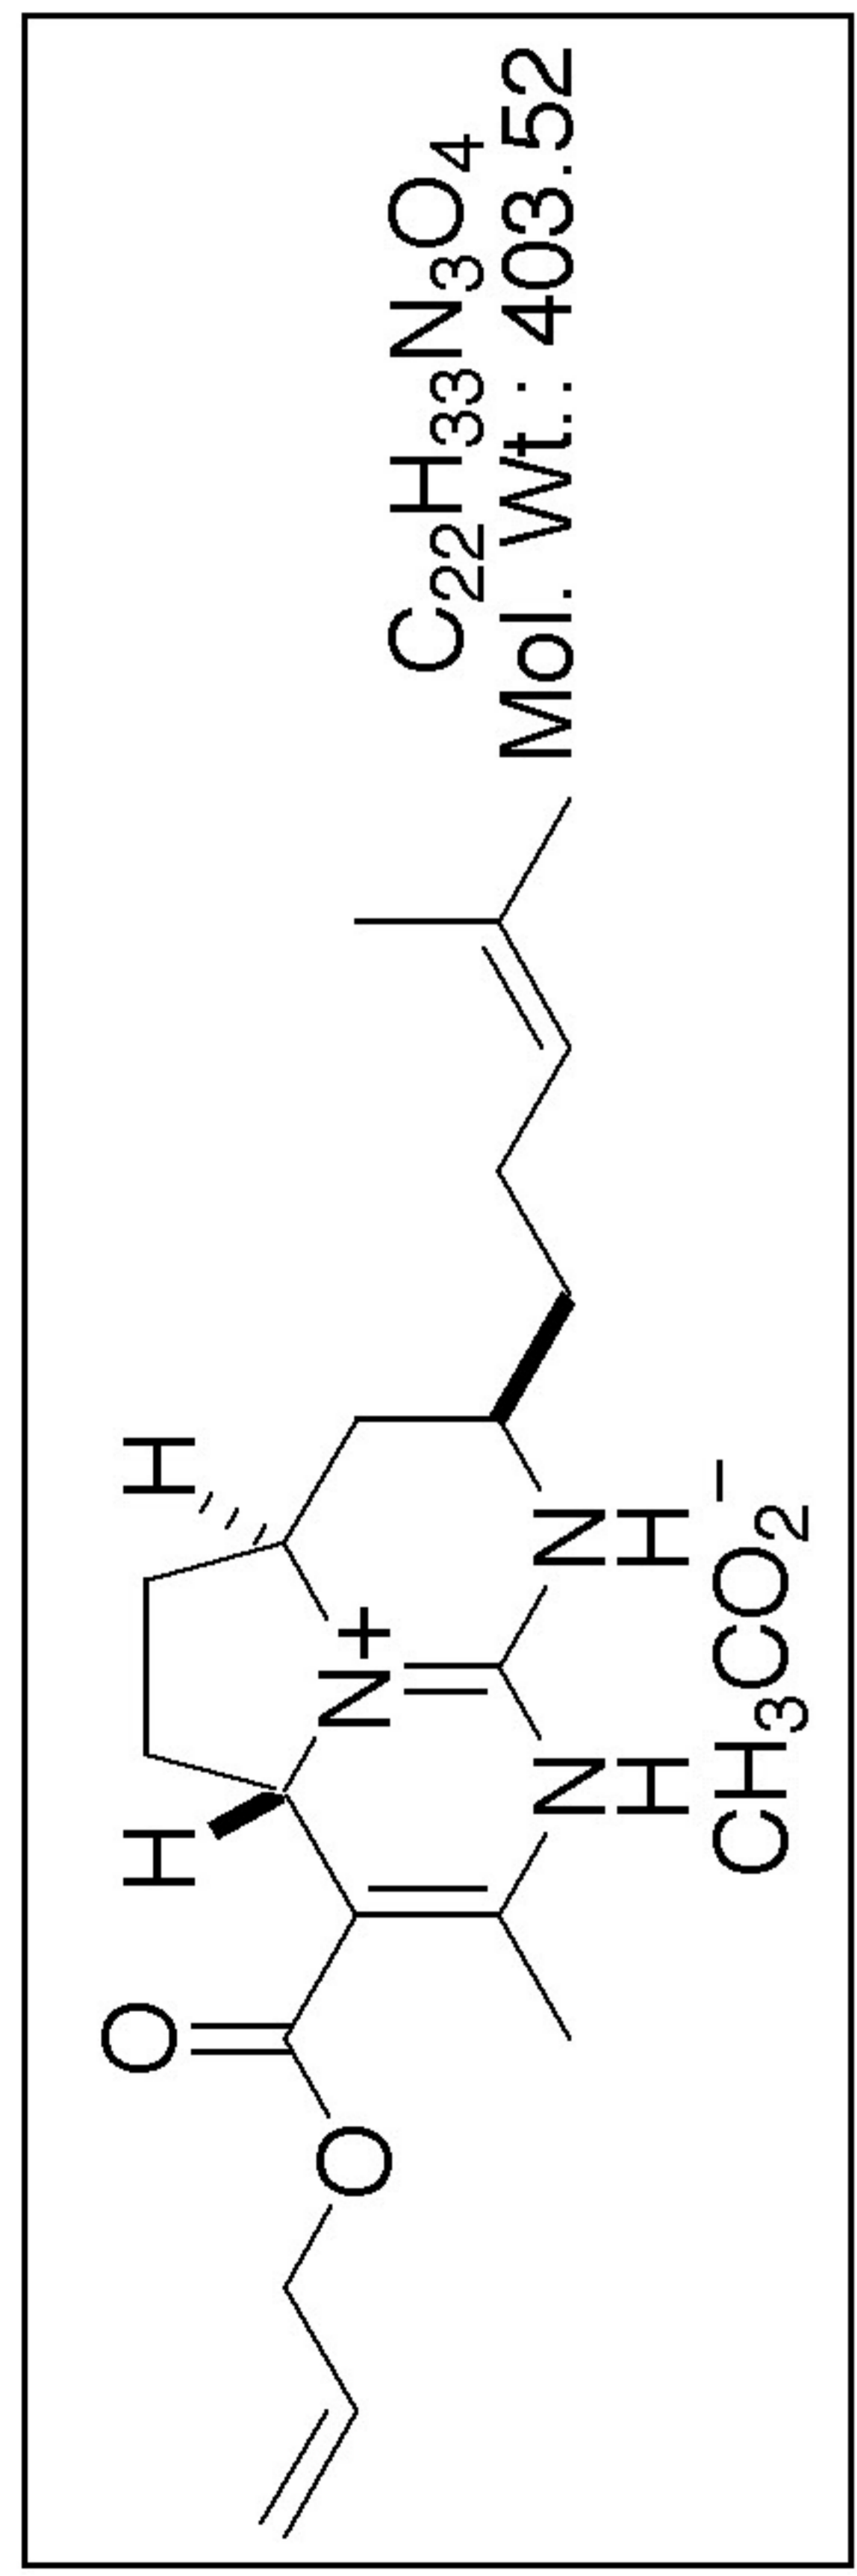

| ppm    | Integral |
|--------|----------|
| 0.9401 | 2.0167   |
| 1.0313 | 1.0313   |
| 2.0962 | 0.9632   |
| 1.0702 | 1.0702   |
| 1.0180 | 1.0180   |
| 1.0000 | 1.0000   |
| 5.2594 | 5.2594   |
| 2.2907 | 2.2907   |
| 3.8710 | 3.8710   |
| 2.0514 | 2.0514   |
| 4.3163 | 4.3163   |
| 4.3551 | 4.3551   |
| 1.2518 | 1.2518   |

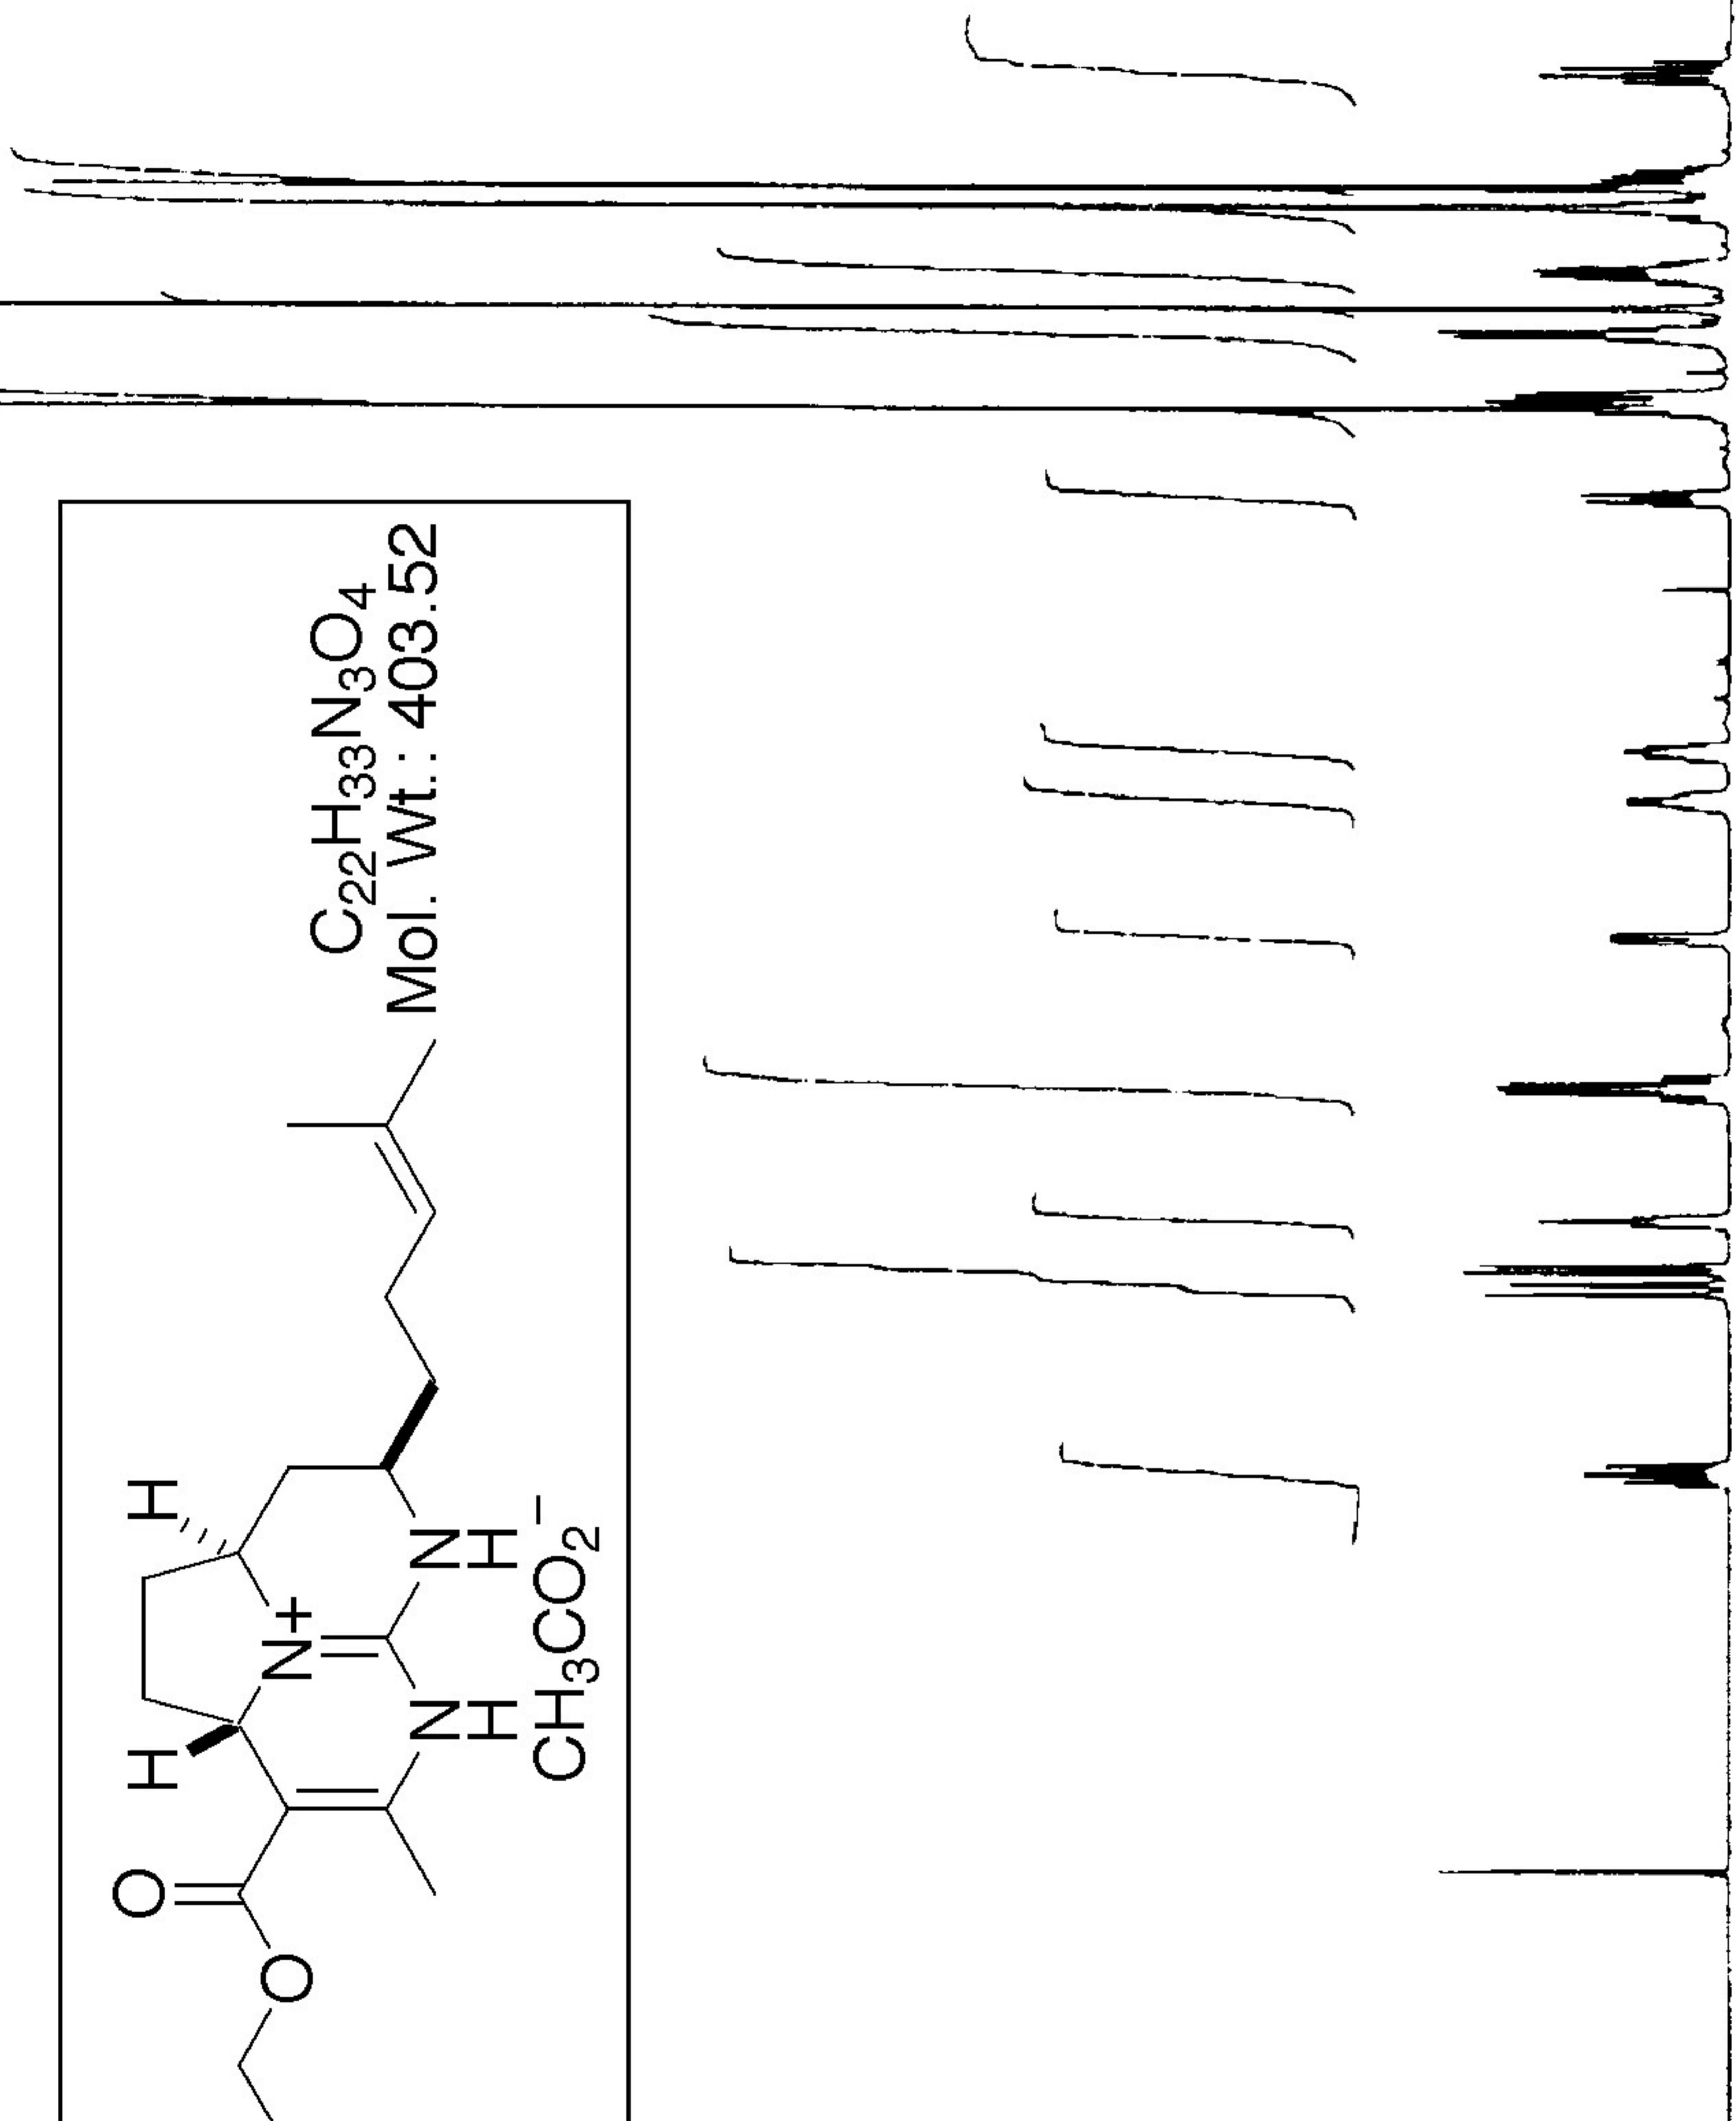



Current Data Parameters  
 NAME FC-111-206  
 EXPNO 1  
 PROCNO 1

F2 - Acquisition Parameters  
 Date\_ 990313  
 Time 15.08  
 INSTRUM spect  
 PROBHD 5 mm broadband  
 PULPROG zgdc  
 TD 32768  
 SOLVENT C6D6  
 NS 540  
 DS 0  
 SMH 31446.541 Hz  
 FIDRES 0.959672 Hz  
 AQ 0.5210612 sec  
 RG 5792.6  
 DW 15.900 usec  
 DE 4.50 usec  
 TE 300.0 K  
 D11 0.0300000 sec  
 PL12 15.00 dB  
 CPMPRG2 waltz16  
 PCPD2 79.50 usec  
 SF02 499.8924995 MHz  
 NUC2 1H  
 PL2 120.00 dB  
 D1 2.0000000 sec  
 P1 3.00 usec  
 SF01 125.7105882 MHz  
 NUC1 13C  
 PL1 0.00 dB

F2 - Processing parameters  
 SI 16304  
 SF 125.697409 MHz  
 MDW EM  
 SSB 0  
 LB 1.00 Hz  
 GB 0  
 PC 1.00

1D NMR plot parameters  
 CX 25.00 cm  
 FIP 200.000 ppm  
 F1 25139.49 Hz  
 F2P 0.00 ppm  
 F2 0.00 Hz  
 PPMCM 8 00000 ppm/cm  
 HZCM 1005.57959 Hz/cm

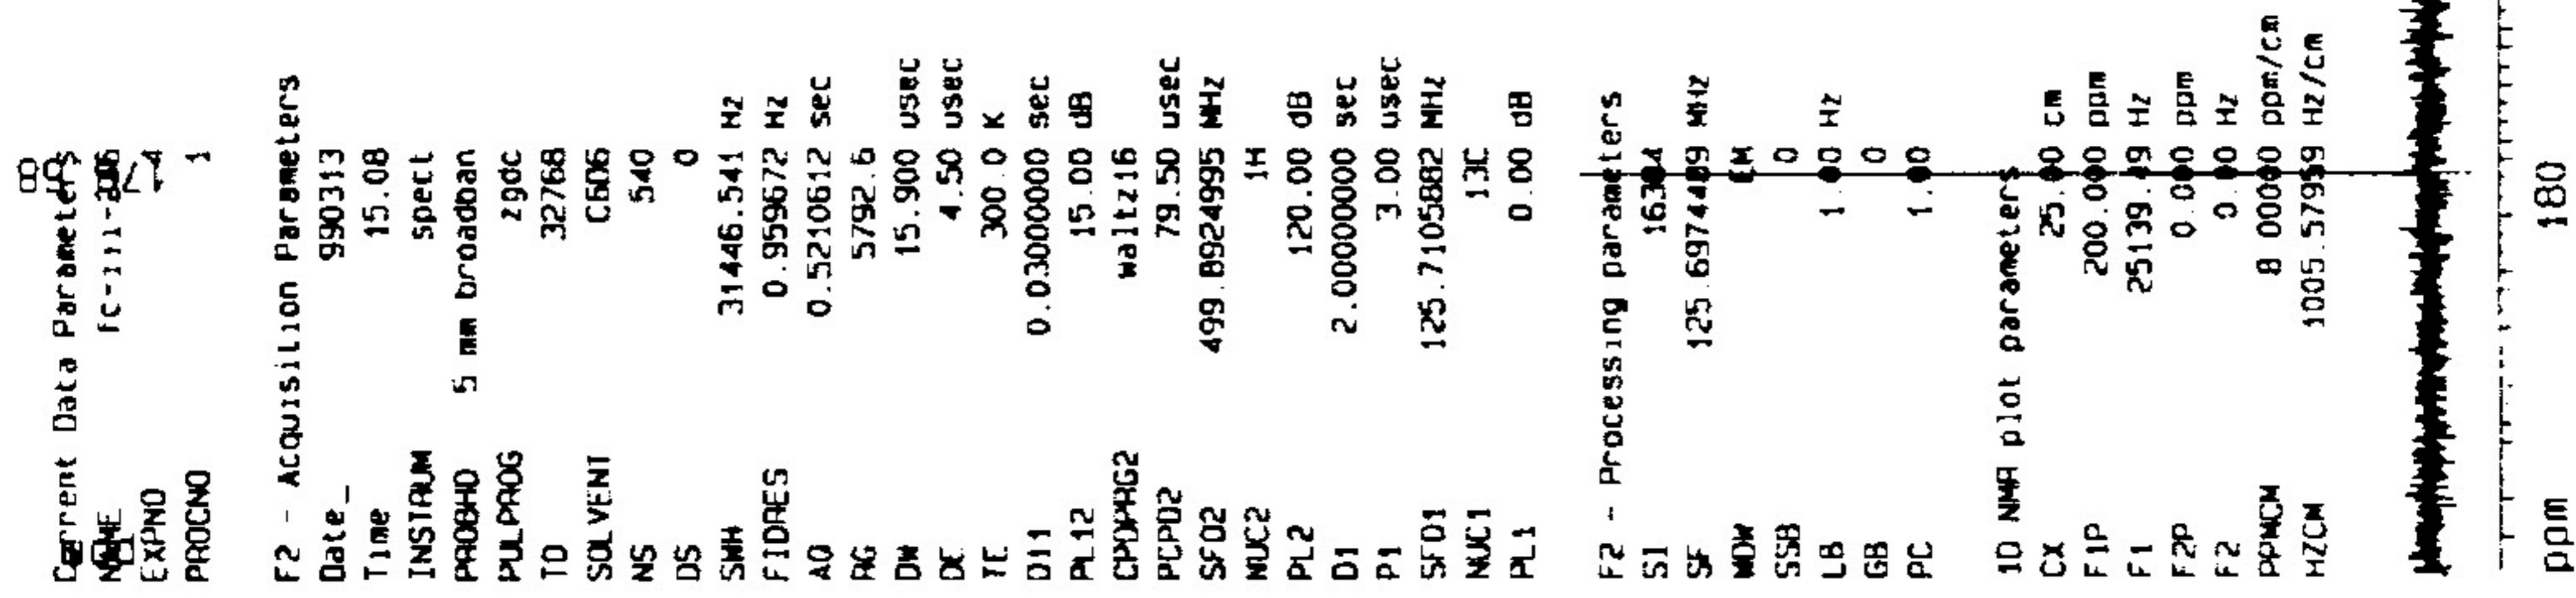

Current Data Parameters  
 NAME fc-11-28  
 EXPNO 8  
 PROCNO 1

F2 - Acquisition Parameters

Date\_ 990624  
 Time 20.36  
 INSTRUM spect  
 PROBHD 5 mm broadband  
 PULPROG zg  
 TO 32758  
 SOLVENT CDCl3  
 NS 16  
 DS 2  
 SWH 6009.615 Hz  
 FIDRES 0.163389 Hz  
 AQ 2.7253477 sec  
 RG 256  
 DM 83.200 usec  
 DE 6.00 usec  
 TE 300.0 K  
 D1 1.00000000 sec  
 P1 4.00 usec  
 SFO1 499.8924995 MHz  
 NUC1 1H  
 PL1 0.00 dB

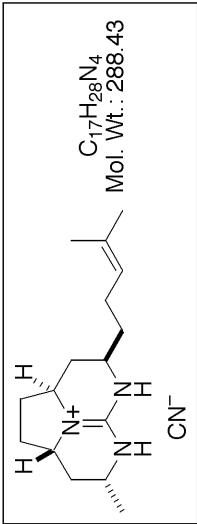

F2 - Processing parameters

SF 32768  
 SF 499.8900194 MHz  
 WDW EM  
 SSB 0  
 LB 0.30 Hz  
 GB 0  
 PC 1.00

1D NMR plot parameters

CX 25.00 cm  
 F1P 10.000 ppm  
 F1 4998.90 Hz  
 F2P -0.500 ppm  
 F2 -249.95 Hz  
 PPMCM 0.42000 ppm/cm  
 HZCM 209.95381 Hz/cm

Integral

1.0000  
 8.6165

3.0973  
 1.1018  
 2.7247

2.4388  
 2.4577  
 2.4534

3.4597  
 3.4749  
 7.5346  
 2.4965  
 4.0823

S63

ppm

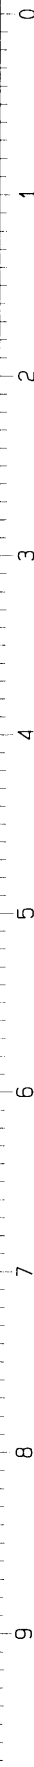

Current Data Parameters

NAME fc-111-281  
 EXPNO 6  
 PROCNO 1

F2 - Acquisition Parameters  
 Date\_ 990422  
 Time 21.53  
 INSTRUM spect  
 PROBHD 5 mm broadband  
 PULPROG zgpg  
 TD 32768  
 SOLVENT C6D6  
 NS 1154  
 DS 0  
 SWH 31446.541 Hz  
 FIDRES 0.959672 Hz  
 AQ 0.5210612 sec  
 RG 6502  
 DW 15.900 usec  
 DE 4.50 usec  
 TE 300.0 K  
 D11 0.03000000 sec  
 PL12 15.00 dB  
 PLT16  
 CPDPRG2 waltz16  
 PCPD2 79.50 usec  
 SF02 499.8924995 MHz  
 NUC2 1H  
 PL2 120.00 dB  
 D1 2.00000000 sec  
 P1 3.00 usec  
 SF01 125.7105882 MHz  
 NUC1 13C  
 PL1 0.00 dB

F2 - Processing parameters  
 SI 16384  
 SF 125.6973933 MHz  
 NDM EM  
 SSB 0  
 LB 1.00 Hz  
 GB 0  
 PC 1.00

1D NMR plot parameters  
 CX 25.00 cm  
 F1P 200.000 ppm  
 F1 25139.48 Hz  
 F2P 0.000 ppm  
 F2 0.00 Hz  
 PPMCM 8.00000 ppm/cm  
 HZCM 1005.57916 Hz/cm

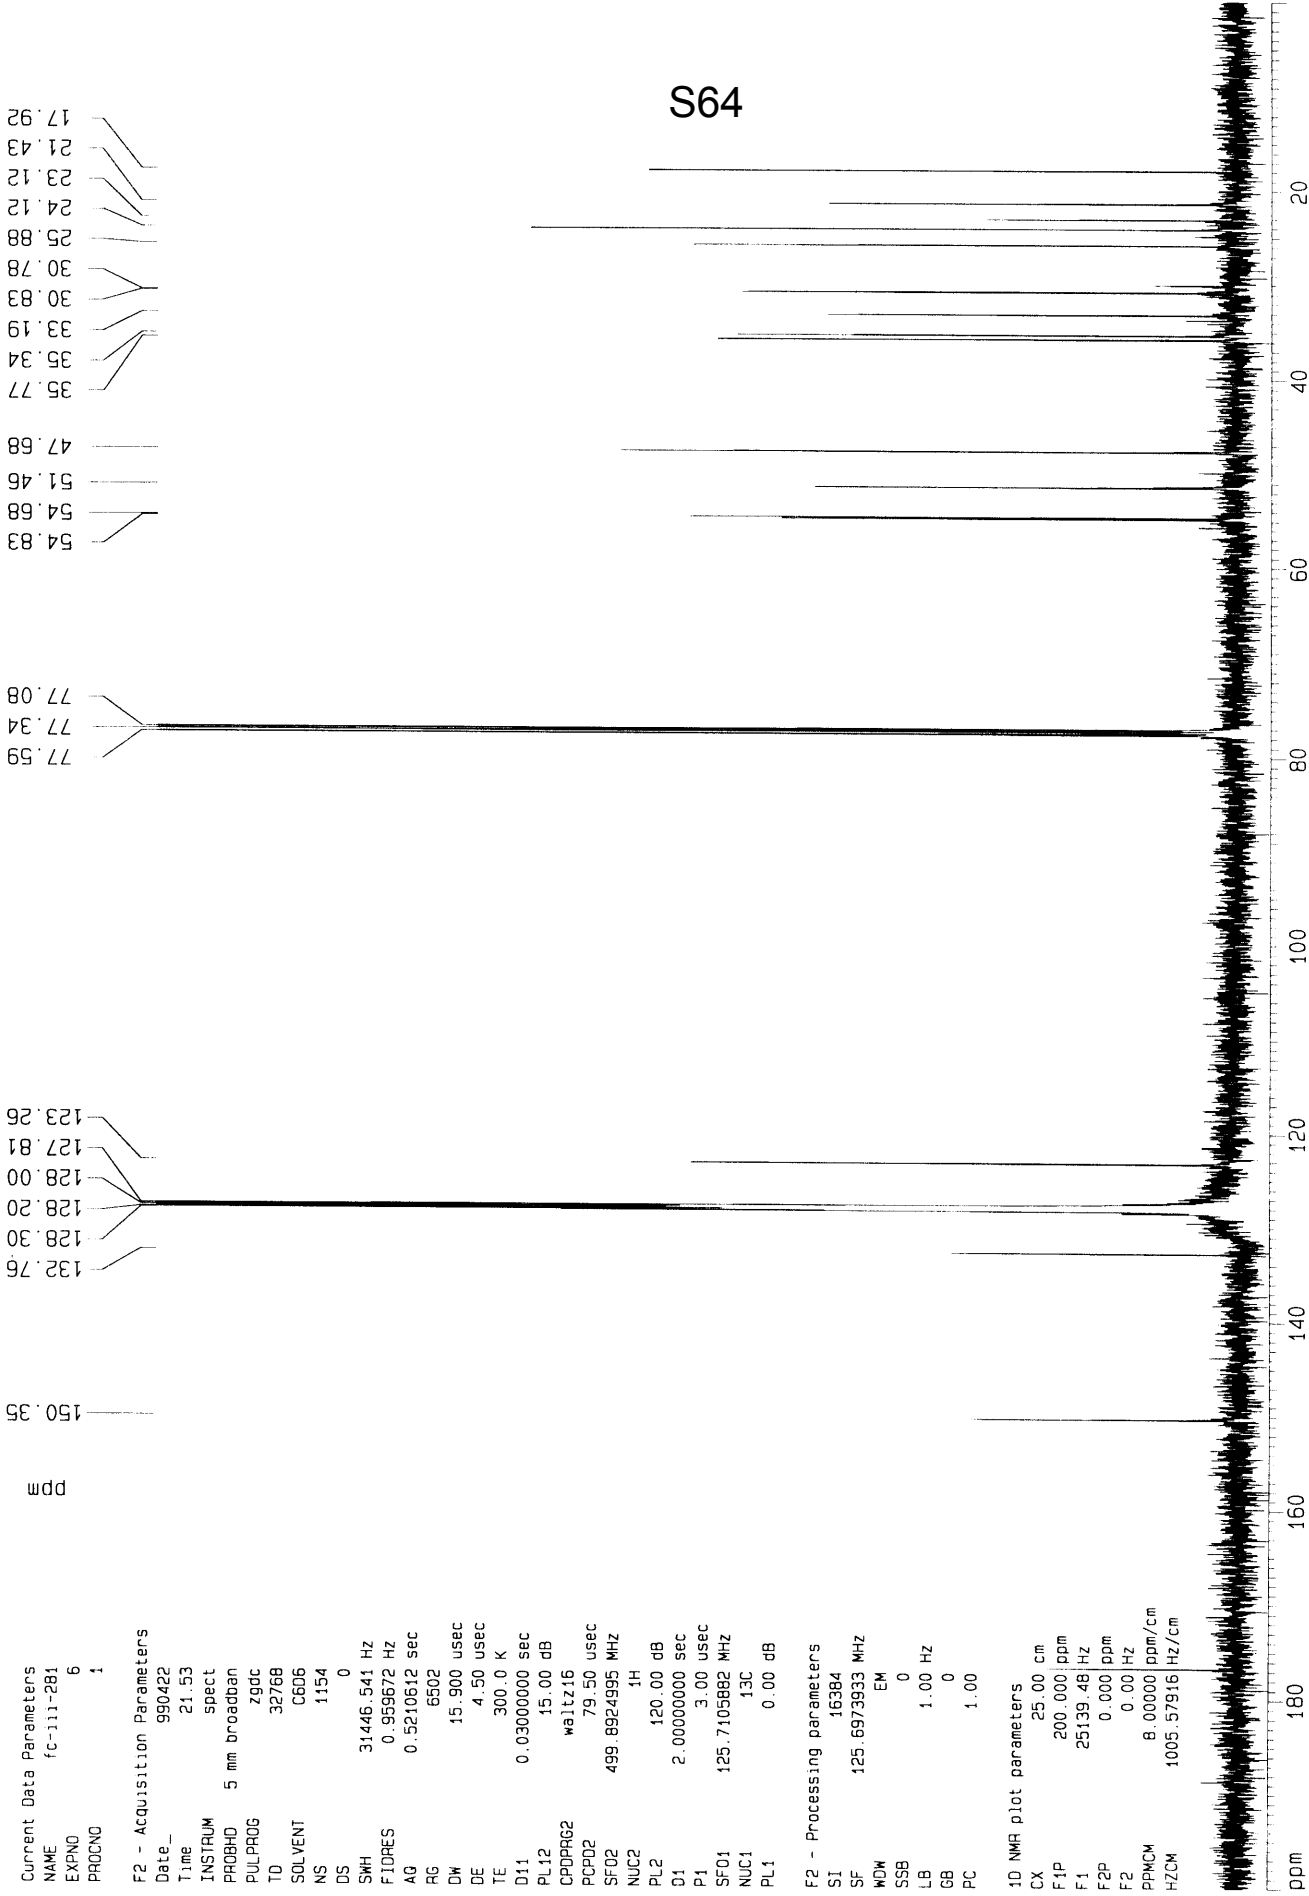

S65

Integral

|       |
|-------|
| 3.294 |
| 1.189 |
| 1.046 |
| 4.491 |
| 2.331 |
| 2.443 |
| 9.558 |
| 5.665 |
| 3.300 |

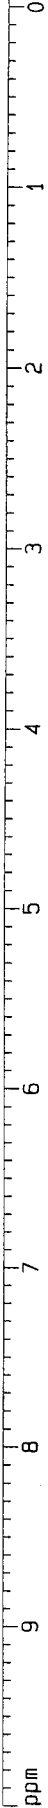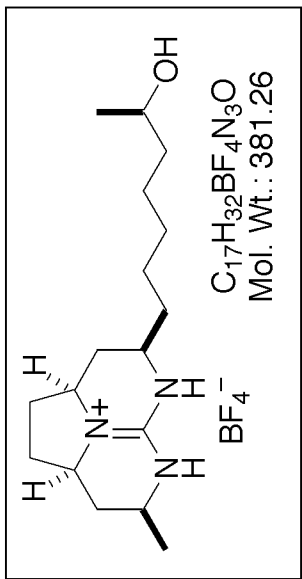

Current Data Parameters  
 NAME fc-1v-125b  
 EXPNO 1  
 PROCNO 1

F2 - Acquisition Parameters  
 Date\_ 991002  
 Time 14.55  
 INSTRUM spect  
 PROBHD 5 mm QNP 1H  
 PULPROG zg  
 TO 16384  
 SOLVENT CDCl3  
 NS 16  
 DS 2  
 SWH 4769.272 Hz  
 FIDRES 0.254314 Hz  
 AQ 1.119295 sec  
 RG 256  
 DN 104.400 usec  
 DE 4.50 usec  
 TE 300.0 K  
 D1 1.00000000 sec

\*\*\*\*\* CHANNEL f1 \*\*\*\*\*  
 NUC1 31P  
 P1 4.00 usec  
 PL1 0.00 dB  
 SFO1 400.1320007 MHz

F2 - Processing parameters  
 SI 32768  
 SF 400.1300113 MHz  
 WDM EK  
 SSB 0  
 LB 0.30 Hz  
 GB 0  
 PC 1.00

1D NMR plot parameters  
 CX 25.00 cm  
 F1P 10.000 ppm  
 F1 4001.30 Hz  
 F2P -0.500 ppm  
 F2 -200.07 Hz  
 PPM0K 0.42000 ppm/cm  
 HZCM 169.05460 Hz/cm

151.10

Current Data Parameters  
NAME fc-iv-103  
EXPNO 2  
PROCNO 1

F2 - Acquisition Parameters

Date\_ 990921  
Time 9.42  
INSTRUM spect  
PROBHD 5 mm broadband  
PULPROG zgdc  
TO 32768  
SOLVENT C6D6  
NS 681  
DS 0  
SWH 31446.541 Hz  
FIDRES 0.959672 Hz  
AQ 0.5210612 sec  
RG 7298.2  
DW 15.900 usec  
DE 4.50 usec  
TE 300.0 K  
D1 2.00000000 sec  
D11 0.03000000 sec

==== CHANNEL f1 =====

NUC1 13C  
P1 3.00 usec  
PL1 0.00 dB  
SF01 125.7105882 MHz

==== CHANNEL f2 =====

CPDPRG2 waltz16  
NUC2 1H  
PCPD2 79.50 usec  
PL2 120.00 dB  
PL12 15.00 dB  
SF02 499.8924995 MHz

F2 - Processing parameters

SI 16384  
SF 125.6972661 MHz  
WDW EM  
SSB 0  
LB 1.00 Hz  
GB 0  
PC 1.00

1D NMR plot parameters

CX 25.00 cm  
F1P 200.000 ppm  
F1 25139.45 Hz  
F2P 0.000 ppm  
F2 0.00 Hz

68.47  
57.53  
57.47  
51.58  
49.34  
49.17  
49.00  
48.83  
40.01  
36.72  
31.06  
31.03  
30.57  
26.71  
26.22  
23.56  
20.78

S99

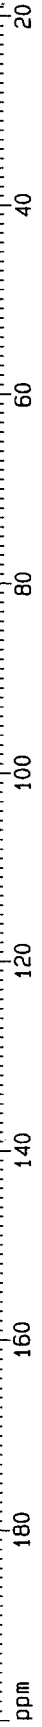

Current Data Parameters  
 NAME fc-111-299  
 EXPNO 2  
 PROCNO 1

F2 - Acquisition Parameters

Date\_ 990515  
 Time 9.29  
 INSTRUM spect  
 PROBO 5 mm broadband  
 PULPROG zg  
 TD 32768  
 SOLVENT CDCl3  
 NS 16  
 DS 2  
 SRR 6009.615 Hz  
 FIDRES 0.183389 Hz  
 AQ 2.7263477 sec  
 RG 574.7  
 DW 83.200 usec  
 DE 6.00 usec  
 TE 300.0 K  
 D1 1.00000000 sec  
 P1 4.00 usec  
 SF01 499.8924995 MHz  
 NUC1 1H  
 PL1 0.00 dB

F2 - Processing parameters

SI 32768  
 SF 499.8900172 MHz  
 KW 0  
 SSS 0  
 LB 0.30 Hz  
 GB 0  
 PC 1.00

1D NMR plot parameters

CX 25.00 cm  
 F1P 10.000 ppm  
 F1 4999.90 Hz  
 F2P -0.500 ppm  
 F2 -249.95 Hz  
 PRGM 0.42000 ppm/cm  
 HZCM 209.85381 Hz/cm

S67

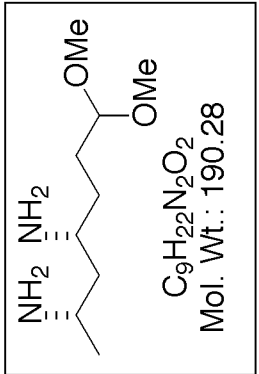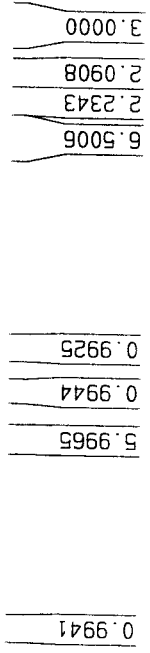

Integral

ppm

Current Data Parameters  
 NAME fc-111-259  
 EXPNO 3  
 PROCNO 1

F2 - Acquisition Parameters

Date\_ 990515  
 Time 9.32  
 INSTRUM spect  
 PROBHD 5 mm broadband  
 PULPROG zgpg  
 TD 32768  
 SOLVENT C6D6  
 NS 688  
 DS 0  
 SWH 31446.541 Hz  
 FIDRES 0.959672 Hz  
 AQ 0.5210612 sec  
 RG 2896.3  
 DW 15.900 usec  
 DE 4.50 usec  
 TE 300.0 K  
 D11 0.03000000 sec  
 PL12 15.00 dB  
 CPOPRG2 waitz16  
 PCPD02 79.50 usec  
 SF02 499.8924995 MHz  
 NUC2 1H  
 PL2 120.00 dB  
 D1 2.00000000 sec  
 P1 3.00 usec  
 SF01 125.7105882 MHz  
 NUC1 13C  
 PL1 0.00 dB

F2 - Processing parameters

SI 16384  
 SF 125.6974451 MHz  
 WDW EM  
 SSB 0  
 LB 1.00 Hz  
 GB 0  
 PC 1.00

1D NMR plot parameters

CX 25.00 cm  
 F1P 200.000 ppm  
 F1 25139.49 Hz  
 F2P 0.000 ppm  
 F2 0.00 Hz  
 PPMCM 8.00000 ppm/cm  
 HZCM 1005.57959 Hz/cm

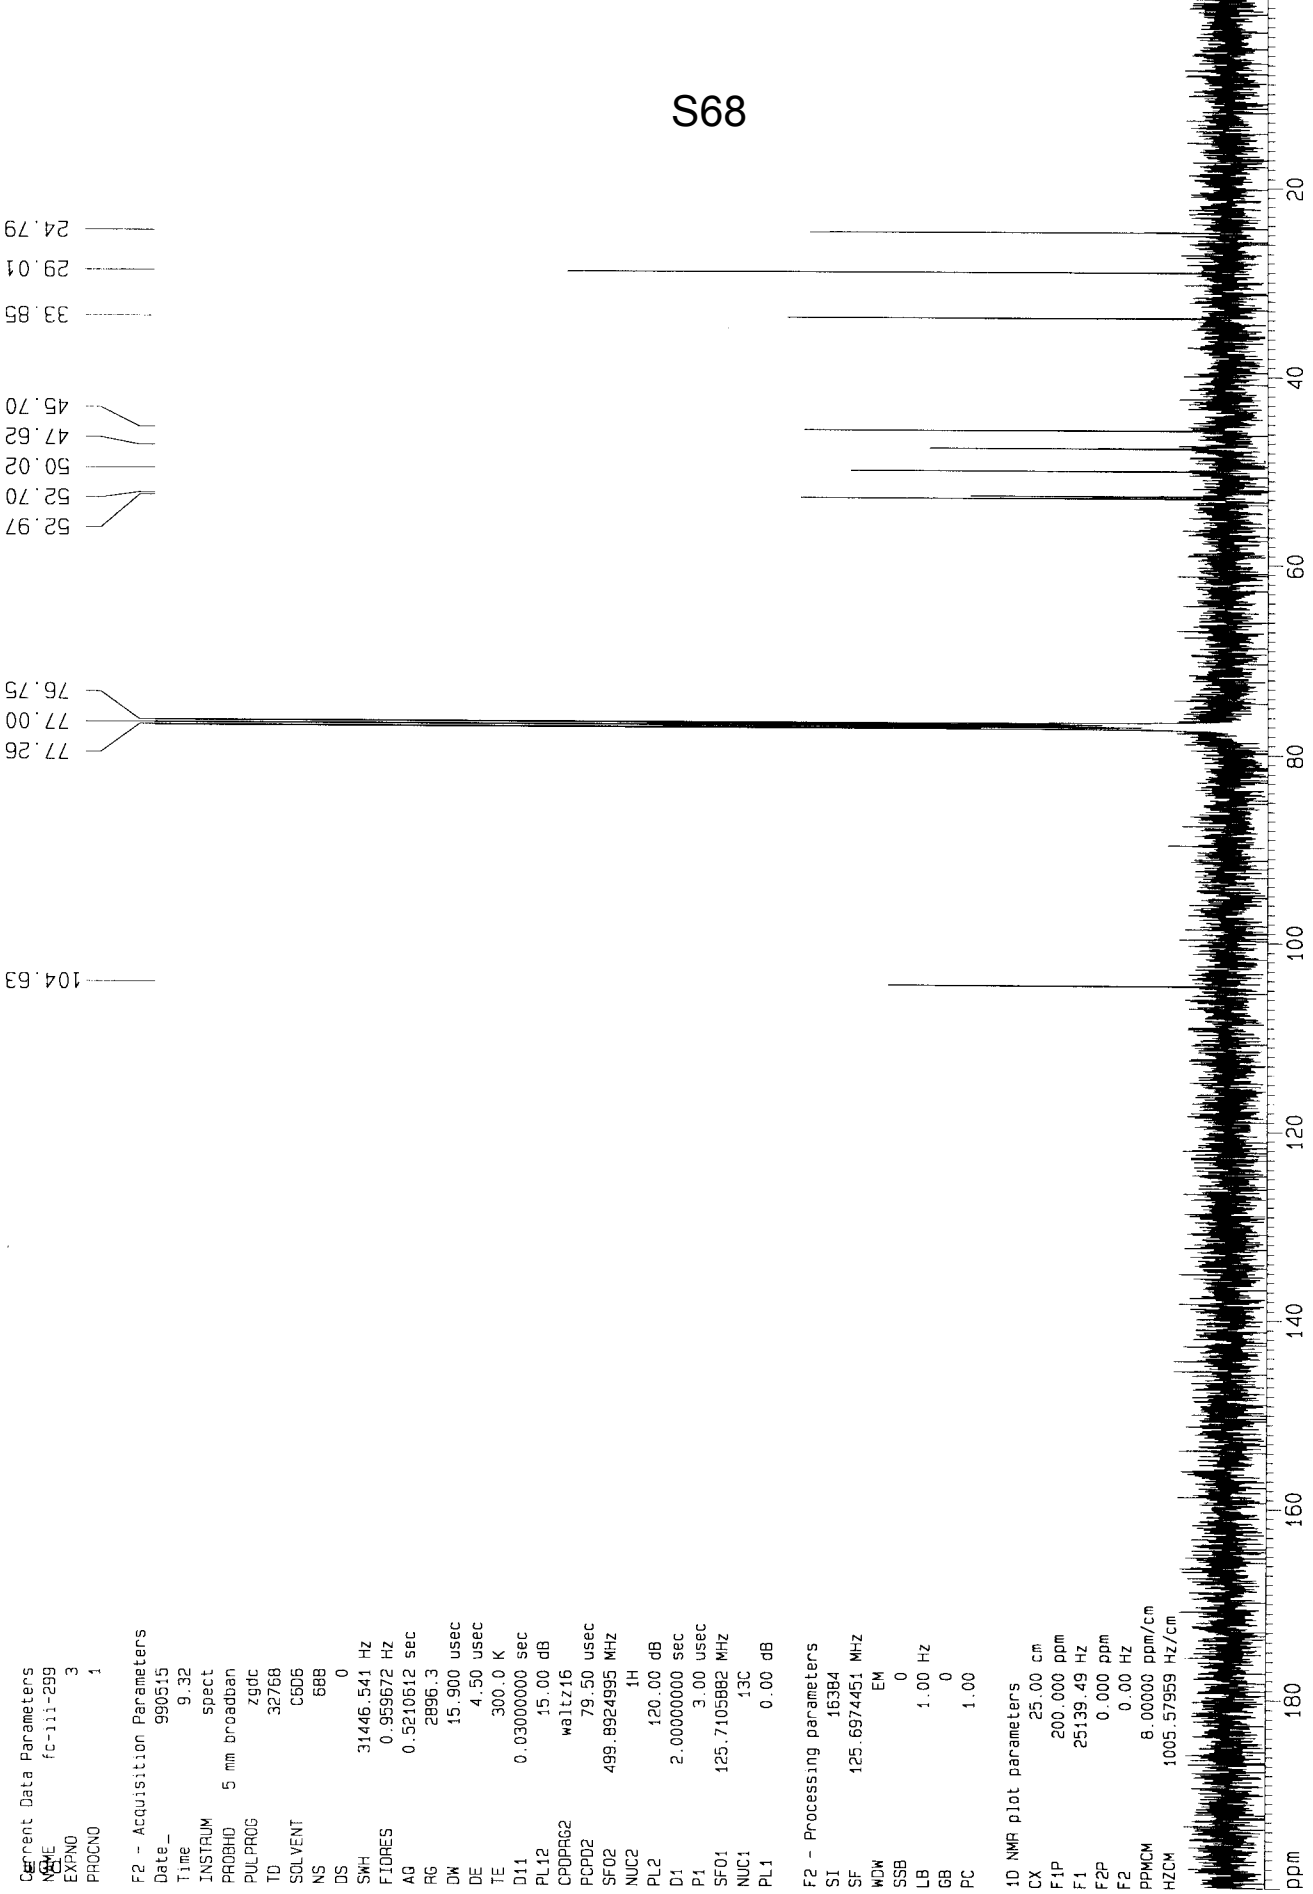

S69

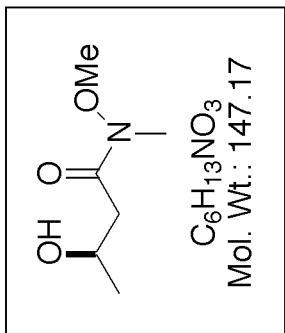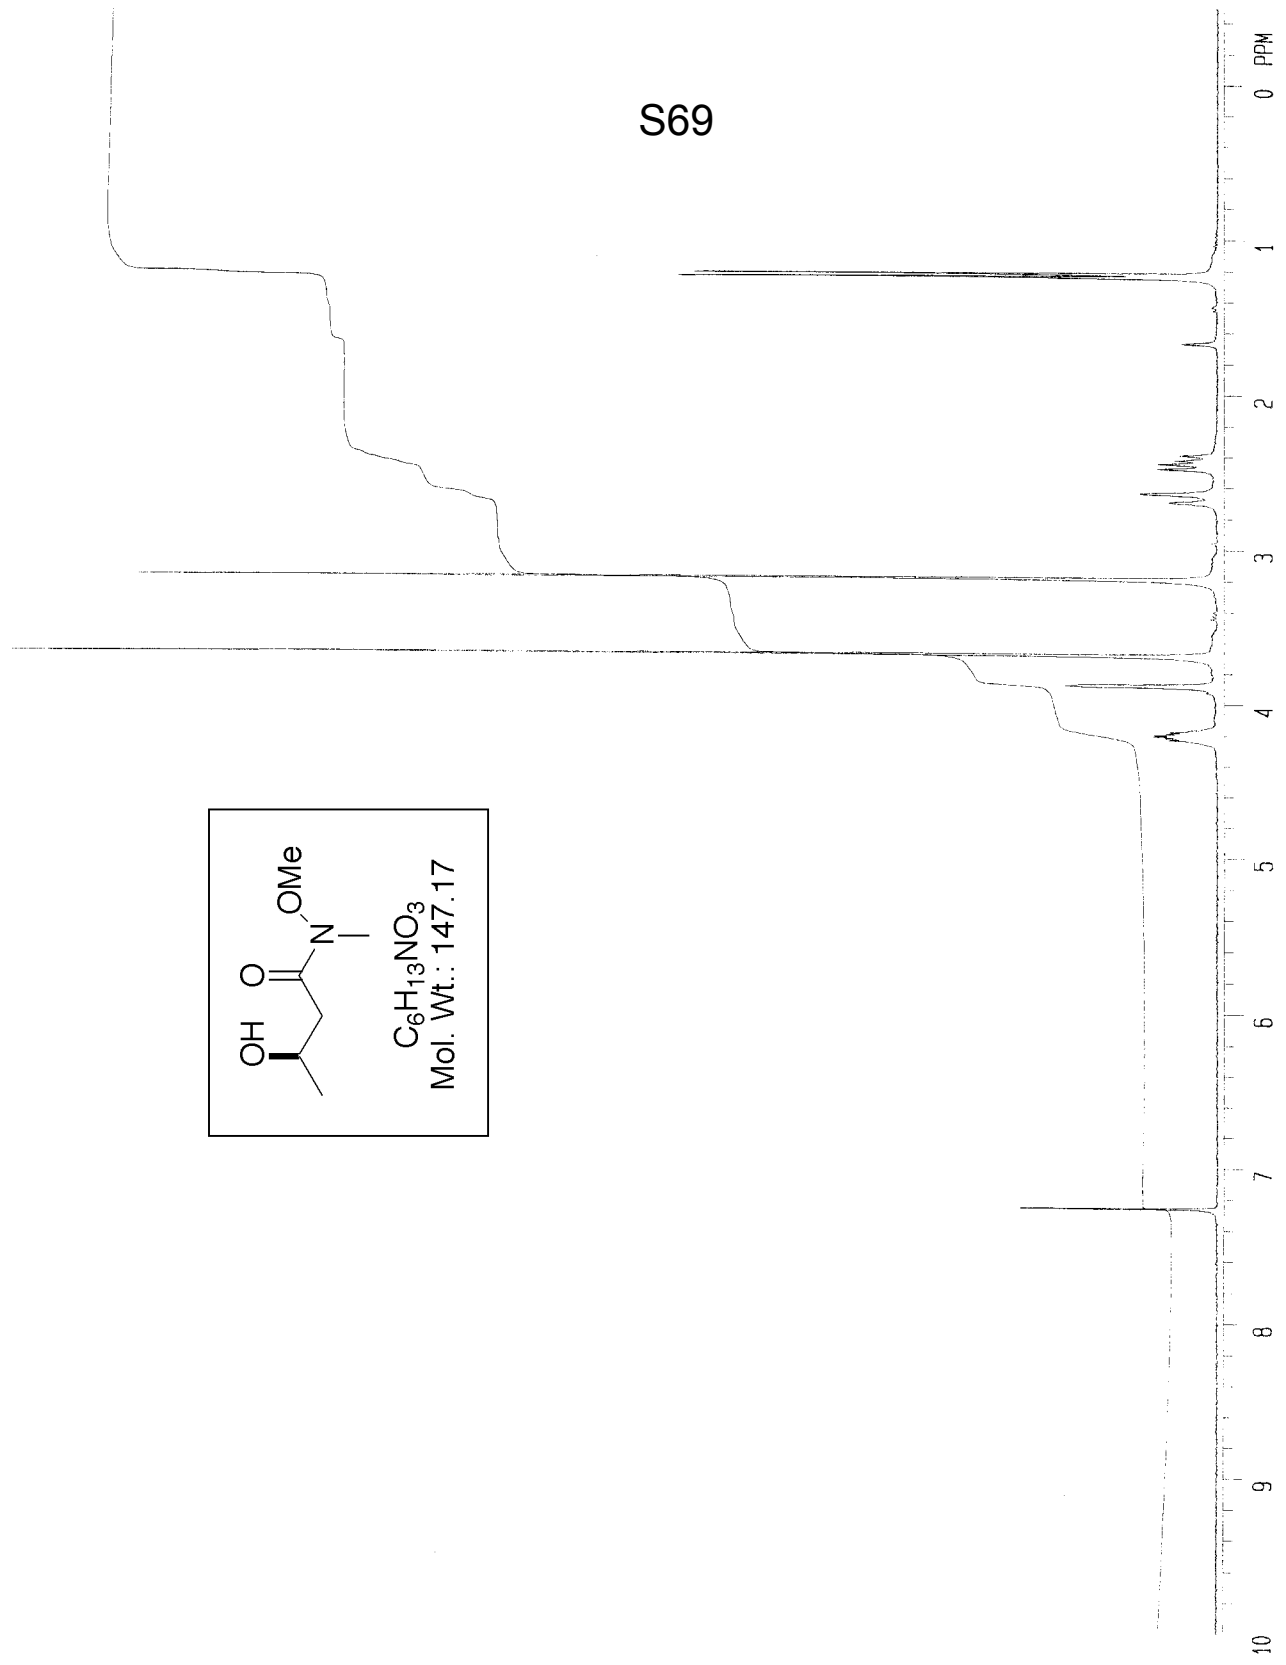



NAME  
EXPNO  
PROCNO

F2 - ACQUISITION PARAMETERS  
Date: 1997.07.17  
Time: 10.00  
PULPROG: zgpg30  
PULPROG2: zgpg30  
TD: 65536  
SOLVENT: CDCl3  
DS: 4  
SWH: 19999.999 Hz  
FIDRES: 0.278173 Hz  
AQ: 0.5827132 SEC  
RG: 6548  
DM: 1.5960 USEC  
DE: 4.00 USEC  
TE: 300.0 K  
D11: 0.0300000 SEC  
PL12: 1.700 DB  
CPODPRG2: waltz16  
PCPD2: 30.00 USEC  
SFDE: 400.136067 MHz  
NUC2: 13C  
PL1: 0.00 DB

F2 - Processing parameters  
SI: 32768  
SF: 100.6127942 MHz  
WDW: FM  
SSB: 0  
LB: 1.00 Hz  
GB: 0  
PC: 1.00

1D NMR plot parameters  
CX: 25.00 cm  
F1P: 200.000 ppm  
F1: 20122.55 Hz  
F2P: 0.000 ppm  
F2: 0.00 Hz  
PPMCM: 6.00000 ppm/cm  
HZCM: 804.50234 Hz/cm

173.3

77.3  
77.0  
76.7  
63.7  
60.9  
39.4  
31.4  
22.1

S70

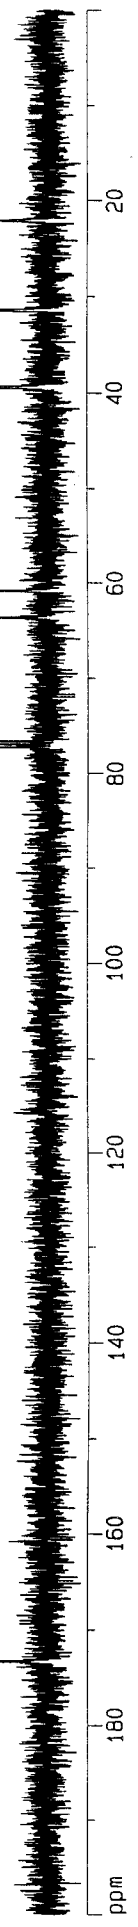

Current Data Parameters  
NAME fc-111-297  
EXPNO 2  
PROCNO 1

F2 - Acquisition Parameters

Date\_ 980515  
Time 15.01  
INSTRUM spect  
PROBHD 5 mm broadband  
PULPROG zg  
TD 32768  
SOLVENT CDCl3  
NS 16  
DS 2  
SWH 6009.615 Hz  
FIDRES 0.163399 Hz  
AQ 2.7263477 sec  
RG 128  
DW 83.200 usec  
DE 6.00 usec  
TE 300.0 K  
D1 1.0000000 sec  
P1 4.00 usec  
SFO1 499.8924955 MHz  
NUC1 1H  
PL1 0.00 dB

F2 - Processing parameters

SF 32768  
WDW EM  
SSB 0  
LB 0.30 Hz  
GB 0  
PC 1.00

1D NMR plot parameters

CX 25.00 cm  
F1P 10.000 ppm  
F1 4998.50 Hz  
F2P -0.500 ppm  
F2 -249.95 Hz  
PRMCM 0.42000 ppm/cm  
HZCM 209.39391 Hz/cm

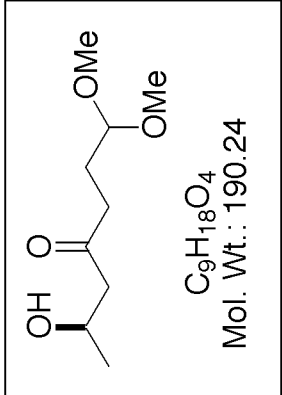

S71

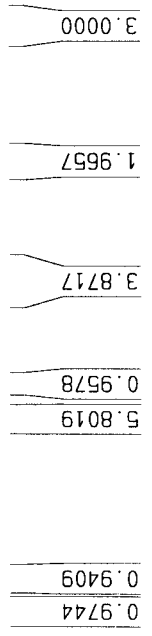

Integral

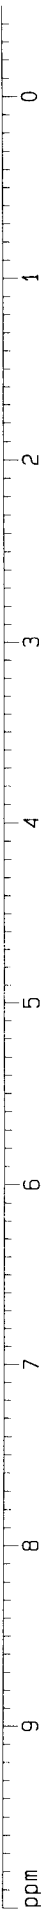

ppm

211.27

103.71

77.26  
77.00  
76.75

63.91

53.31  
53.26  
50.69

37.96

26.37  
22.35

Current Data Parameters  
NAME fc-111-297  
EXPNO 3  
PROCNO 1

F2 - Acquisition Parameters  
Date\_ 990515  
Time 15.37  
INSTRUM spect  
PROBHD 5 mm broadband  
PULPROG zgdc  
TD 32768  
SOLVENT C6D6  
NS 670  
DS 0

SWH 31446.541 Hz  
FIDRES 0.959672 Hz  
AQ 0.5210612 sec  
RG 2896.3  
DM 15.900 usec  
DE 4.50 usec  
TE 300.0 K

Df1 0.03000000 sec  
PL12 15.00 dB  
CPOPRG2 waltz16  
PCPO2 79.50 usec  
SFO2 499.8924995 MHz  
NUC2 1H

PL2 120.00 dB  
D1 2.50000000 sec  
P1 3.00 usec  
SFO1 125.7105882 MHz  
NUC1 13C  
PL1 0.00 dB

F2 - Processing parameters  
SI 16384  
SF 125.6974470 MHz  
WDW no  
SSB 0  
LB 0.00 Hz  
GB 0  
PC 1.00

1D NMR plot parameters  
CX 25.00 cm  
F1P 220.000 ppm  
F1 27653.44 Hz  
F2P 0.000 ppm  
F2 0.00 Hz  
PPMCM 8.80000 ppm/cm  
HZCM 1106.13757 Hz/cm

S72

ppm

200

180

160

140

120

100

80

60

40

20

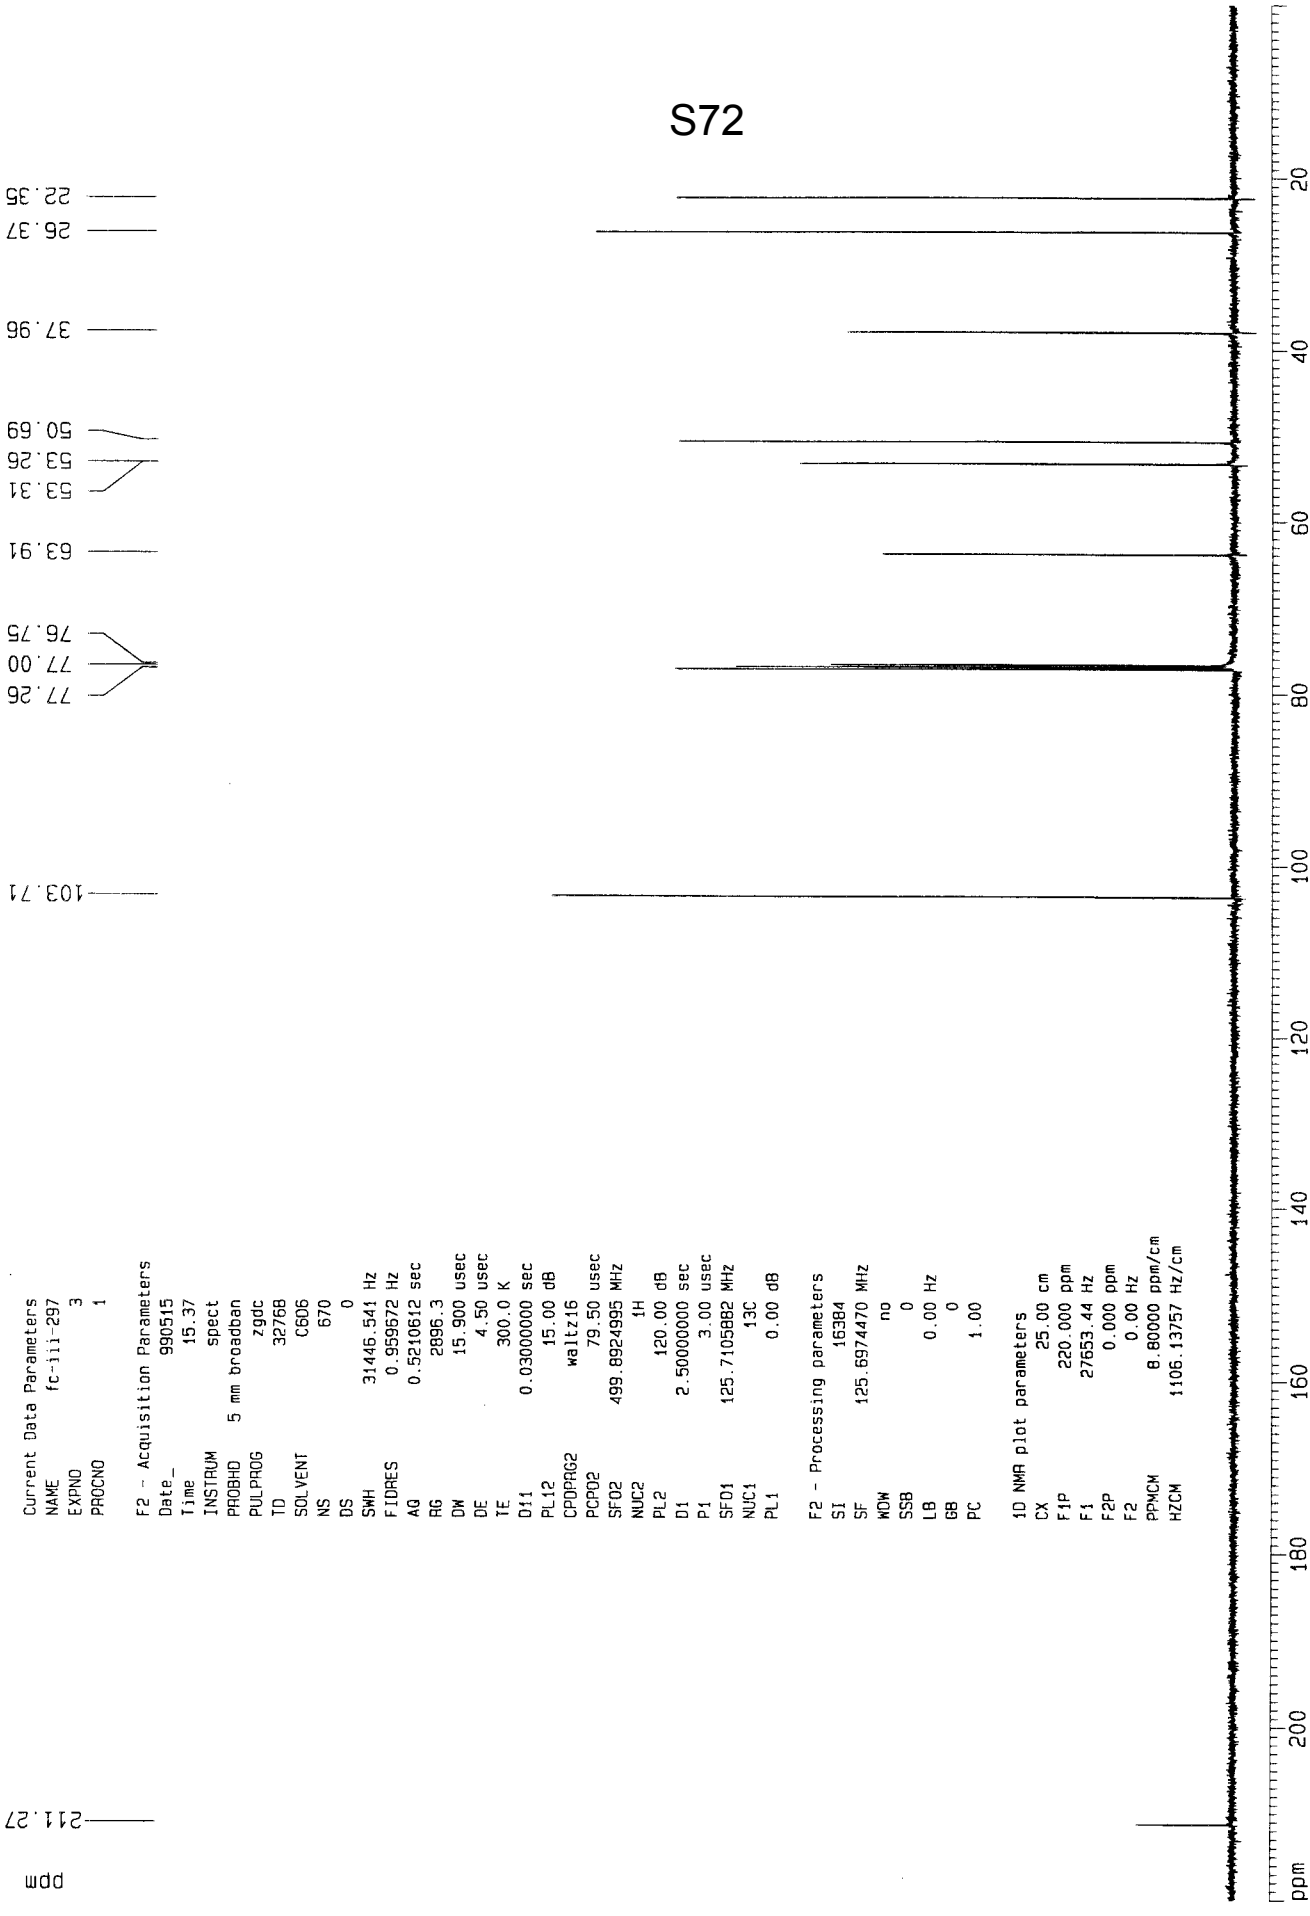

S73

Current Data Parameters

NAME: FC-111-287  
EXPNO: 4  
PROCNO: 1

F2 - Acquisition Parameters

Date\_: 990502  
Time: 17.40  
INSTRUM: spect  
PROBHD: 5 mm GNP 1H  
PULPROG: zg30  
TD: 16384  
SOLVENT: CDCl3  
NS: 16  
DS: 2  
SWH: 4789.272 Hz  
FIDRES: 0.292314 Hz  
AQ: 1.7105396 sec  
RG: 322.5  
DM: 104.400 usec  
DE: 4.50 usec  
TE: 300.0 K  
D1: 1.00000000 sec  
P1: 4.00 usec  
SFO: 400.132007 MHz  
NUC1: 1H  
PL1: 0.00 dB

F2 - Processing parameters

SF: 32768  
WDW: EM  
SSB: 0  
LB: 0.30 Hz  
GB: 0  
PC: 1.00

1D NMR plot parameters

CX: 25.00 cm  
F1P: 10.000 ppm  
F1: 4001.30 Hz  
F2P: -0.500 ppm  
F2: -200.07 Hz  
P1P1CM: 0.42000 ppm/cm  
HZCM: 168.05460 Hz/cm

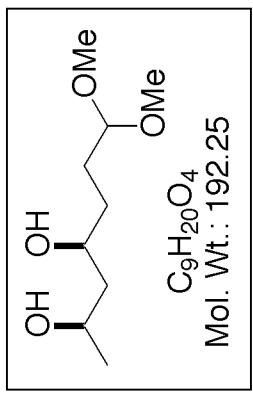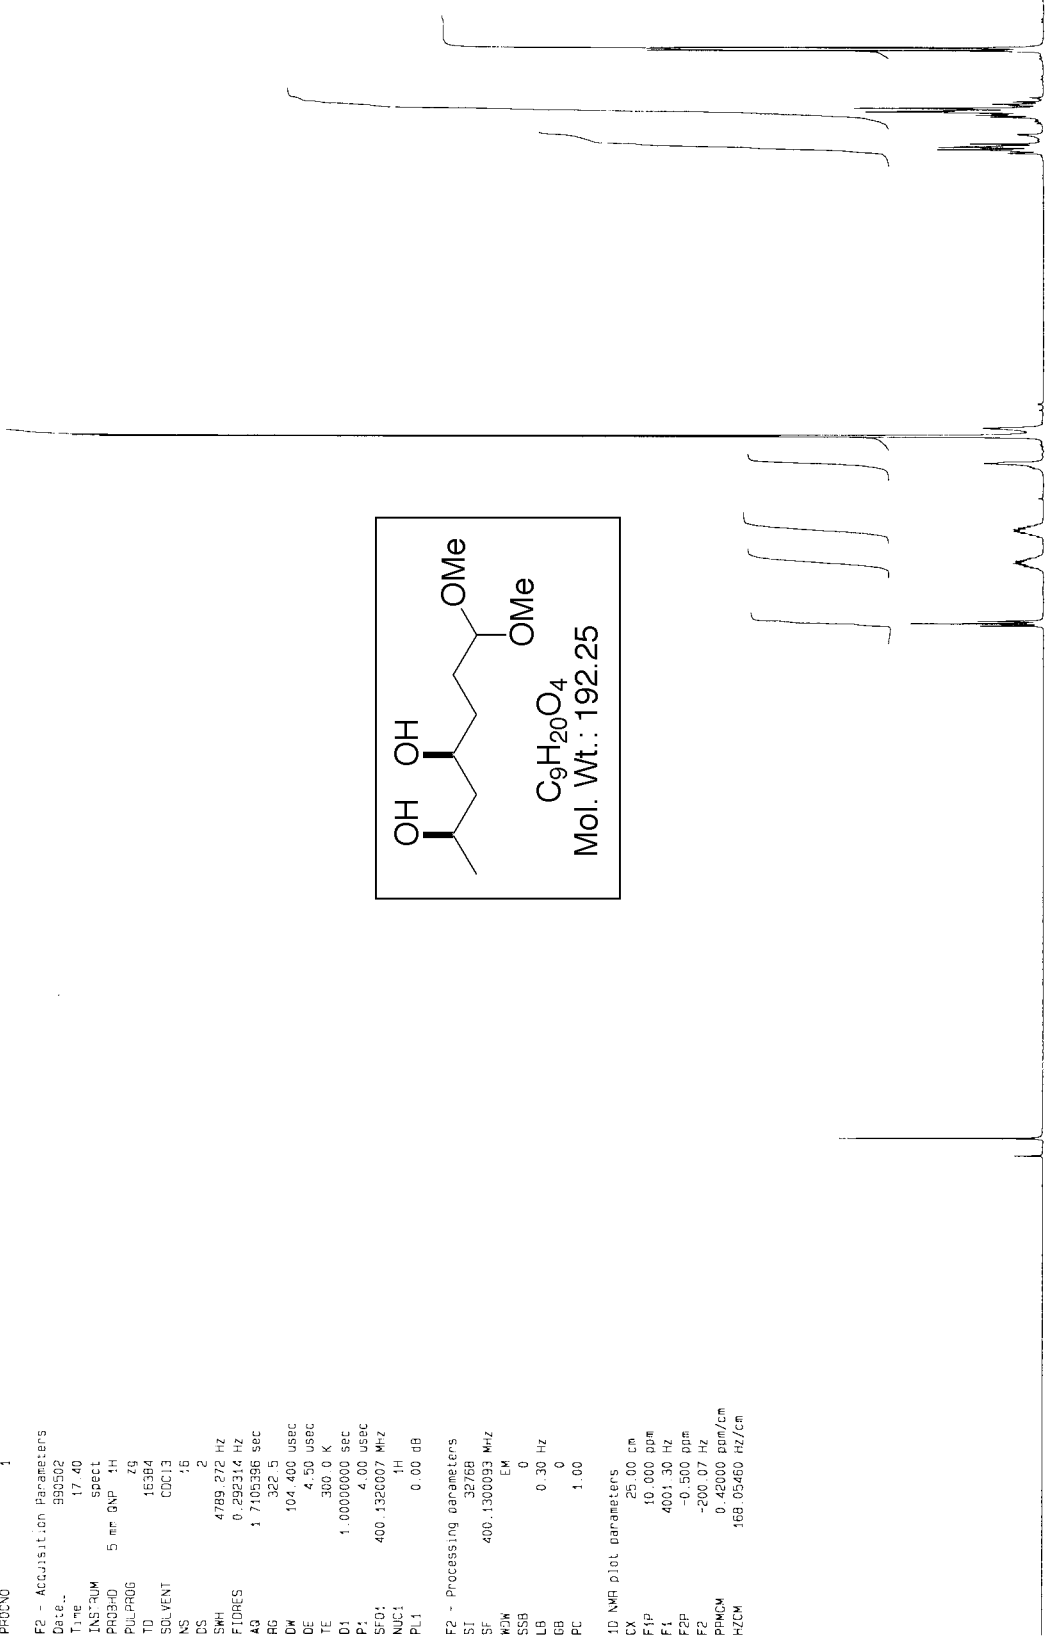

|       |
|-------|
| 0.925 |
| 0.946 |
| 0.976 |
| 0.948 |
| 6.710 |
| 2.350 |
| 4.042 |
| 3.000 |

Integral

ppm 0 1 2 3 4 5 6 7 8 9 10



Current Data Parameters  
 NAME fc-iv-013  
 EXPNO 2  
 PROCNO 1

F2 - Acquisition Parameters

Date\_ 990602  
 Time\_ 12.33  
 INSTRUM spect  
 PROBHD 5 mm broadband  
 PULPROG zg  
 TD 32768  
 SOLVENT CDCl3  
 NS 16  
 DS 2  
 SWH 6009.615 Hz  
 FIDRES 0.1483569 Hz  
 AQ 2.7263477 sec  
 RG 32  
 DM 83.200 usec  
 DE 6.00 usec  
 TE 300.0 K  
 D1 1.00000000 sec  
 P1 4.00 usec  
 SF01 499.8824995 MHz  
 NUC1 <sup>1</sup>H  
 PL1 0.00 dB

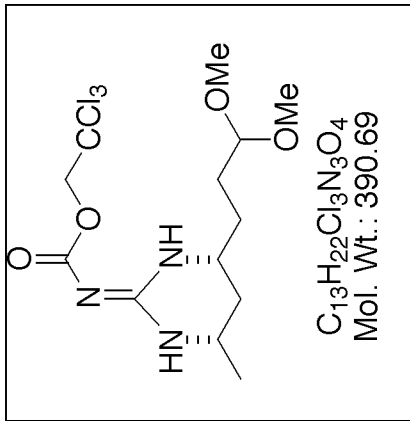

F2 - Processing parameters

SF 32768  
 SF 499.8900172 MHz  
 WDW EM  
 SSB 0  
 LB 0.30 Hz  
 GB 0  
 PC 1.00

1D NMR plot parameters

CX 25.00 cm  
 F1P 8.500 ppm  
 F1 4249.06 Hz  
 F2P -0.500 ppm  
 F2 -248.95 Hz  
 PPMCK 0.36000 ppm/cm  
 HZCK 179.96040 Hz/cm

S75

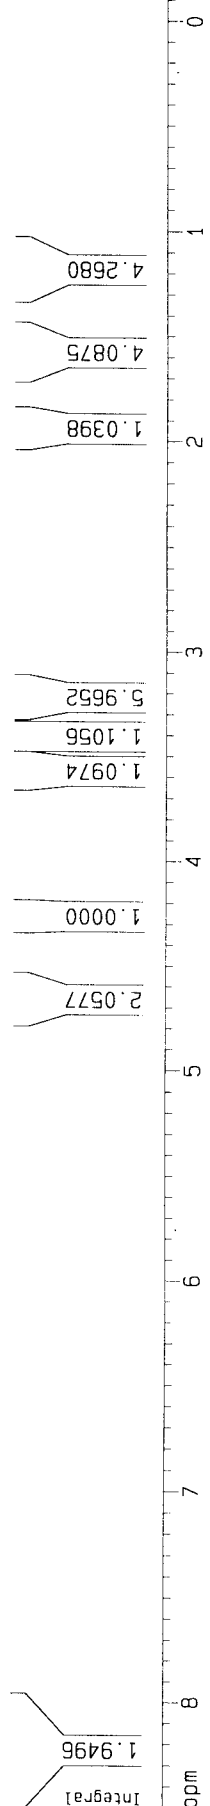

S76

Current Data Parameters  
NAME fc-iv-013  
EXPNO 3  
PROCNO 1

F2 - Acquisition Parameters  
Date\_ 990602  
Time 12.41  
INSTRUM spect  
PROBHD 5 mm broadband  
PULPROG zgpg  
TD 32768  
SOLVENT C6D6  
NS 231  
DS 0  
SWH 31446.541 Hz  
FIDRES 0.959672 Hz  
AQ 0.5210612 sec  
RG 2896.3  
DW 15.900 usec  
DE 4.50 usec  
TE 300.0 K  
D11 0.03000000 sec  
PL12 15.00 dB  
CPDPRG2 waitz16  
PCPD2 79.50 usec  
SF02 499.8924995 MHz  
NUC2 1H  
PL2 120.00 dB  
D1 2.00000000 sec  
P1 3.00 usec  
SF01 125.7105882 MHz  
NUC1 13C  
PL1 0.00 dB

F2 - Processing parameters  
SI 16384  
SF 125.6974643 MHz  
WDW EM  
SSB 0  
LB 1.00 Hz  
GB 0  
PC 1.00

1D NMR plot parameters  
CX 25.00 cm  
F1P 200.000 ppm  
F1 25139.49 Hz  
F2P 0.000 ppm  
F2 0.00 Hz  
PPMCM 8.00000 ppm/cm  
HZCM 1005.57971 Hz/cm

161.49  
158.87  
103.87  
96.09  
77.25  
77.00  
76.74  
74.31  
52.98  
52.76  
49.32  
45.16  
35.31  
30.09  
27.95  
21.41

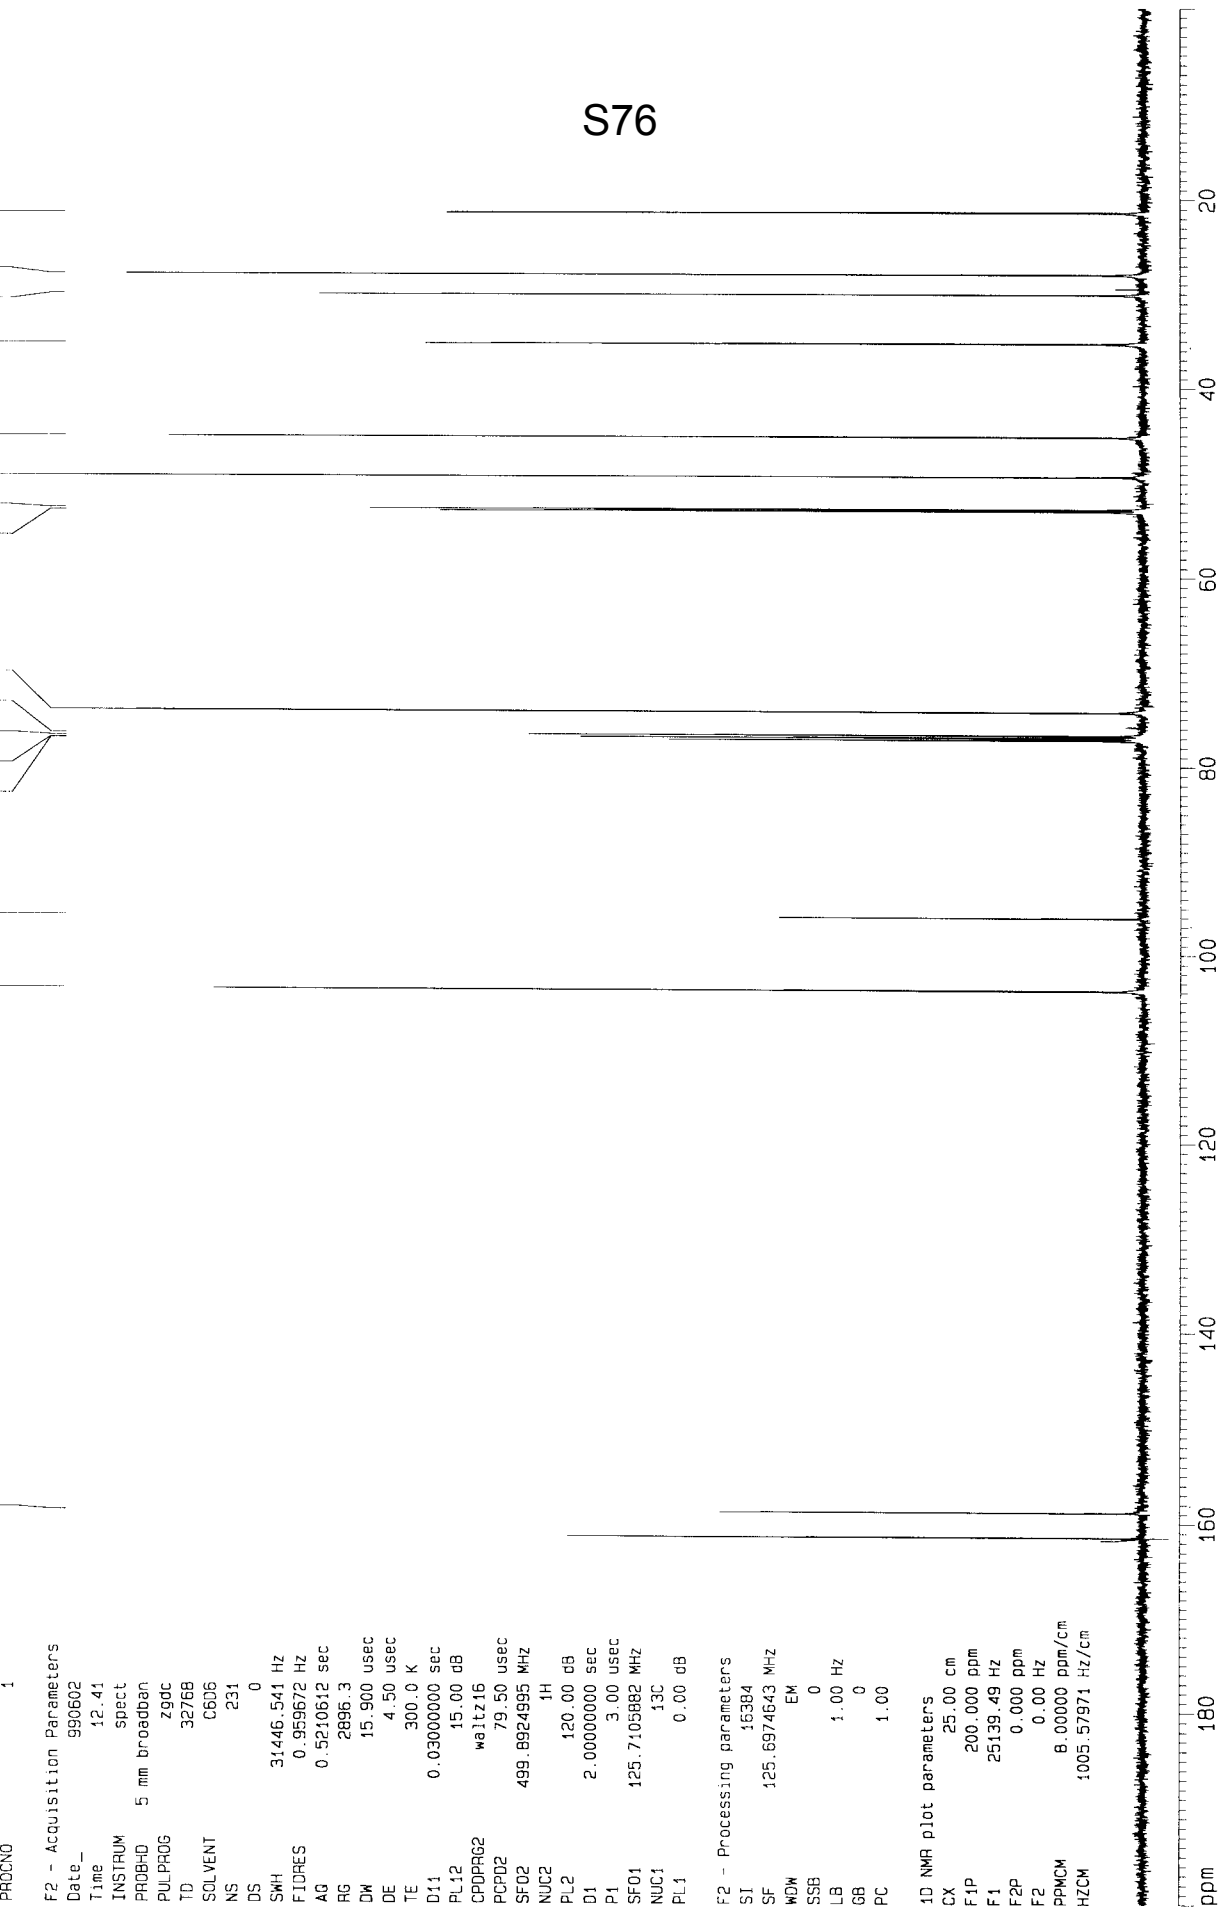

Current Data Parameters  
 NAME: 10-17-112  
 EXPNO: 1  
 PROCNO: 1

F2 - Acquisition Parameters  
 Date: 20090614  
 Time: 9:02  
 INSTRUM: spect  
 PROBHD: 5 mm QNP 1H  
 PULPROG: zg  
 TD: 65536  
 SOLVENT: CDCl3  
 NS: 32  
 DS: 2  
 SWH: 4789.272 Hz  
 FIDRES: 0.292374 Hz  
 AQ: 1.7103396 sec  
 RG: 574.7  
 DW: 104.400 usec  
 DE: 4.50 usec  
 TE: 300.0 K  
 D1: 1.0000000 sec

\*\*\*\*\* CHANNEL f1 \*\*\*\*\*  
 NUC1: 1H  
 P1: 4.00 usec  
 PL1: 0.00 dB  
 SF01: 400.1320007 MHz

F2 - Processing parameters  
 SI: 32768  
 SF: 400.1300095 MHz  
 MDW: EM  
 SSB: 0  
 LB: 0.30 Hz  
 GB: 0  
 PC: 1.00

1D NMR plot parameters  
 CX: 25.00 cm  
 F1P: 10.000 ppm  
 F1: 4001.30 Hz  
 F2P: -0.500 ppm  
 F2: -200.07 Hz  
 PPMCM: 0.42000 ppm/cm  
 HZCM: 168.05460 Hz/cm

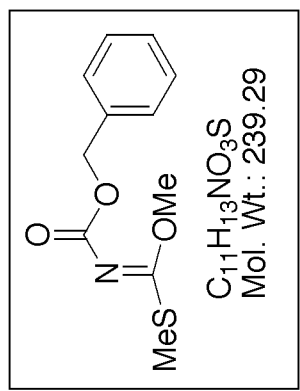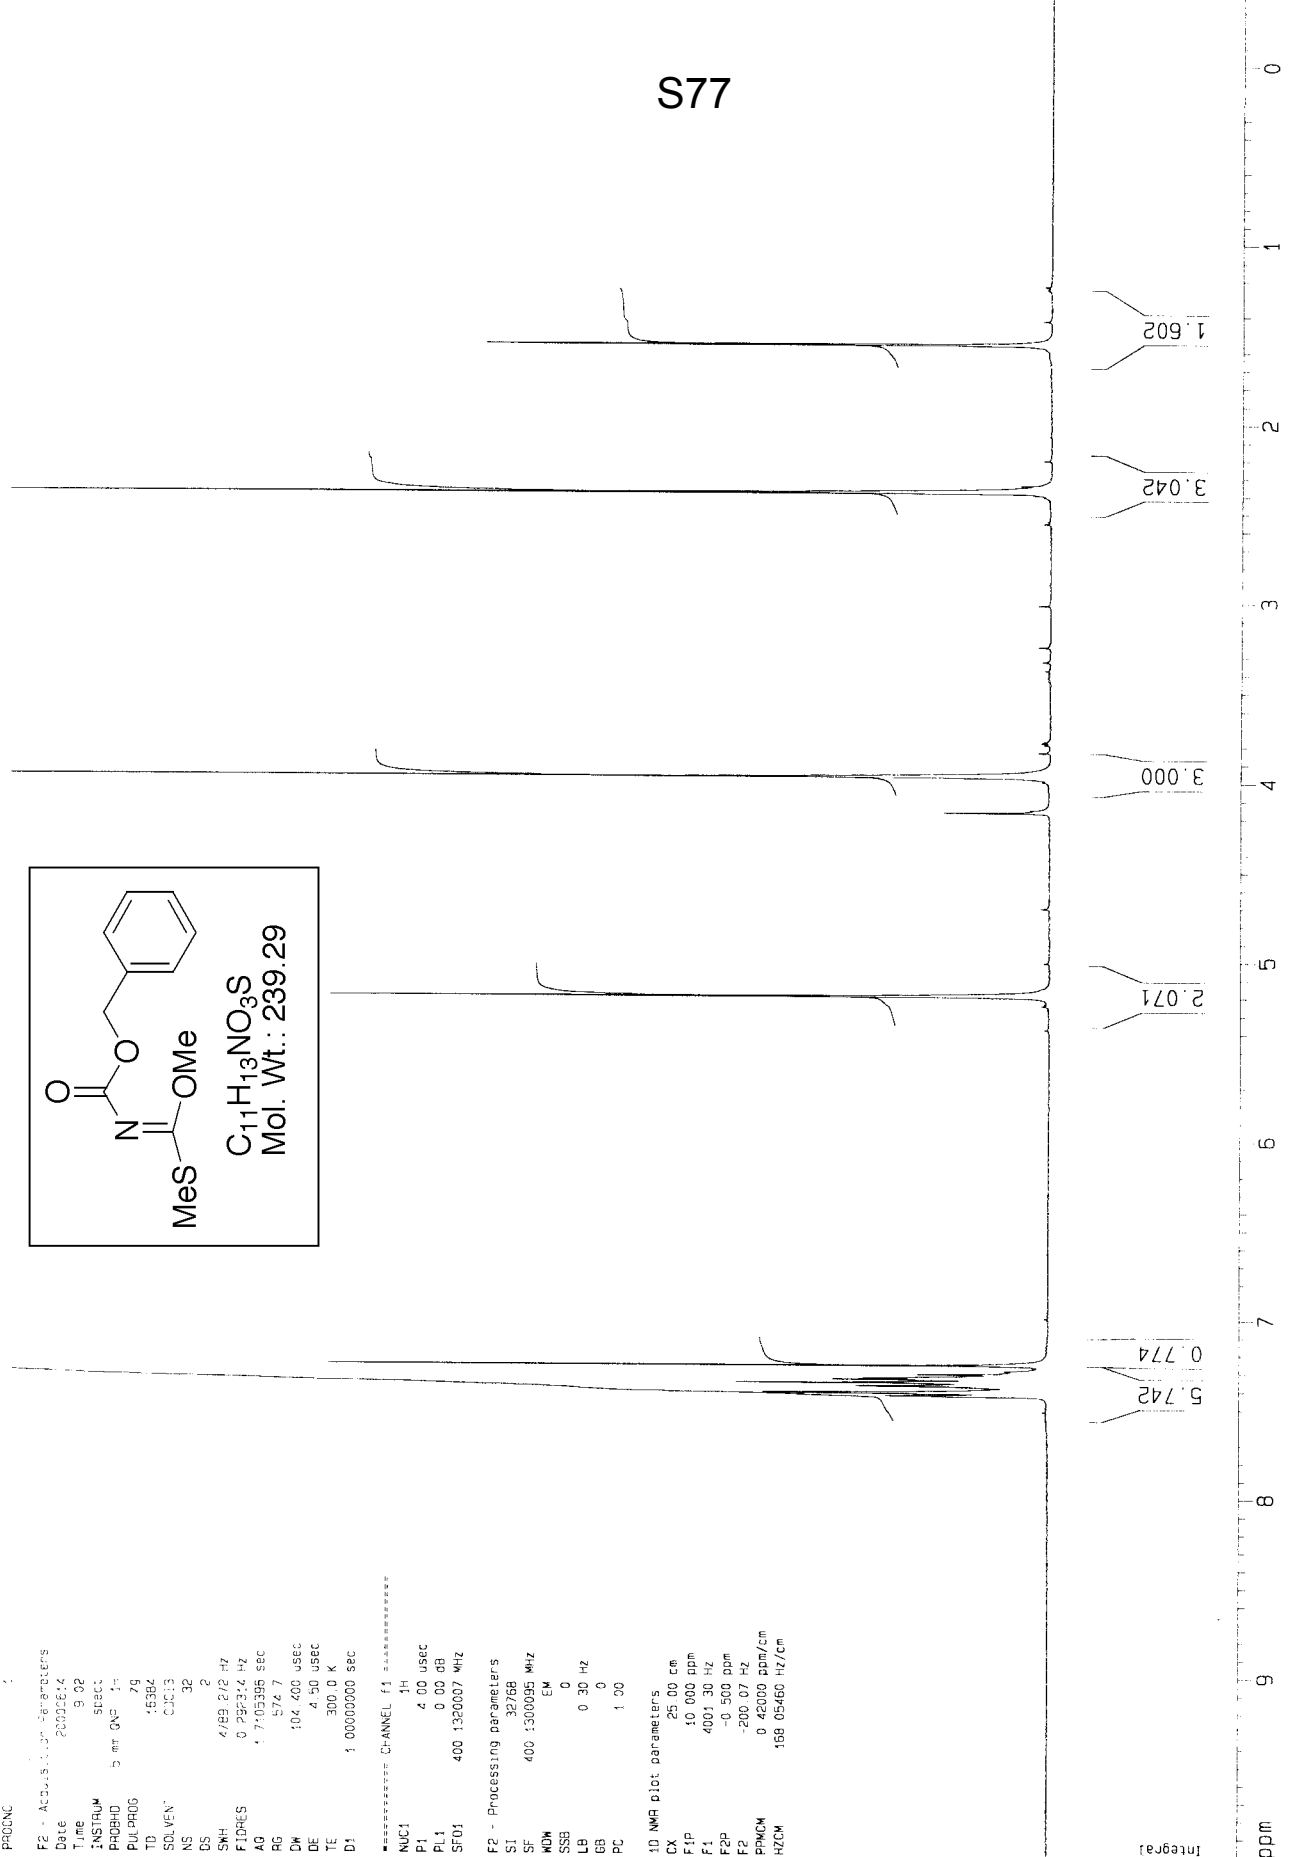

S77



ppm

13.87

57.65

58.49

68.10

76.74

76.99

77.25

128.20

128.46

128.52

135.96

160.57

168.10

76.74

76.99

77.25

58.49

57.65

13.87

13.87

13.87

13.87

13.87

13.87

13.87

13.87

13.87

13.87

13.87

13.87

13.87

13.87

13.87

13.87

13.87

# S78

```

NAME: 1
EXPNO: 1
PROCNO: 1
PROCNAME: 1
F2:
F3:
AQ: 0.02000000 SEC
RG: 327.68
SF: 125.760463 MHz
WDW: EM
SSB: 0
LB: 1.00 Hz
GB: 0
CB: 0
PC: 1.00
ID: NMR 0101 Parameters
CX: 23.00 cm
FID: 200.000 ppm
F1: 25156.09 Hz
F2: 0.000000 ppm
F3: 0.000000 ppm
P0: 8.65655 ppm/cm
P1: 1033.74280 Hz/cm
P2:
P3:

```

```

===== CHANNEL f1 =====
NUC1: 13C
P1: 3.000000 dB
NUC2:
P2: 0.000000 dB
SF1: 125.760463 MHz
===== CHANNEL f2 =====
CPDPRG2: waltz16
NUC1: 1H
P1: 0.000000 dB
P2: 0.000000 dB
SF2: 500.135420 MHz
===== PROCESSING PARAMETERS =====
SI: 32768
SF: 125.760463 MHz
WDW: EM
SSB: 0
LB: 1.00 Hz
GB: 0
CB: 0
PC: 1.00

```

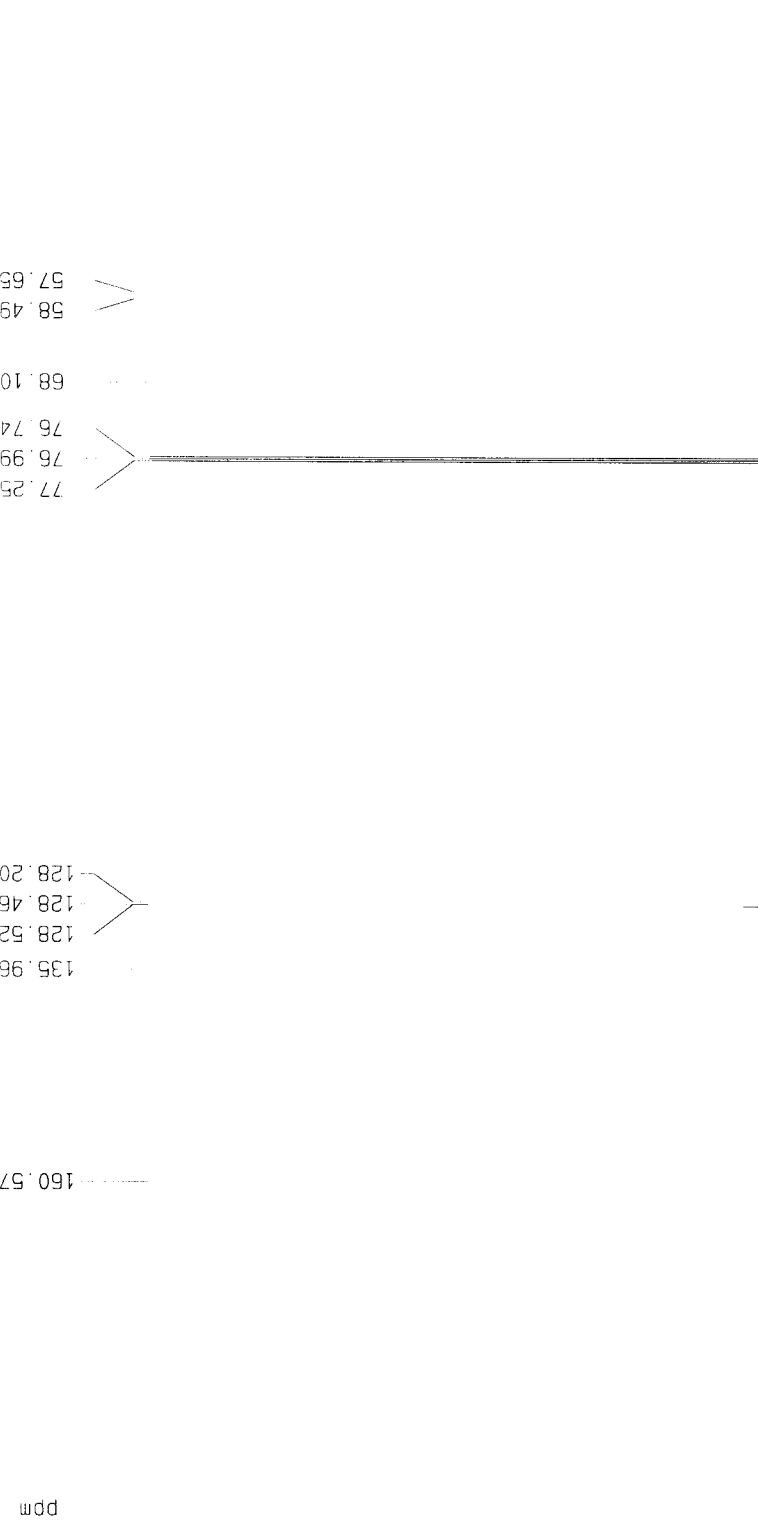

NAME: 1c-v-17  
 EXPC: 4  
 PROCN: 1

F2 - Acquisition Parameters

Date: 20000512  
 Time: 12.13  
 INSTRUM: spect  
 PROBHD: 5 mm  
 PULPROG: zg  
 C1: 153B2  
 SOLVENT: CDCl3  
 NS: 64  
 DS: 2  
 SWH: 7759.272 Hz  
 F2CH5: 0.2942314 Hz  
 AS: 1.7105198 sec  
 RG: 912.3  
 DW: 102.400 usec  
 DE: 4.50 usec  
 TE: 300.0 K  
 D0: 1.00000000 sec

----- CHANNEL f1 -----

NUC1: 1H  
 P1: 4.00 usec  
 PL1: 0.00 dB  
 SF01: 400.1320007 MHz

F2 - Processing parameters

SI: 32768  
 SF: 400.130092 MHz  
 AQW: EM  
 EN: 0  
 ZF: 0.30 Hz  
 LB: 0  
 GB: 0  
 PC: 1.00

MNR parameters

CX: 25.00 cm  
 CX3: 10.000 ppm  
 F1: 4001.30 Hz  
 F2P: -0.500 ppm  
 F2: -200.07 Hz  
 PHM0M: 0.42000 ppm/cm  
 HZCM: 188.05950 Hz/cm

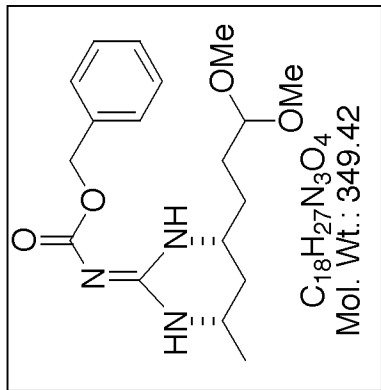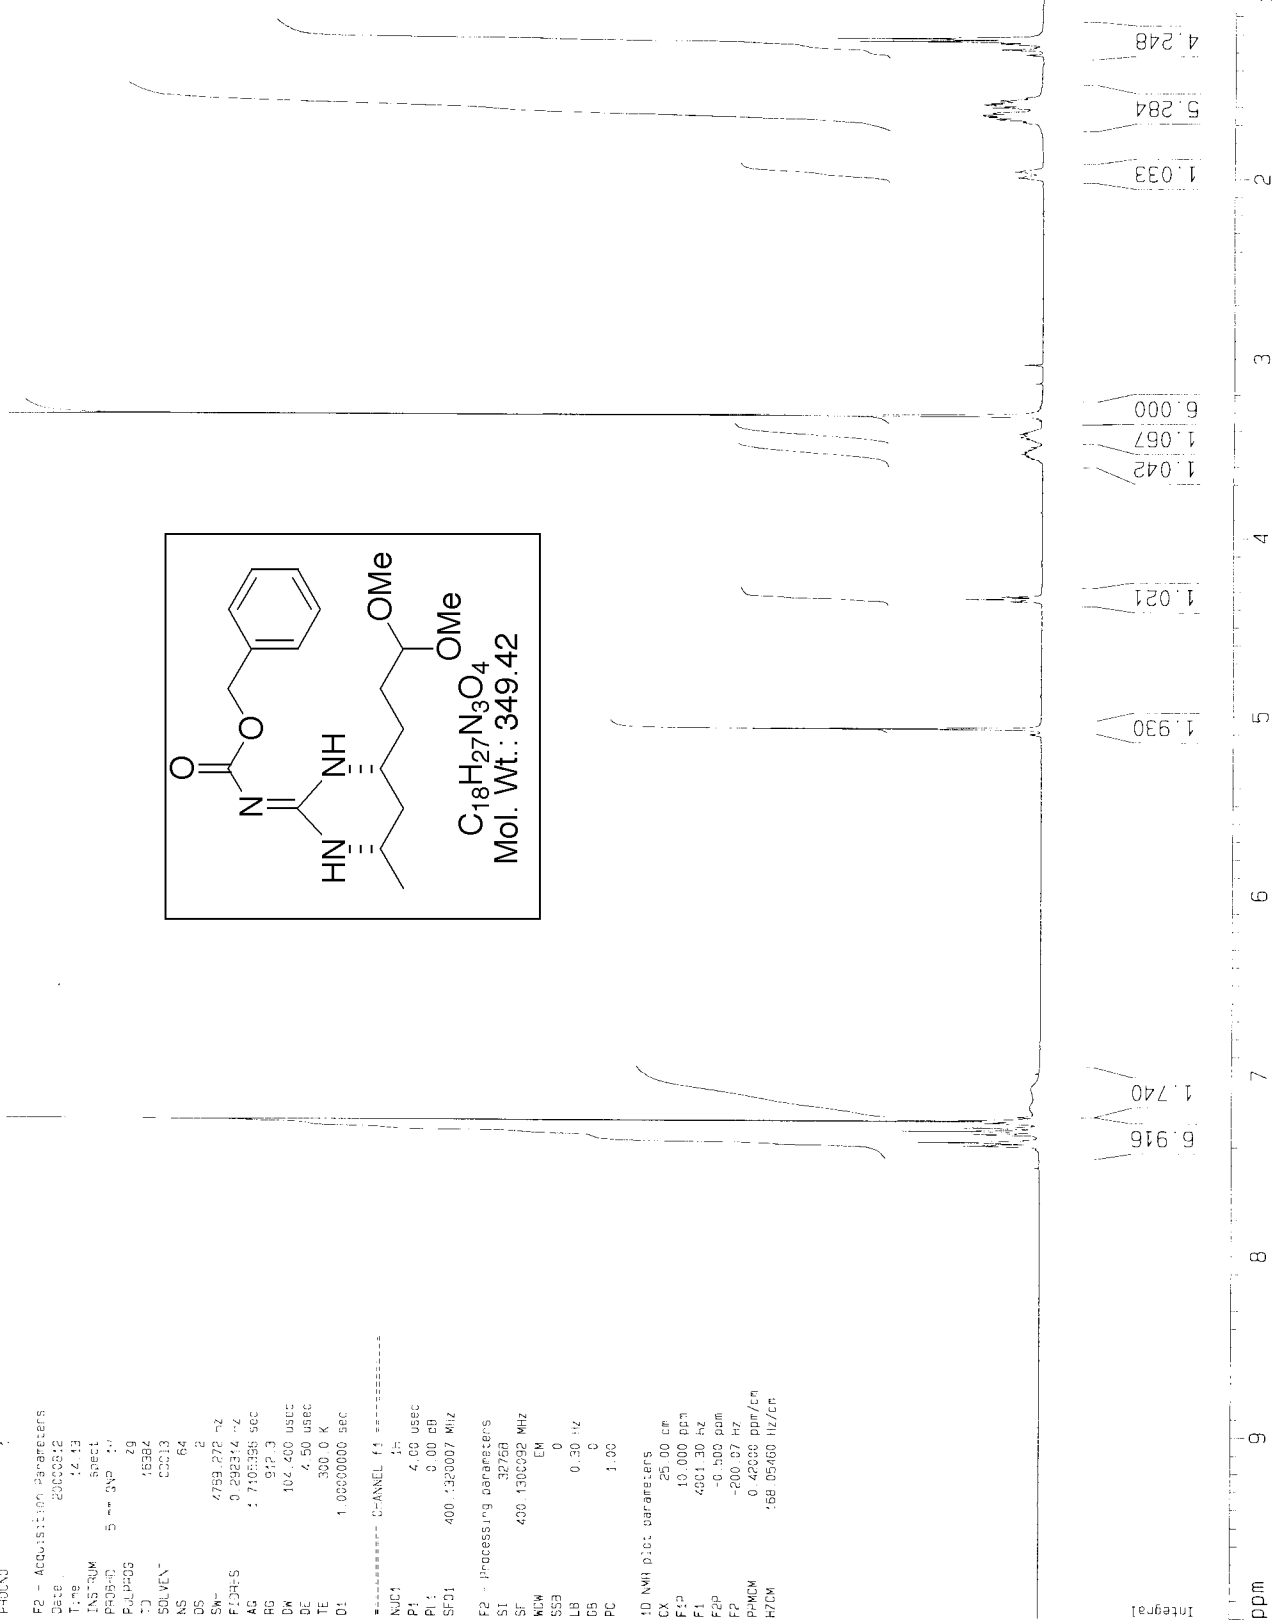



Current Data Parameters  
 NAME 1c-1v-083  
 EXPNO 2  
 PROCNO 1

F2 - Acquisition Parameters

Date\_ 990810  
 Time 9.03  
 INSTRUM spect  
 PROBHD 5 mm broadband  
 PULPROG zg  
 TD 32768  
 SOLVENT C0C13  
 NS 16  
 DS 2  
 SWH 6009.615 Hz  
 FIDRES 0.163399 Hz  
 AQ 2.7263477 sec  
 RG 128  
 DW 83.200 usec  
 DE 6.00 usec  
 TE 300.0 K  
 D1 5.00000000 sec

\*\*\*\*\* CHANNEL f1 \*\*\*\*\*

NUC1 1H  
 P1 4.00 usec  
 PL1 0.00 dB  
 SF01 499.8924995 MHz  
 F2 - Processing parameters  
 S1 32768  
 SF 499.8900170 MHz  
 NCM EM  
 SSB 0  
 LB 0.30 Hz  
 GB 0  
 PC 1.00

1D NMR plot parameters  
 CX 25.00 cm  
 F1P 10.000 ppm  
 F1 4998.90 Hz  
 F2P -0.500 ppm  
 F2 -249.95 Hz  
 PRNCM 0.42000 ppm/cm  
 HZCN 209.95381 Hz/cm

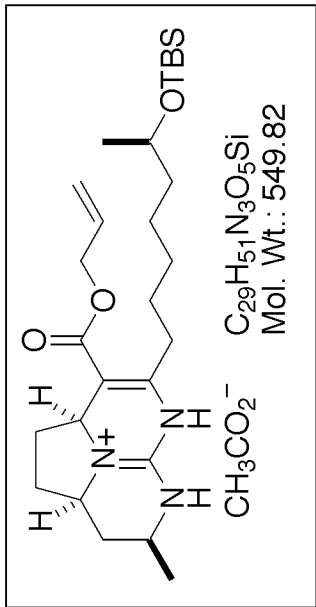

S81

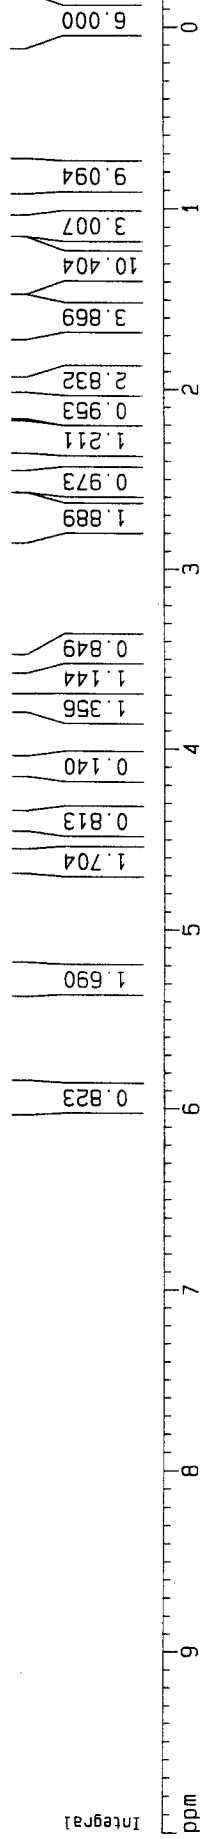

S82

-4.69  
-4.47

18.15  
19.53  
23.65  
23.78  
25.68  
25.91  
26.96  
29.51  
33.21  
35.65  
39.65  
45.36  
54.31  
55.27  
55.52  
56.98  
64.95  
65.06  
68.65  
76.75  
77.00  
77.26

99.06

118.52  
118.76

132.17

146.97

164.95

178.74

ppm

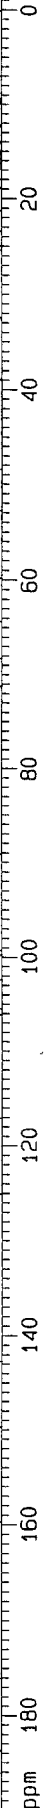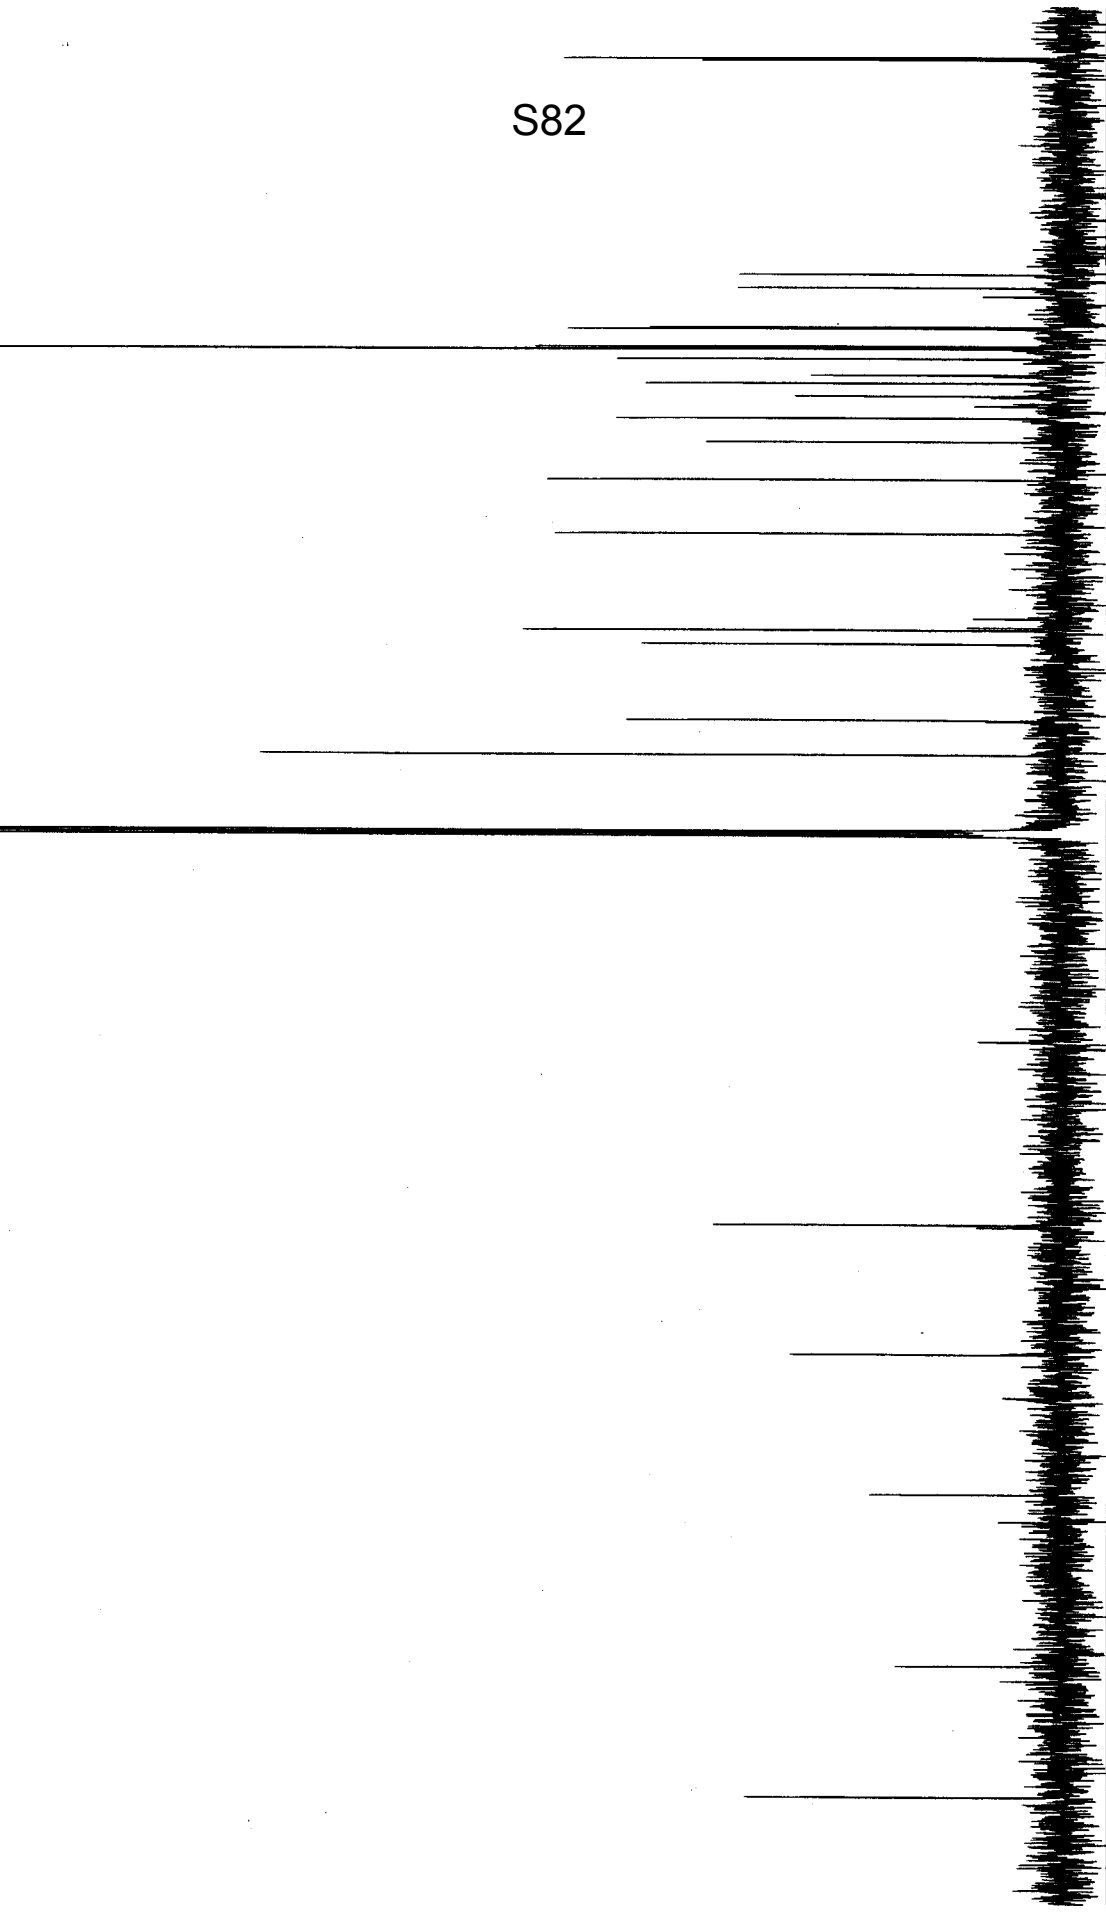

S83

3.000  
5.942  
5.424  
0.859  
0.862  
0.883

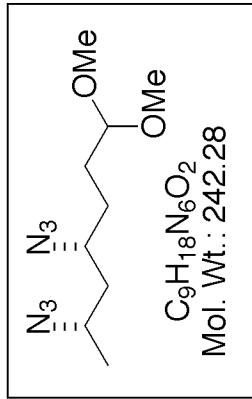

Current Data Parameters  
NAME fc-11--292  
EXPNO 2  
PROCNO 1

F2 - Acquisition Parameters  
Date\_ 990503  
Time 21.29  
INSTRUM spect  
PROBHD 5 mm QNP 1H  
PULPROG zg  
TD 16384  
SO\_VENT CDC13  
NS 16  
DS 2  
SMH 4789.272 Hz  
FIDRES 0.292514 Hz  
AQ 1.7105396 sec  
RG 322.5  
Dw 104.400 usec  
DE 4.50 usec  
TE 300.0 K  
D1 1.00000000 sec  
P1 4.00 usec  
SFO1 400.1320007 MHz  
NUC1 1H  
PL1 0.00 dB

F2 - Processing parameters  
SI 32768  
SF 400.1300093 MHz  
WDW EM  
SSB 0  
L9 0.30 Hz  
GB 0  
PC 1.00

1D NMR plot parameters  
CX 25.00 cm  
F1P 10.000 p8m  
F1 4001.30 Hz  
F2P -0.500 p8m  
F2 -200.07 Hz  
PPHMC 0.42000 p8m/cm  
HZCM 168.05460 Hz/cm

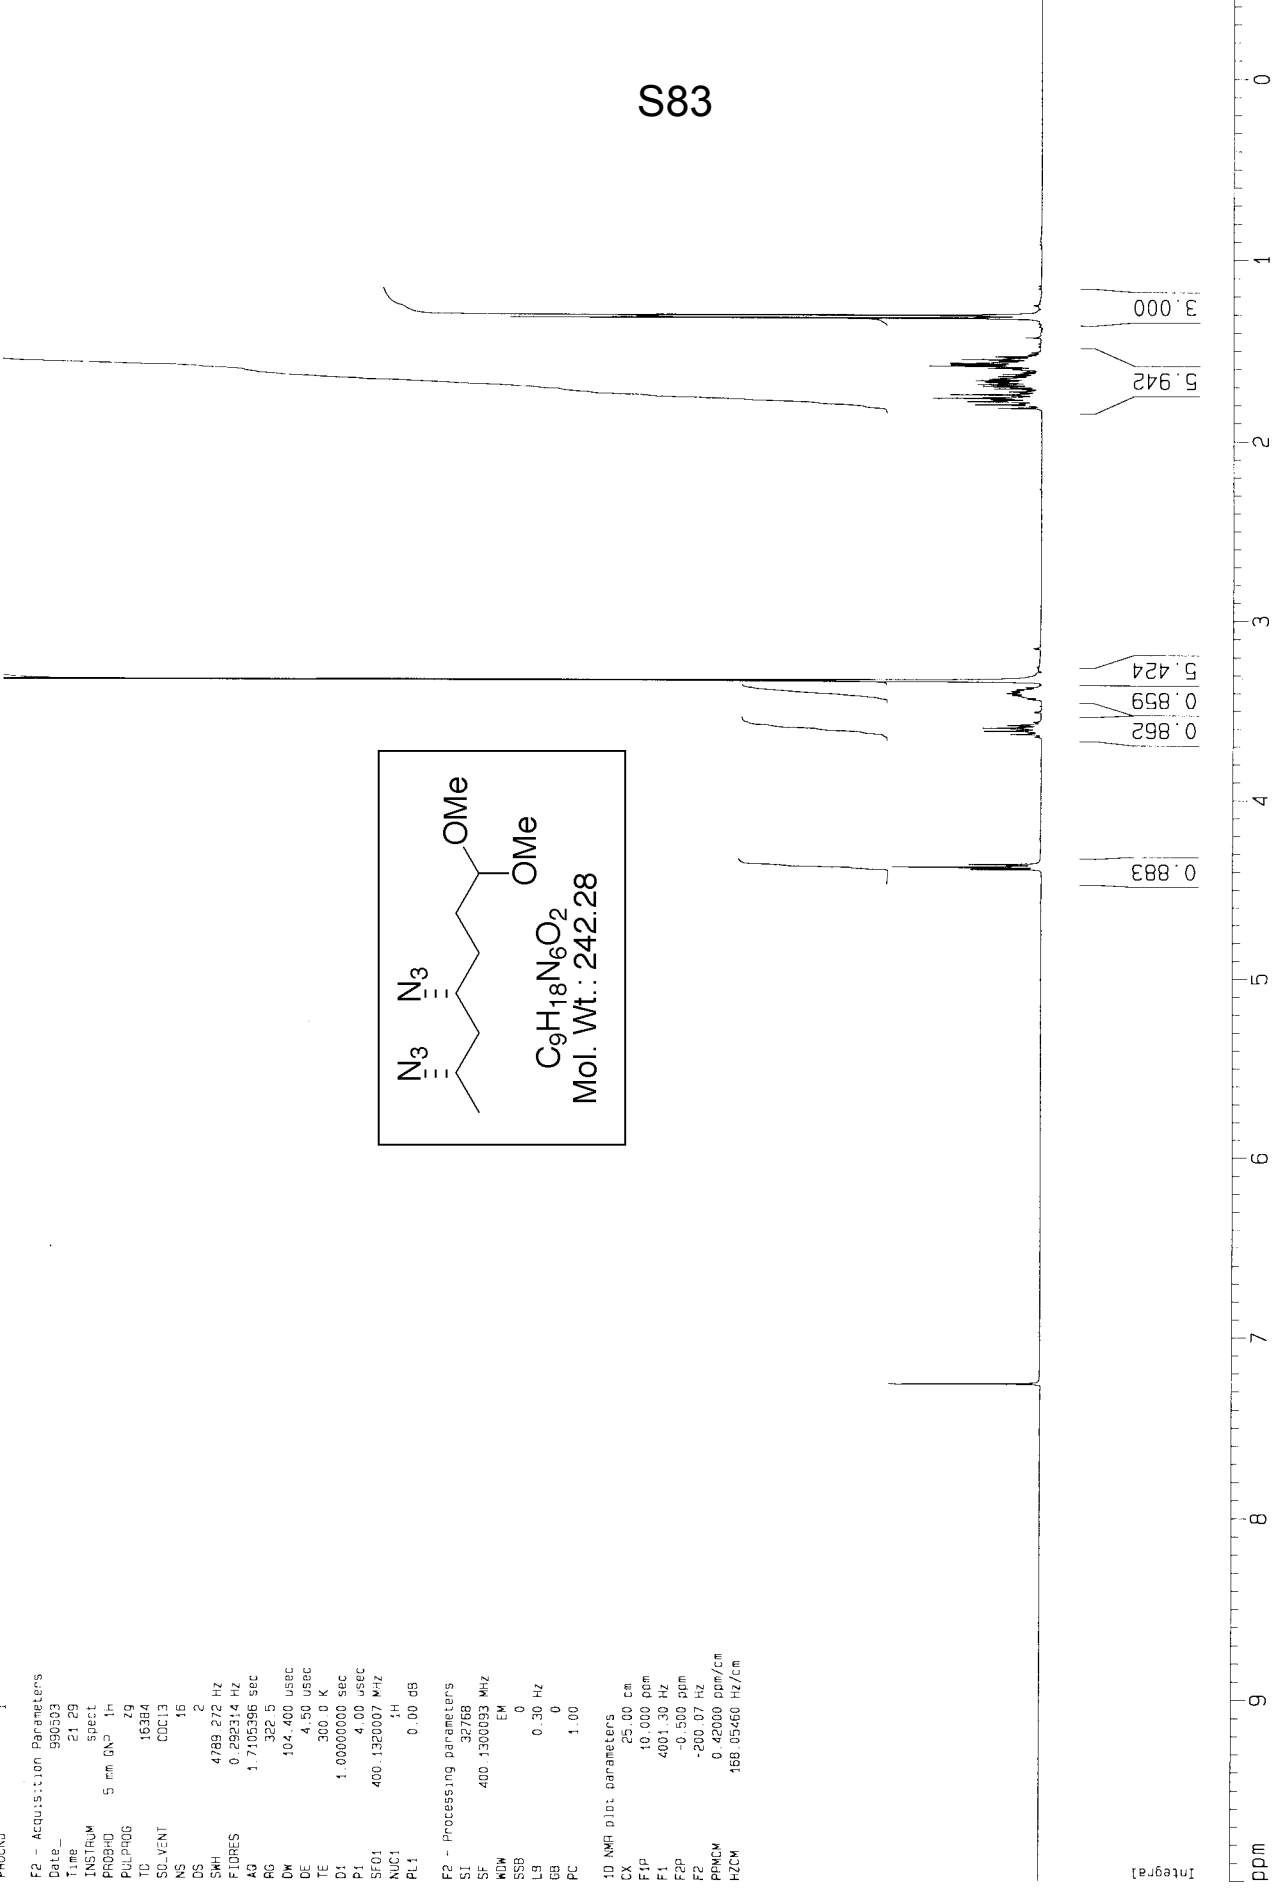

Integral



Current Data Parameters  
 USER fcohen  
 NAME fc-v-205  
 EXPNO 1  
 PROCNO 1

F2 - Acquisition Parameters  
 Date\_ 20001208  
 Time 12.14  
 INSTRUM spect  
 PROBM 5 mm QNP 1H  
 PULPROG zgpg30  
 TO 65536  
 SOLVENT CDCl3  
 NS 32  
 DS 2  
 SWH 6410.256 Hz  
 FIDRES 0.097813 Hz  
 AQ 5.1118579 sec  
 RG 456.1  
 DW 78.000 usec  
 DE 4.50 usec  
 TE 300.0 K  
 D1 0.10000000 sec

\*\*\*\*\* CHANNEL f1 \*\*\*\*\*  
 NUC1 1H  
 P1 12.00 usec  
 PL1 0.00 dB  
 SF01 400.1328009 MHz

F2 - Processing parameters  
 SI 65536  
 SF 400.1300215 MHz  
 SW 6400  
 SFO 400.1328009 MHz  
 LB 0.30 Hz  
 GB 0  
 PC 2.00

1D NMR plot parameters  
 CX 22.80 cm  
 FIP 10.000 ppm  
 F1 4001.30 Hz  
 F2 -0.500 ppm  
 F2 -200.07 Hz  
 PPMCM 0.46053 ppm/cm  
 HZCM 184.27042 Hz/cm

S85

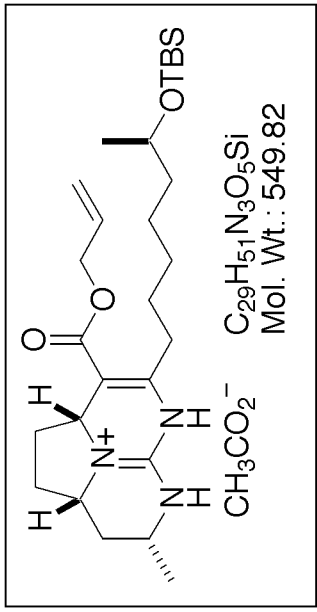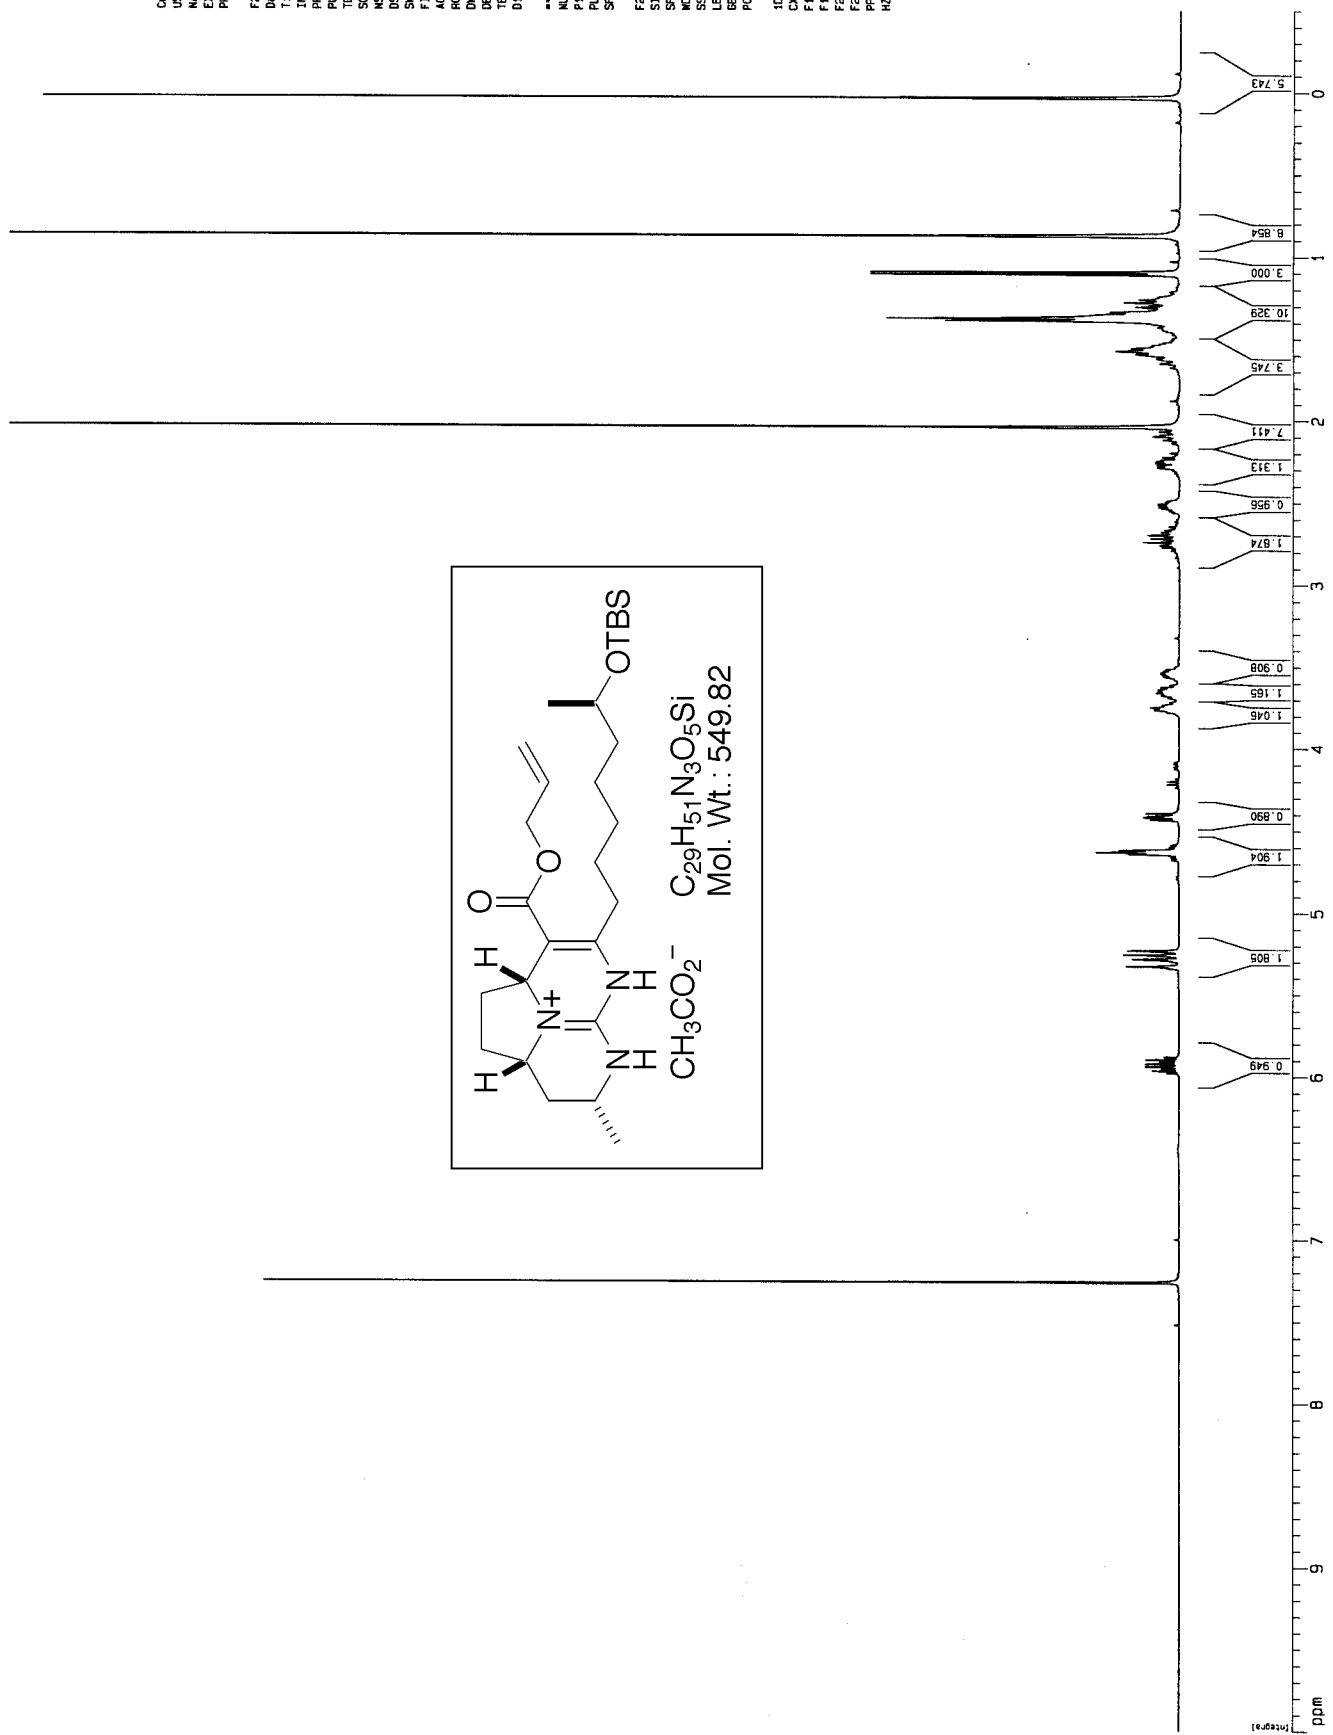



Current Data Parameters  
 USER lcohen  
 NAME fc-v-209  
 EXPNO 3  
 PROCNO 1

F2 - Acquisition Parameters  
 Date\_ 20001217  
 Time 14.51  
 INSTRUM dmwga500  
 PROBO 5 mm broadband  
 PULPROG zgpg30  
 TD 65536  
 SOLVENT CDCl3  
 NS 4740  
 DS 4

SWH 30303.031 Hz  
 FIDRES 0.465366 Hz  
 AQ 1.063845 sec  
 RG 728  
 DW 16.500 usec  
 DE 4.50 usec  
 TE 300.0 K  
 D1 0.25000000 sec  
 D11 0.03000000 sec

\*\*\*\*\* CHANNEL f1 \*\*\*\*\*  
 NUC1 13C  
 P1 7.00 usec  
 PL1 0.00 dB  
 SF01 125.764272 MHz

\*\*\*\*\* CHANNEL f2 \*\*\*\*\*  
 CPDPRG2 waltz16  
 NUC2 1H  
 P2 80.00 usec  
 PL2 120.00 dB  
 PL12 15.00 dB  
 SF02 400.2230013 MHz

F2 - Processing parameters  
 SI 65536  
 SF 125.764272 MHz  
 WFN 0  
 SSB 0  
 LB 1.00 Hz  
 GB 0  
 PC 1.00

1D NMR pilot parameters  
 CX 22.80 cm  
 F1P 190.000 ppm  
 F1 23898.28 Hz  
 F2P -10.000 ppm  
 F2 -1257.80 Hz  
 PPM0N 8.77193 ppm/cm  
 HZCM 1103.33716 Hz/cm

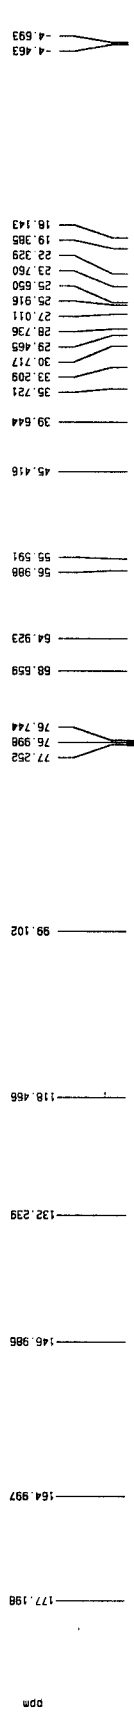

S86

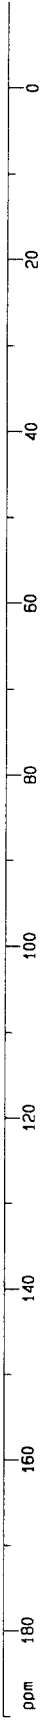

Current Data Parameters  
 USER fcohen  
 NAME f-c-v-267  
 EXPNO 1  
 PROCNO 1

F2 - Acquisition Parameters

Date\_ 20010523  
 Time 7.46  
 INSTRUM omegads00  
 PULPROG zgpg30  
 TO 65526  
 SOLVENT CDCl3  
 NS 24  
 DS 2  
 SWH 8012.820 Hz  
 FIDRES 0.122266 Hz  
 AQ 4.0894966 sec  
 RG 101.6  
 DM 62.400 usec  
 DE 6.00 usec  
 TE 300.0 K  
 D1 0.10000000 sec

\*\*\*\*\* CHANNEL f1 \*\*\*\*\*  
 NUC1 1H  
 P1 14.00 usec  
 PL1 0.00 dB  
 SFO1 500.2235015 MHz

F2 - Processing parameters

SF 500.2201931 MHz  
 SI 65536  
 GB 0  
 SB 0.30 Hz  
 AB 1  
 PC 1.00

S87

10. NMR plot parameters  
 CX 22.80 cm  
 FIP 10.000 ppm  
 F1 5002.20 Hz  
 F2 -250.11 Hz  
 PPHCM 0.46053 ppm/cm  
 HZCM 230.36450 Hz/cm

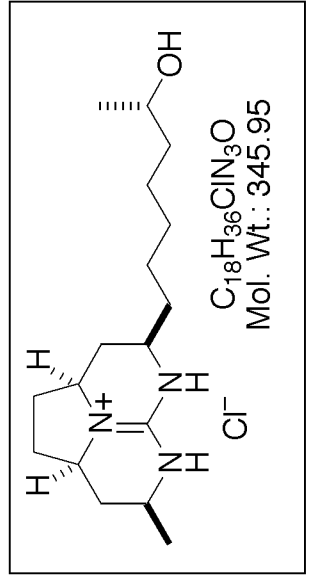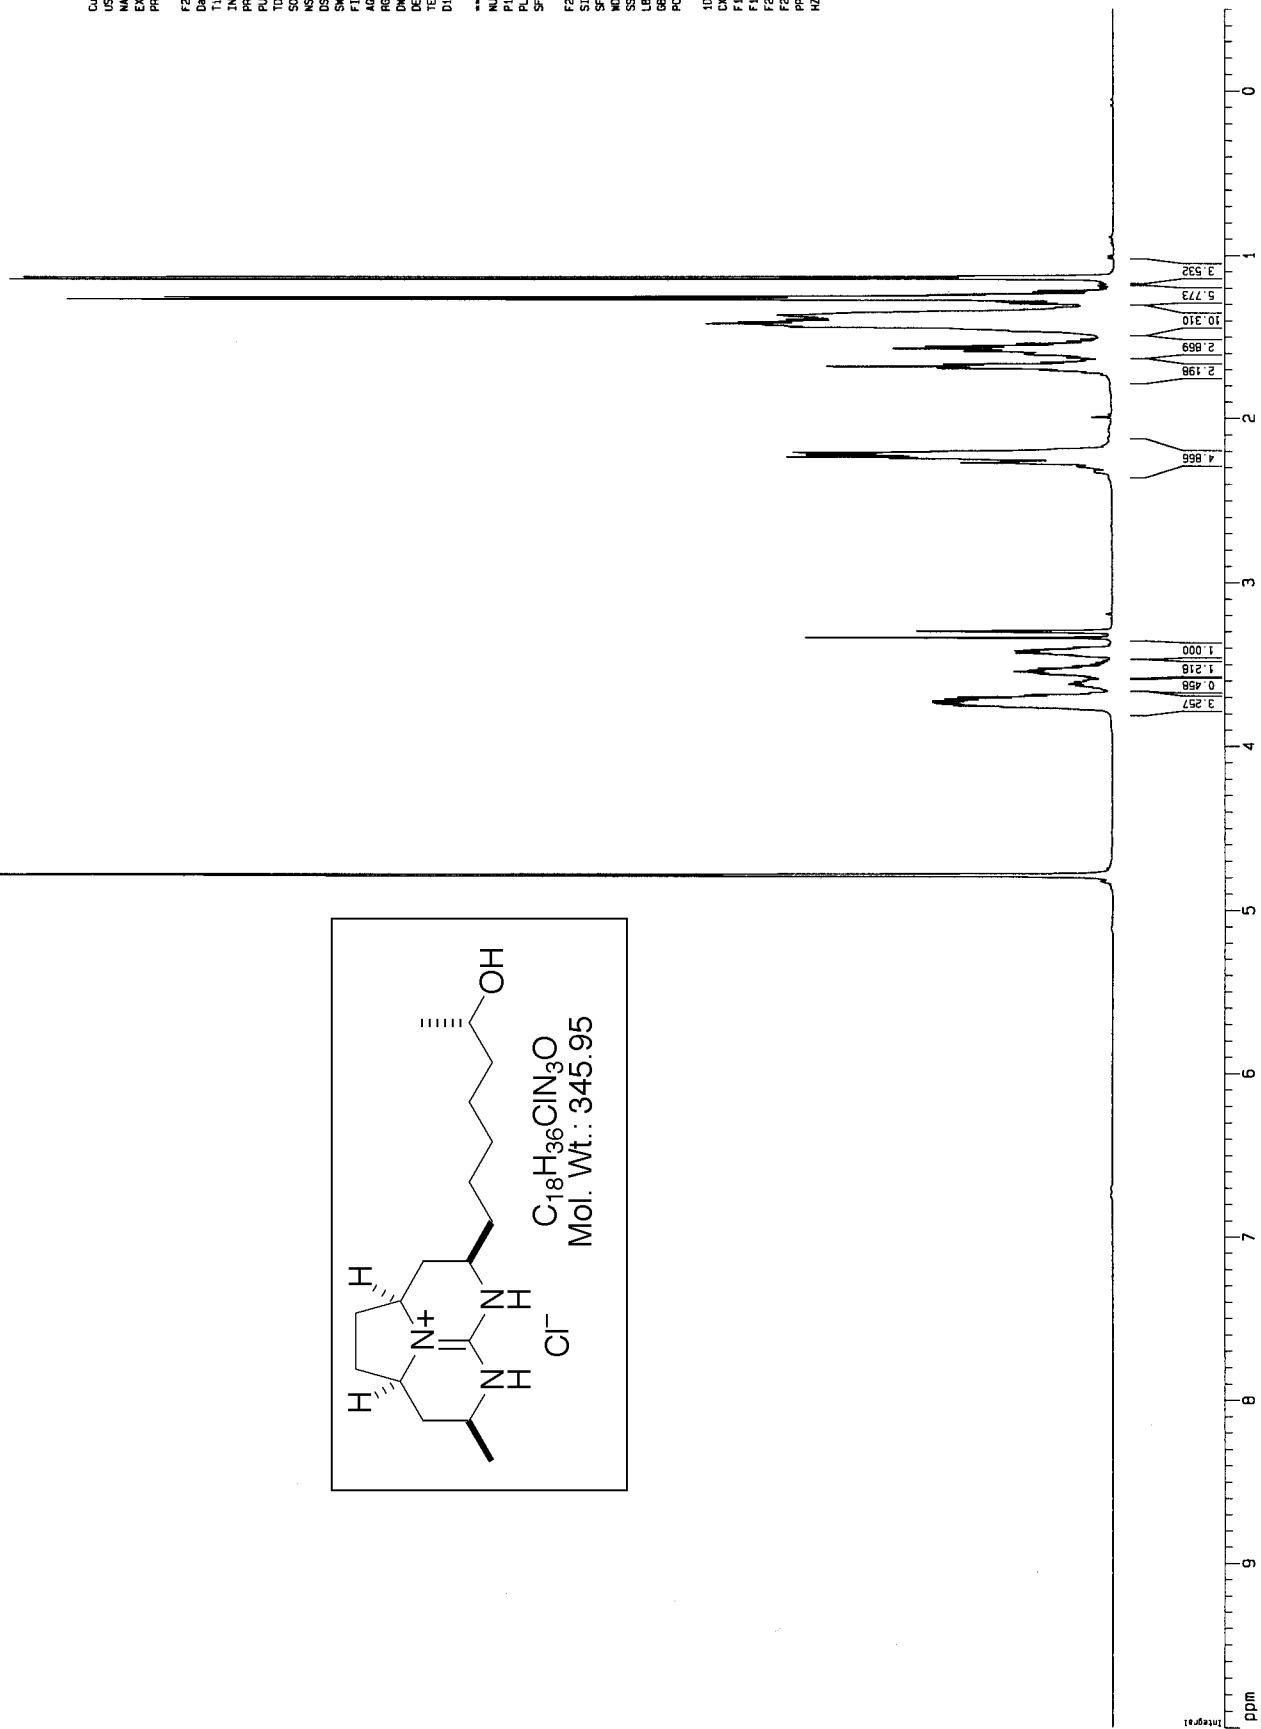

13C spectrum with 1H decoupling

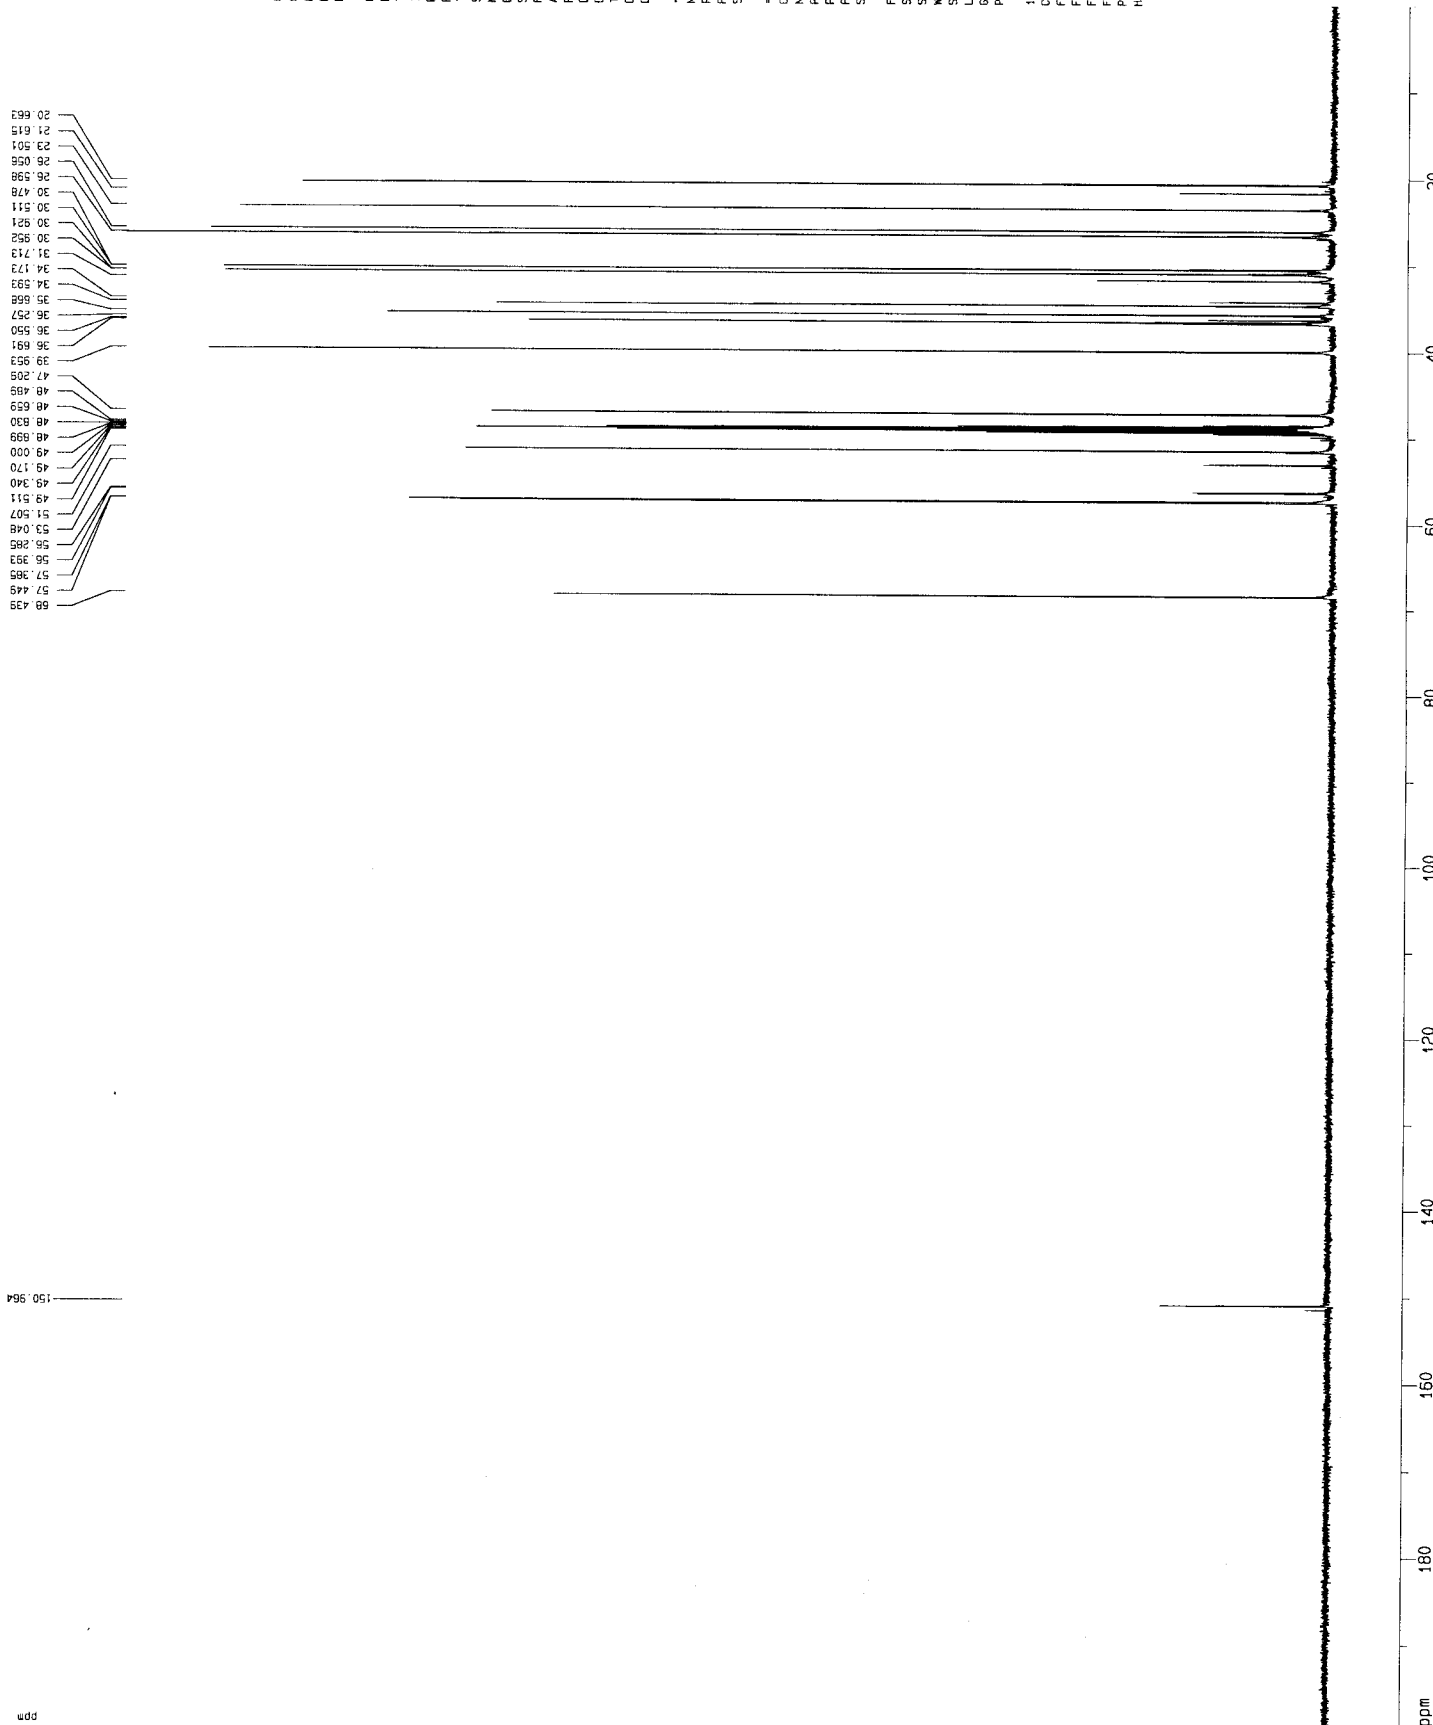

Current Data Parameters  
USER: fcm  
NAME: fc-Y-EB7  
EXPNO: 2  
PROCNO: 1

F2 - Acquisition Parameters  
Date\_: 20010323  
Time: 9.39  
INSTRUM: omega500  
PROBHD: 5 mm broadband  
PULPROG: zgpg30  
TD: 65536  
SOLVENT: CDCl3  
NS: 1616  
DS: 4  
SWH: 30303.031 Hz  
FIDRES: 0.462380 Hz  
AQ: 1.0613840 sec  
RG: 7288.2  
DB: 16.500 usec  
DE: 4.50 usec  
TE: 300.2 K  
O1: 0.75000000 sec  
O11: 0.63000000 sec

\*\*\*\*\* CHANNEL f1 \*\*\*\*\*  
NUC1: 13C  
P1: 9.00 usec  
PL1: -3.00 dB  
SFO1: 125.7642648 MHz

\*\*\*\*\* CHANNEL f2 \*\*\*\*\*  
CPDPRG2: waltz16  
NUC2: 1H  
P2: 80.00 usec  
PL2: 120.00 dB  
PL12: 17.00 dB  
SFO2: 22230013 MHz

F2 - Processing parameters  
SI: 65536  
SF: 125.7642648 MHz  
WDW: EM  
SSB: 0  
LB: 1.00 Hz  
GB: 0  
PC: 1.00

1D NMR plot parameters  
CX: 22.80 cs  
FIP: 200.000 ppm  
F1: 25156.05 Hz  
F2: 0.000 ppm  
PQCM: 8.77193 ppm/cm  
HZCM: 1103.33569 Hz/cm

S88

Current Date Parameters  
USER fcohen  
NAME 1c-v-1956  
EXPNO 1  
PROCNO 1

F2 - Acquisition Parameters

Date\_ 20001120  
Time 10.56  
INSTRUM gn500  
PROBHD 5 mm broadband  
PULPROG zg30  
TD 65536  
SOLVENT CD300  
NS 111  
DS 2  
SWH 6012.820 Hz  
FIDRES 0.122266 Hz  
AQ 4.0894966 sec  
RG 512  
DW 62.400 usec  
DE 6.00 usec  
TE 300.0 K  
D1 0.1000000 sec

\*\*\*\*\* CHANNEL f1 \*\*\*\*\*

NUC1 1H  
P1 12.00 usec  
PL1 -3.00 dB  
SF01 500.1335009 MHz

F2 - Processing parameters

SI 32768  
SF 500.1300209 MHz  
WDW EM  
SSB 0  
LB 0.30 Hz  
GB 0  
PC 4.00

1D NMR plot parameters

CX 14.75 cm  
FIP 10.000 ppm  
F1 5001.30 Hz  
F2P -0.500 ppm  
F2 250.07 Hz  
PPMCM 0.71186 ppm/cm  
VIZCM 356.02478 Hz/cm

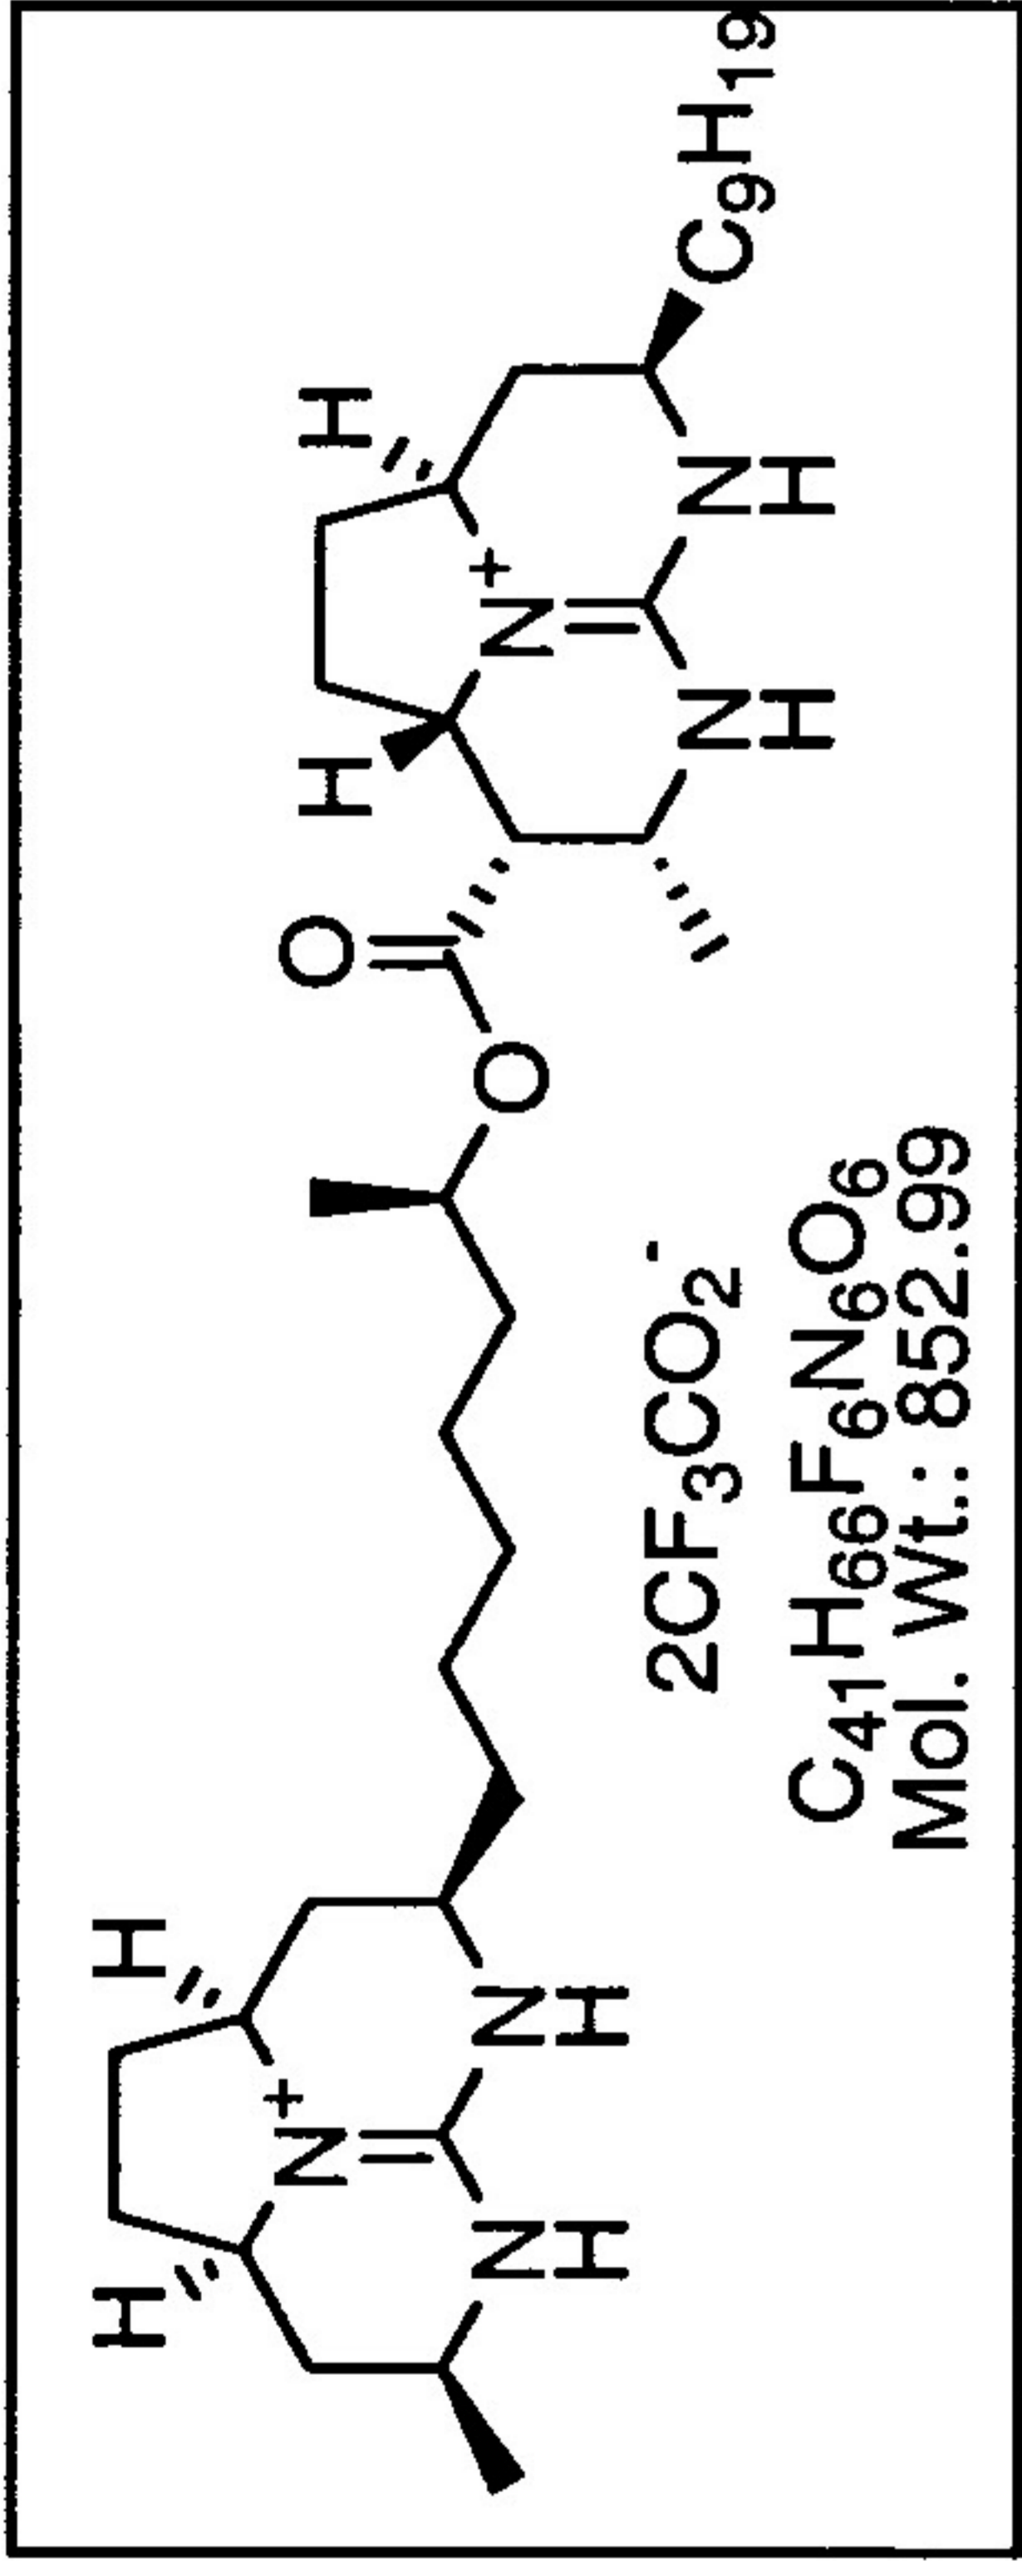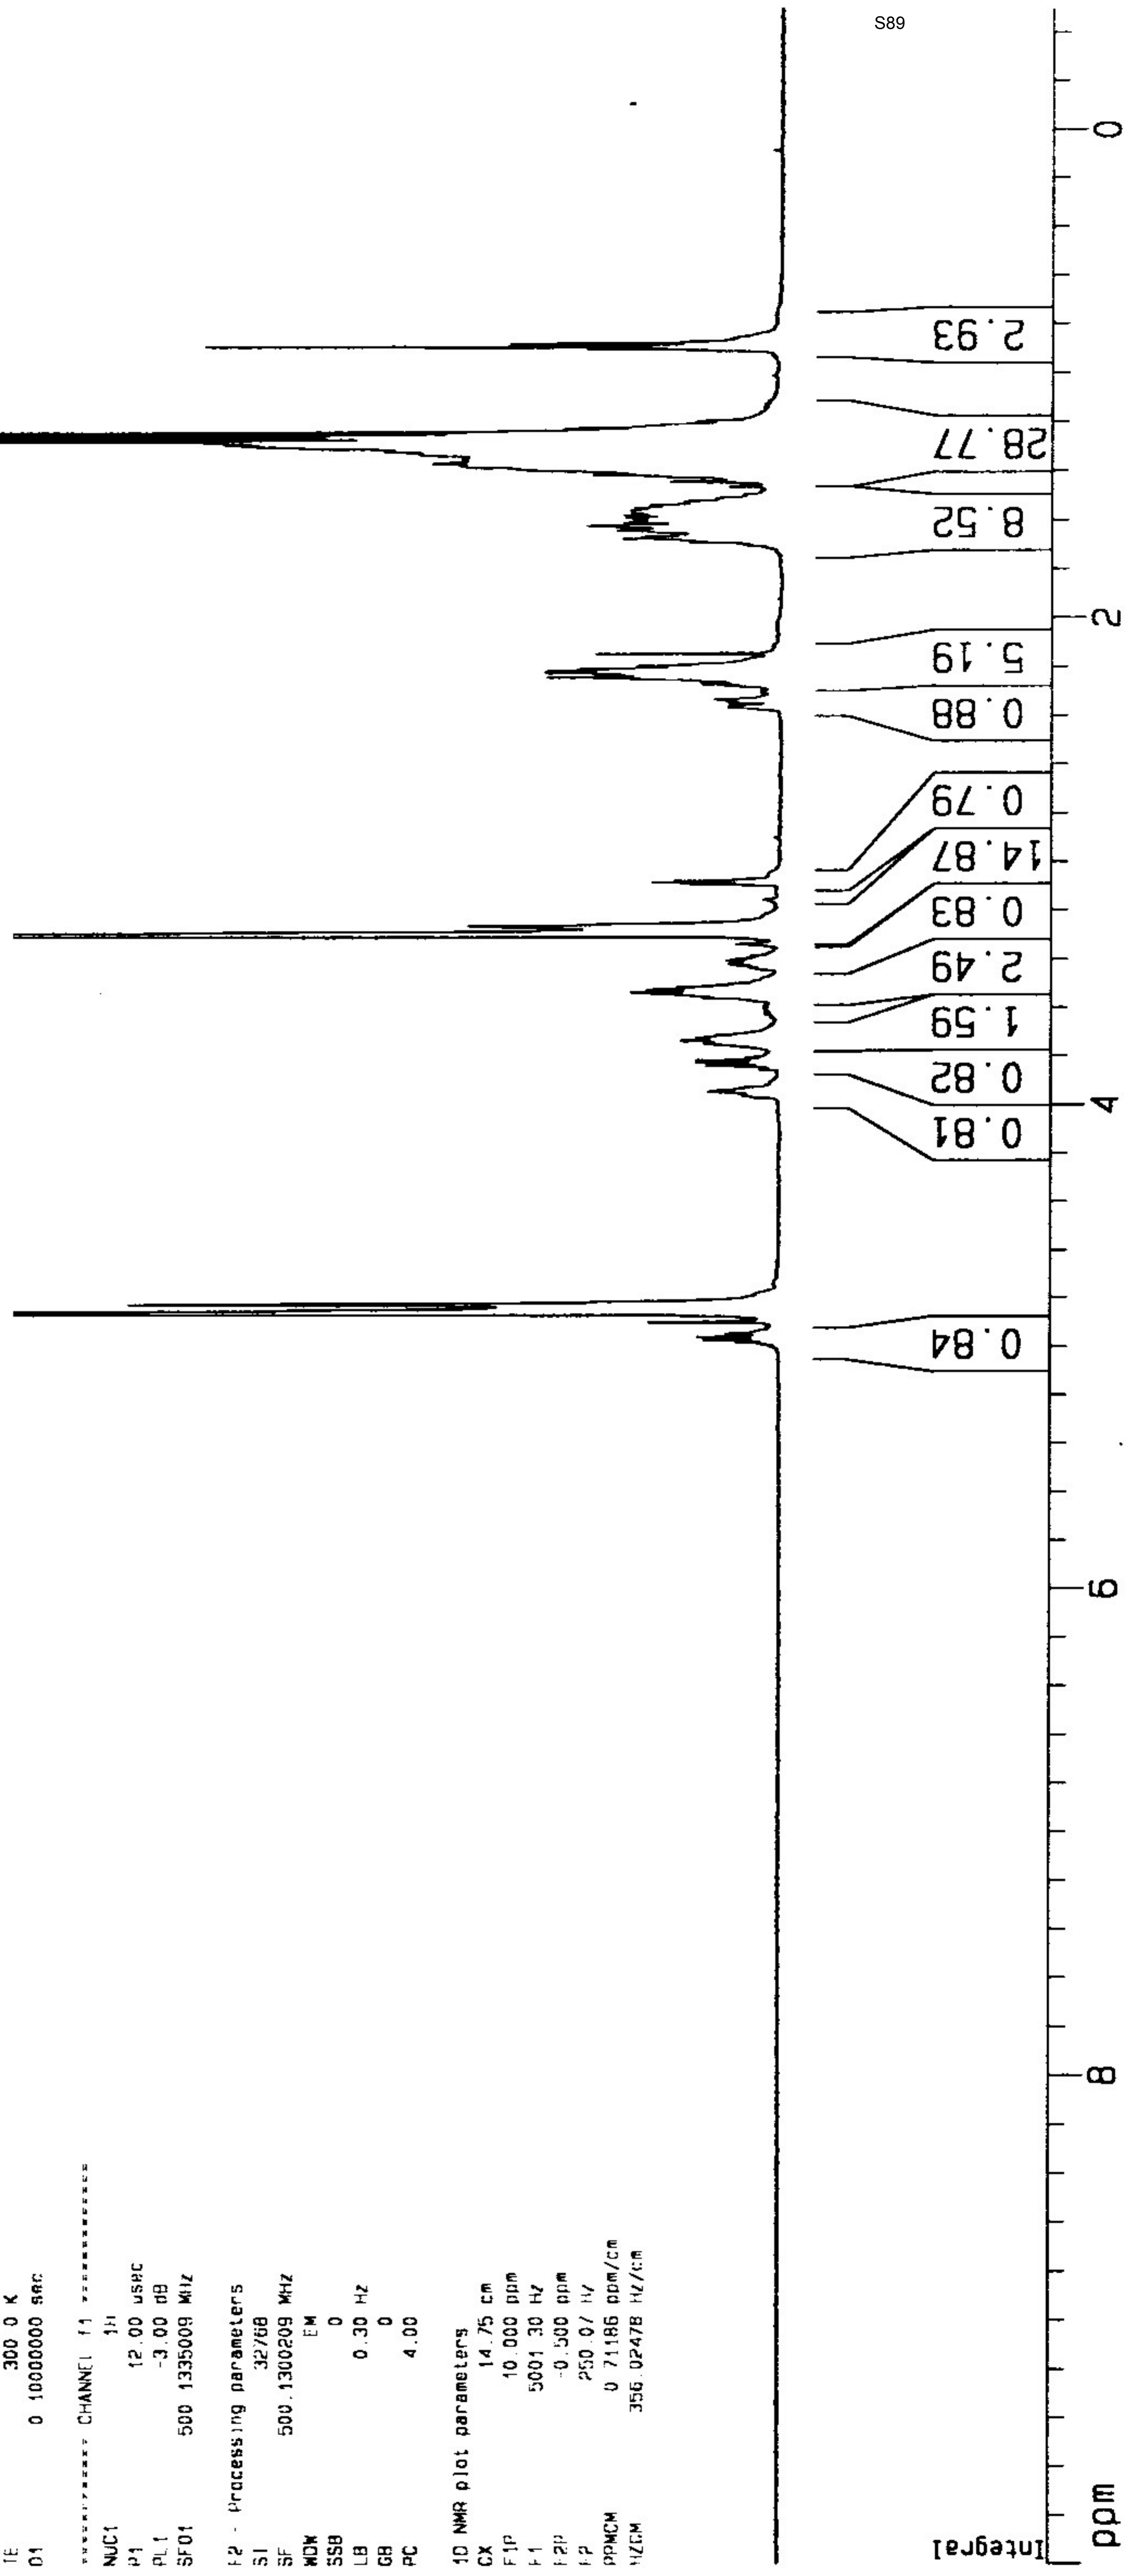

Current Data Parameters

USER fcohin  
NAME fc-v-1956  
EXPNO 2  
PROCNO 1

F2 Acquisition Parameters

Date 20001121  
Time 6.56  
INSTRUM gn500  
PROBHD 5 mm broadband  
PULPROG zgpg30  
TD 65536  
SOLVENT CD3OD  
NS 23508  
DS 2  
SWH 30185.178 Hz  
FIDRES 0.460589 Hz  
AQ 1.0856159 sec  
RG 9195 2  
DM 16.564 usec  
DE 4.50 usec  
TE 300.0 K  
D1 0.25000000 sec  
D11 0.03000000 sec

CHANNEL F1  
NUC1 13C  
P1 6.25 usec  
PL1 0.00 dB  
SFO1 125.7715724 MHz

CHANNEL F2  
CPDPRG2 waltz16  
NUC2 1H  
PCPD2 80.00 usec  
PL2 -3.00 dB  
PL12 13.50 dB  
SFO2 500.1340000 MHz

F2 Processing parameters

SI 65536  
SF 125.7576433 MHz  
WDW EM  
SSB 0  
LB 1.00 Hz  
GB 0  
PC 1.00

1D NMR plot parameters

CX 14.75 cm  
F1P 200.000 ppm  
F1 25151.53 Hz  
F2P 0.000 ppm  
F2 0.00 Hz  
PPMCM 13.55932 ppm/cm  
HZCM 1705.18848 Hz/cm

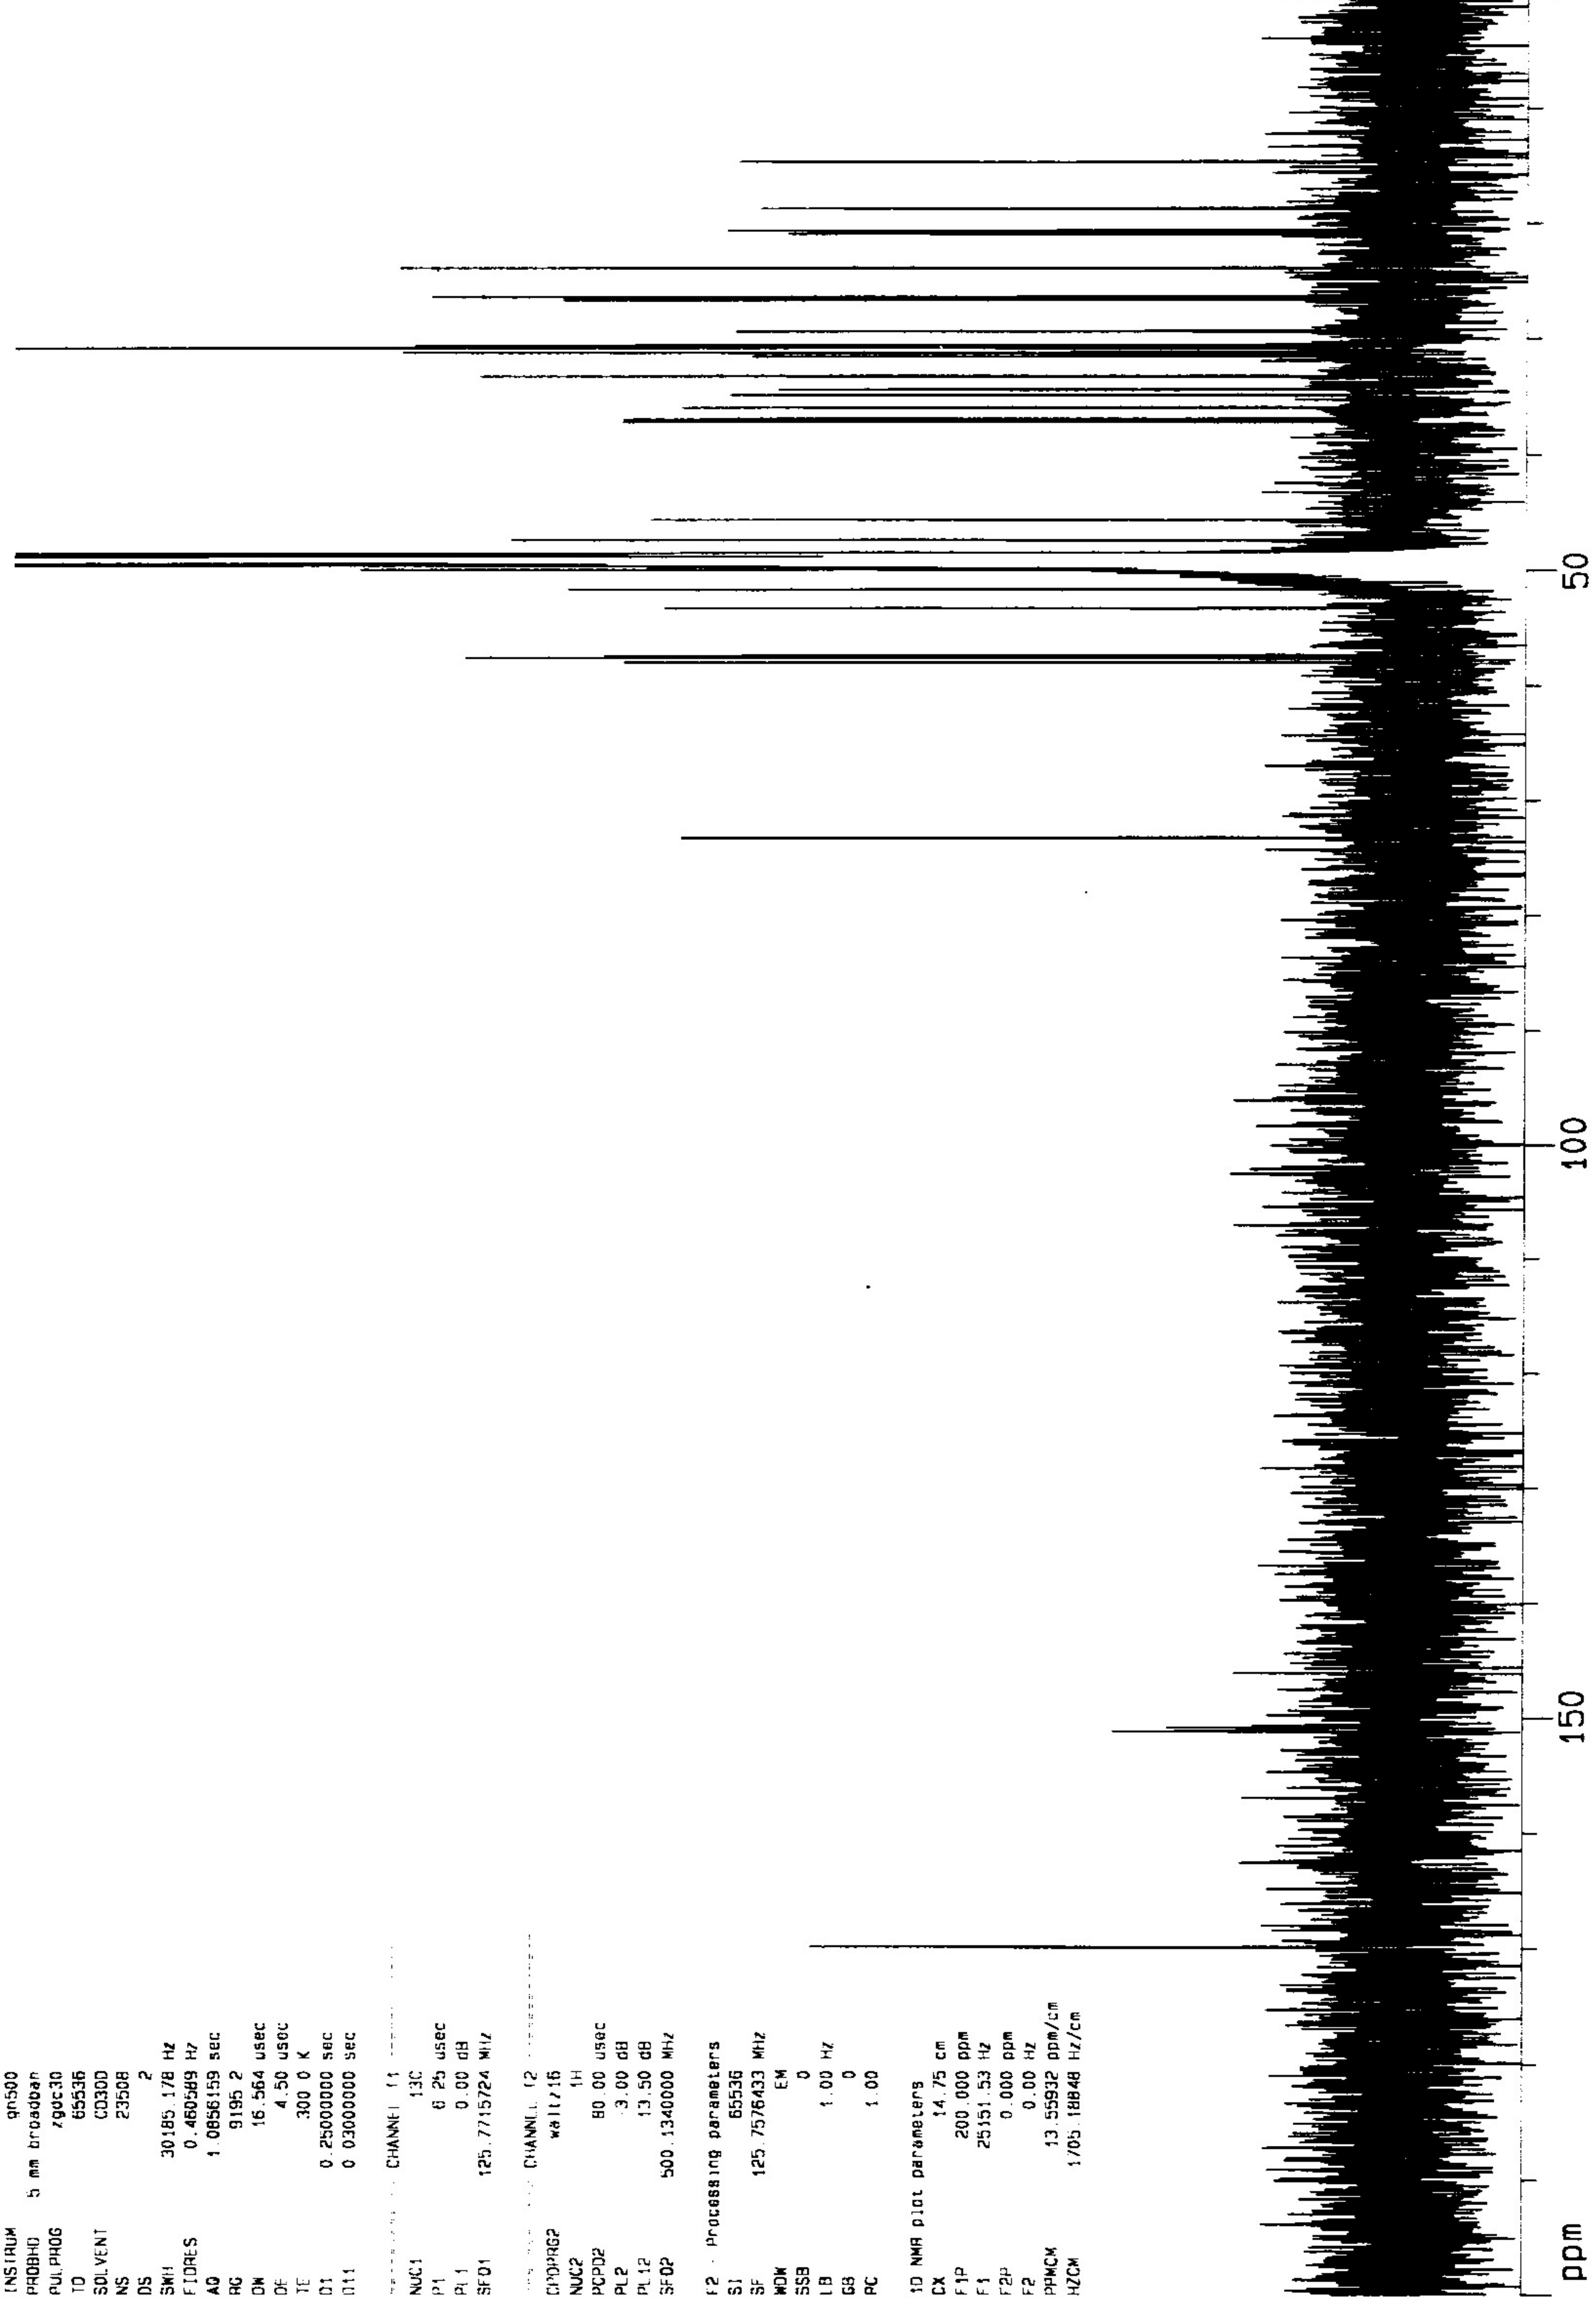

Current Data Parameters  
 NAME fc-1v-146  
 EXPNO 1  
 PROCNO 1

F2 - Acquisition Parameters

Date\_ 991016  
 Time 19.11  
 INSTRUM spect  
 PROBHC 5 mm broadband  
 PULPROG zg  
 TD 32768  
 SOLVENT CDCl3  
 NS 16  
 DS 2  
 SWH 6009.815 Hz  
 FIDRES 0.183399 Hz  
 AQ 2.7283477 sec  
 RG 128  
 DW 83.200 usec  
 DE 6.00 usec  
 TE 300.0 K  
 D1 1.00000000 sec

\*\*\*\*\* CHANNEL f1 \*\*\*\*\*

NUC1 1H  
 P1 4.00 usec  
 PL1 0.00 dB  
 SFO1 499.8924895 MHz

F2 - Processing parameters

SI 32768  
 SF 499.8990165 MHz  
 MDW EM  
 SSB 0  
 LB 0.30 Hz  
 GB 0  
 PC 1.00

1D NMR plot parameters

CX 28.12 cm  
 F1P 10.000 ppm  
 F1 4998.90 Hz  
 F2P -0.500 ppm  
 F2 -249.95 Hz  
 PPMCM 0.37333 ppm/cm  
 HZCM 186.82561 Hz/cm

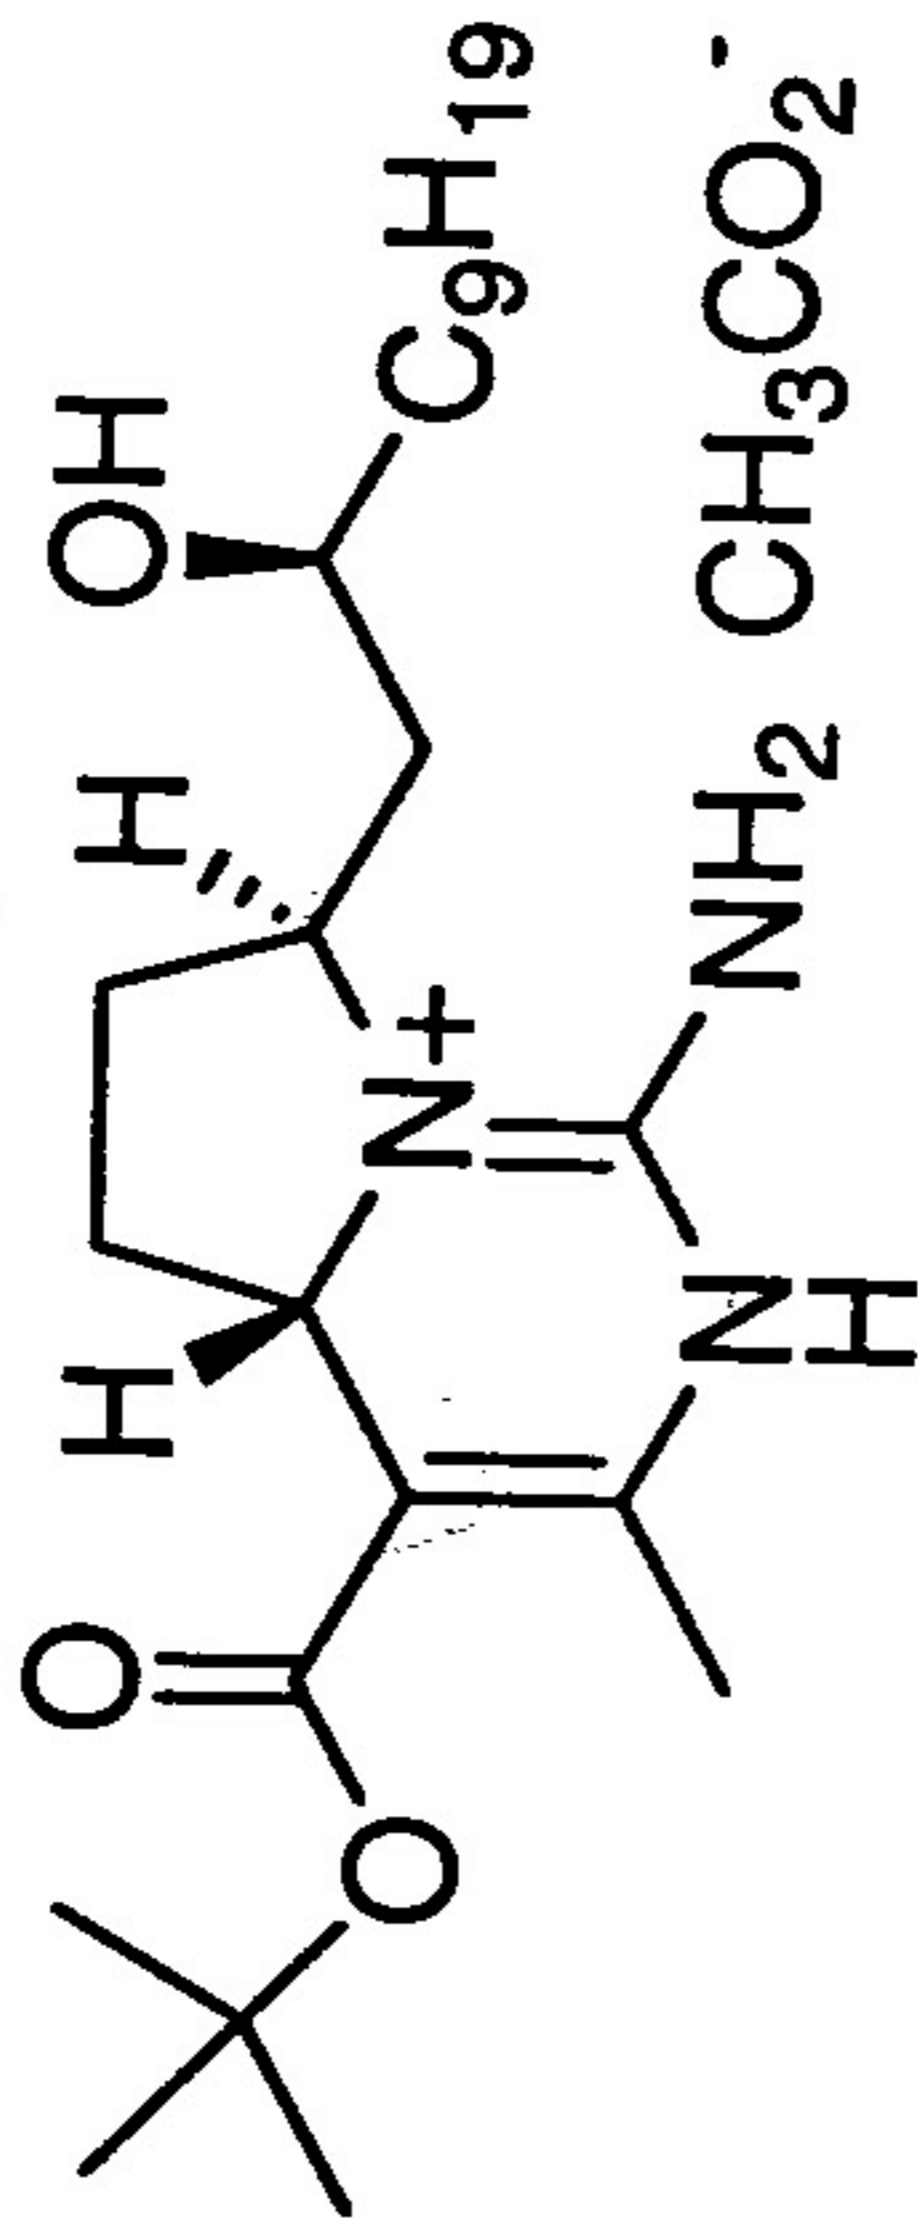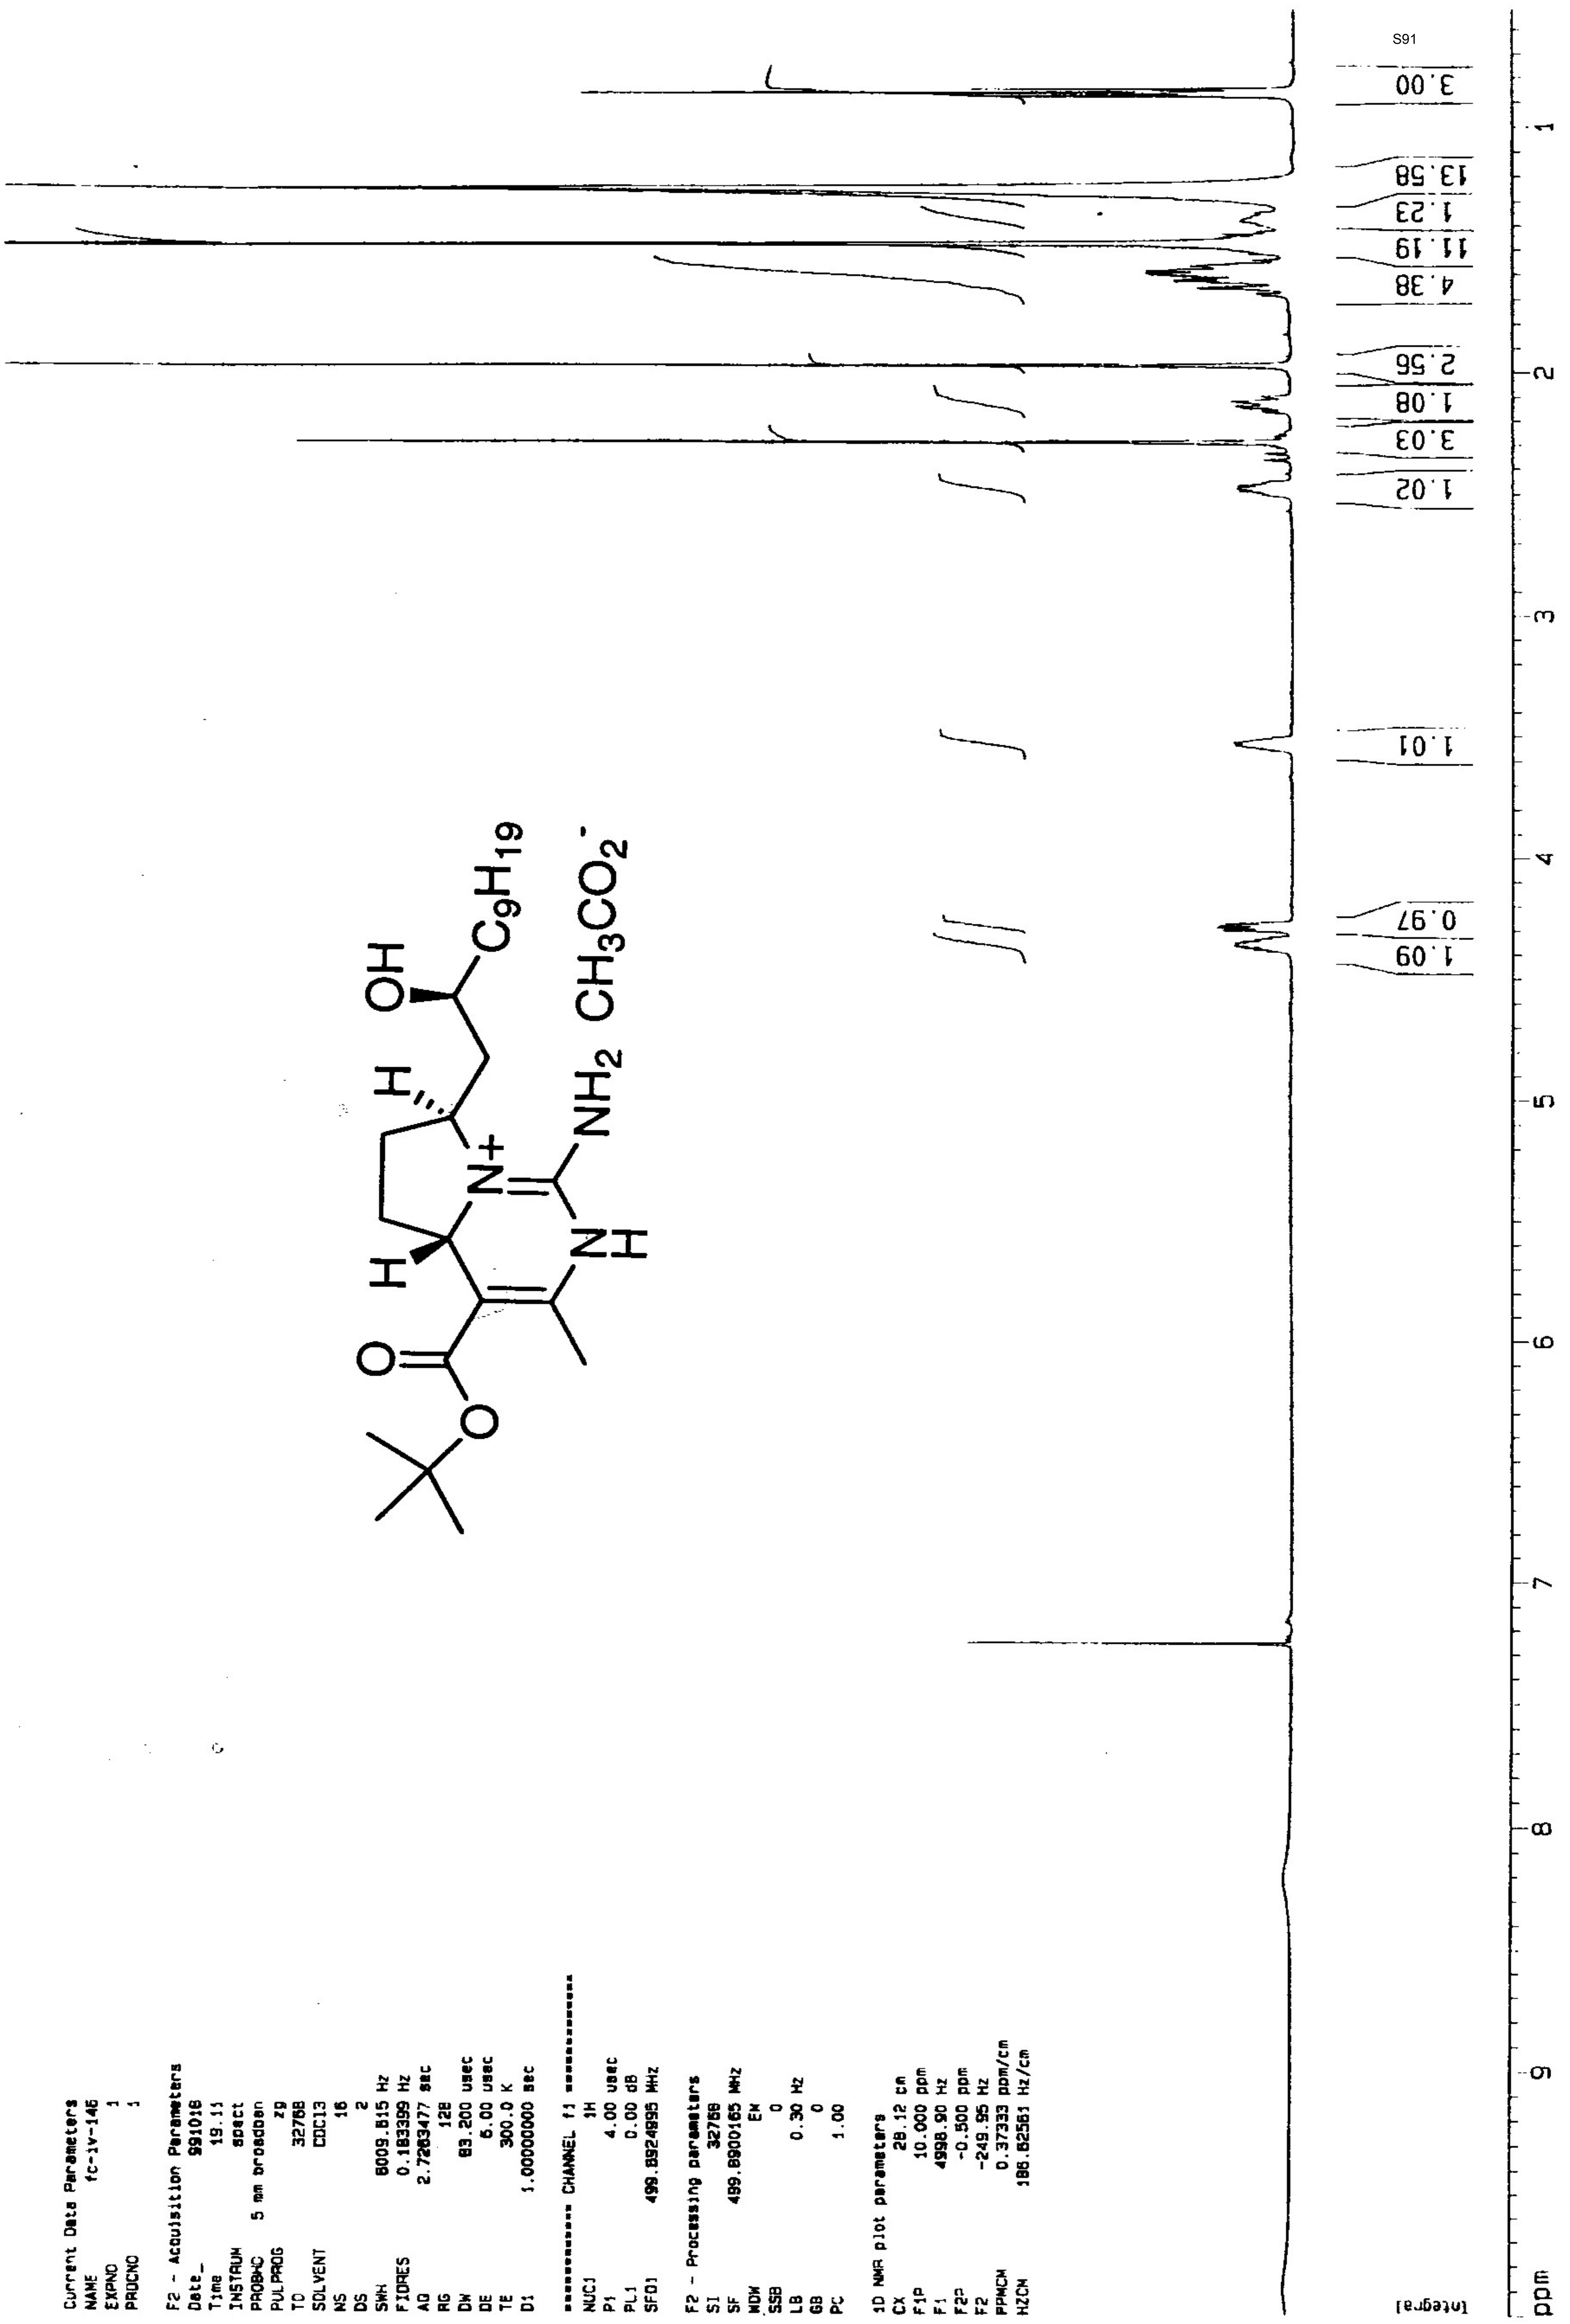

Current Data Parameters  
 NAME fc-iv-100  
 EXPNO 1  
 PROCNO 1

F2 - Acquisition Parameters  
 Date\_ 991018  
 Time 19.24  
 INSTRUM spect  
 PROBHD 5 mm broadband  
 PULPROG zgdc  
 TD 32768  
 SOLVENT C6D6  
 NS 512  
 DS 0  
 SMH 31446.541 Hz  
 FIDRES 0.959672 Hz  
 AQ 0.5210612 sec  
 RG 2896.3  
 DW 15.900 usec  
 DE 4.50 usec  
 TE 300.0 K  
 D1 2.0000000 sec  
 D11 0.0300000 sec

CHANNEL f1  
 NUC1 13C  
 P1 3.00 usec  
 PL1 0.00 dB  
 SFO1 125.7105882 MHz

CHANNEL f2  
 CPOPRG2 waltz16  
 NUC2 1H  
 PCPD2 79.50 usec  
 PL2 120.00 dB  
 PL12 15.00 dB  
 SFO2 499.8924995 MHz

F2 - Processing parameters  
 SI 16384  
 SF 125.6974451 MHz  
 WDW EM  
 SSB 0  
 LB 1.00 Hz  
 GB 0  
 PC 1.00

1D NMR plot parameters  
 CX 25.00 cm  
 F1P 200.000 ppm  
 F1 25139.48 Hz  
 F2P 0.000 ppm  
 F2 0.00 Hz  
 PRGCM 8.00000 ppm/50

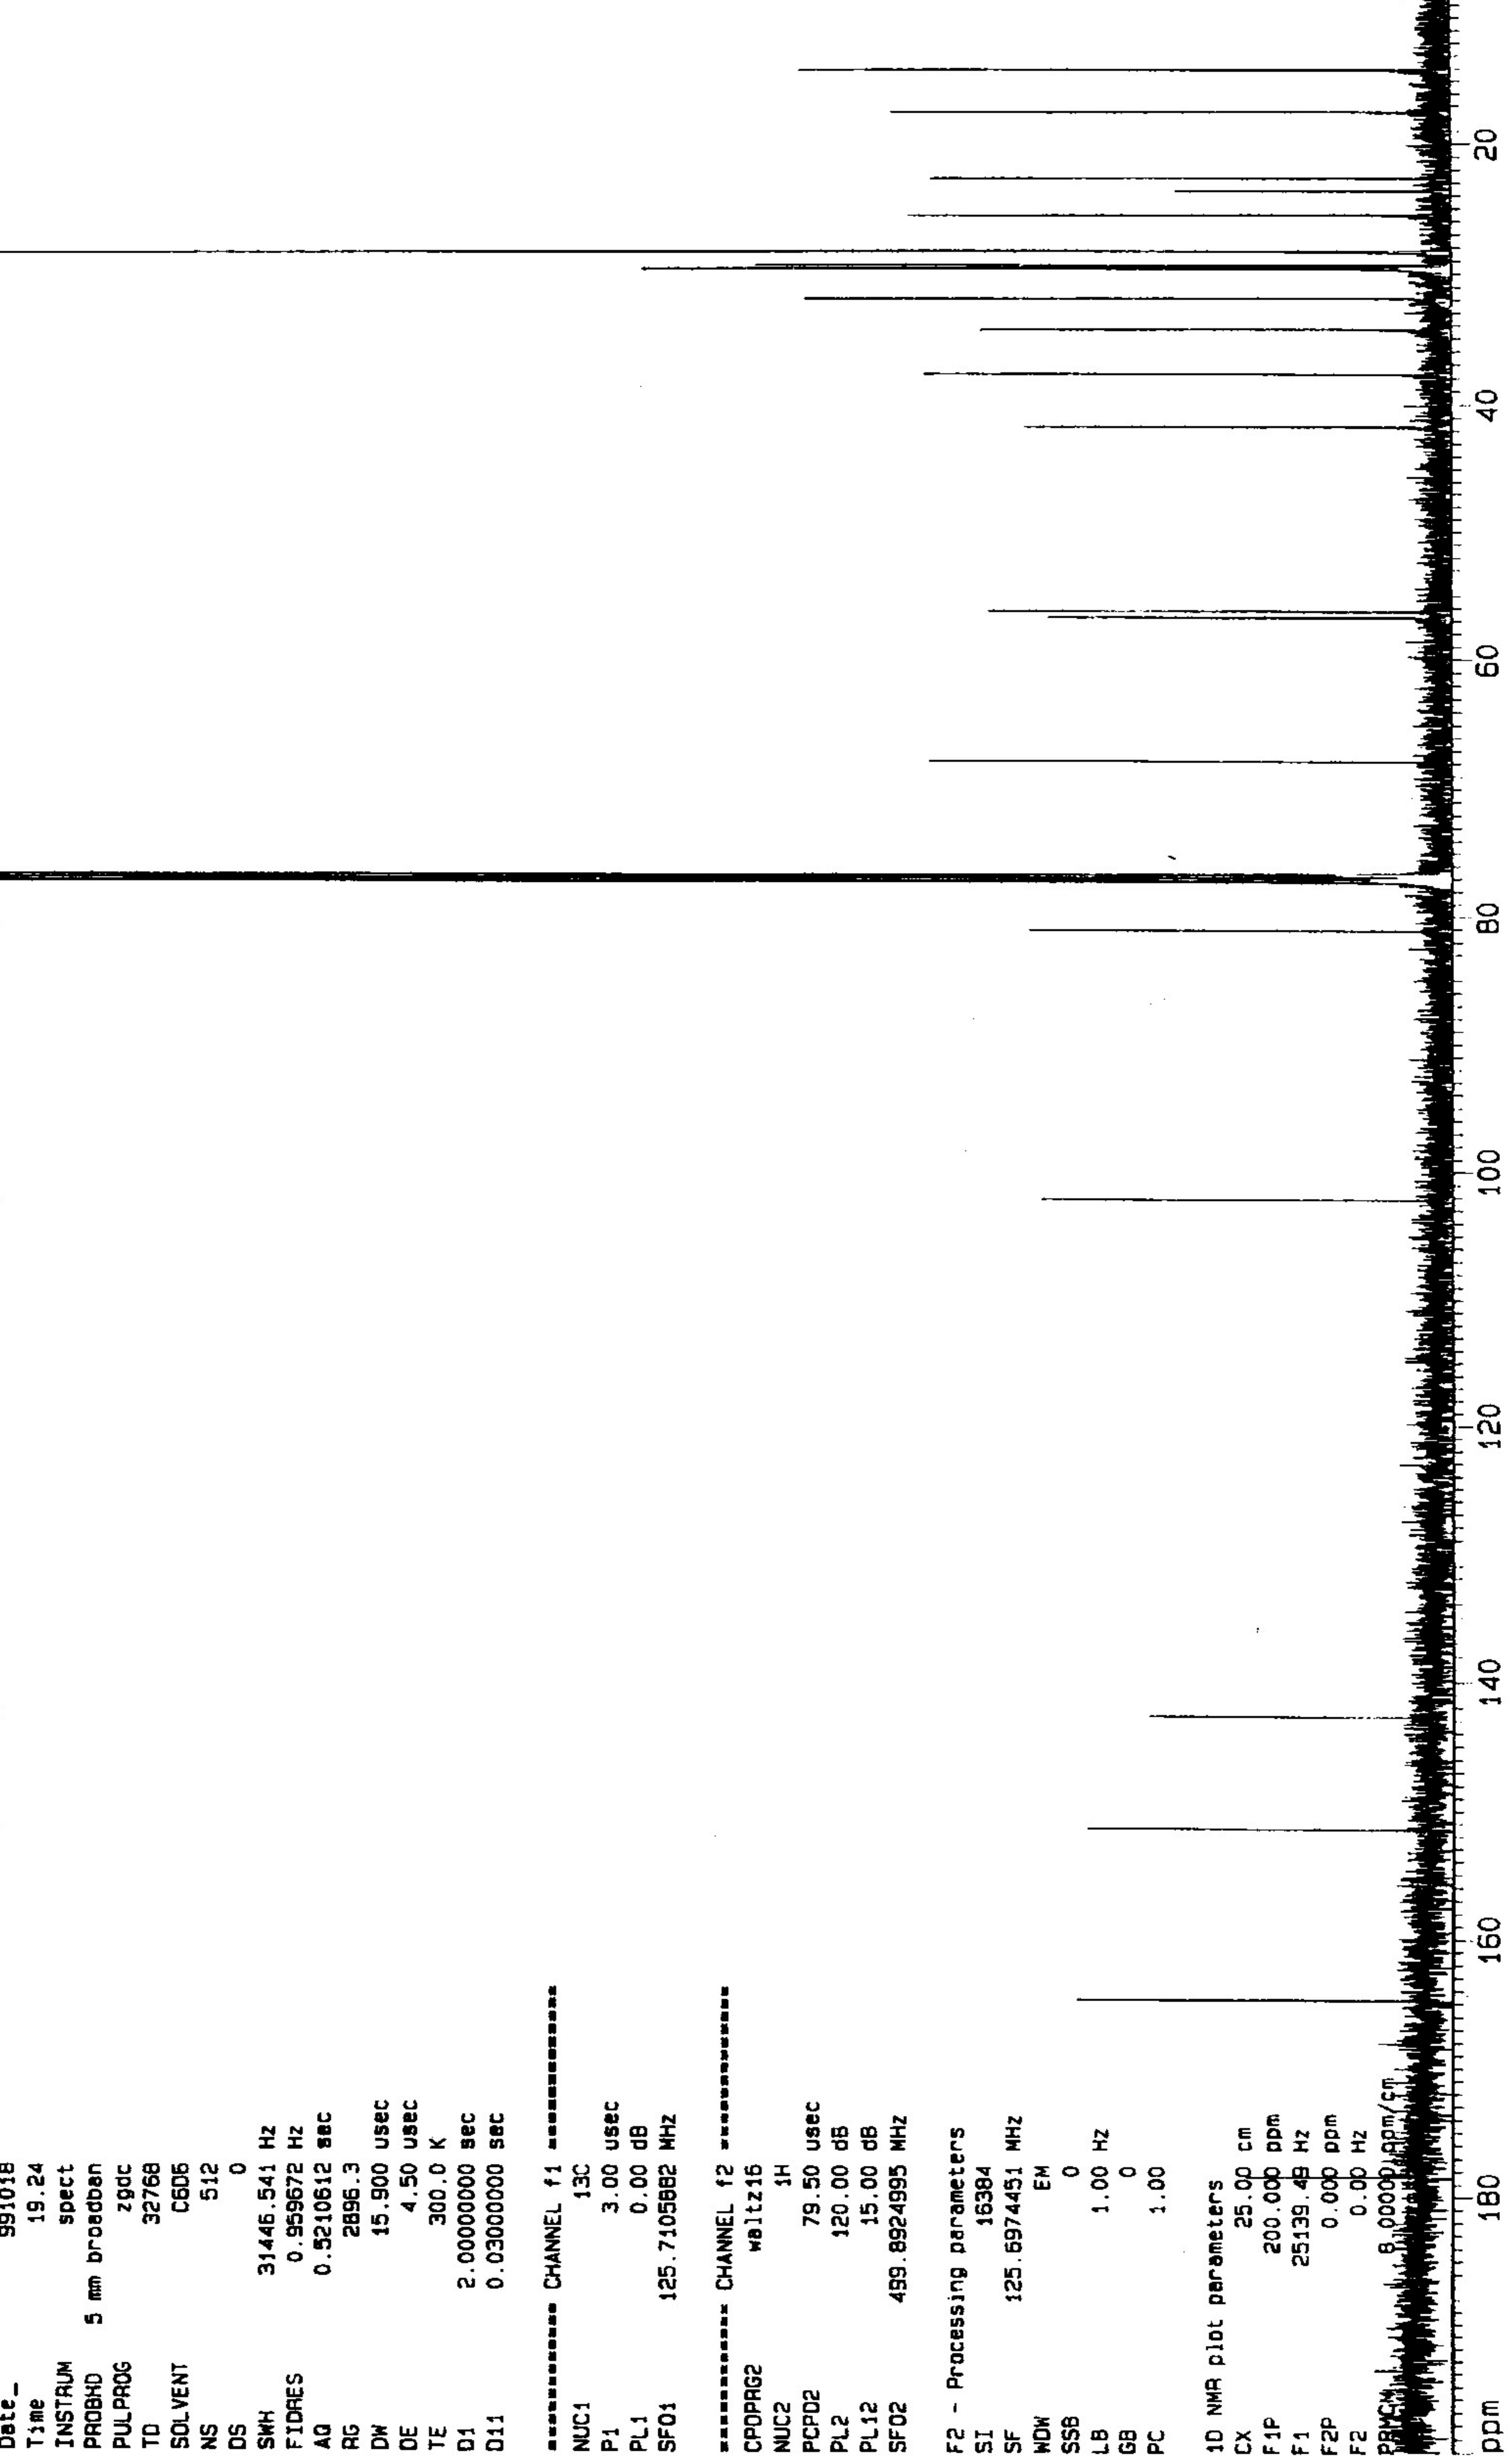

Current Data Parameters  
 NAME fc-1v-144  
 EXPNO 2  
 PROCNO 1

F2 - Acquisition Parameters

Date\_ 991018  
 Time 11.58  
 INSTRUM spect  
 PROBRD 5 mm broadban  
 PULPROG zg  
 TD 32768  
 SOLVENT CDCl3  
 NS 15  
 DS 2  
 SWH 6009.615 Hz  
 FIDRES 0.183399 Hz  
 AQ 2.7263477 sec  
 RG 203.2  
 DM 83.200 usec  
 DE 6.00 usec  
 TE 300.0 K  
 D1 1.00000000 sec

\*\*\*\*\* CHANNEL f1 \*\*\*\*\*

NUC1 1H  
 P1 4.00 usec  
 PL1 0.00 dB  
 SFO1 499.8924895 MHz

F2 - Processing parameters

SI 32768  
 SF 499.890165 MHz  
 WDW EM  
 SSB 0  
 LB 0.30 Hz  
 BB 0  
 PC 1.00

1D NMR plot parameters

CX 28.12 cm  
 FJP 10.000 ppm  
 F1 4998.90 Hz  
 F2P -0.500 ppm  
 F2 -249.95 Hz

HZCM 186.62561 hz/cm

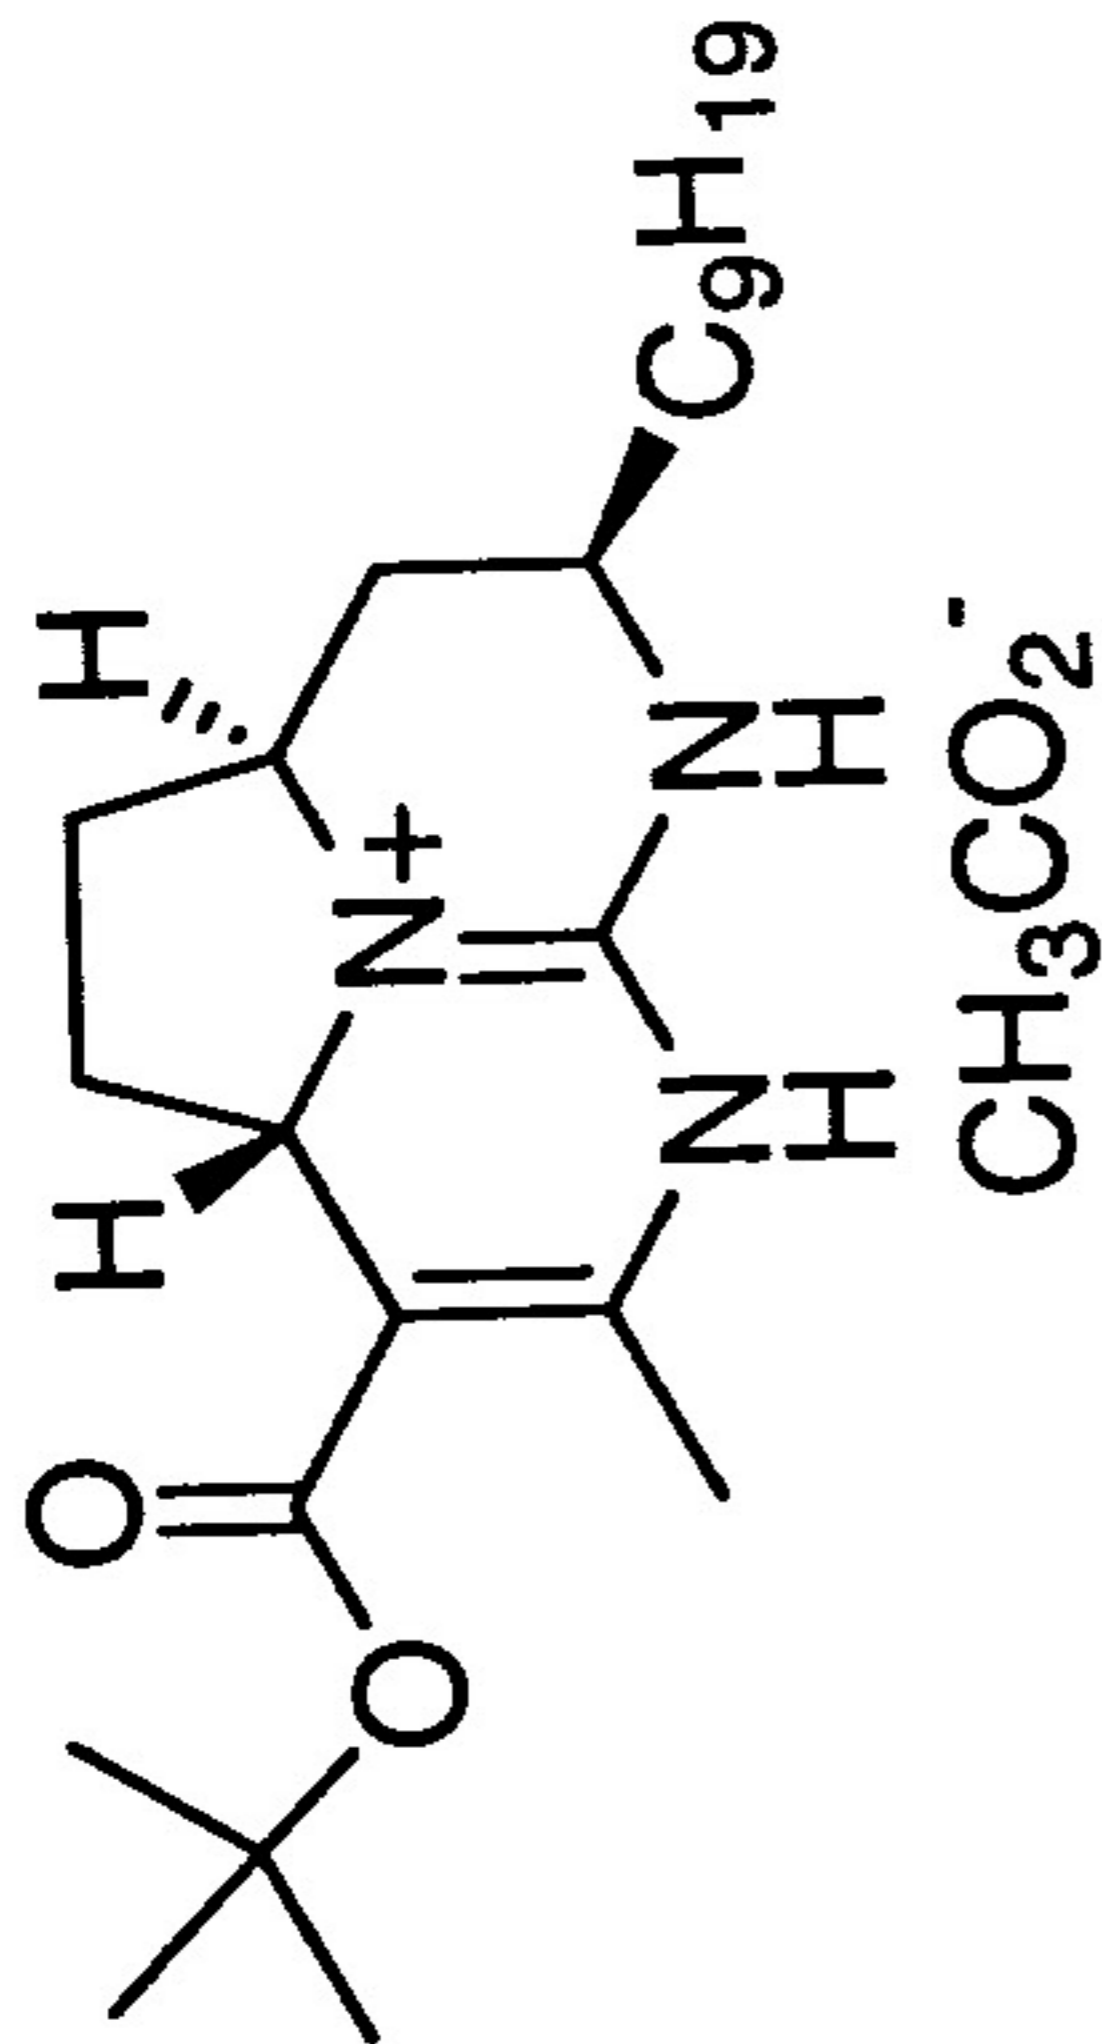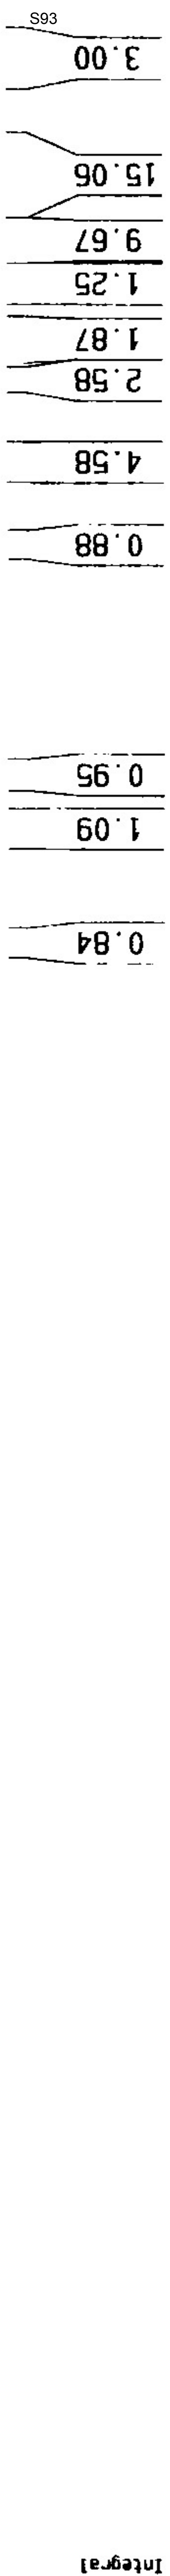

Integral

ppm



Current Data Parameters  
 NAME fc-iv-074  
 EXPNO 3  
 PROCNO 1

F2 - Acquisition Parameters

Date\_ 991018  
 Time 12.09  
 INSTRUM spect  
 PROBHD 5 mm broadband  
 PULPROG zgdc  
 TD 32768  
 SOLVENT C6D6  
 NS 512  
 DS 0  
 SWH 31446.541 Hz  
 FIDRES 0.959672 Hz  
 AQ 0.5210612 sec  
 RG 4096  
 DW 15.900 usec  
 DE 4.50 usec  
 TE 300.0 K  
 D1 2.0000000 sec  
 D11 0.0300000 sec

CHANNEL f1

NUC1 13C  
 P1 3.00 usec  
 PL1 0.00 dB  
 SF01 125.710582 MHz

CHANNEL f2

CPDPRG2 waltz16  
 NUC2 1H  
 PCPD2 79.50 usec  
 PL2 120.00 dB  
 PL12 15.00 dB  
 SF02 499.8924995 MHz

F2 - Processing parameters

SI 16384  
 SF 125.697470 MHz  
 WDM EM  
 SSB 0  
 LB 1.00 Hz  
 GB 0  
 PC 1 00

3D NMR plot parameters

CX 25 00 cm  
 F1P 200.000 ppm  
 F1 25139.49 Hz  
 F2P 0.000 ppm  
 F2 0 00 Hz

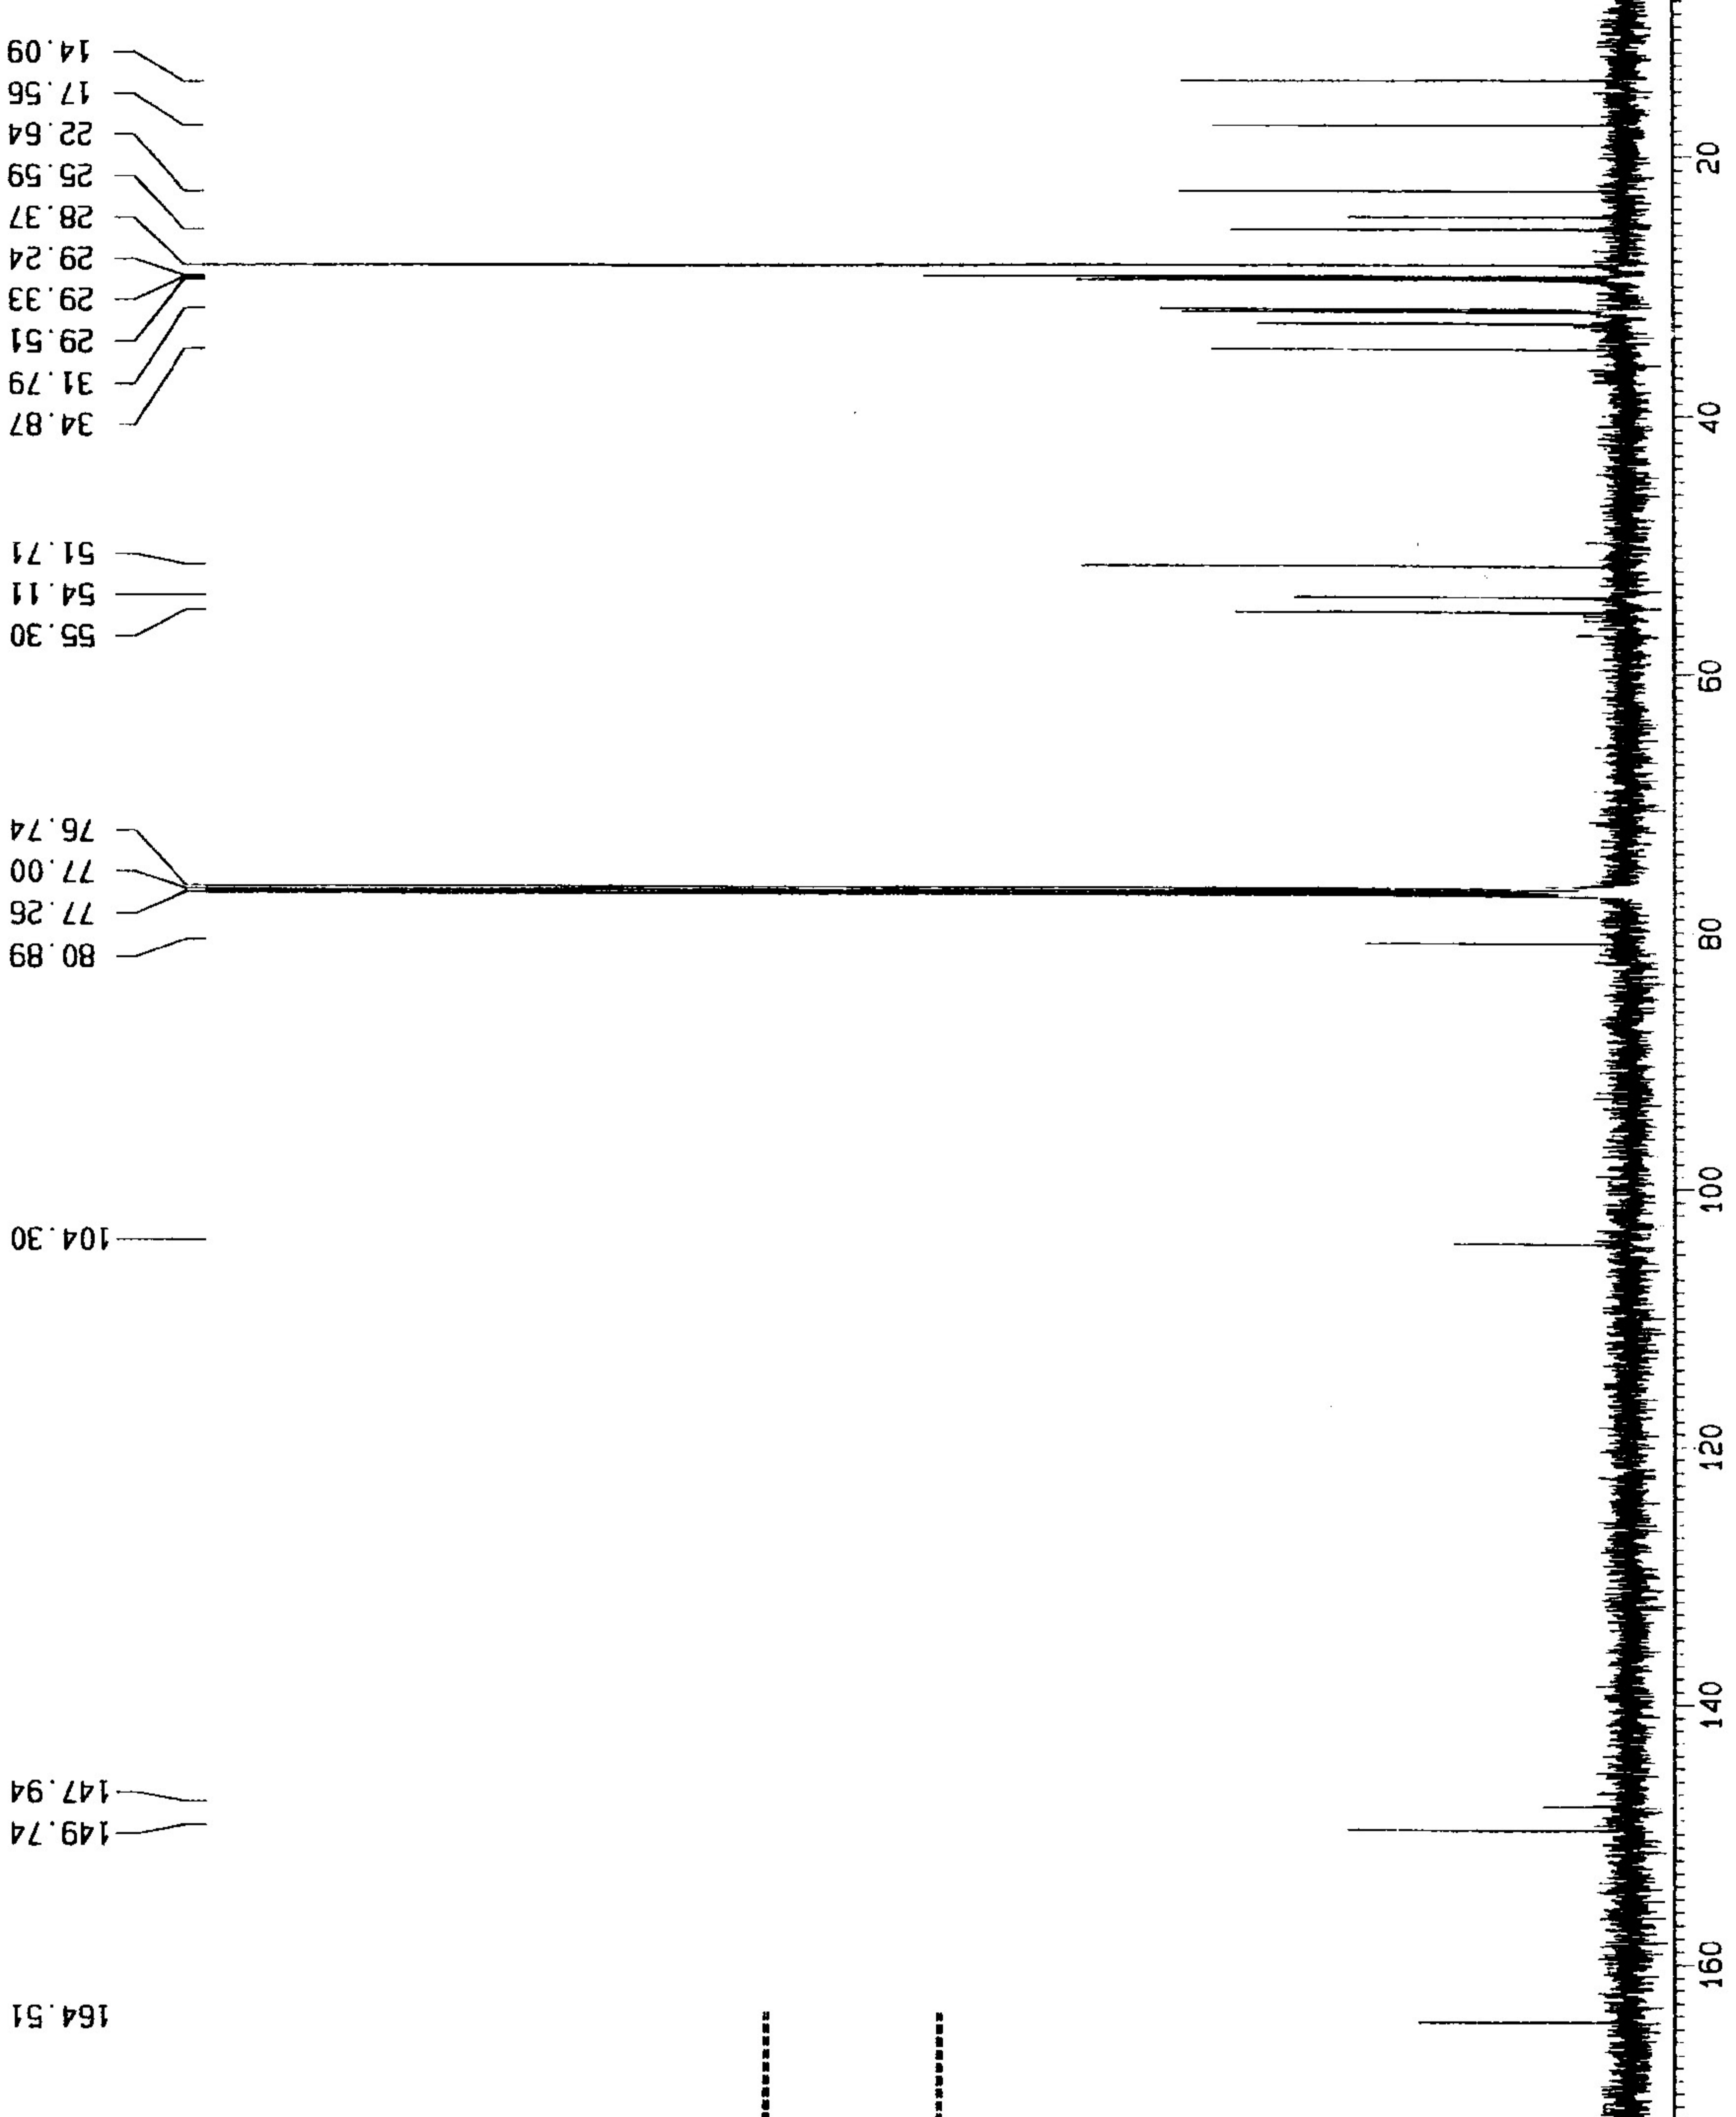

Current Data Parameters  
 NAME fc-3v-268a  
 EXPNO 1  
 PROCNO 1

F2 - Acquisition Parameters

Date\_ 20000417  
 Time 15.07  
 INSTRUM spect  
 PROBHD 5 mm broadband  
 PULPROG zg  
 TD 32768  
 SOLVENT CDCl3  
 NS 16  
 DS 2  
 SWH 6009.615 Hz  
 FIDRES 0.183389 Hz  
 AQ 2.7263477 sec  
 RG 322.5  
 DM 83.200 usec  
 DE 6.00 usec  
 TE 300.0 K  
 D1 1.00000000 sec

----- CHANNEL f1 -----

NUC1 1H  
 P1 4.00 usec  
 PL1 0.00 dB  
 SFO1 499.8924995 MHz

F2 - Processing parameters

SI 32768  
 SF 499.8900192 MHz  
 WDW EM  
 SSB 0  
 LB 0.30 Hz  
 GB 0  
 PC 1.00

1D NMR plot parameters

CX 25.00 cm  
 F1P 10.000 ppb  
 F1 4988.80 Hz  
 F2P -0.500 ppb  
 F2 -248.95 Hz  
 PPMCK 0.42000 ppm/cm  
 HZCM 209.95381 Hz/cm

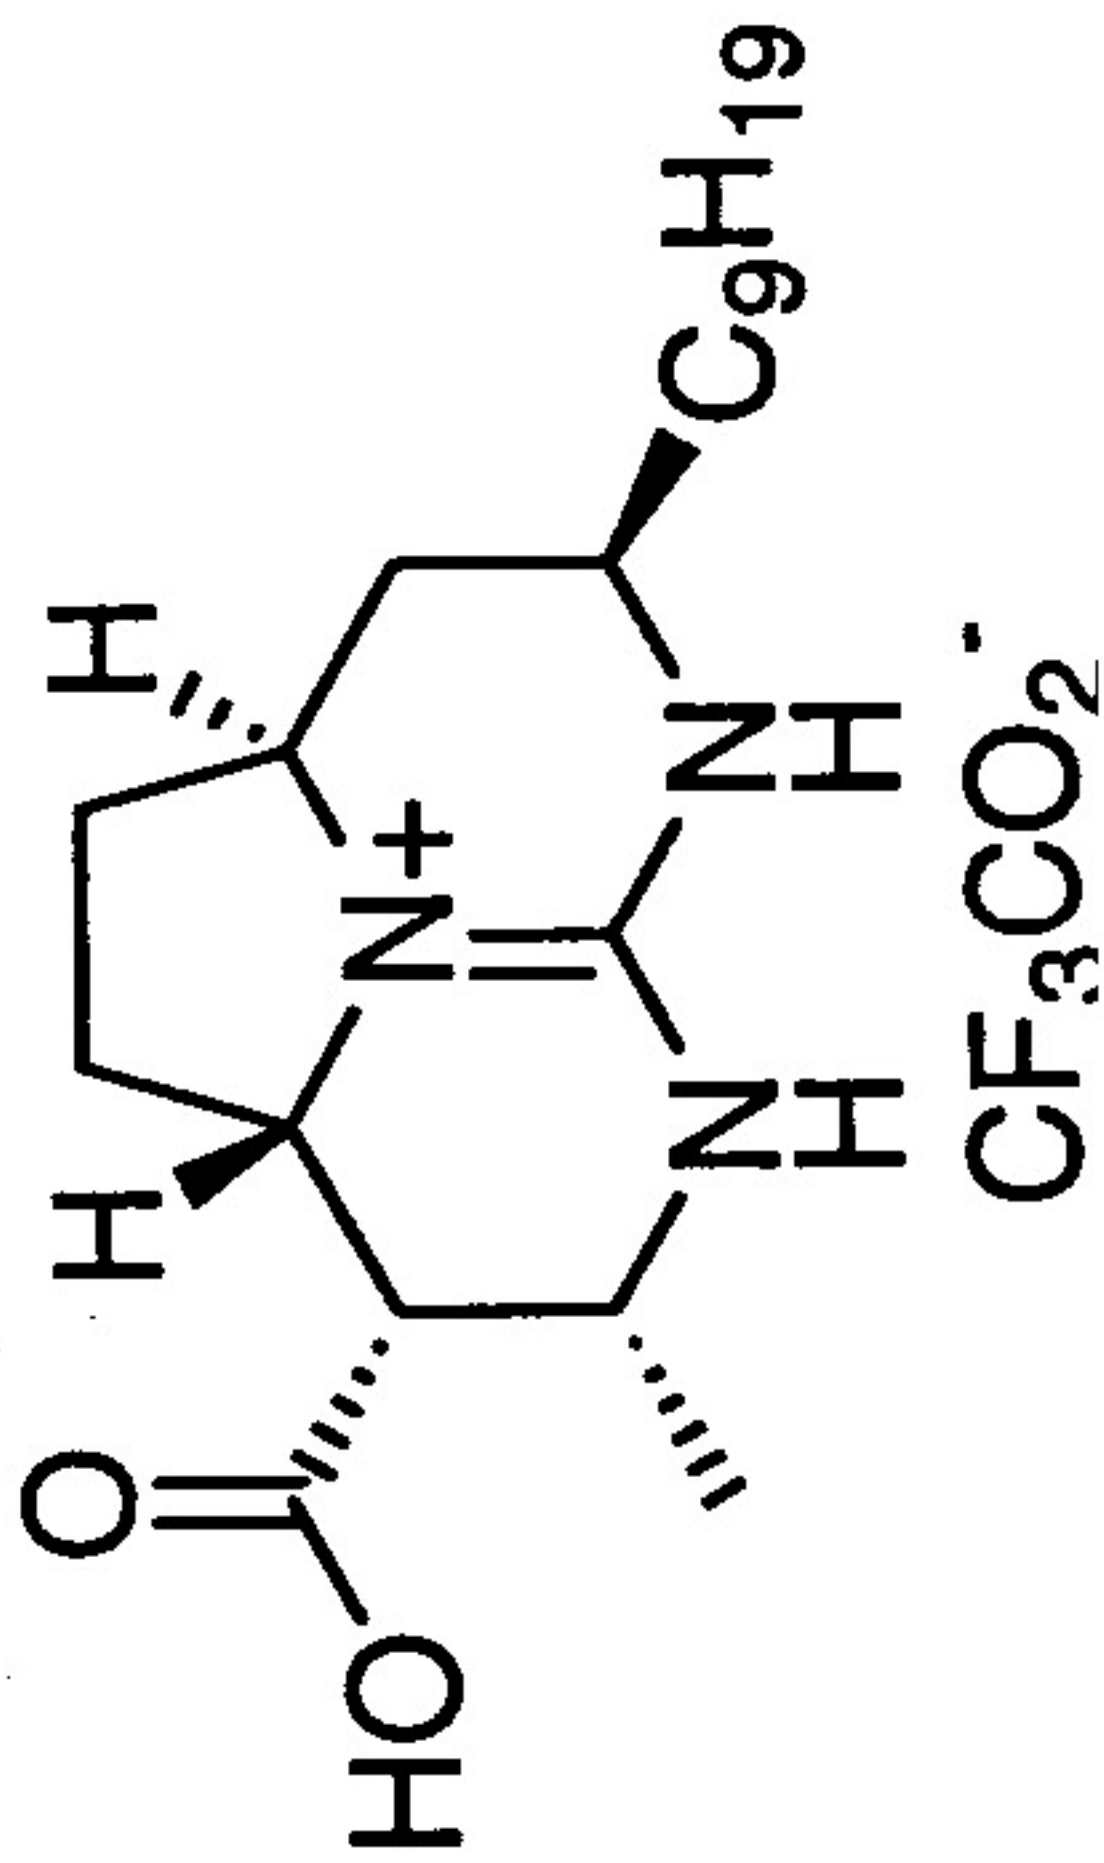

Integrals

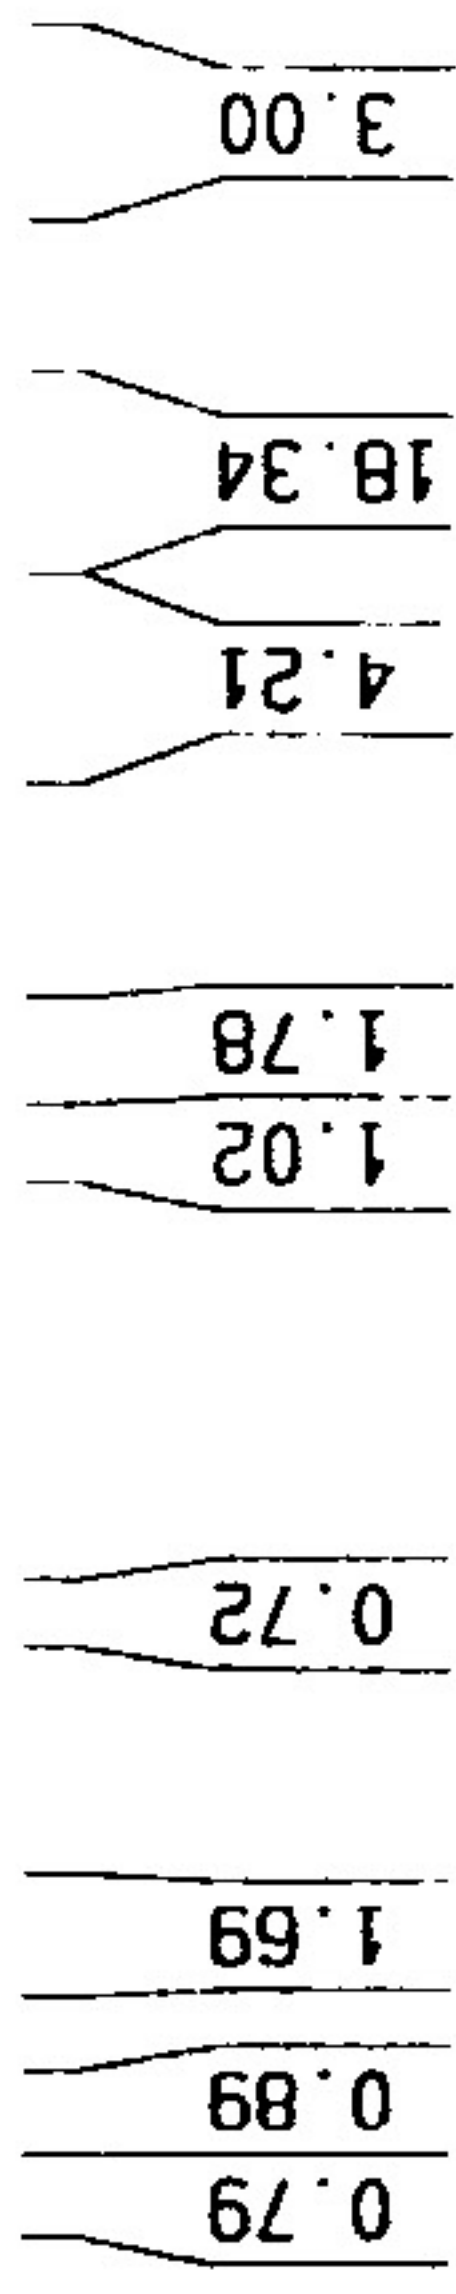

ppm

Current Data Parameters  
 NAME fc-1v-230a  
 EXPNO 3  
 PROCNO 1  
 172.56

F2 - Acquisition Parameters

Date\_ 20000114  
 Time 6.35  
 INSTRUM spect  
 PROBHD 5 mm broadband  
 PULPROG zgdc  
 TD 32768  
 SOLVENT C6D6  
 NS 9000  
 DS 0  
 SWH 31446.541 Hz  
 FIDRES 0.959672 Hz  
 AQ 0.5210612 sec  
 RG 5792.6  
 DW 15.900 usec  
 DE 4.50 usec  
 TE 300.0 K  
 D1 2.0000000 sec  
 D11 0.0300000 sec

----- CHANNEL f1 -----

NUC1 13C  
 P1 3.00 usec  
 PL1 0.00 dB  
 SFO1 125.7105882 MHz

----- CHANNEL f2 -----

CPDPRG2 waltz16  
 NUC2 1H  
 PCPD2 79.50 usec  
 PL2 120.00 dB  
 PL12 15.00 dB  
 SFO2 499.8924995 MHz

F2 - Processing parameters

SI 32768  
 SF 125.6972651 MHz  
 WDW EM  
 SSB 0  
 LB 1.00 Hz  
 GB 0  
 PC 1.00

1D NMR plot parameters

CX 25.00 cm  
 F1P 200.000 ppm  
 F1 25139.45 Hz  
 F2P 0.000 ppm  
 F2 0.00 Hz  
 PRNCH 8.00000 ppm/cm

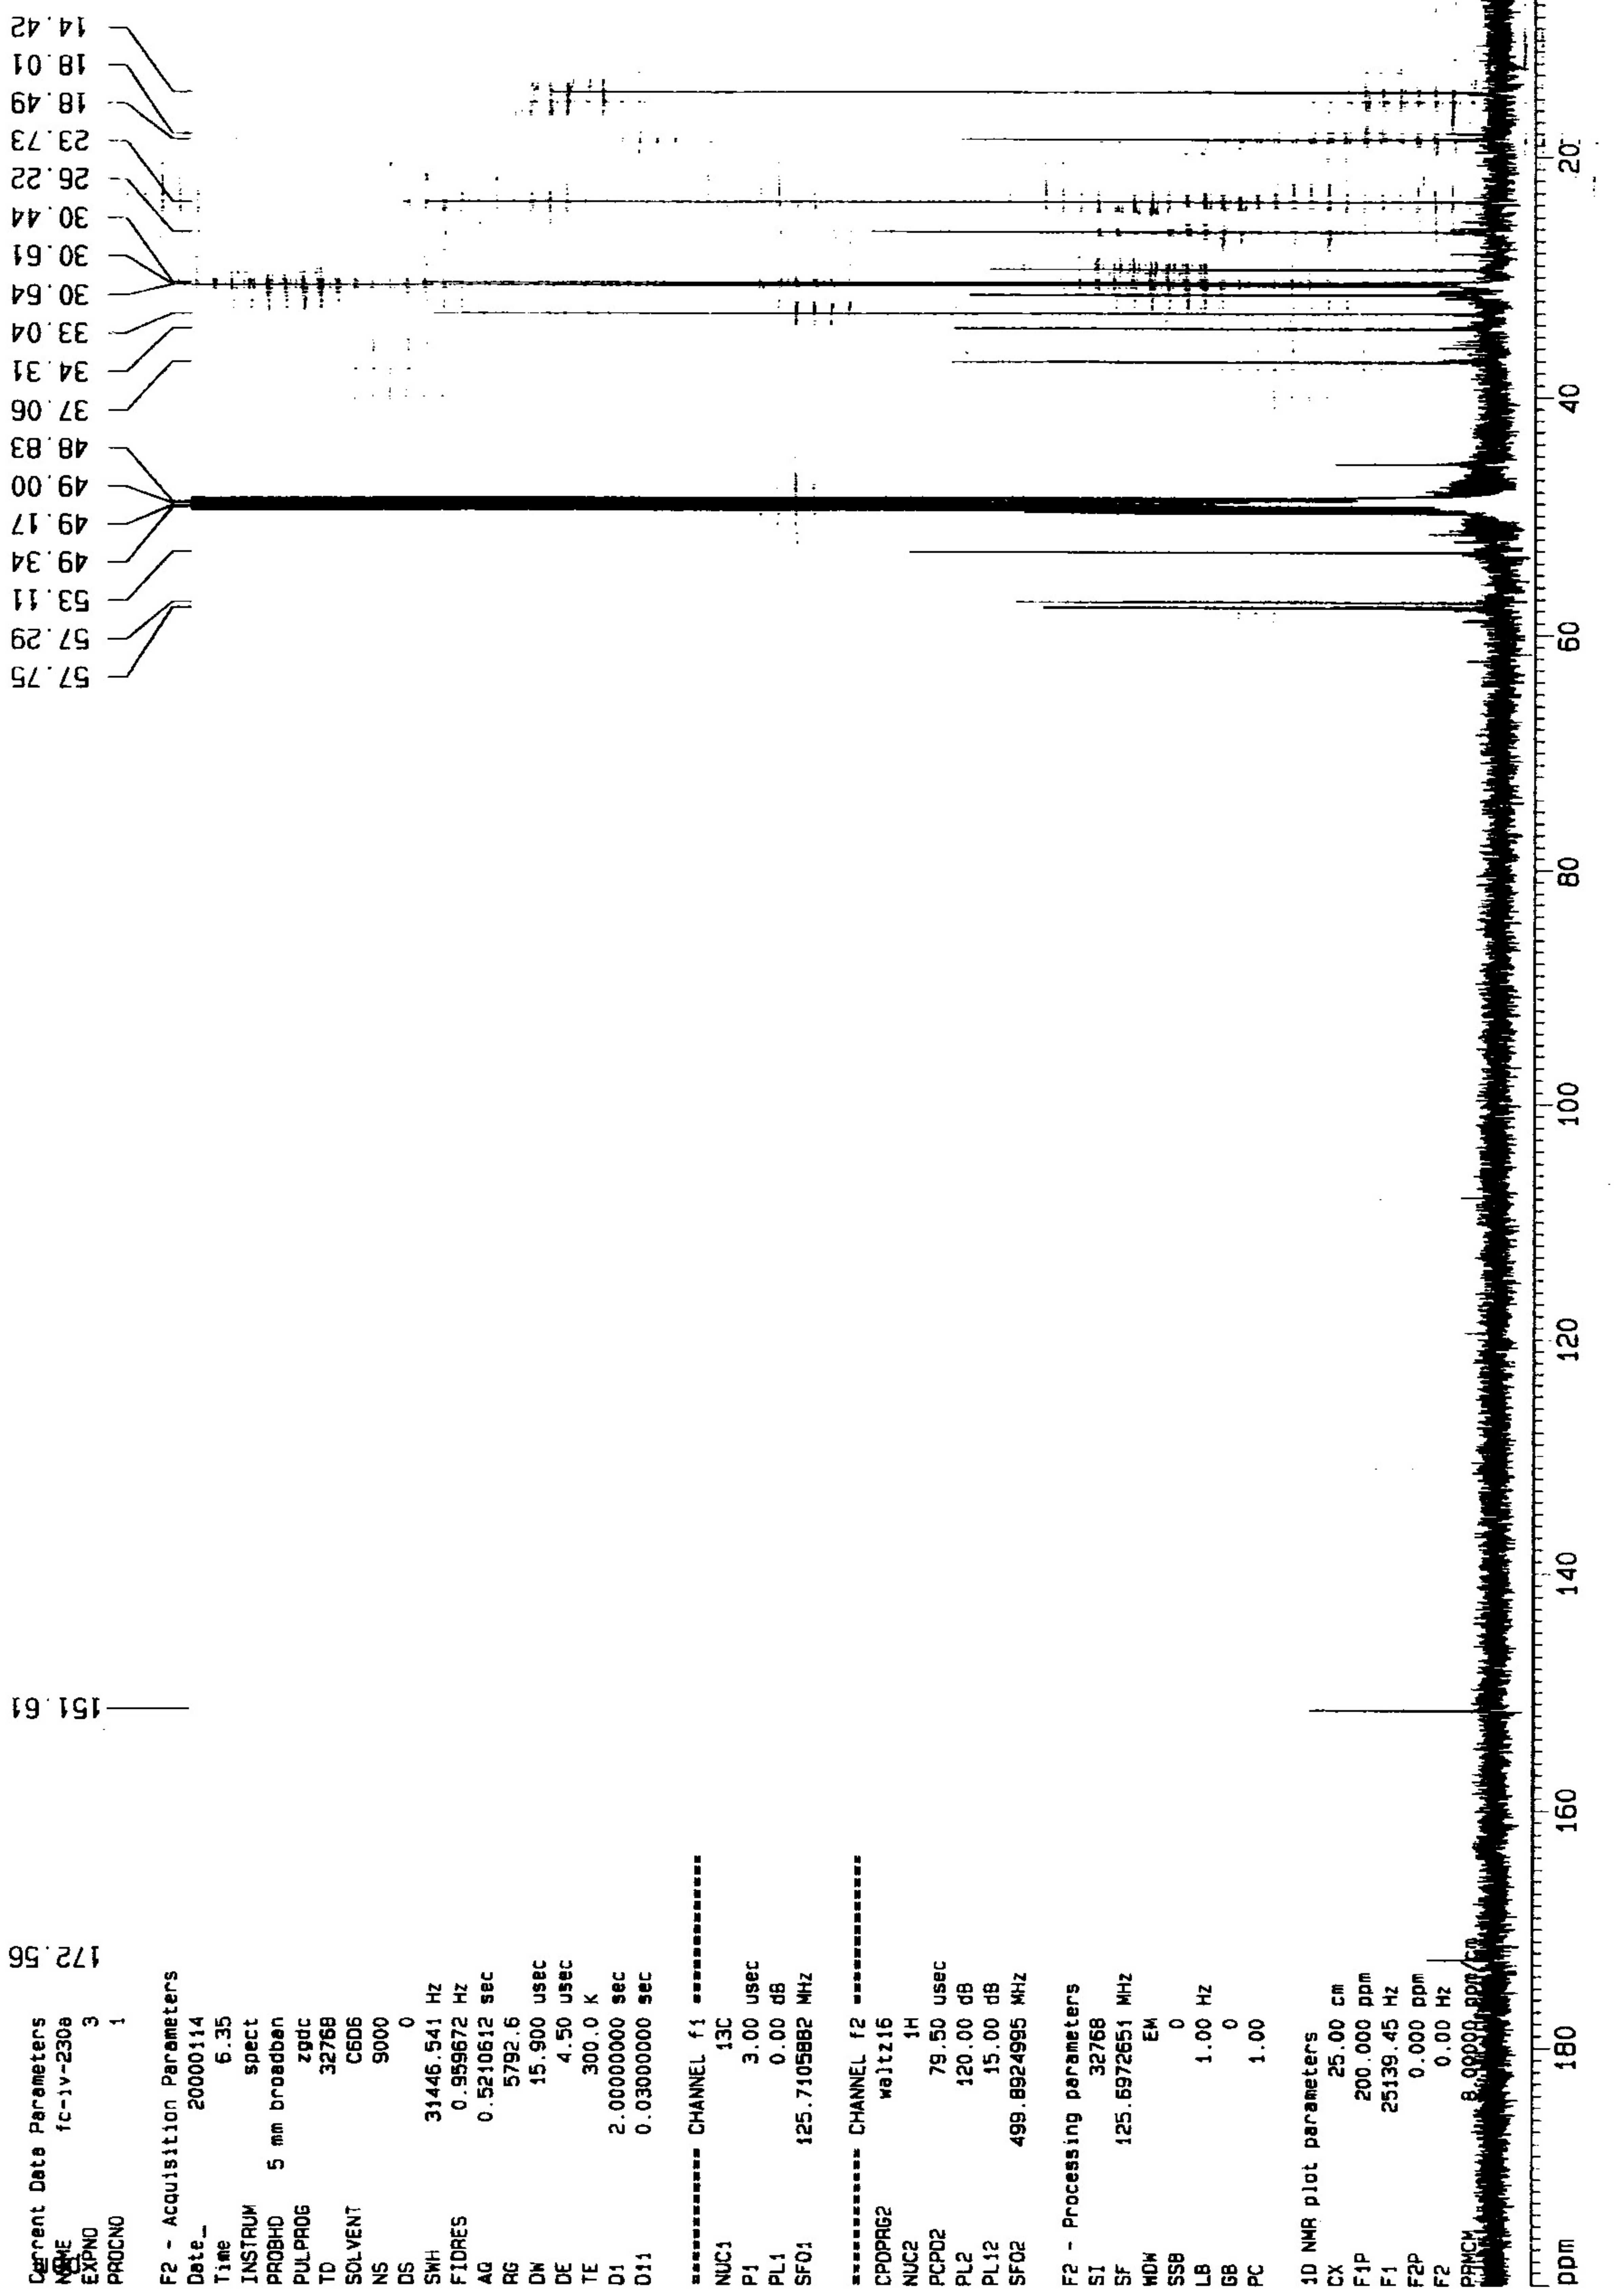

57.75  
 57.29  
 53.11  
 49.34  
 49.17  
 49.00  
 48.83  
 37.06  
 34.31  
 33.04  
 30.64  
 30.61  
 30.44  
 26.22  
 23.73  
 18.49  
 18.01  
 14.42

180  
 160  
 140  
 120  
 100  
 80  
 60  
 40  
 20  
 ppm

Current Data Parameters  
NAME fc-1v-247b  
EXPNO 1  
PROCNO 1

F2 - Acquisition Parameters

Date\_ 20000205  
Time 9.27  
INSTRUM spect  
PROBHD 5 mm Broadband  
PULPROG zg  
TD 32768  
SOLVENT CDC13  
NS 32  
DS 2  
SWH 6009.615 Hz  
FIDRES 0.183369 Hz  
AQ 2.7263477 sec  
RG 322.5  
DM 83.200 usec  
DE 6.00 usec  
TE 300.0 K  
D1 1.00000000 sec

\*\*\*\*\* CHANNEL f1 \*\*\*\*\*

NUC1 1H  
P1 4.00 usec  
PL1 0.00 dB  
SFO1 499.8924955 MHz

F2 - Processing parameters

SI 32768  
SF 499.8900192 MHz  
WDW EM  
SSB 0  
LB 0.30 Hz  
GB 0  
PC 1.00

1D NMR plot parameters

CX 29.12 cm  
F1P 10.000 ppm  
F1 4998.90 Hz  
F2P -0.500 ppm  
F2 -249.95 Hz  
PPMCH 0.37333 ppm/cm  
HZCM 186.62561 Hz/cm

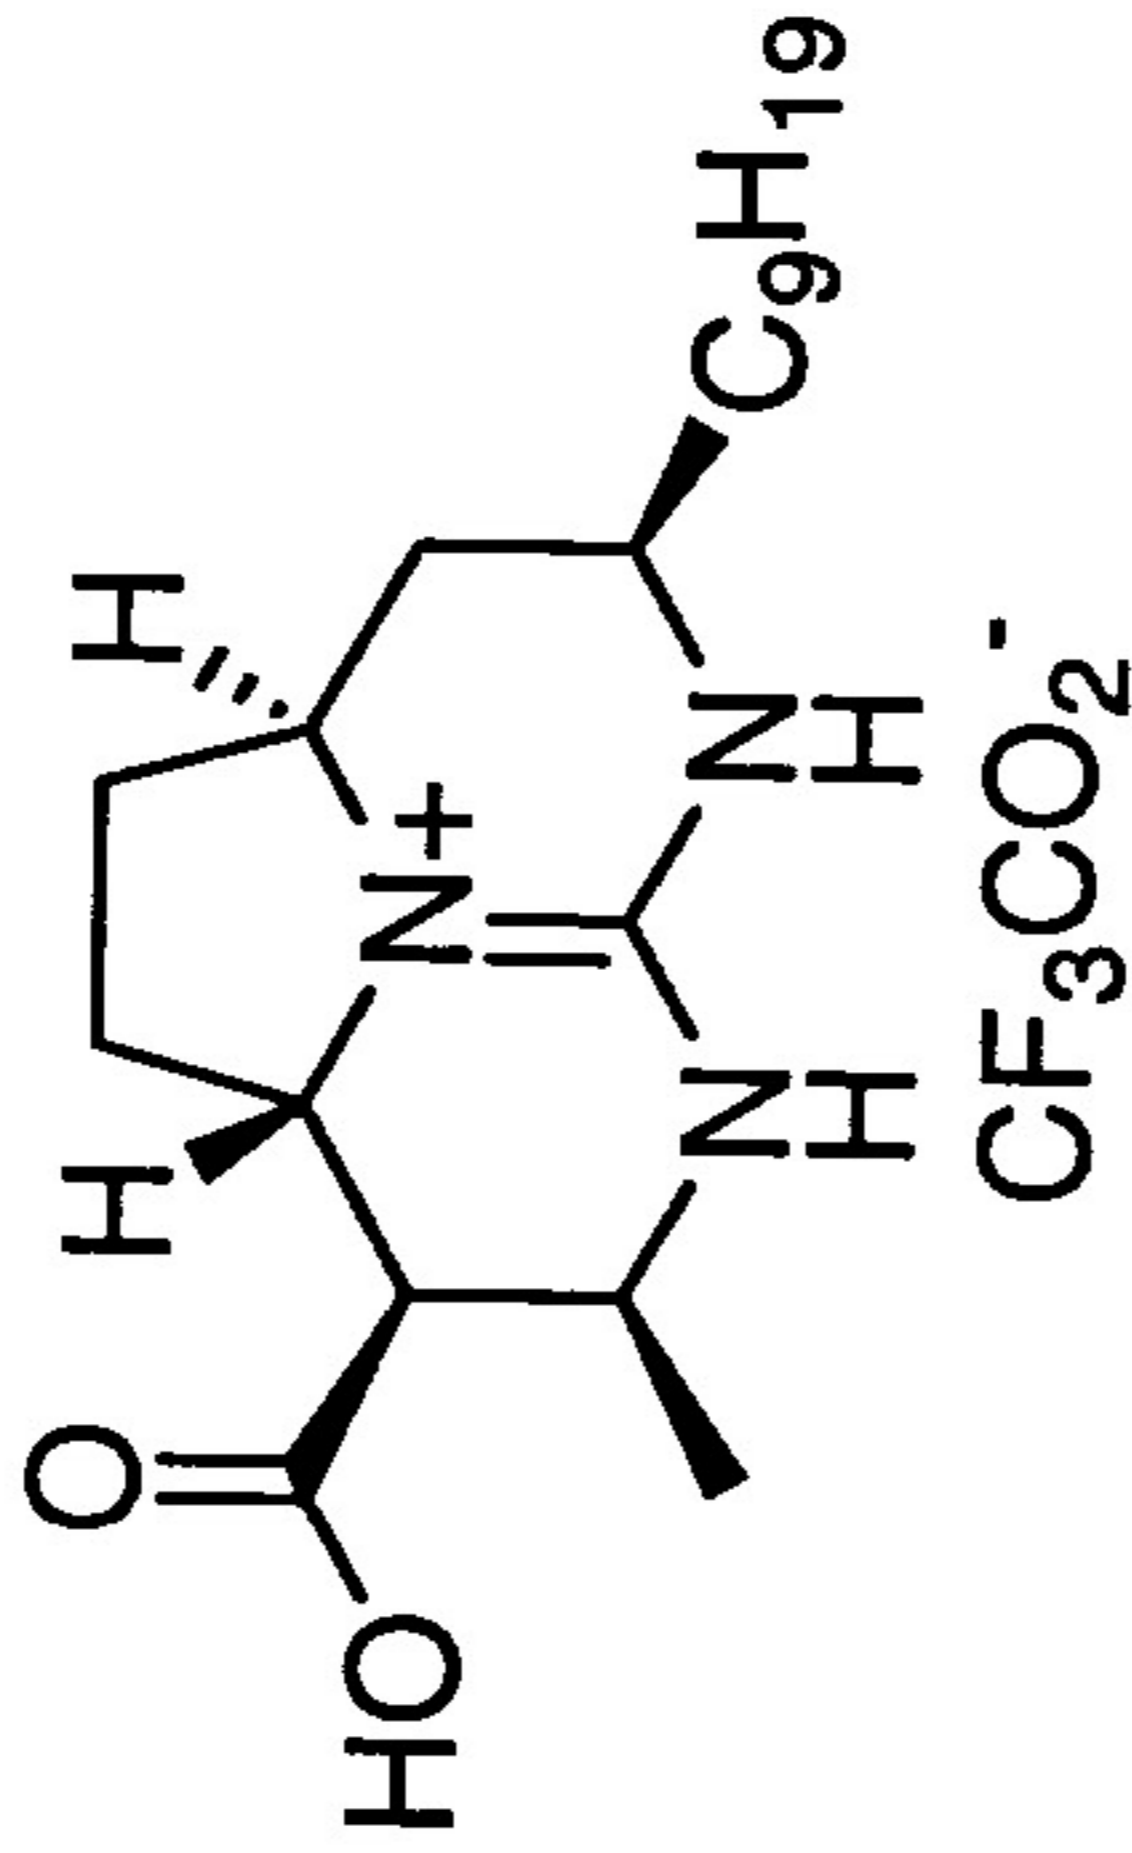

Integral

1.05

1.35

1.18

1.24

1.00

1.14

1.48

1.64

6.21

21.76

3.33

4.38

S97

ppm

6

8

7

6

5

4

3

2

1

14.42  
19.49  
23.73  
26.22  
30.44  
30.63  
30.65  
31.56  
33.04  
36.86  
48.83  
49.00  
49.17  
49.34  
53.21  
57.12

151.03

172.29

ppm

ppm

20  
40  
60  
80  
100  
120  
140  
160  
180

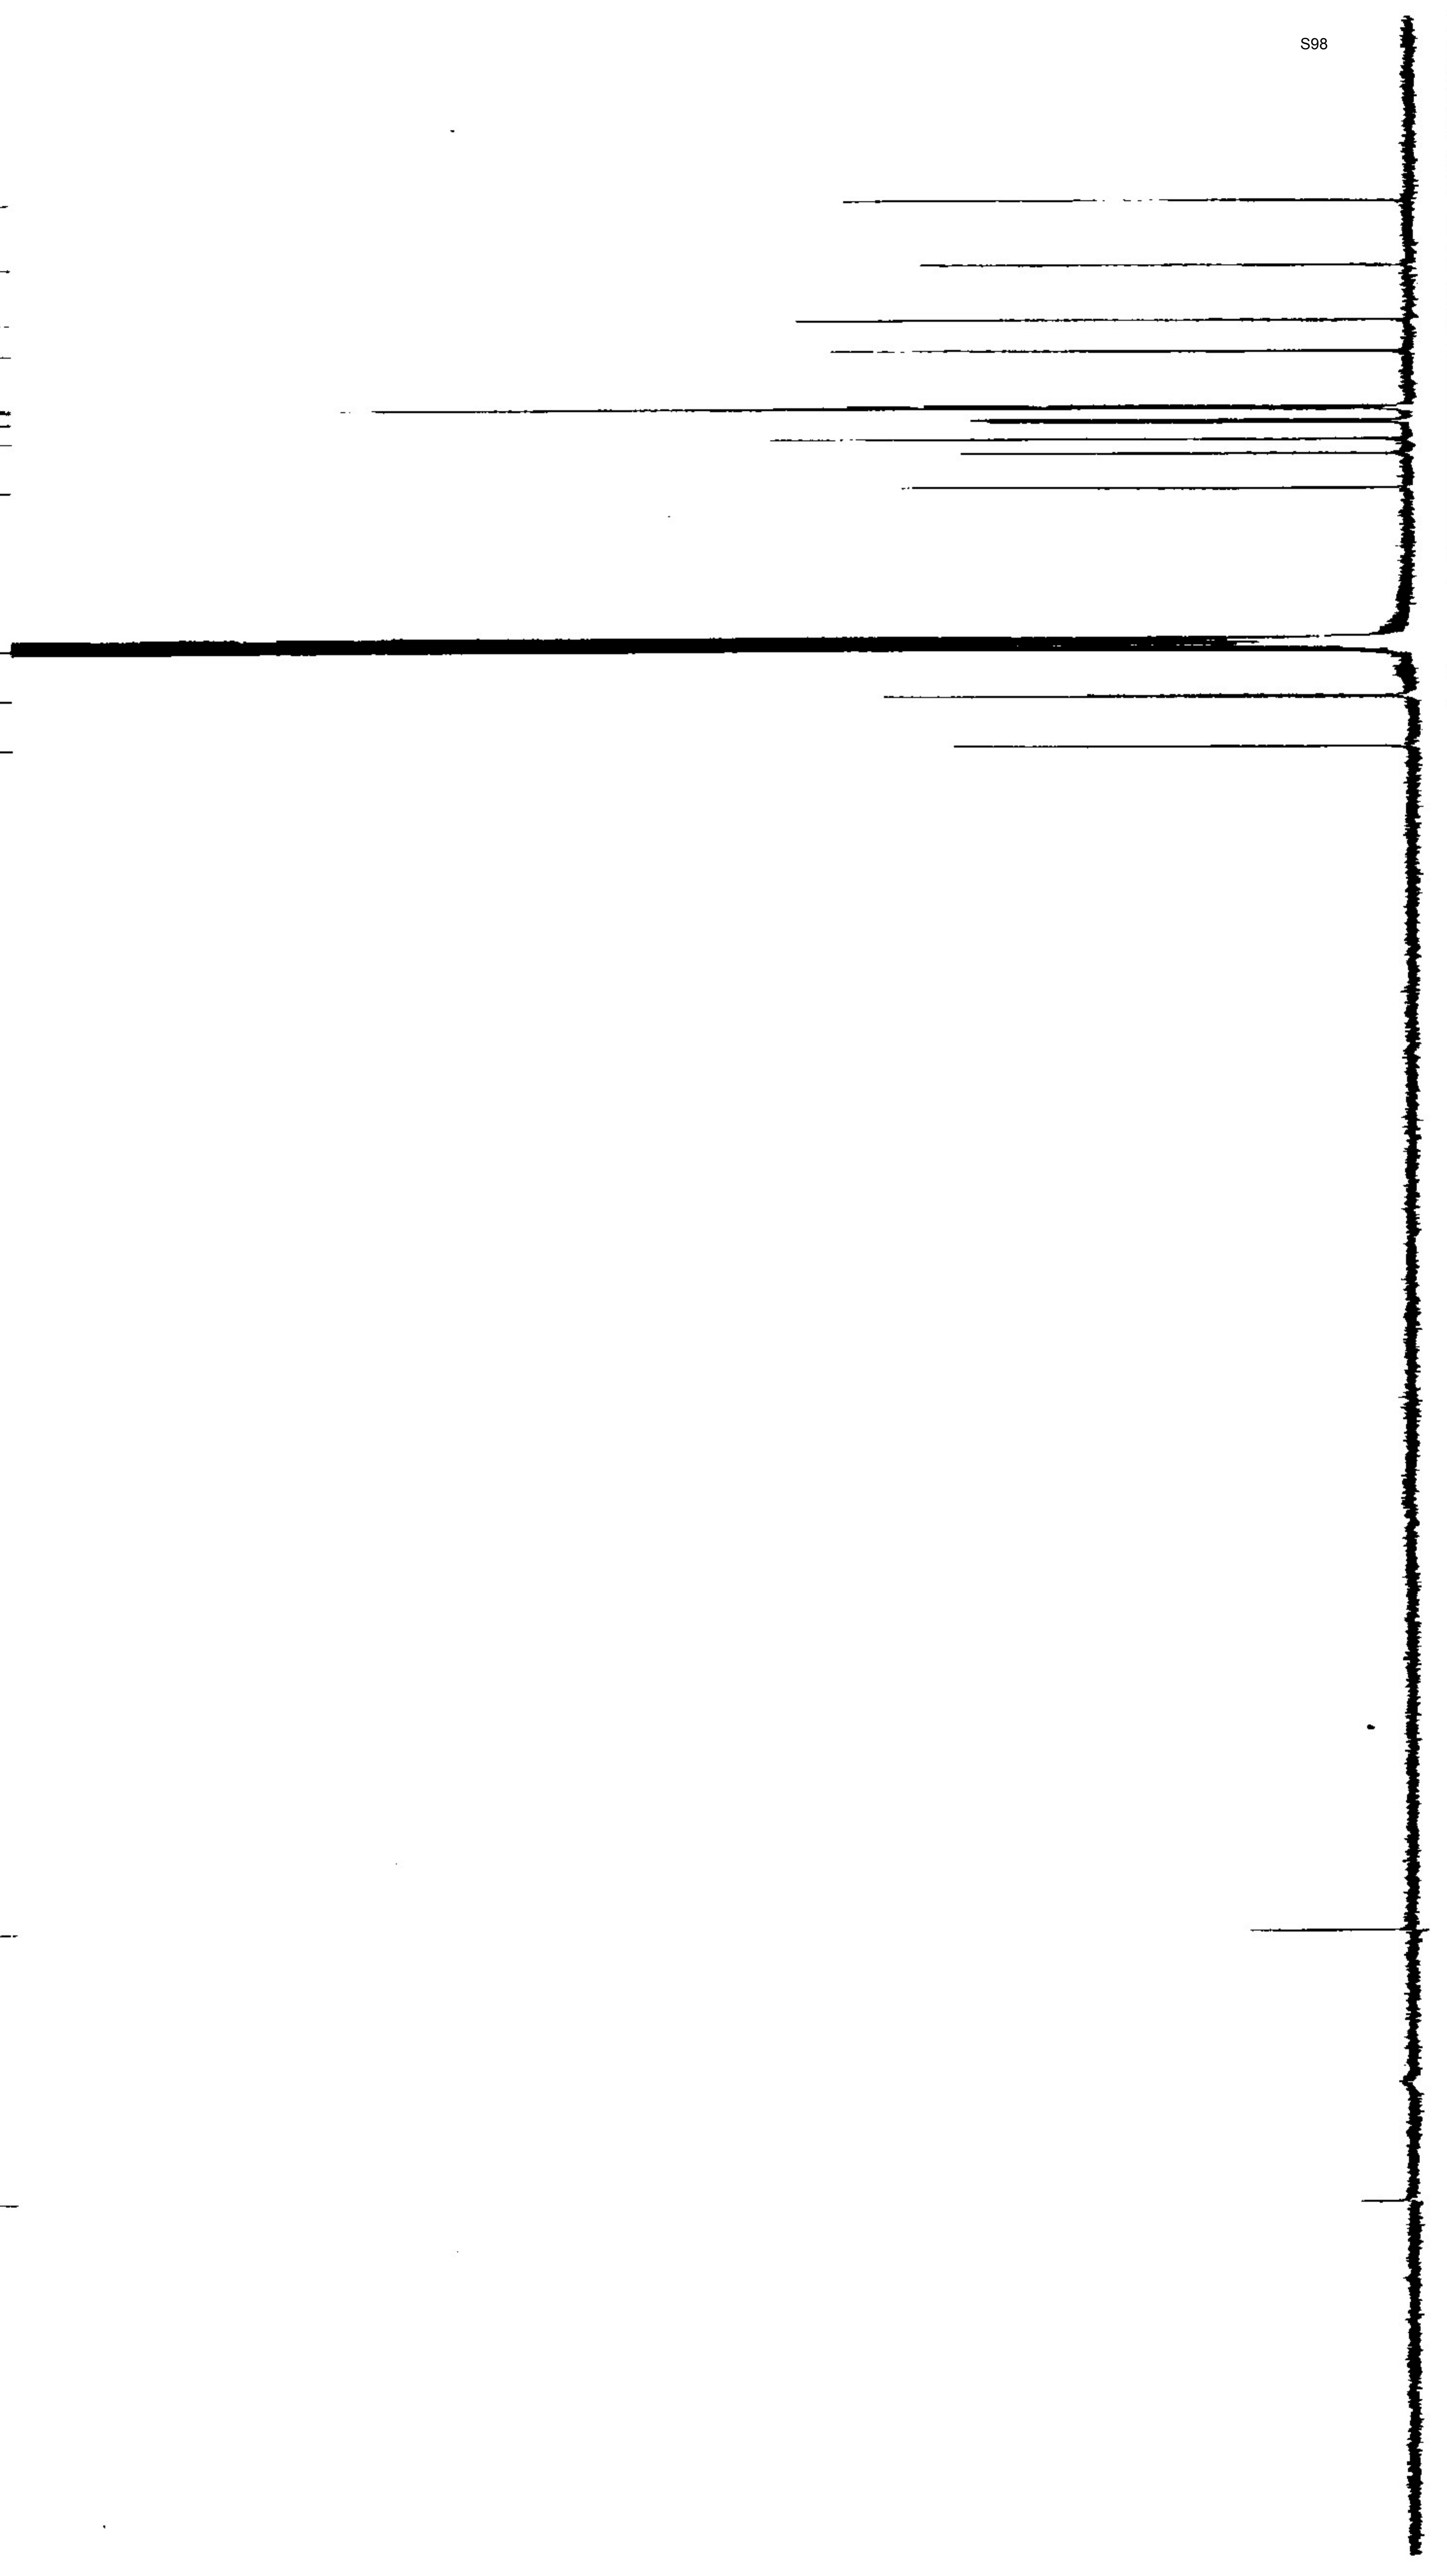

Current Data Parameters  
 USER fcohen  
 NAME fc-v-195b  
 EXPNO 1  
 PROCNO 1

F2 Acquisition Parameters

Date 20001201  
 Time 10.04  
 INSTRUM gn500  
 PROBH0 5 mm broadband  
 PULPROG zg30  
 ID 65536  
 SOLVENT CDCl3  
 NS 32  
 DS 2  
 SWH 8012.820 HZ  
 FIDRES 0.122266 HZ  
 AQ 4.0894966 sec  
 RG 406.4  
 DW 52.400 usec  
 DE 6.00 usec  
 TE 300.0 K  
 D1 0.10000000 sec

\*\*\*\*\* CHANNEL f1 \*\*\*\*\*

NUC1 1H  
 P1 12.00 usec  
 PL1 -3.00 dB  
 SF01 500.1335008 MHz

F2 - Processing parameters

SI 32768  
 SF 500.1300160 MHz  
 KDN EM  
 SSB 0  
 LB 0.30 HZ  
 GR 0  
 PC 1.00

1D NMR plot parameters

CX 14.75 cm  
 F1P 10.000 ppm  
 F1 5001.30 HZ  
 F2P 0.500 ppm  
 F2 -250.07 HZ  
 ppmCM 0.71186 ppm/cm  
 HZCM 356.02475 HZ/cm

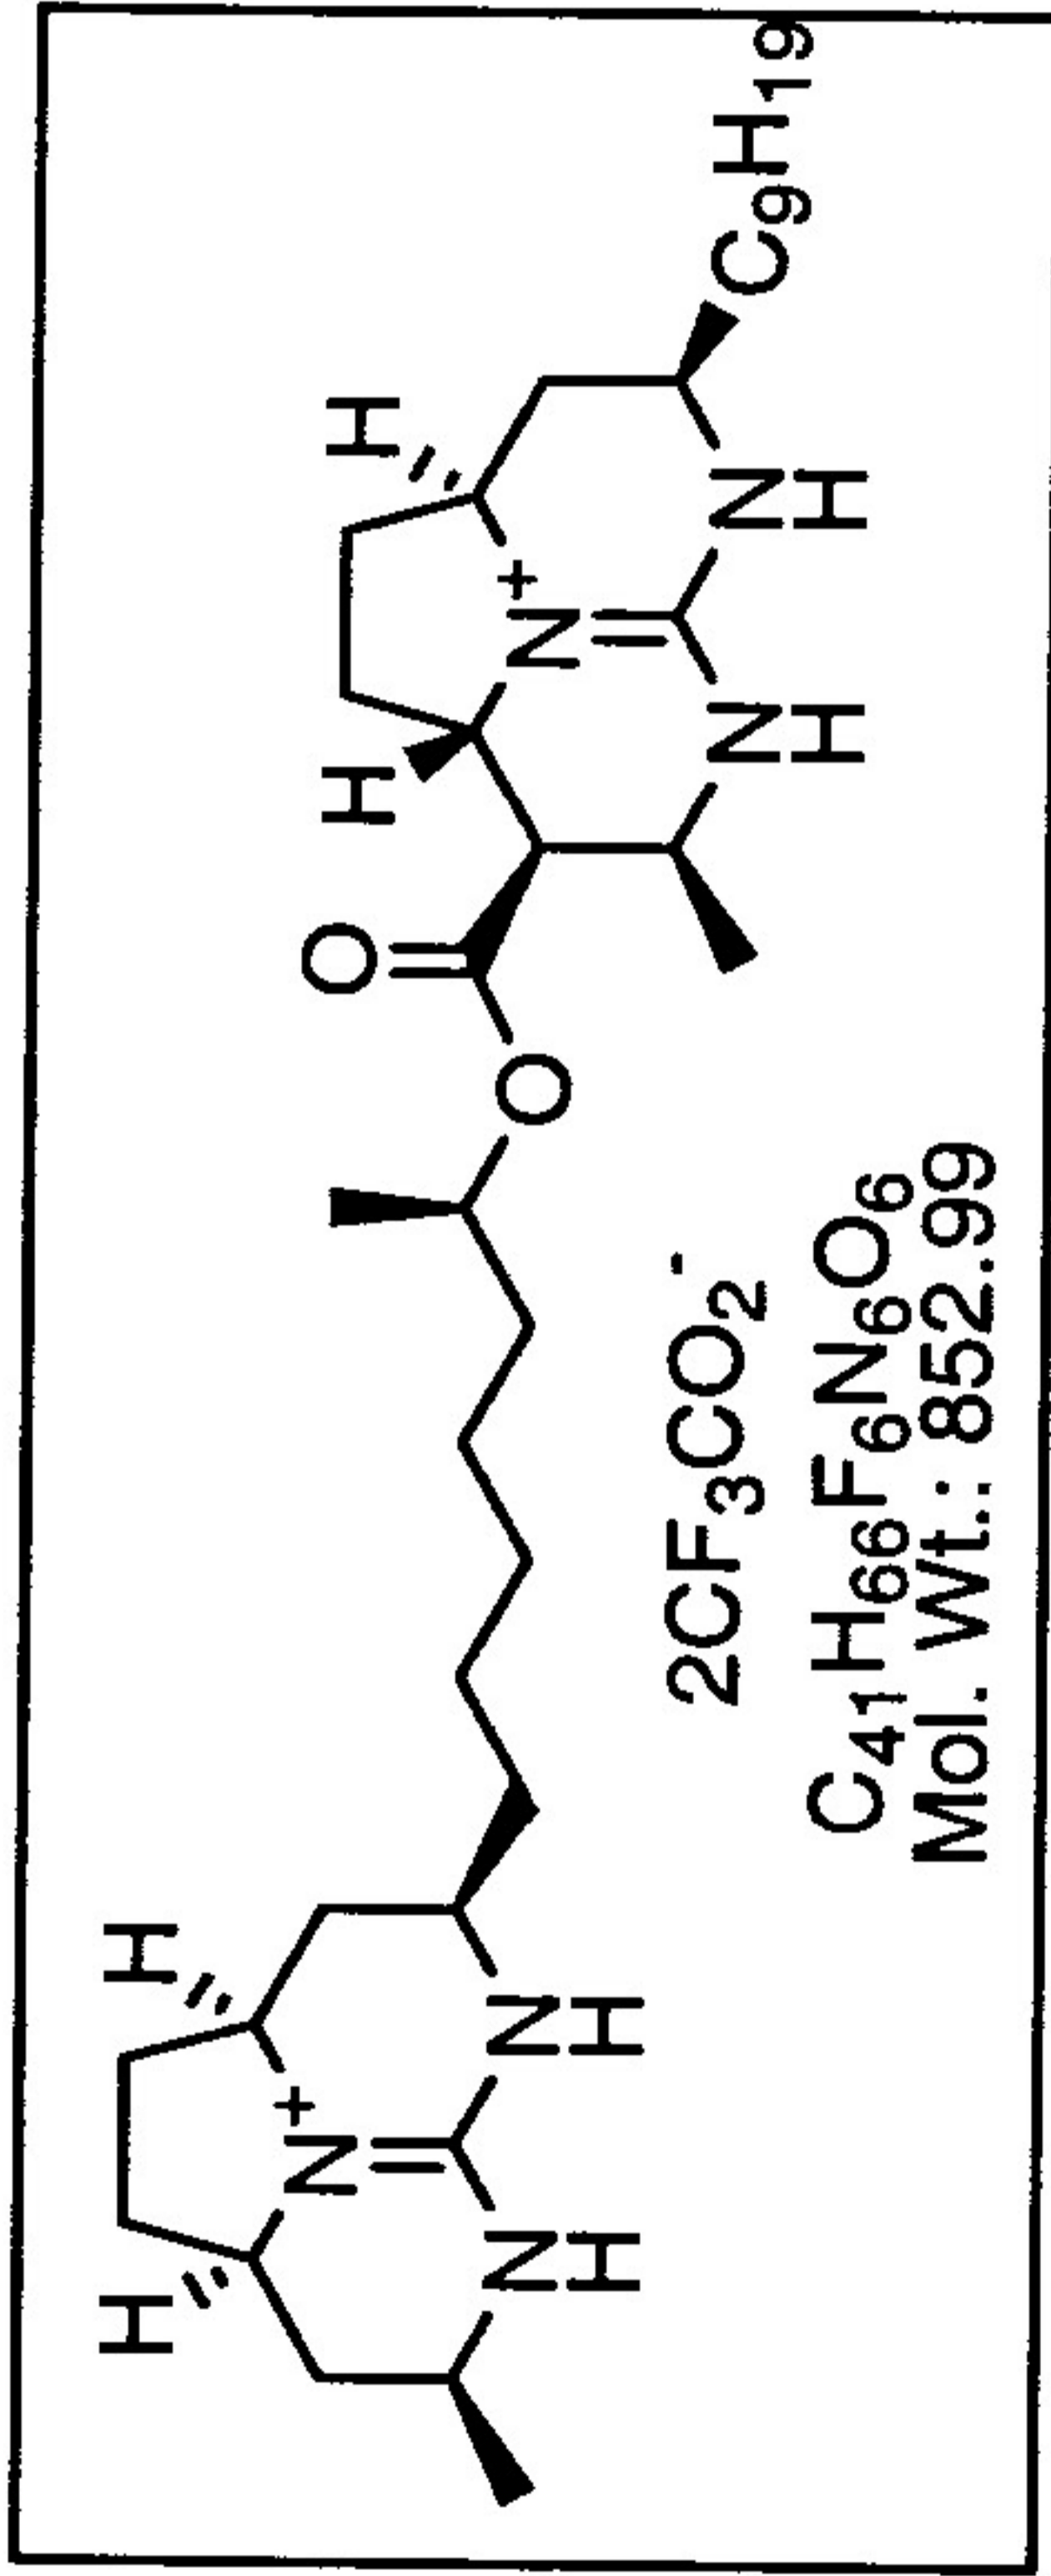

Integral

1.27

0.98

2.83

1.37

2.01

1.05

1.00

1.08

1.21

4.81

9.98

29.41

3.01

3.24

ppm

4

2

0

Current Data Parameters  
USER Iconan  
NAME fc-v-1950  
EXPNO 4  
PROCNO 1

F2 - Acquisition Parameters

Date\_ 20001219  
Time 7.06  
INSTRUM gn500  
PROBHD 5 mm broadband  
PULPROG zgpg30  
TD 65536  
SOLVENT CD300  
NS 18978  
DS 2  
SWH 30185.178 Hz  
FIDRES 0.460589 Hz  
AQ 1.0856159 sec  
RG 1290 2  
DM 16.564 usec  
DE 4.50 usec  
TE 300.0 K  
D1 0.25000000 sec  
D11 0.03000000 sec

===== CHANNEL f1 =====

NUC1 13C  
P1 6.25 usec  
PL1 0.00 dB  
SFO1 125.7715724 MHz

===== CHANNEL f2 =====

CPROG2 waltz16  
NUC2 1H  
PCPD2 80.00 usec  
PL2 -3.00 dB  
PL12 13.50 dB  
SFO2 500.1340000 MHz

F2 Processing parameters

SI 65536  
SF 125.7576424 MHz  
WDW EM  
SSB 0  
EB 1.00 Hz  
GB 0  
PC 2.00

1D NMR plot parameters

CX 14.75 cm  
F1p 200.000 ppm  
F1 25151.53 Hz  
F2p 0.000 ppm  
F2 0.00 Hz  
PPMCM 13.55932 ppm/cm  
HZCM 1705.18823 Hz/cm

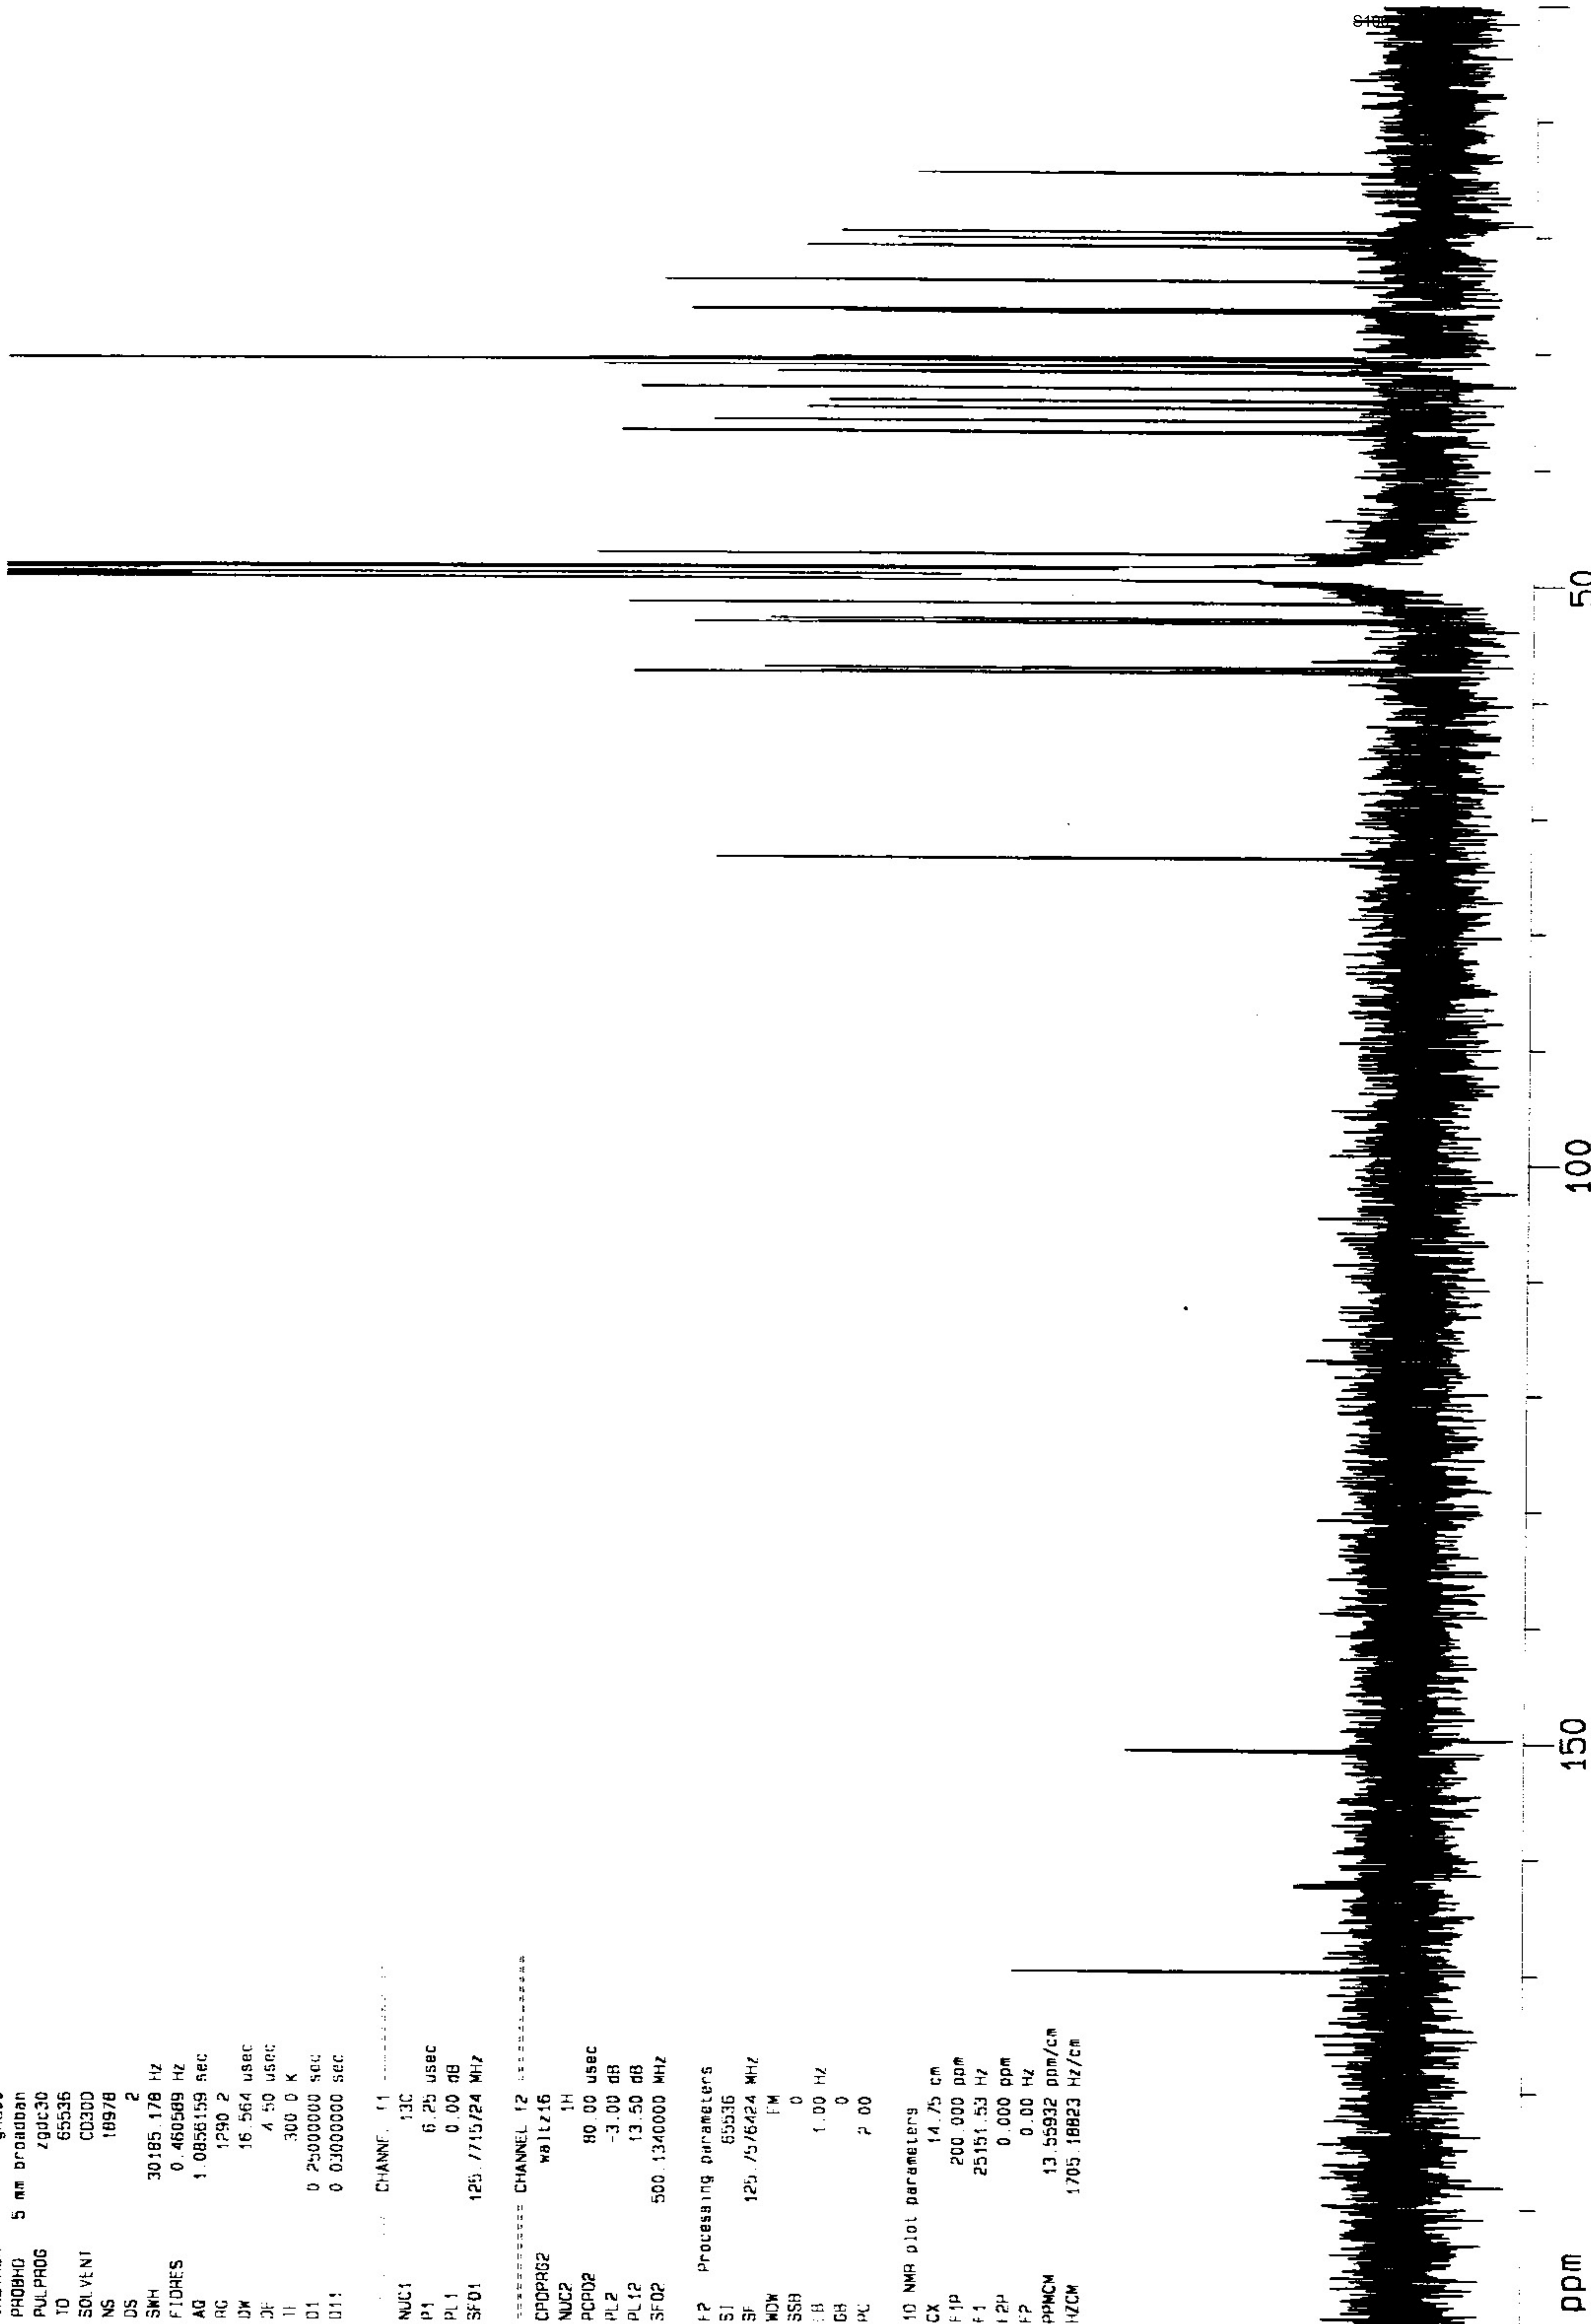

Current Data Parameters  
 USER fconen  
 NAME 1c-1v-259  
 EXPNO 3  
 PROCNO 1

F2 Acquisition Parameters  
 Date 20001130  
 Time 22.59  
 INSTRUM gn500  
 PROBHD 5 mm broadband  
 PULPROG zg30  
 TD 65536  
 SOLVENT1 COCL3  
 NS 32  
 DS 2  
 SWH 8012.820 Hz  
 FIDRES 0.122266 Hz  
 AQ 4.0894966 sec  
 RG 408.4  
 DW 62.400 usec  
 DE 6.00 usec  
 TE 300.0 K  
 O1 0.1000000 sec

\*\*\*\*\* CHANNEL f1 \*\*\*\*\*  
 NUC1 1H  
 P1 12.00 usec  
 PL1 -3.00 dB  
 SFO1 500.1335009 MHz

IP Processing parameters  
 SI 32768  
 SF 500.1300158 MHz  
 WDW EM  
 SSB 0  
 GB 0.30 Hz  
 GH 0  
 PC 4.00

1D NMR plot parameters  
 CX 14.75 cm  
 F1P 10.000 ppm  
 F1 5001.30 Hz  
 F2P -0.500 ppm  
 F2 -250.07 Hz  
 PPMCM 0.71186 ppm/cm  
 HZCM 356.02475 Hz/cm

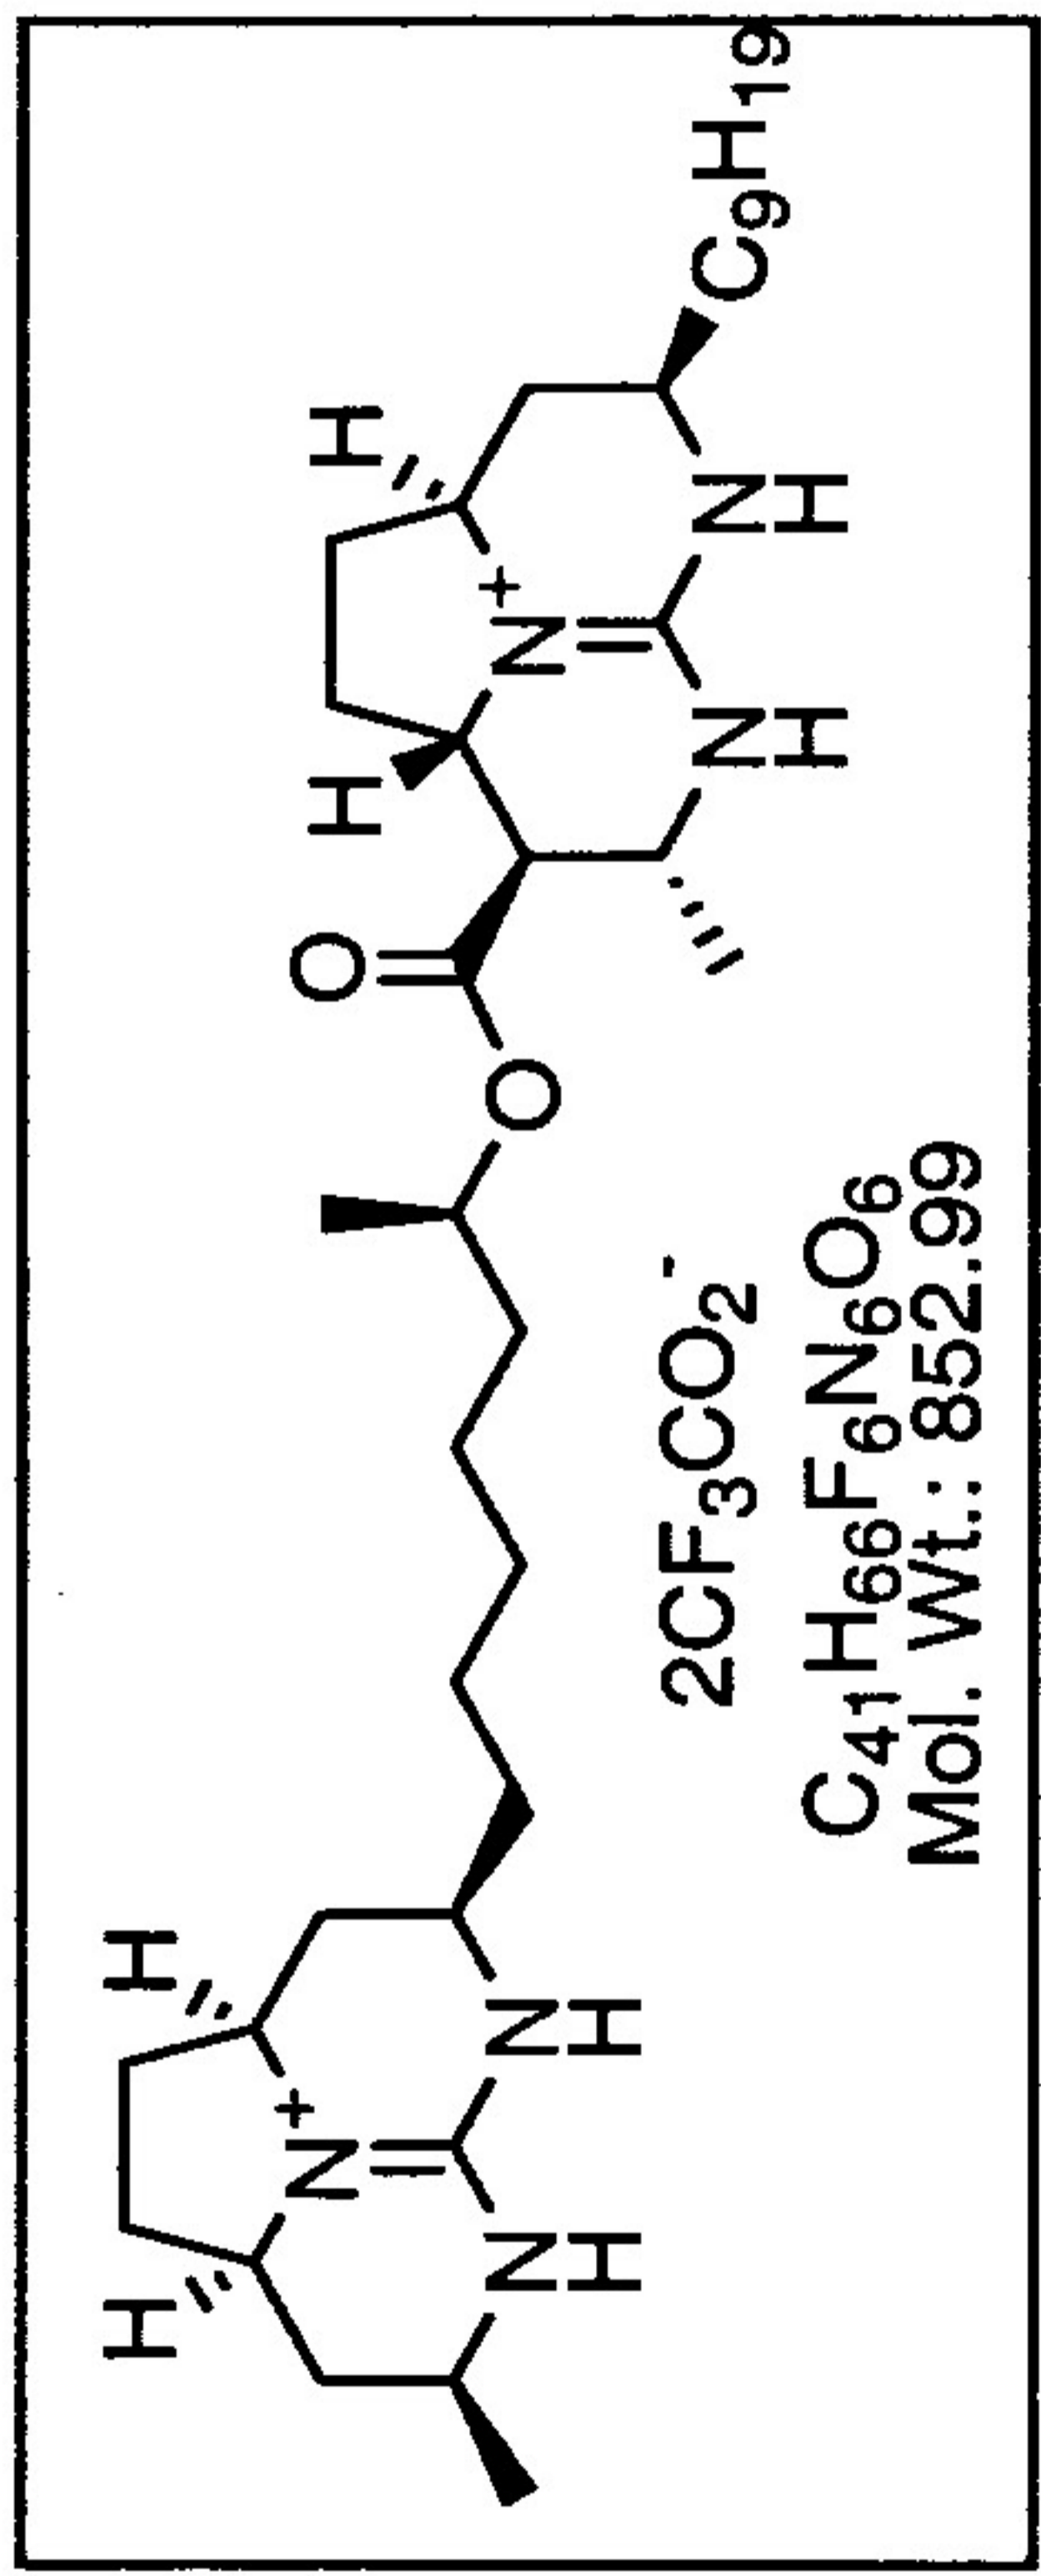

2CF<sub>3</sub>CO<sub>2</sub><sup>-</sup>  
 C<sub>41</sub>H<sub>66</sub>F<sub>6</sub>N<sub>6</sub>O<sub>6</sub>  
 Mol. Wt.: 852.99

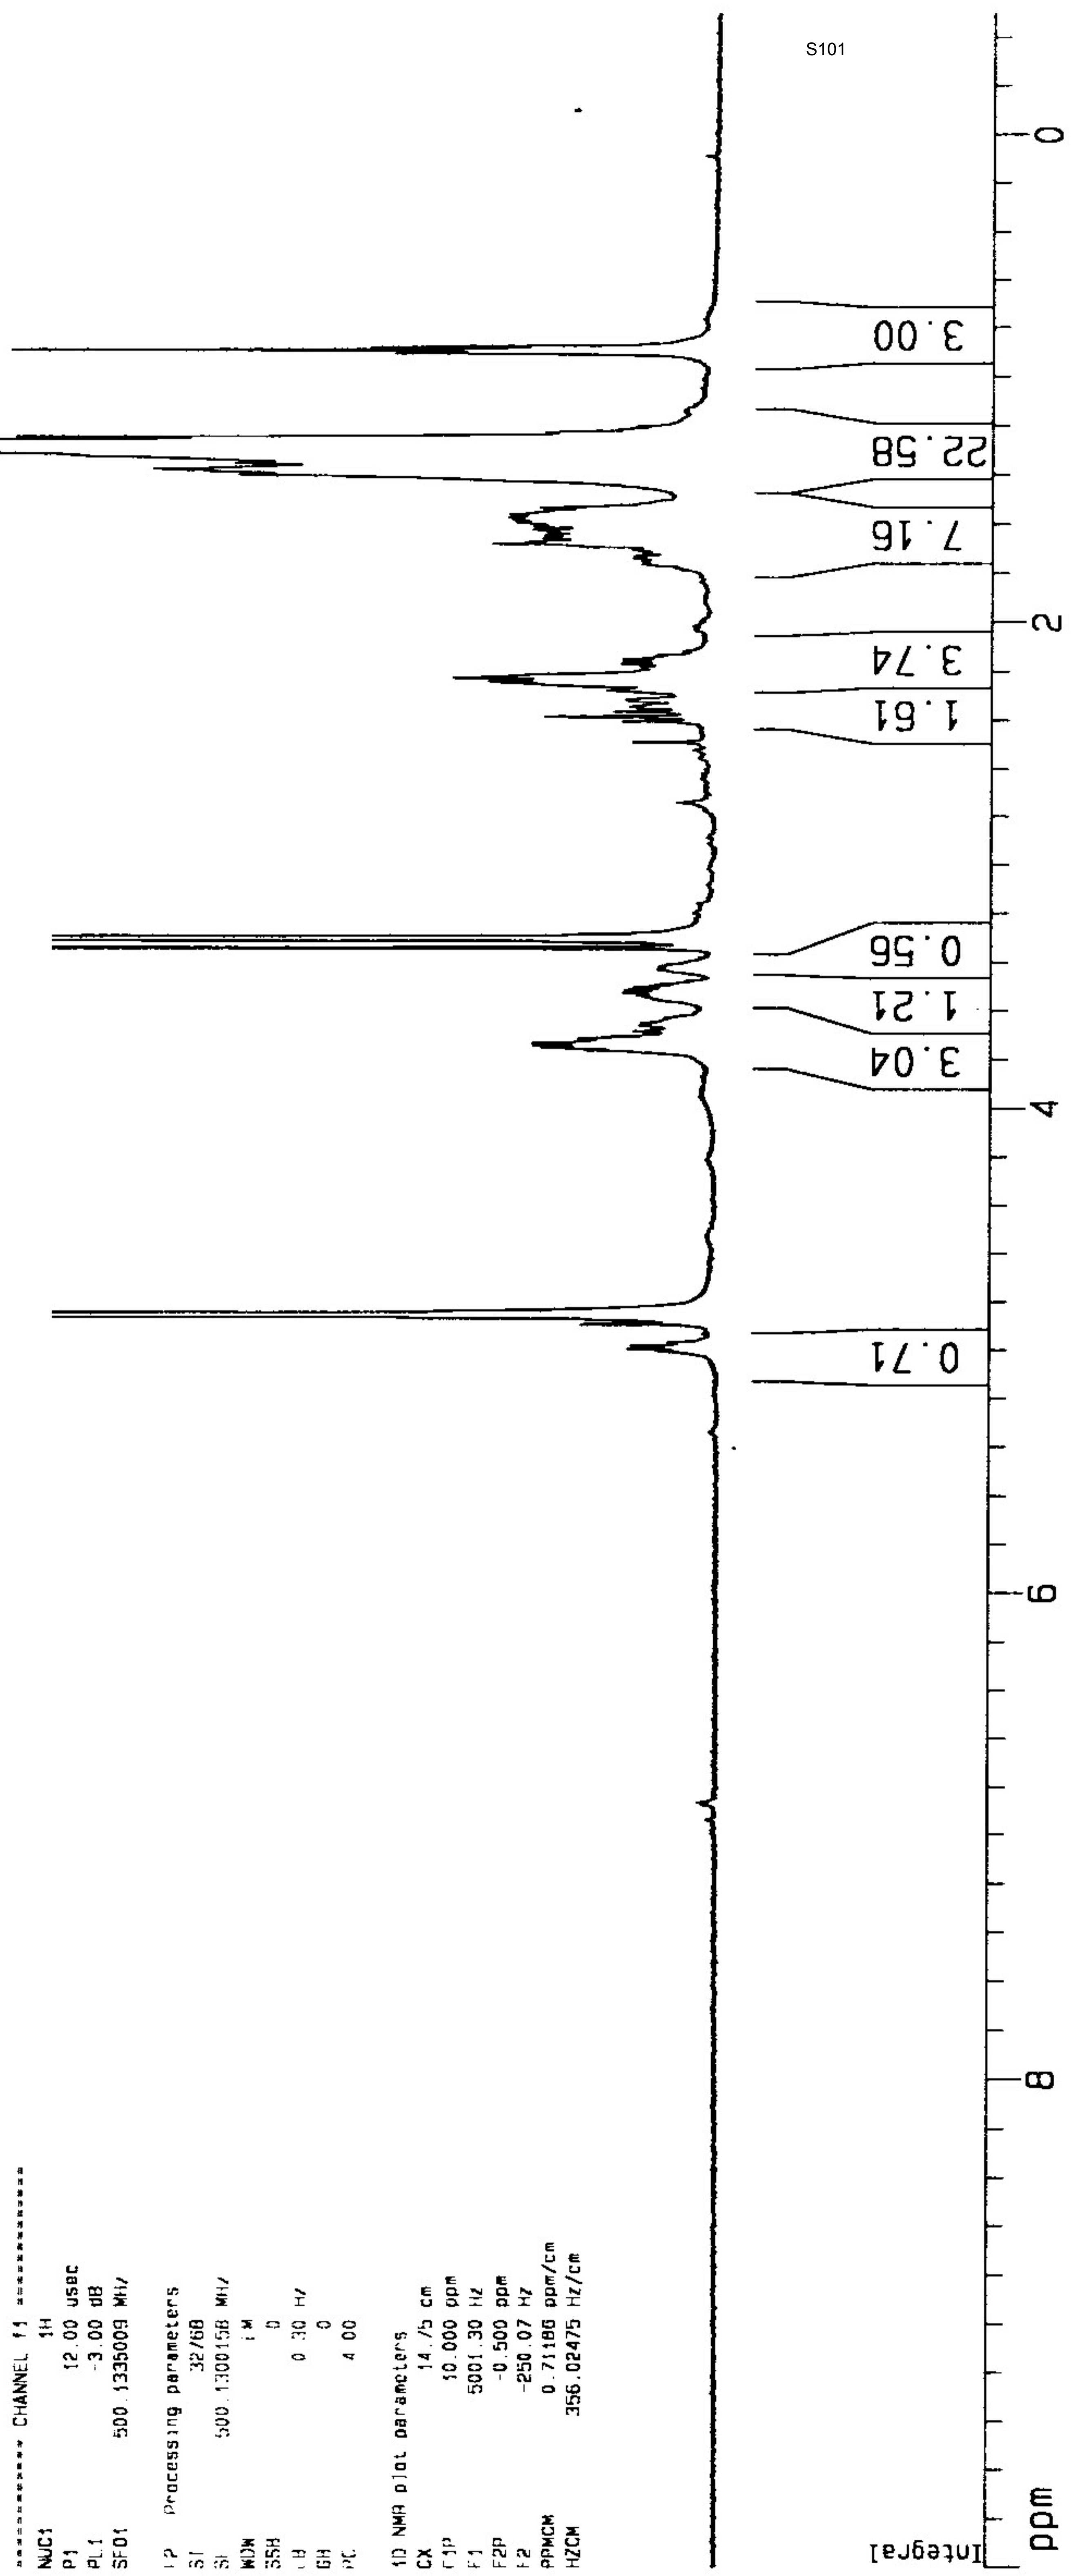



Current Data Parameters  
USER fcohen  
NAME 1c-1v-259  
EXPNO 4  
PROCNO 1

F2 - Acquisition Parameters

Date 20001201  
Time 6.50  
INSTRUM gn500  
PROBHD 5 mm broadband  
PULPROG zgpg30  
TD 65536  
SOLVENT CDCl3  
NS 21000  
DS 2  
SWH 30185.178 Hz  
FIDRES 0.450589 Hz  
AQ 1.0856159 sec  
RG 6502  
DM 16.564 usec  
DE 4.50 usec  
TE 300.0 K  
D1 0.25000000 sec  
D11 0.03000000 sec

===== CHANNEL f1 =====

NUC1 13C  
P1 6.25 usec  
PL1 0.00 dB  
SFO1 125.7715724 MHz

===== CHANNEL f2 =====

CPDPRG2 waltz16  
NUC2 1H  
PCPD2 80.00 usec  
PL2 -3.00 dB  
PL12 13.50 dB  
SFO2 500.1340000 MHz

F2 - Processing parameters

SI 65536  
SF 125.7576424 MHz  
WDW EM  
SSB 0  
LB 1.00 Hz  
GB 0  
PC 2.00

3D NMR plot parameters

CX 14.75 cm  
F1P 200.000 ppm  
F1 25151.53 Hz  
F2P 0.000 ppm  
F2 0.00 Hz  
PPMCM 13.55932 ppm/cm  
HZCM 1705.18823 Hz/cm

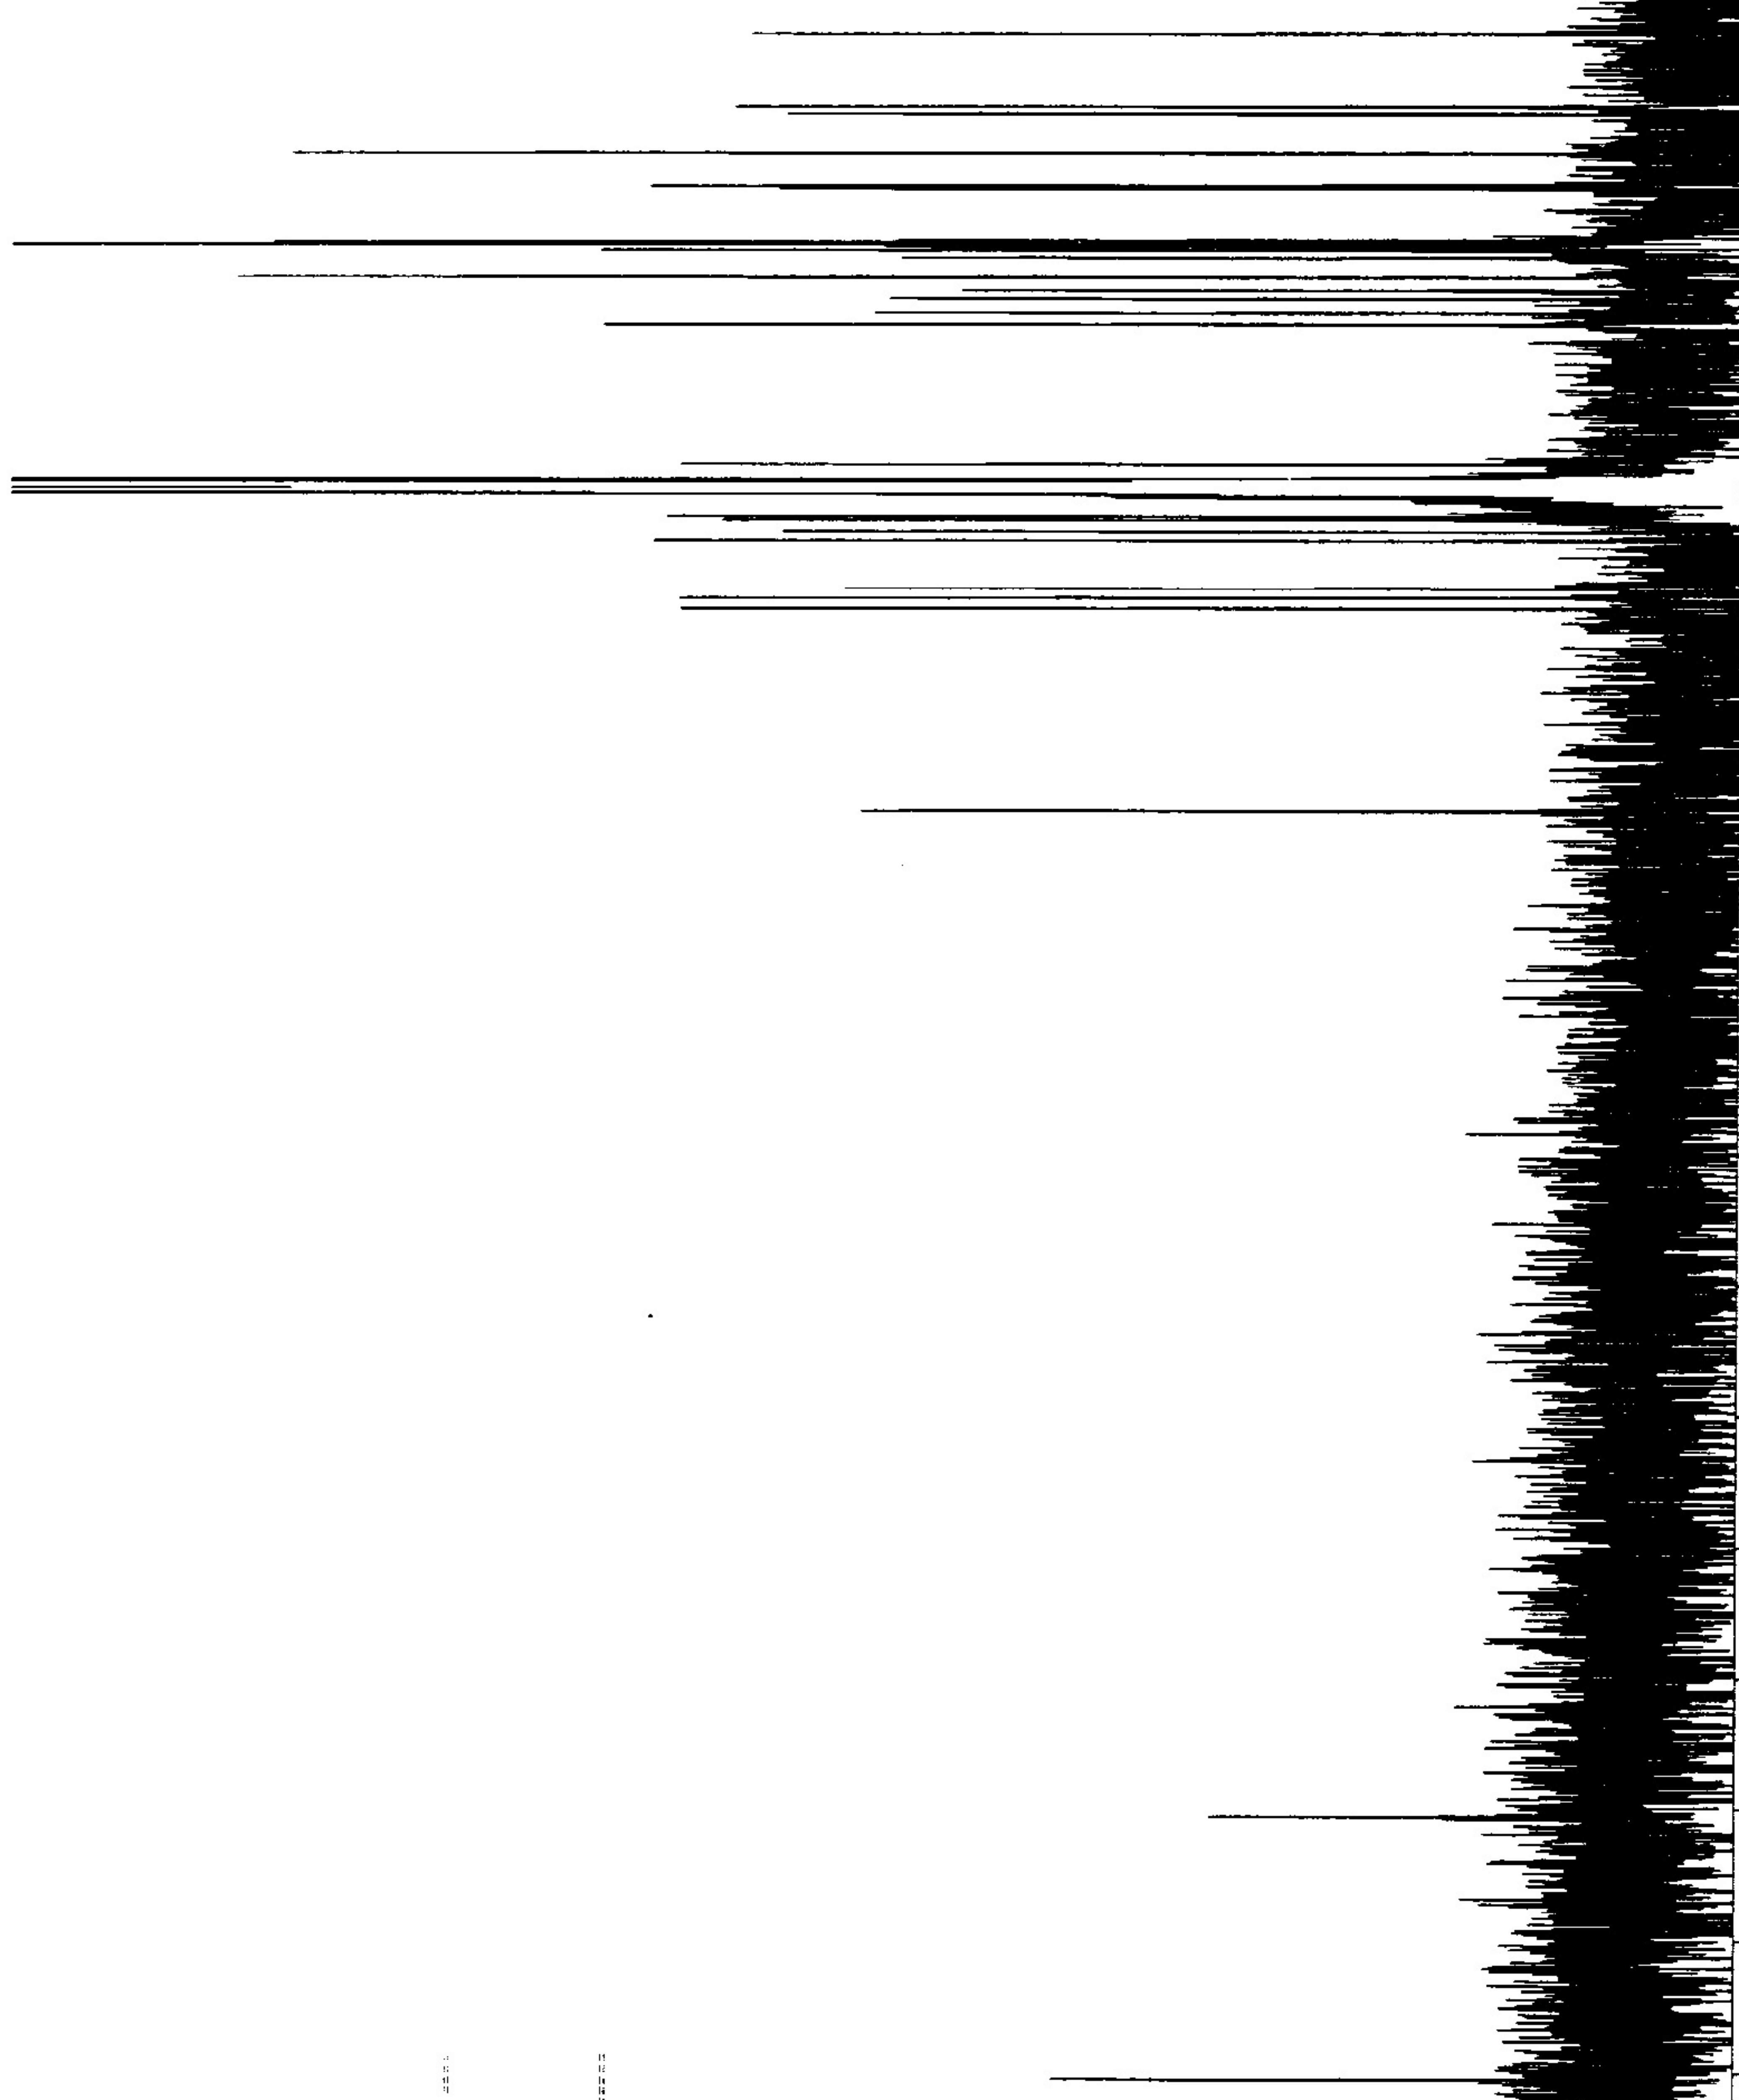

Current Data Parameters  
 USER fcoman  
 NAME fc-v-092  
 EXPNO 1  
 PROCNO 1

F2 Acquisition Parameters

Date: 20000701  
 Time: 15.42  
 INSTRUM spect  
 PROBHD 5 mm broadband  
 PULPROG zg30  
 ID 32758  
 SOLVENT MeOH  
 NS 32  
 DS 0  
 SWH 6009.615 Hz  
 FIDRES 0.183399 Hz  
 AQ 2.7263477 sec  
 RG 1290.2  
 OW 83.200 usec  
 OF 6.00 usec  
 TE 300.0 K  
 D1 1.00000000 sec

----- CHANNEL f1 -----

NUC1 1H  
 P1 4.00 usec  
 PL1 0.00 dB  
 SF01 500.1323506 MHz

F2 - Processing parameters

SI 32768  
 SF 500.1300159 MHz  
 WDW EM  
 SSB 0  
 LB 0.30 Hz  
 GB 0  
 PC 1.00

1D NMR plot parameters

CX 14.75 cm  
 F1P 10 000 ppm  
 F1 5001.30 Hz  
 F2P -0.500 ppm  
 F2 -250.07 Hz  
 PPMCM 0.71186 ppm/cm  
 HZCM 355.02475 Hz/cm

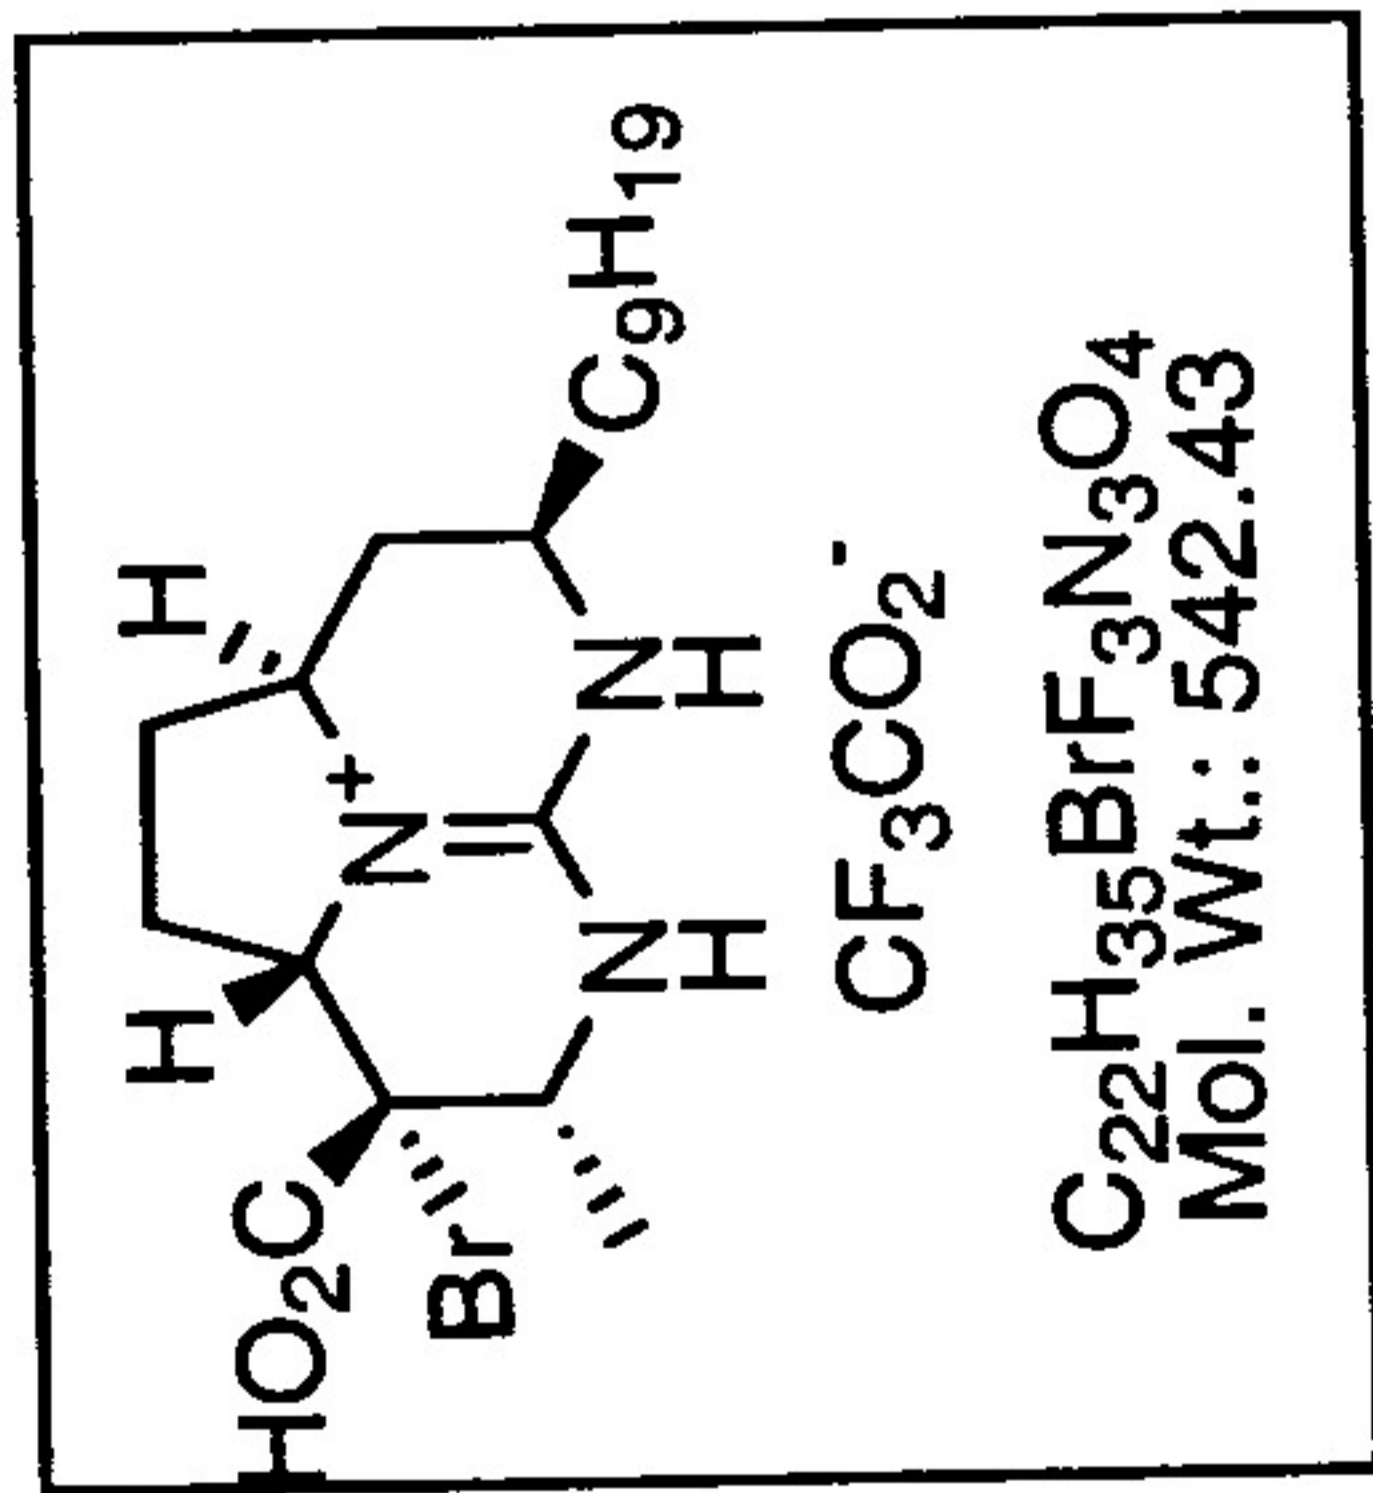

S103

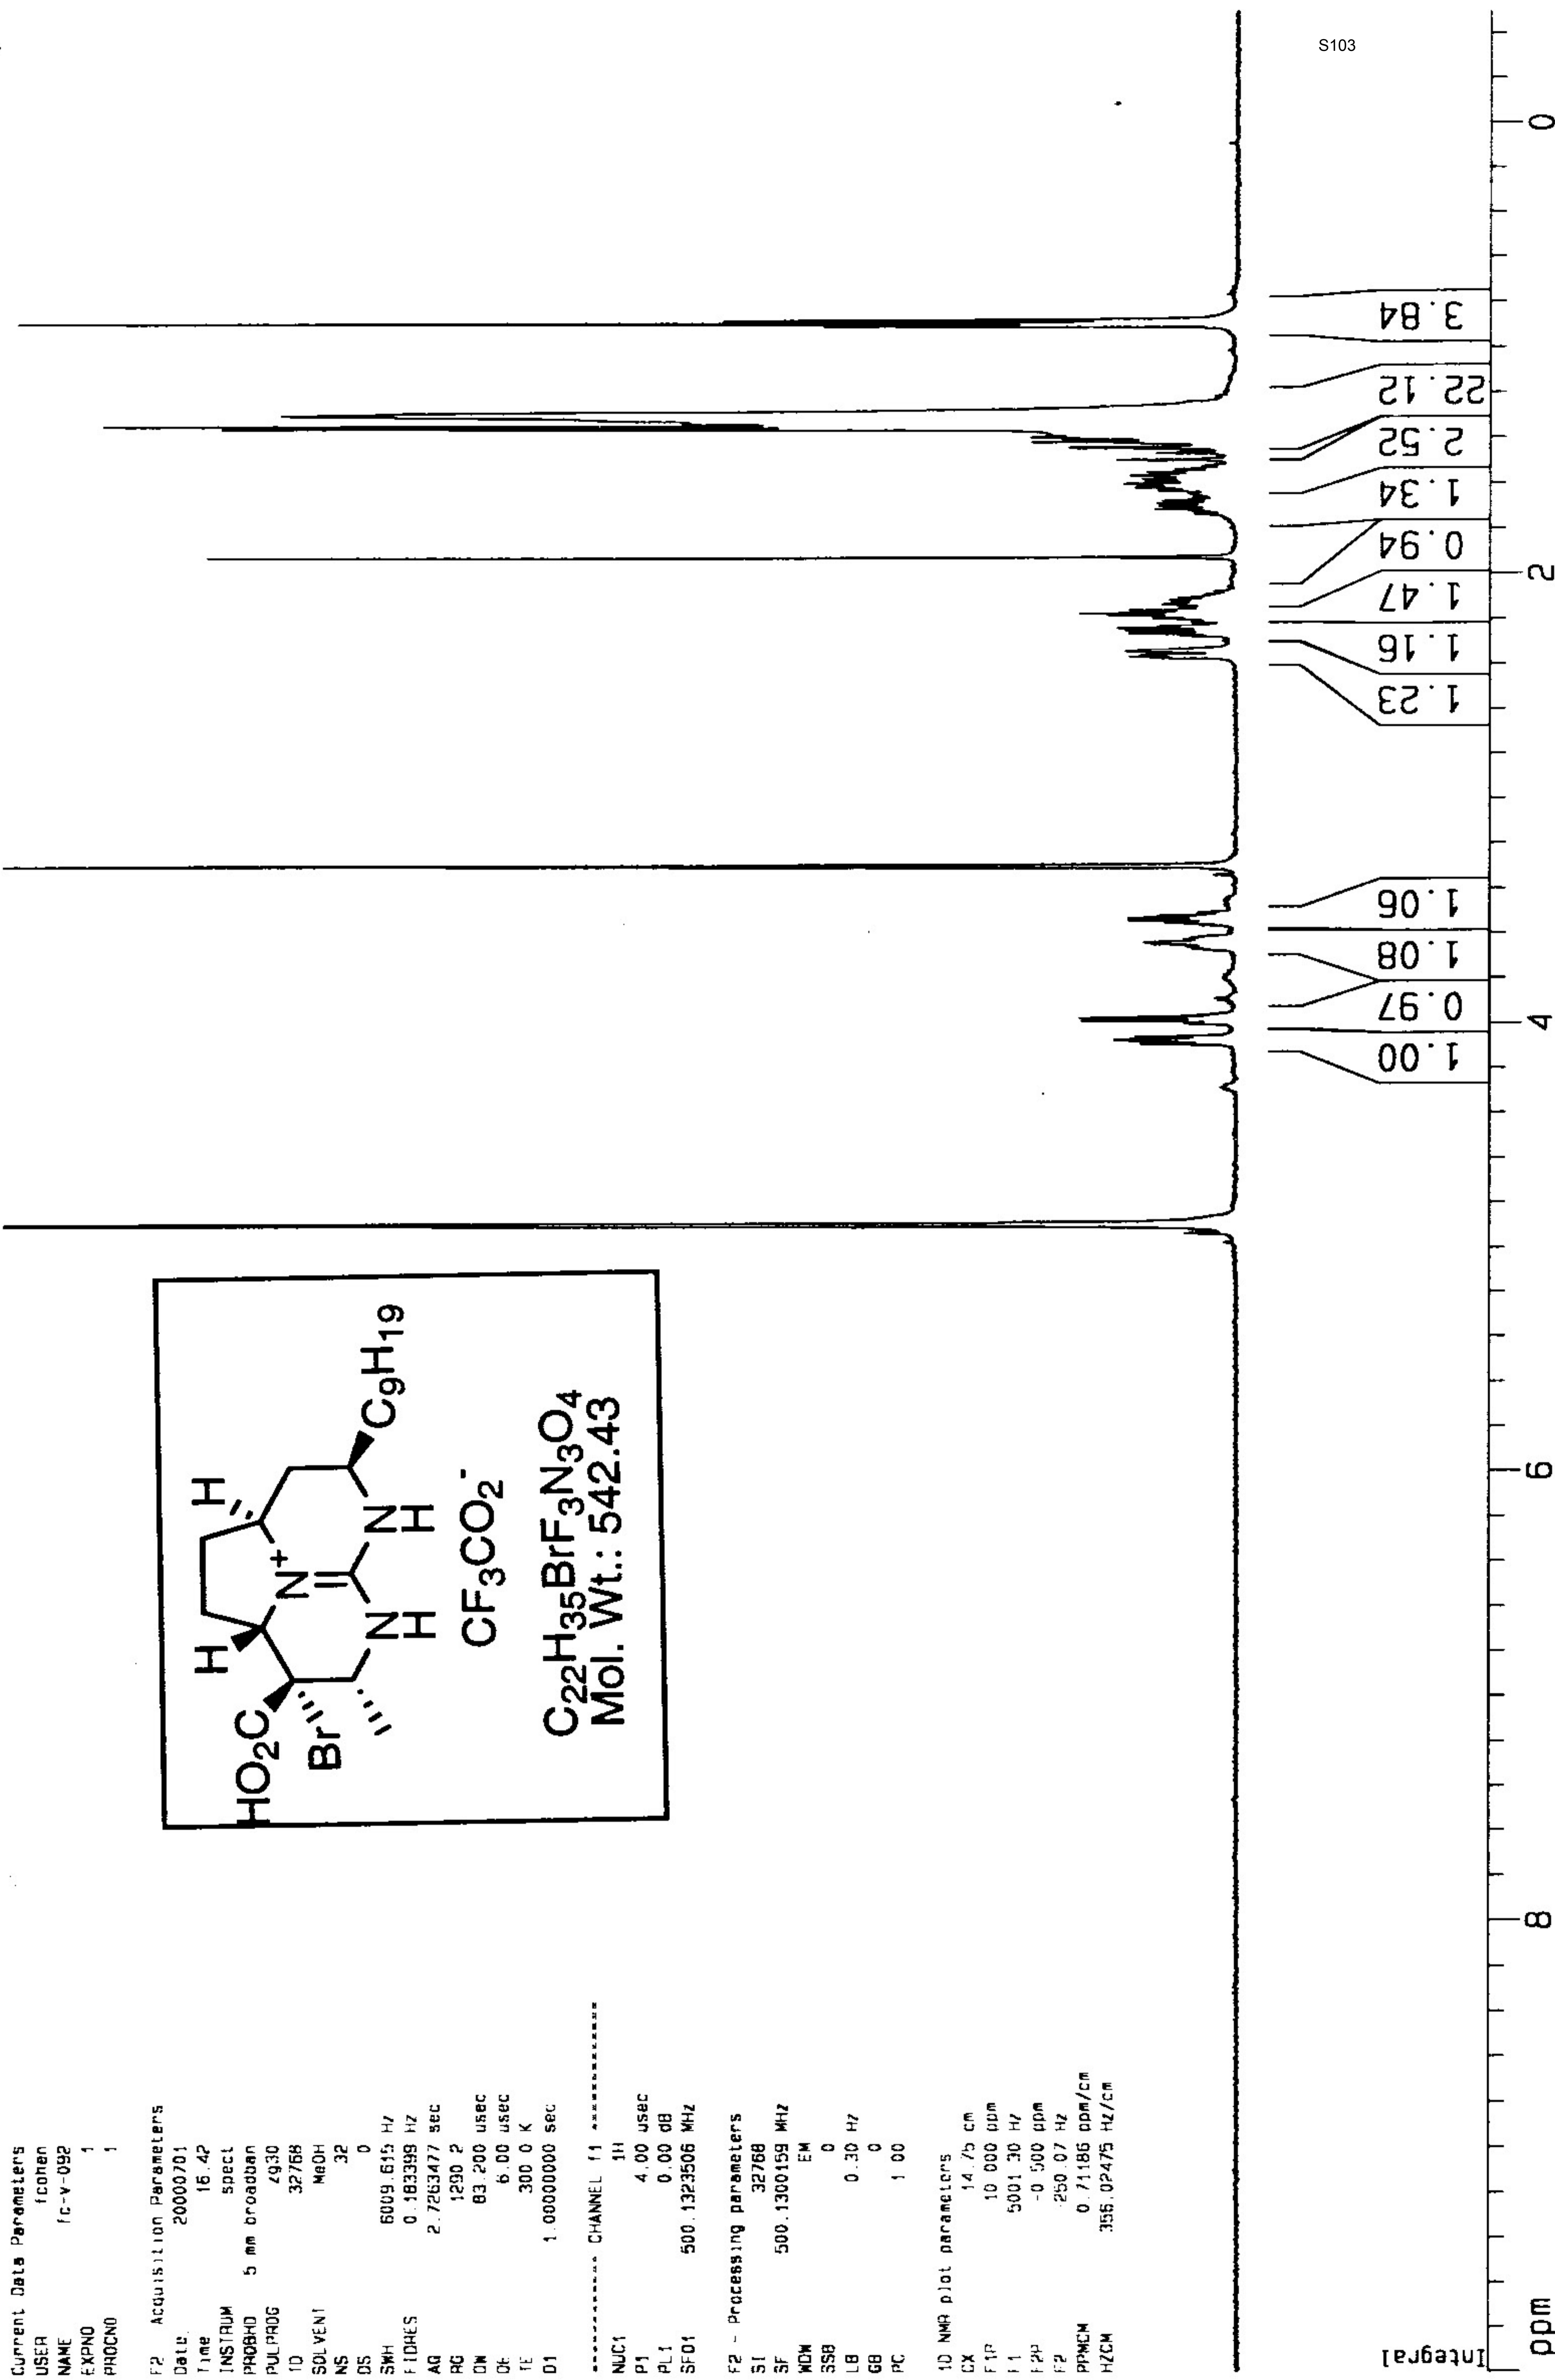

Current Data Parameters  
 USER fcohen  
 NAME fc-v-095  
 EXPNO 4  
 PROCNO 1

F2 - Acquisition Parameters

Date\_ 20000810  
 Time 7.02  
 INSTRUM spect  
 PROBHD 5 mm broadband  
 PULPROG zguc  
 TD 32768  
 SOLVENT CDC13  
 NS 9828  
 DS 0  
 SMH 31446.541 Hz  
 FIDRES 0.959672 Hz  
 AQ 0.5210612 sec  
 RG 4096  
 DW 15.900 usec  
 DE 4.50 usec  
 TE 300.0 K  
 D1 2.00000000 sec  
 D11 0.03000000 sec

\*\*\*\*\* CHANNEL f1 \*\*\*\*\*

NUC1 13C  
 P1 10.00 usec  
 PL1 0.00 dB  
 SFO1 125.7935759 MHz

\*\*\*\*\* CHANNEL f2 \*\*\*\*\*

CPDPRG2 waltz16  
 NUC2 1H  
 PCPD2 80.00 usec  
 PL2 120.00 dB  
 PL12 15.00 dB  
 SFO2 500.225010 MHz

F2 processing parameters

SI 32768  
 SF 125.7802459 MHz  
 NDM EM  
 SSB 0  
 LB 1.00 Hz  
 GB 0  
 PC 1.00

1D NMR plot parameters

CX 14.75 cm  
 F1P 200.000 ppm  
 F1 25156.05 Hz  
 F2P 0.000 ppm  
 F2 0.00 Hz  
 PPMCM 13.55932 ppm/cm  
 HZCM 1705.49500 Hz/cm

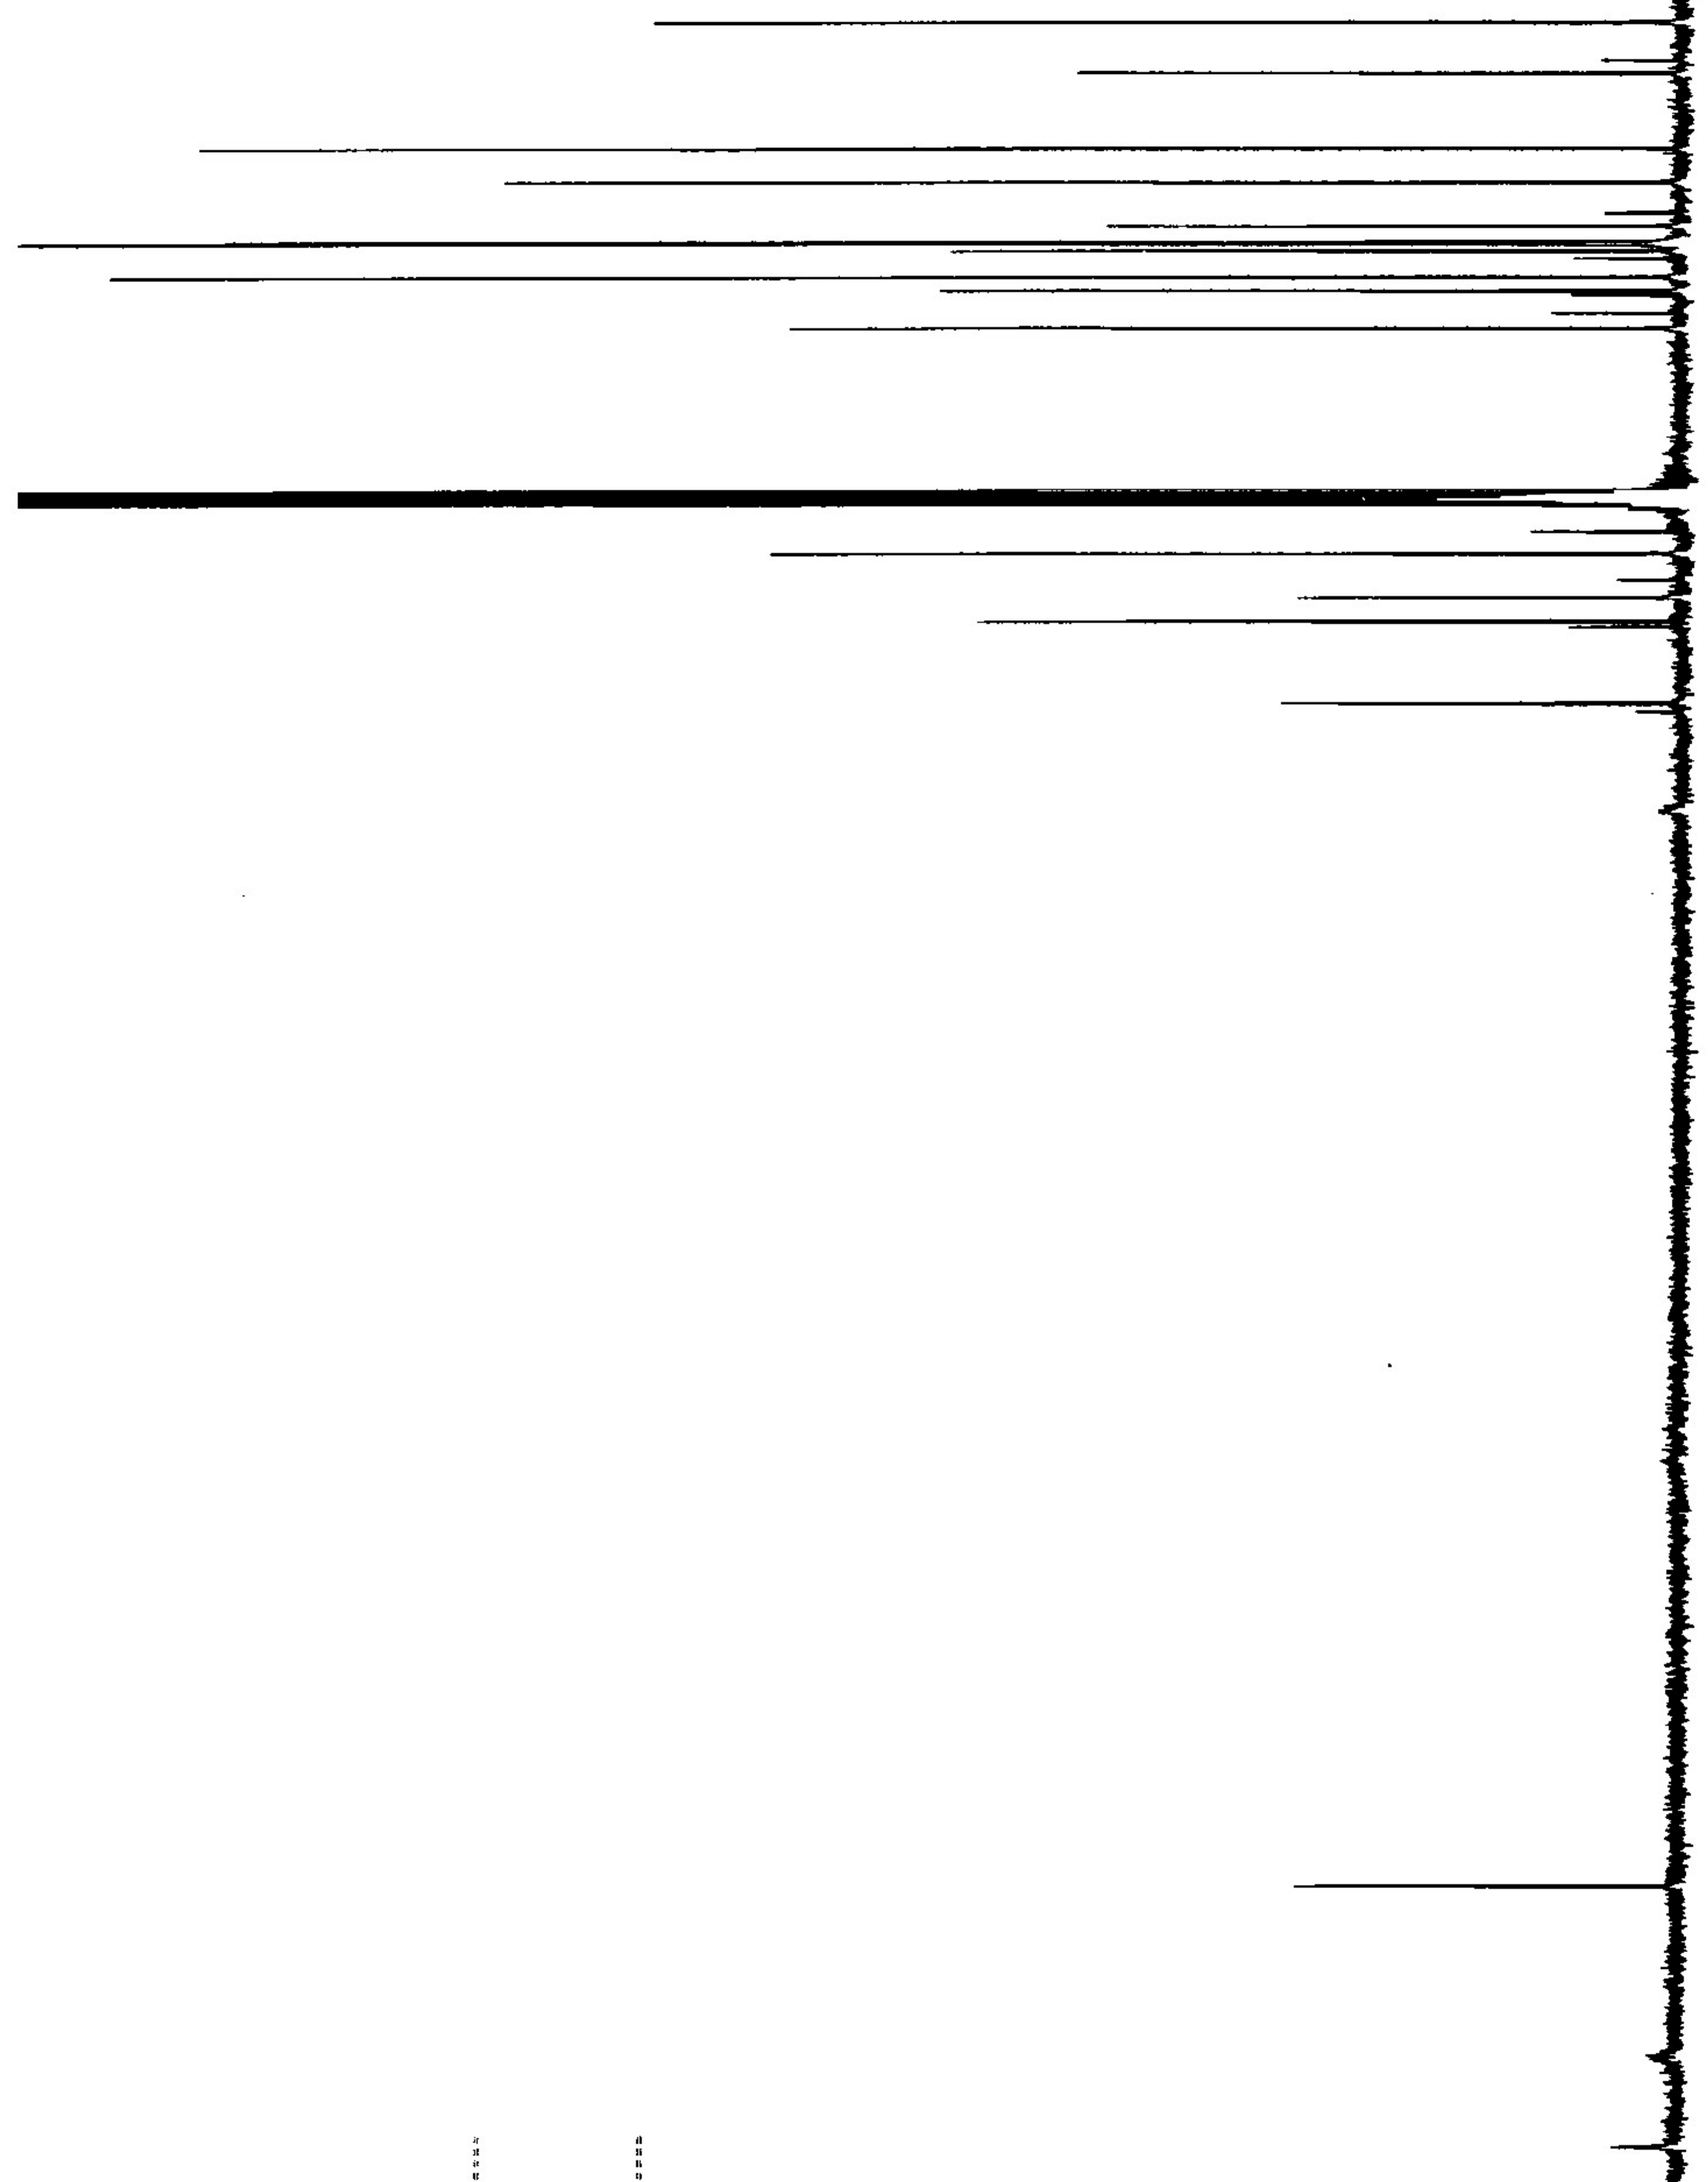

ppm

150

100

50

Current Data Parameters  
 USER fcohen  
 NAME 1c-v-194a  
 EXPNO 1  
 PROCNO 1

F2 - Acquisition Parameter  
 Date\_ 20001119  
 Time 0.07  
 INSTRUM omega500  
 PROBHD 5 mm broadband  
 PULPROG zg30  
 TD 65536  
 SOLVENT CDCl3  
 NS 32  
 DS 2  
 SWH 8012.820 Hz  
 FLORES 0.122266 Hz  
 AQ 4.0894966 sec  
 RG 256  
 DW 62.400 us  
 DE 6.00 us  
 TE 300.0 K  
 O1 0.10000000 sec

----- CHANNEL f1 -----  
 NUC1 1H  
 P1 14.00 usec  
 PL1 0.00 dB  
 SF01 500.2235015 MHz  
 F2 Processing parameters  
 SI 65536  
 SF 500.2200189 MHz  
 WDM EM  
 SSB 0  
 LB 0.30 Hz  
 GB 0  
 HC 1.00

1D NMR plot parameters  
 CX 14.75 cm  
 F1P 10.000 ppm  
 F1 5002.20 Hz  
 F2P -0.500 ppm  
 F2 -250.11 Hz  
 PPMCM 0.71186 ppm/cm  
 HZCM 356.08884 Hz/cm

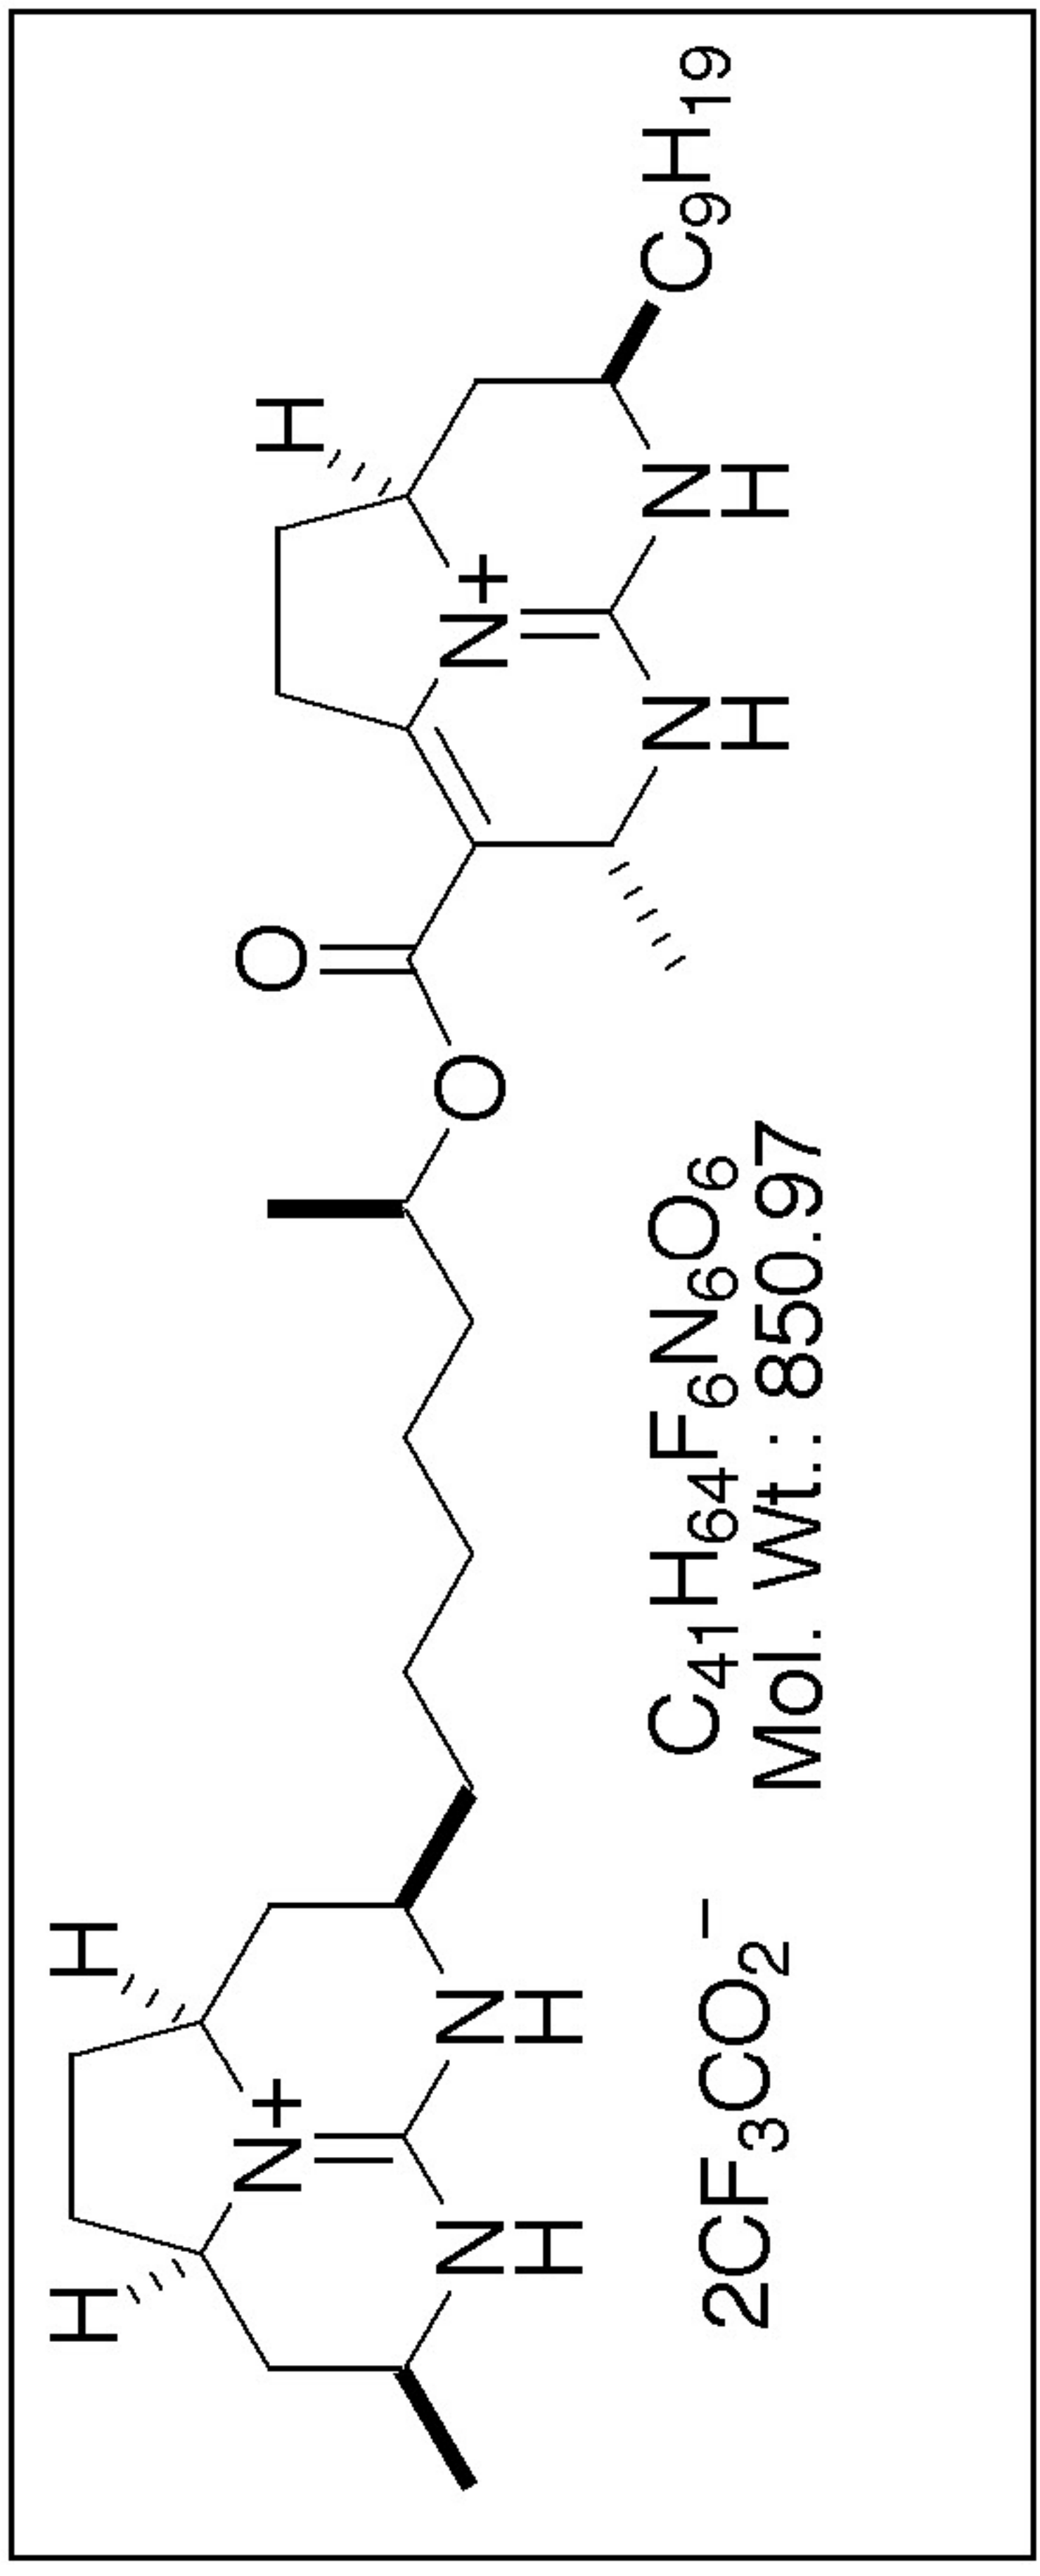

C<sub>41</sub>H<sub>64</sub>F<sub>6</sub>N<sub>6</sub>O<sub>6</sub>  
 Mol. Wt.: 850.97  
 2CF<sub>3</sub>CO<sub>2</sub><sup>-</sup>

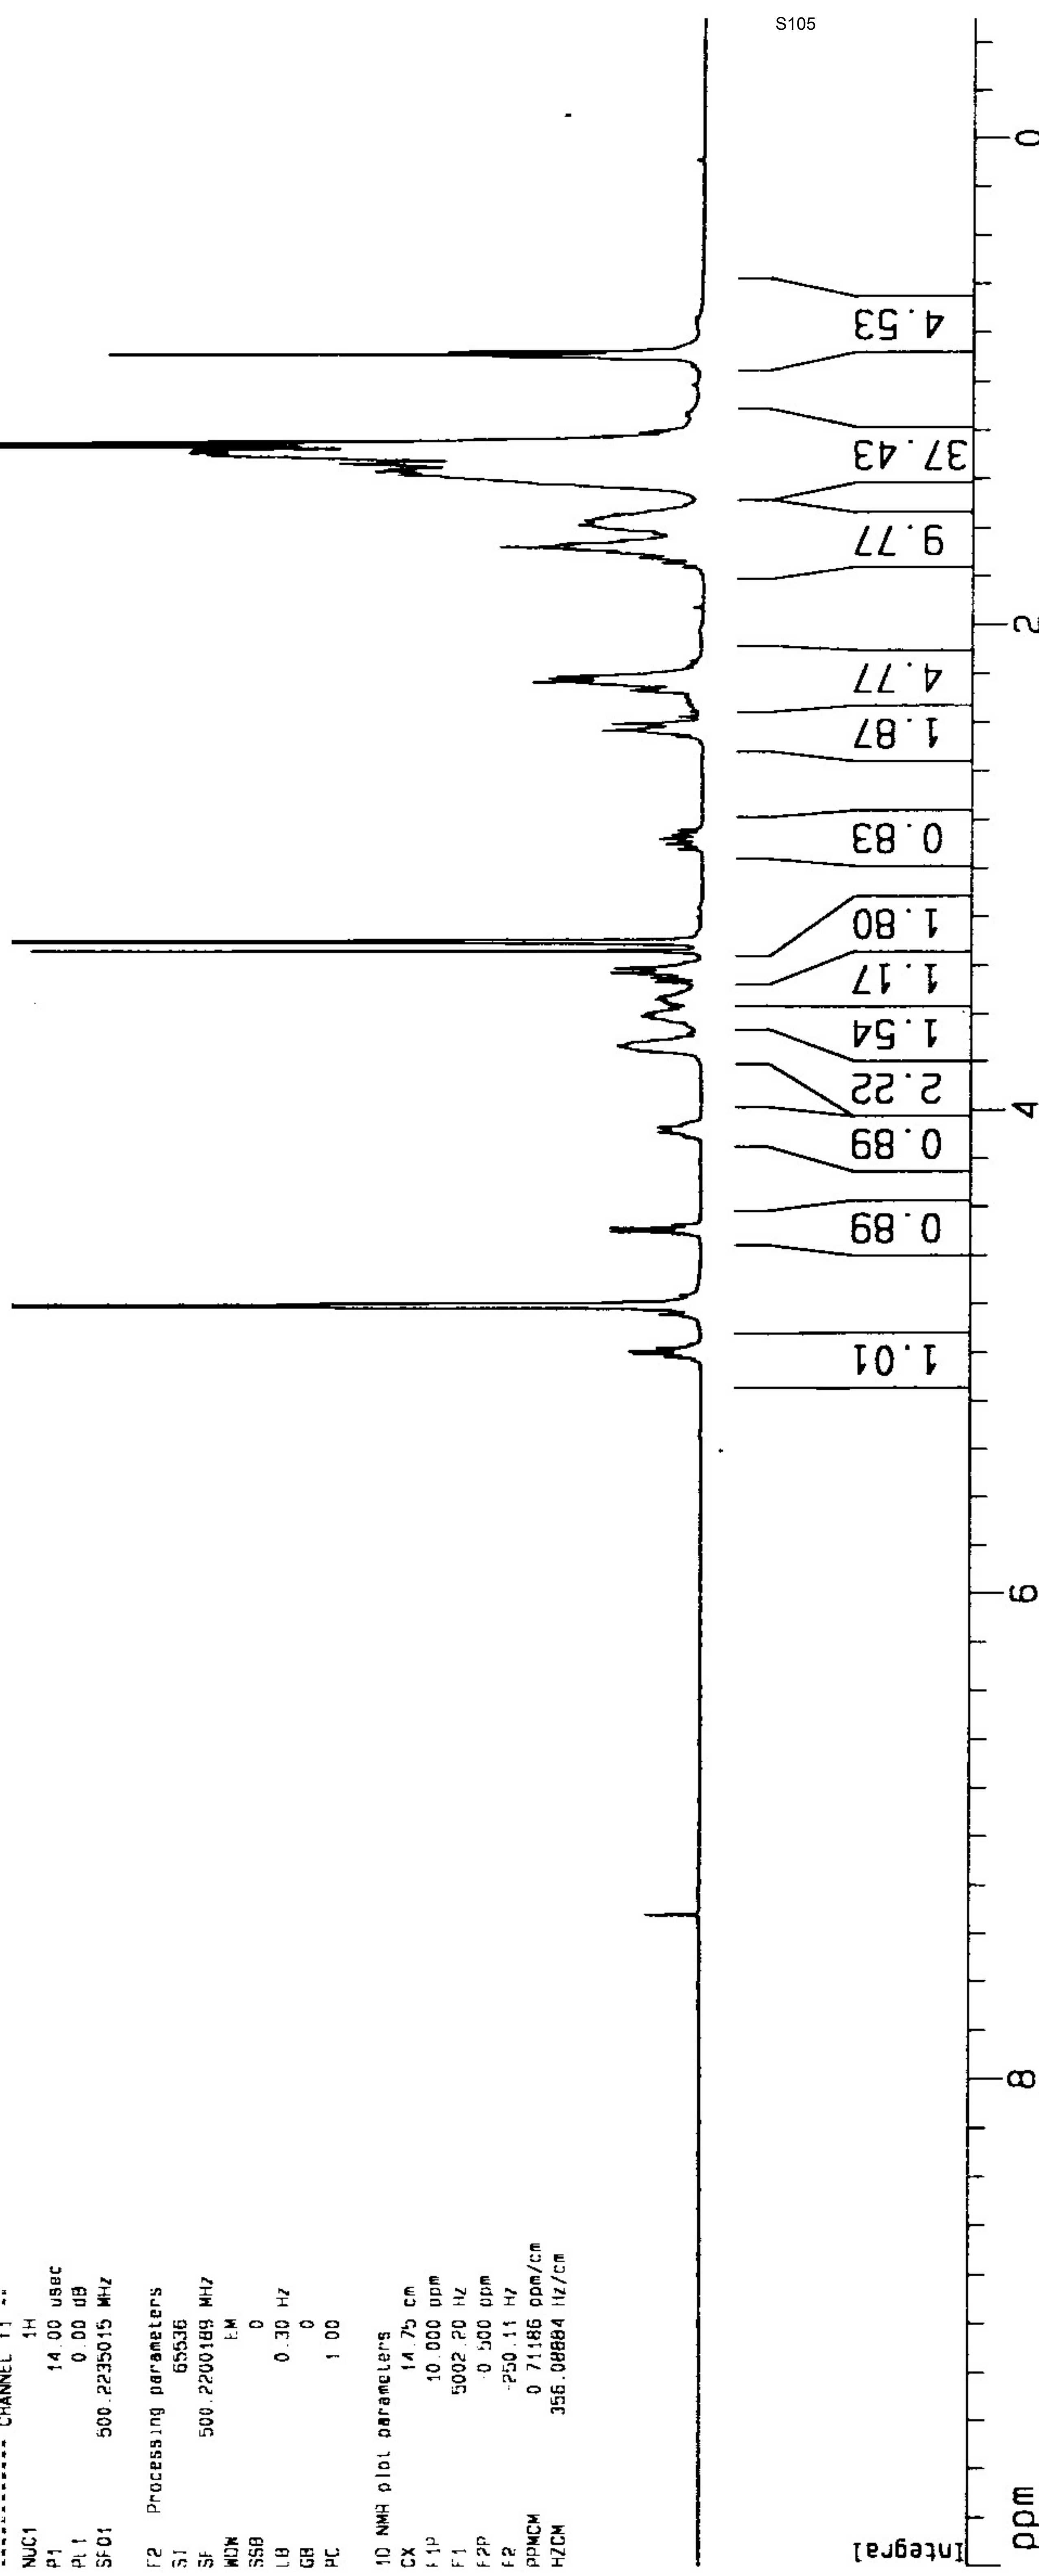

Current Data Parameters  
USER iconien  
NAME fc.v.194a  
EXPNO 2  
PROCNO 1

F2 - Acquisition Parameters  
Date\_ 20001119  
Time 7.47  
INSTRUM omegas500  
PROBHD 5 mm broadband  
PULPROG zgpg30  
TD 65536  
SOLVENTI CDCl3  
NS 20571  
DS 4  
SWH 30303.031 Hz  
FIDRES 0.462388 Hz  
AQ 1.0813940 sec  
RG 5192.6  
DM 15.500 uSRR  
DE 4.50 uSRR  
TE 300.0 K  
D1 0.25000000 sec  
D11 0.03000000 sec

\*\*\*\*\* CHANNEL f1 \*\*\*\*\*  
NUC1 13C  
P1 7.00 usec  
PL1 0.00 dB  
SFO1 125.7942048 MHz  
\*\*\*\*\* CHANNEL f2 \*\*\*\*\*  
CPROG2 waltz16  
NUC2 1H  
PCPD2 80.00 usec  
PL2 120.00 dB  
PL12 15.00 dB  
SFO2 500.2230013 MHz

F2 - Processing parameters  
SI 65536  
SF 125.7802439 MHz  
WDW FM  
SSB 0  
LR 1.00 Hz  
GB 0  
PC 1.00  
10 NMR plot parameters  
CX 14.75 cm  
F1P 200.000 ppm  
F1 25156.05 Hz  
F2P 0.000 ppm  
F2 0.00 Hz  
PPMCM 13.55932 ppm/cm  
HZCM 1705.49500 Hz/cm

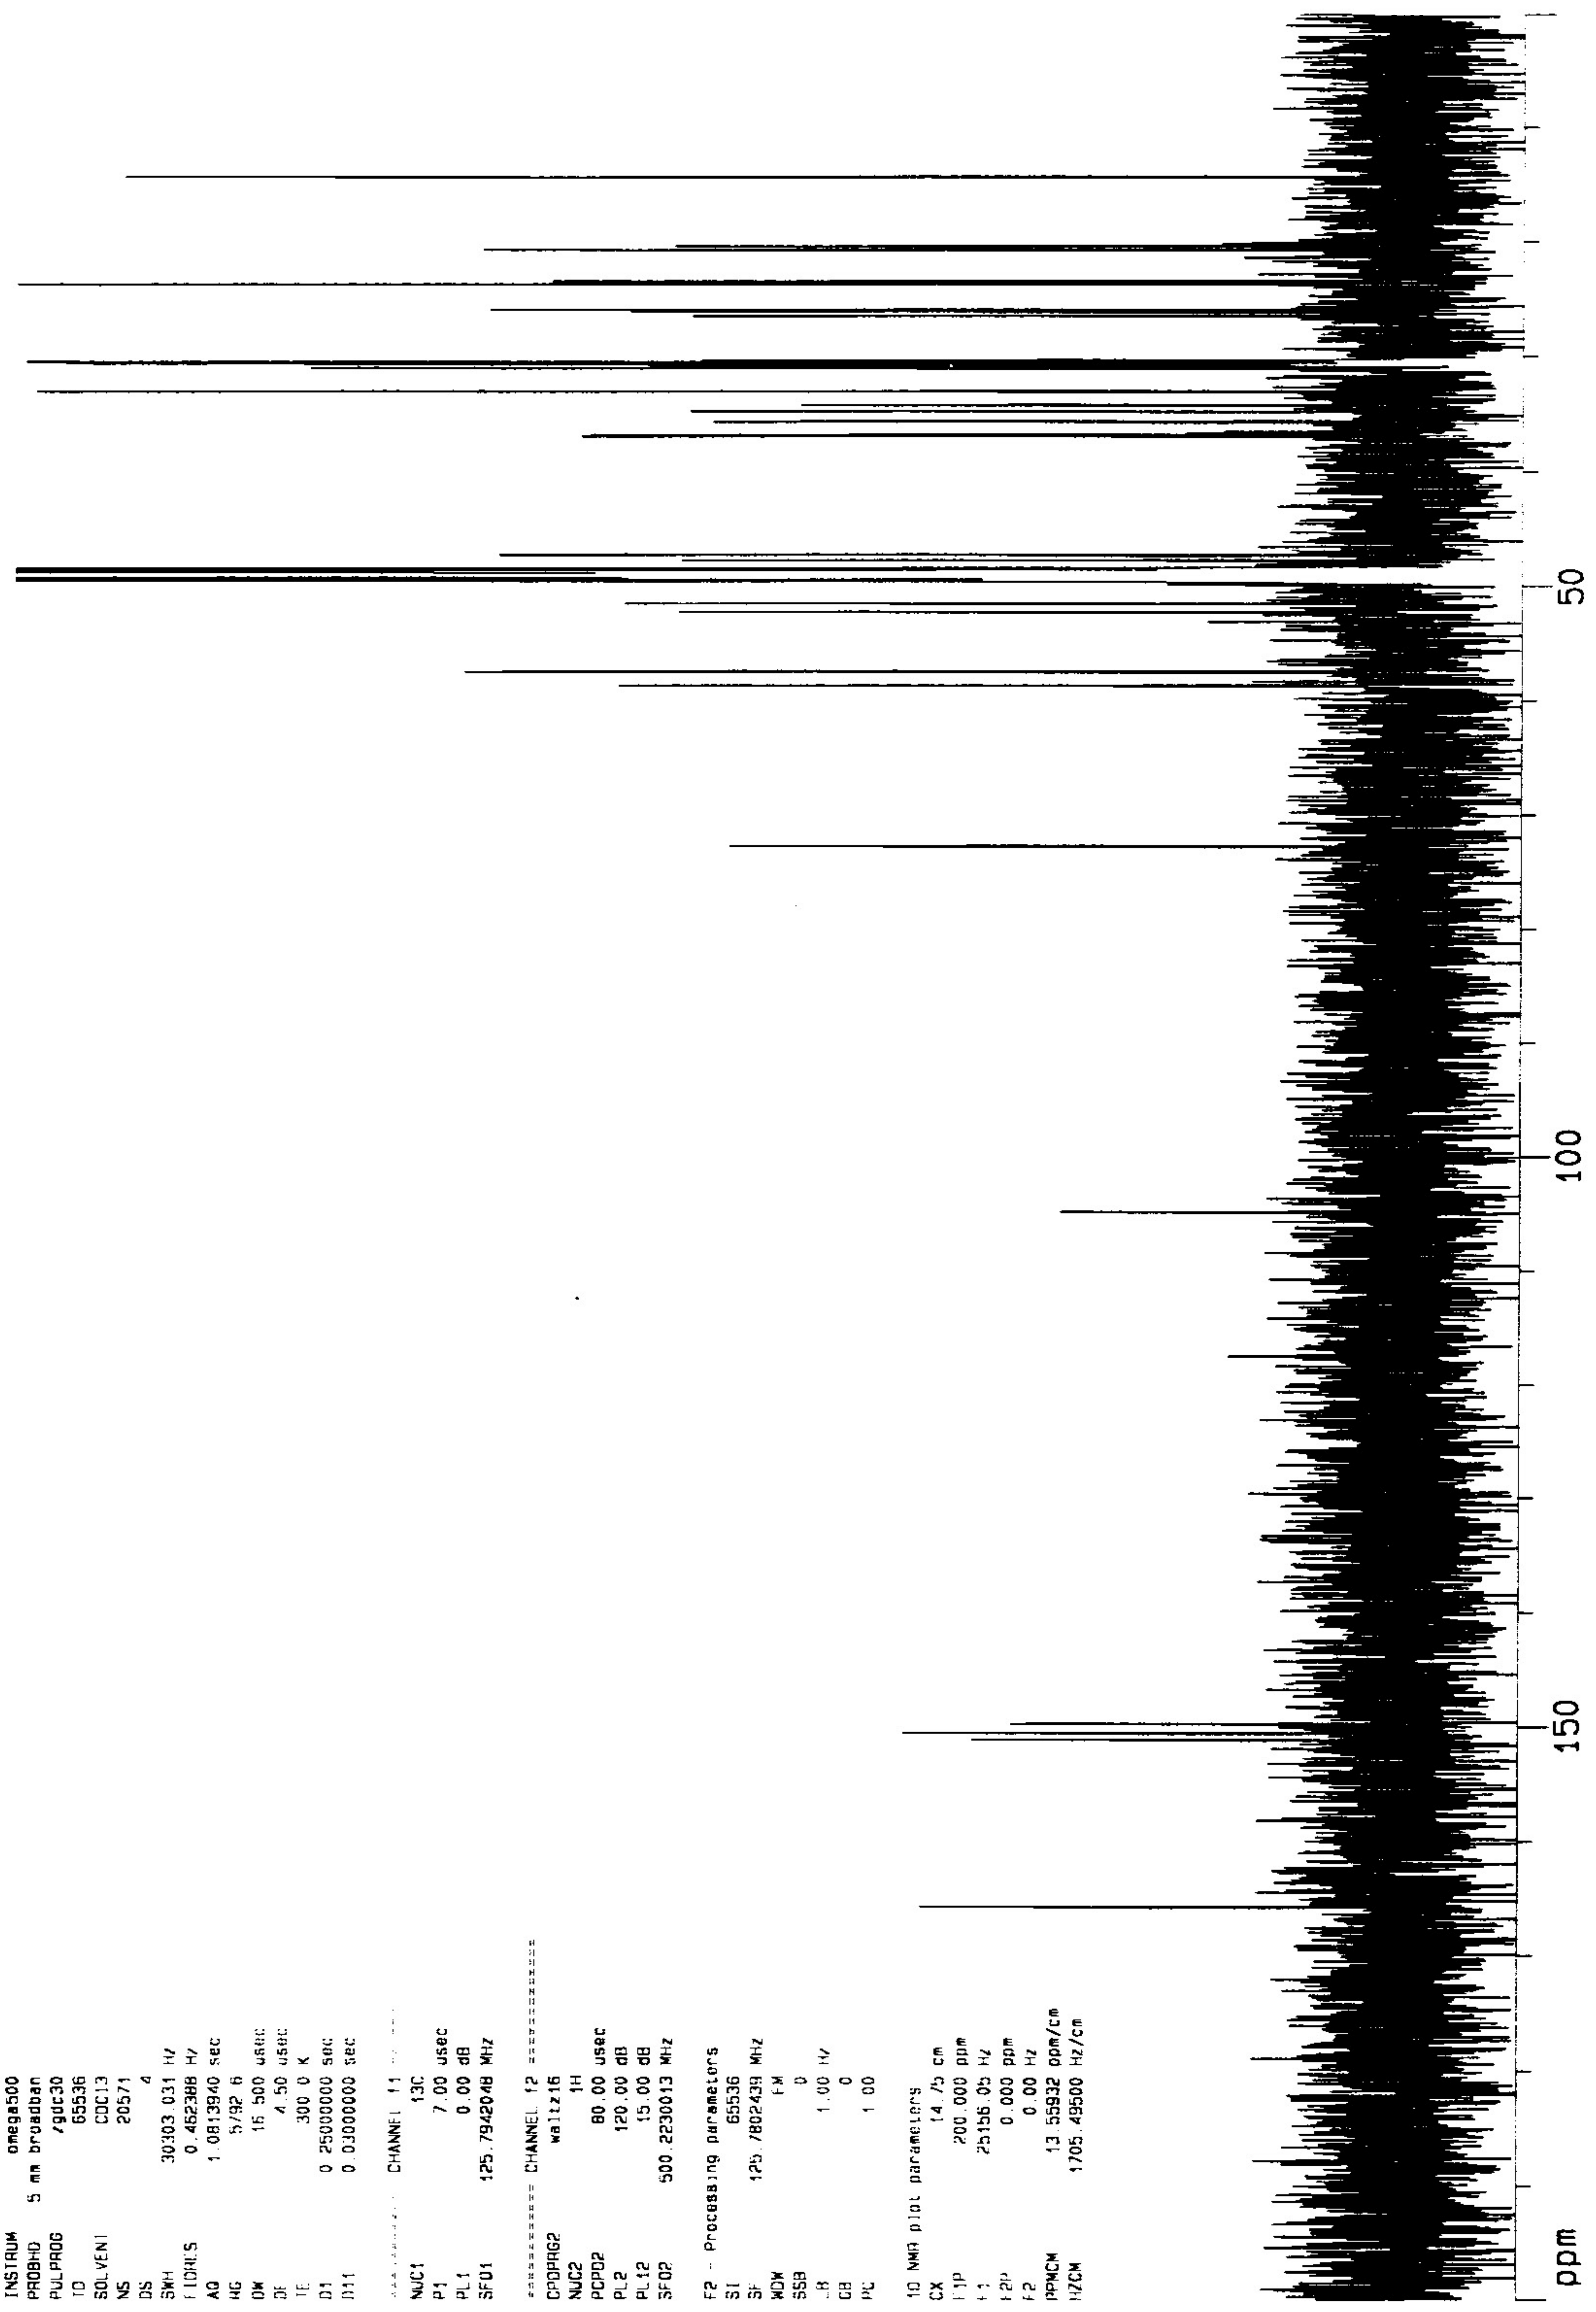

Current Data Parameters  
USER fcohen  
NAME fc-v-194  
EXPNO 1  
PROCNO 1

F2 - Acquisition Parameters  
Date\_ 20001112  
Time 21.19  
INSTRUM gn500  
PROBHD 5 mm broadband  
PULPROG zg30  
TD 65536  
SOLVENT MeOH  
NS 24  
DS 2  
SWH 8012.820 Hz  
FIDRES 0.122266 Hz  
AQ 4.0894966 sec  
RG 362  
DQ 62.400 usec  
DE 6.00 usec  
TE 300.0 K  
O1 0.1000000 sec

\*\*\*\*\* CHANNEL f1 \*\*\*\*\*  
NUC1 1H  
P1 12.00 usec  
PL1 -3.00 dB  
SFO1 500.1335009 MHz

F2 - Processing parameters  
SI 32768  
SF 500.1300160 MHz  
WDW EM  
SSB 0  
LB 0.30 Hz  
GB 0  
PC 4.00

1D NMR plot parameters  
CX 14.75 cm  
F1P 10.000 ppm  
F1 5001.30 Hz  
F2P -0.500 ppm  
F2 -250.07 Hz  
PPMCM 0.71186 ppm/cm  
HZCM 356.02475 Hz/cm

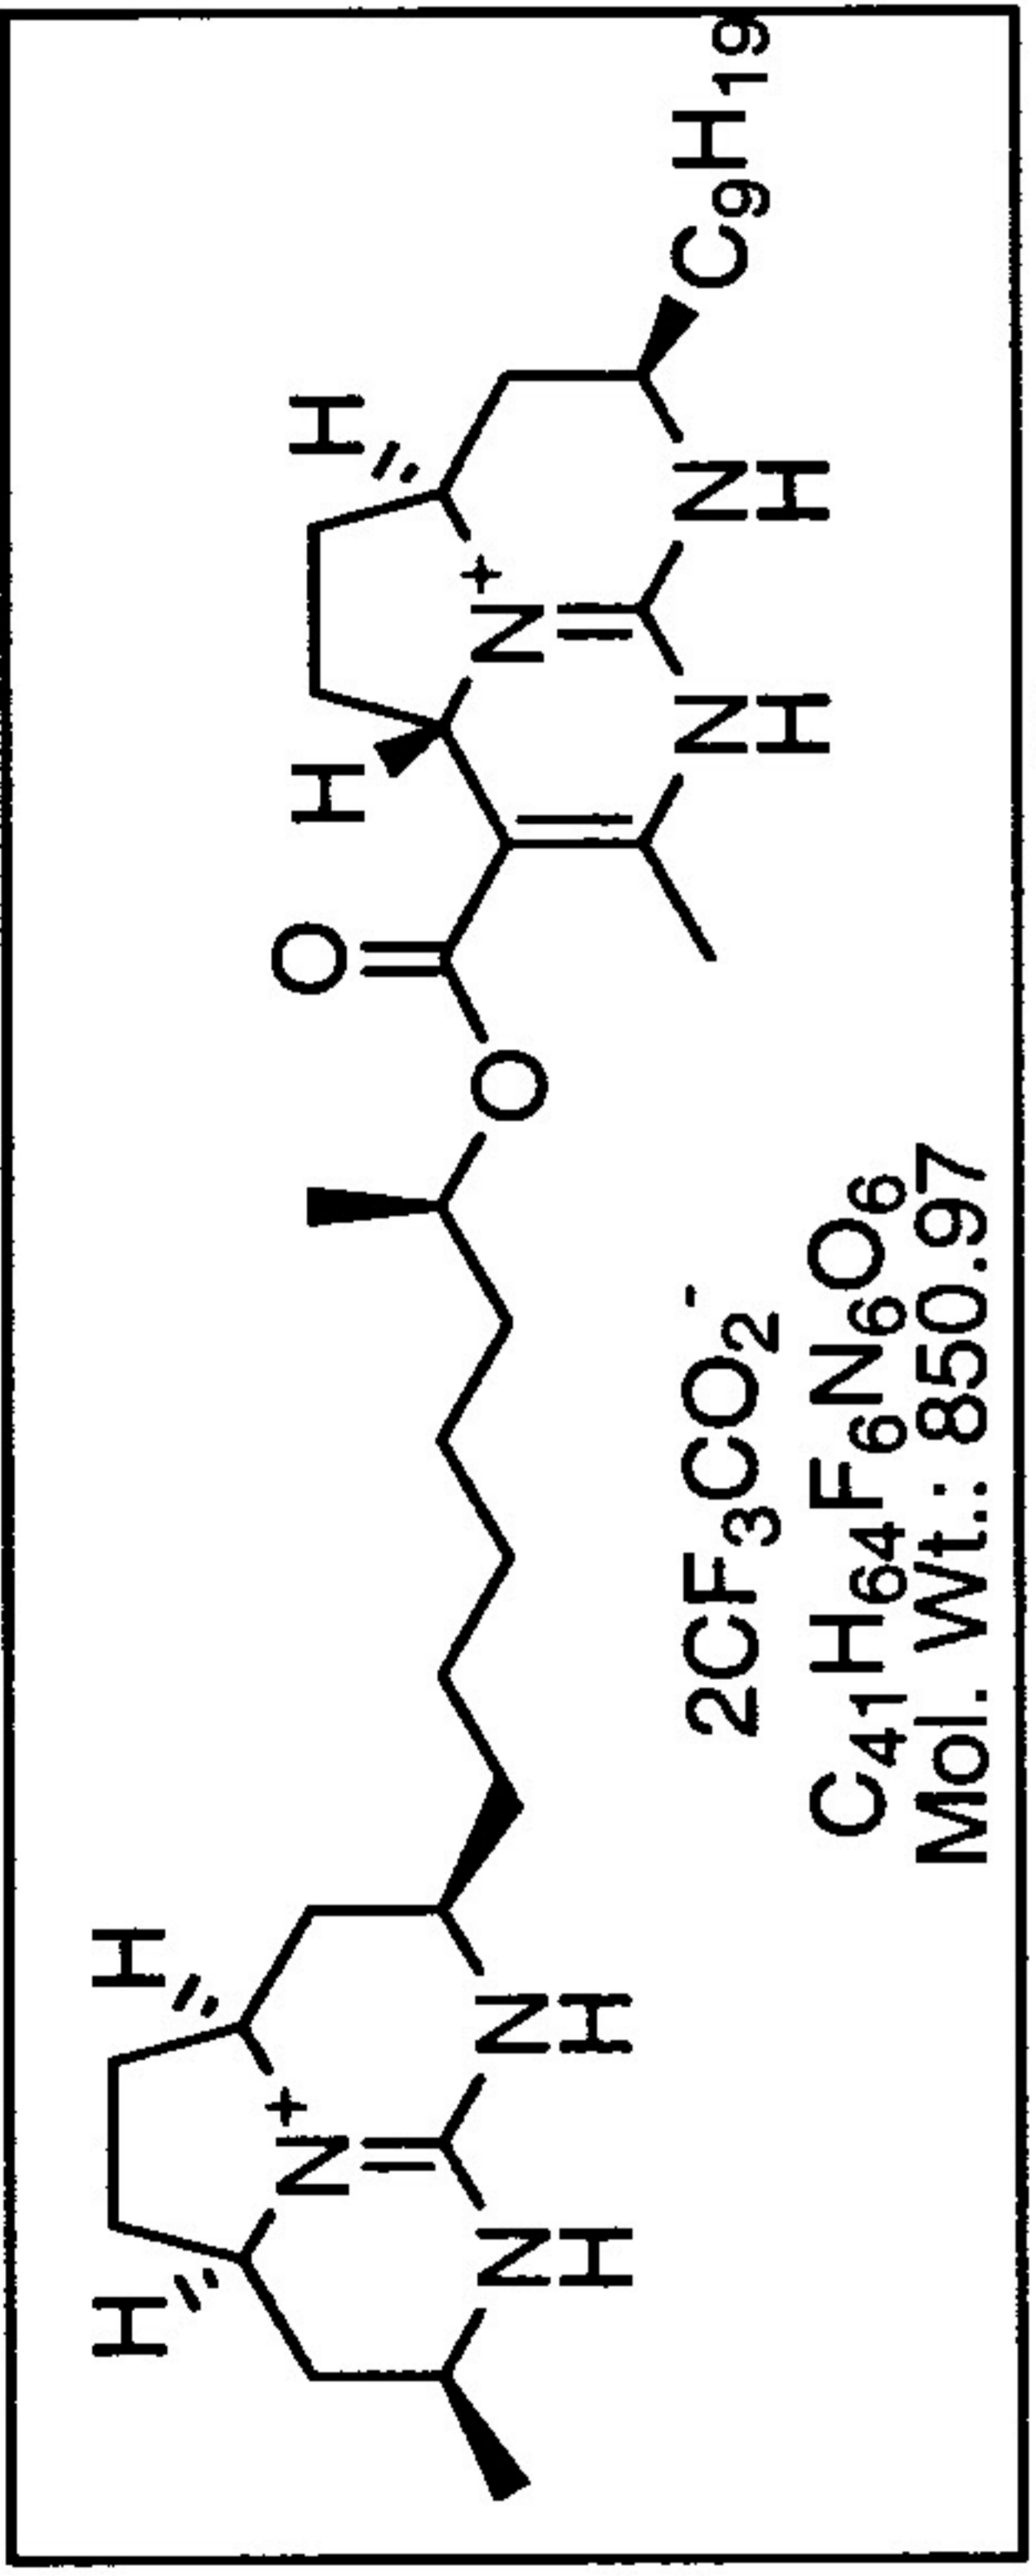

2CF<sub>3</sub>CO<sub>2</sub><sup>-</sup>  
C<sub>41</sub>H<sub>64</sub>F<sub>6</sub>N<sub>6</sub>O<sub>6</sub>  
Mol. Wt.: 850.97

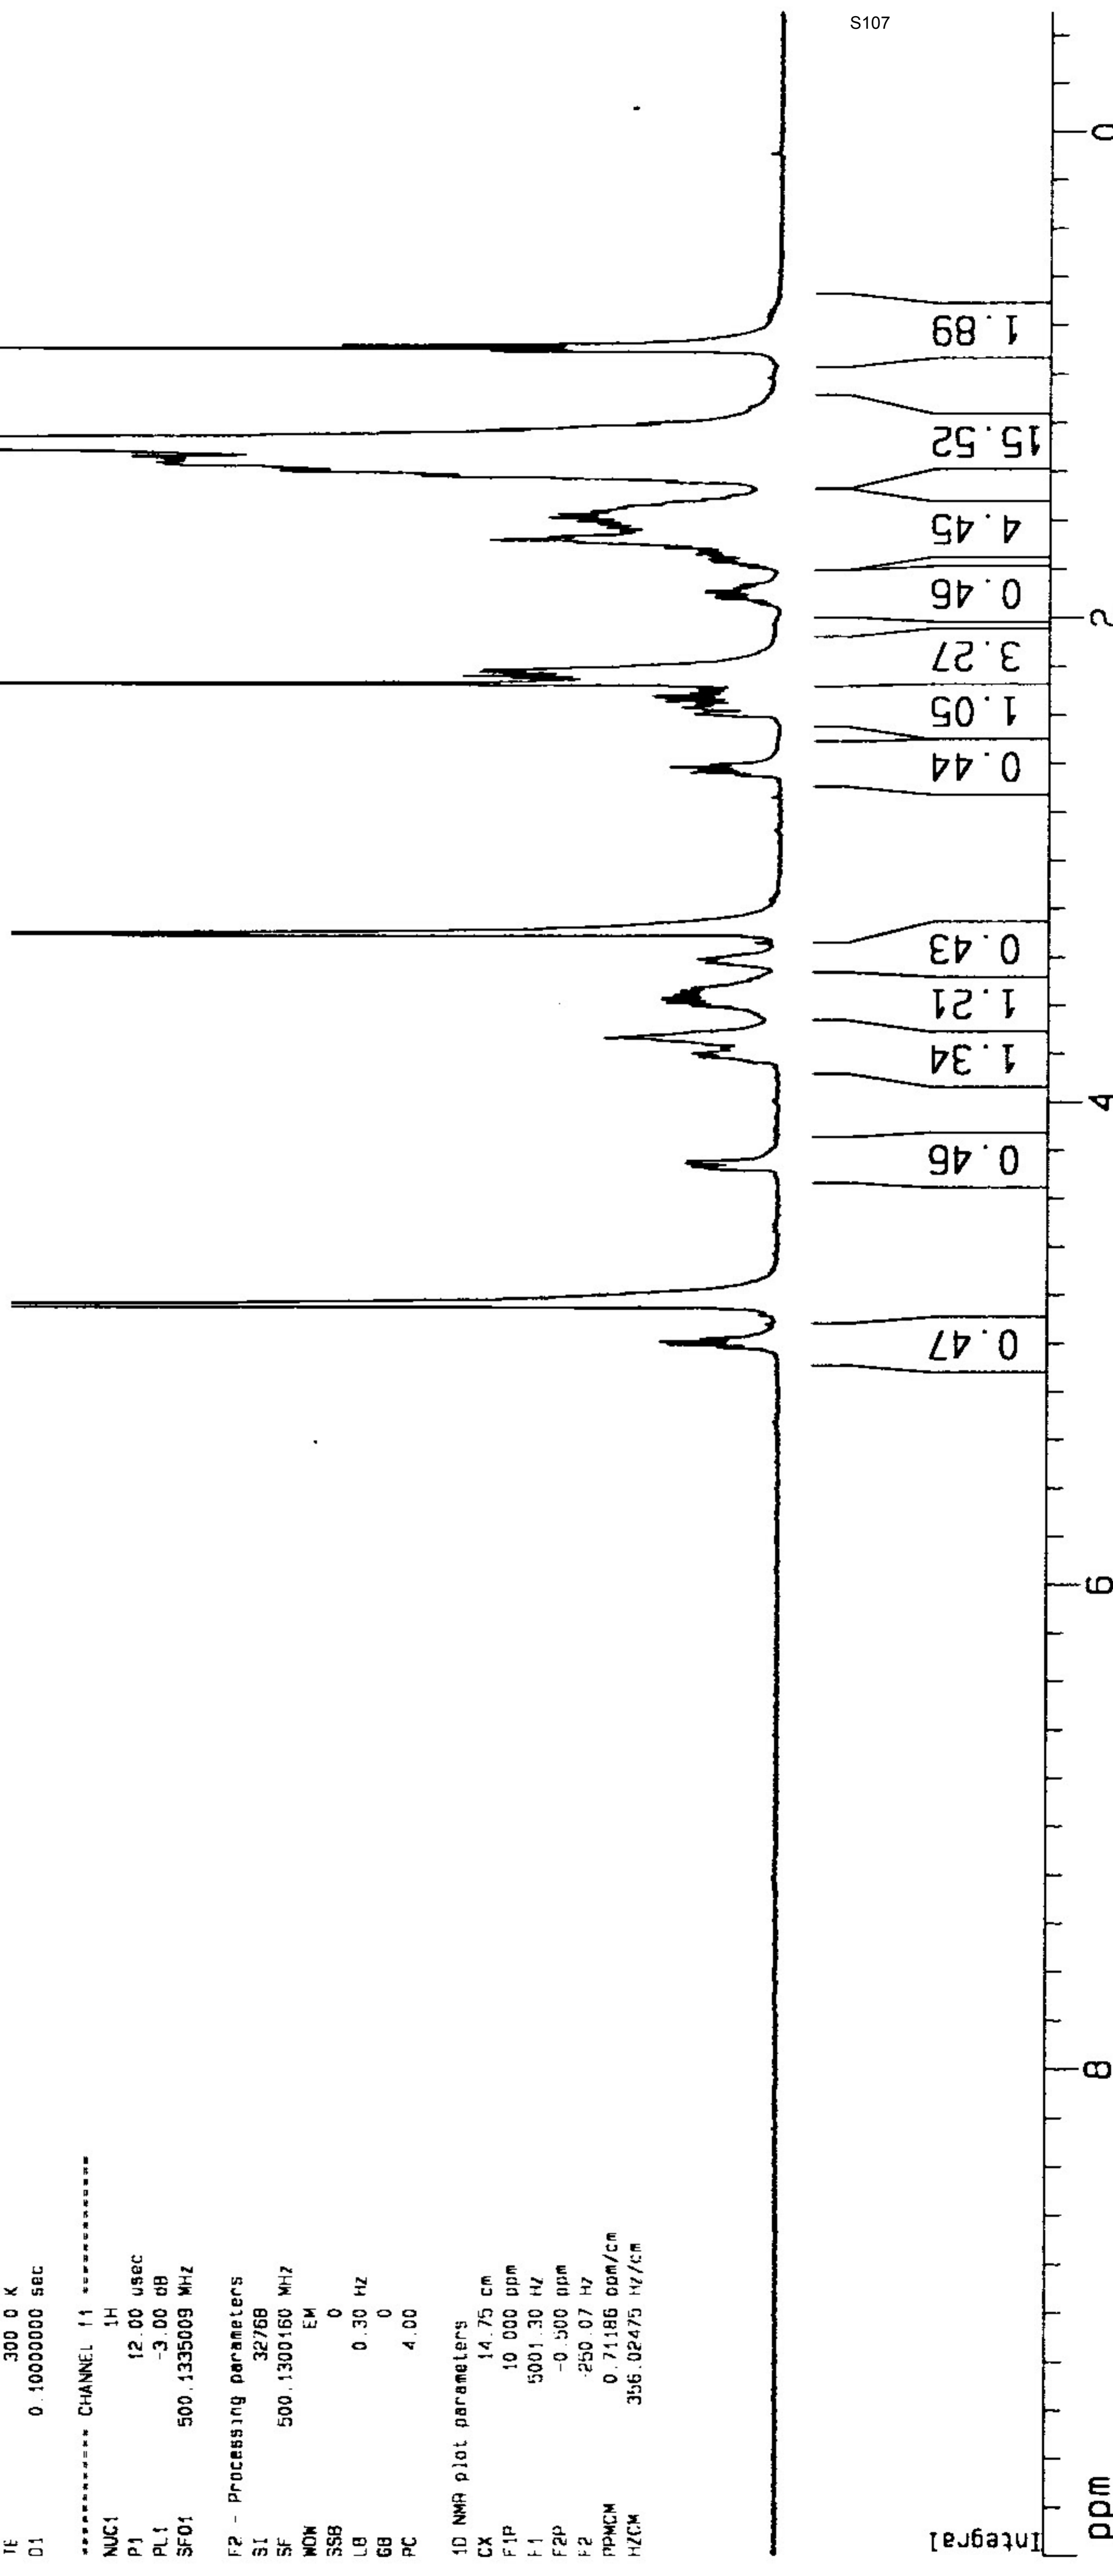

| Chemical Shift (ppm) | Integration |
|----------------------|-------------|
| 0.47                 | 0.47        |
| 1.21                 | 1.21        |
| 1.34                 | 1.34        |
| 1.89                 | 1.89        |
| 3.27                 | 3.27        |
| 4.45                 | 4.45        |
| 15.52                | 15.52       |

Integral

Current Data Parameters  
USER fcohen  
NAME fc-v-19A  
EXPNO 2  
PROCNO 1

F2 - Acquisition Parameters

Date\_ 2000113  
Time 7.14  
INSTRUM gn500  
PROBHD 5 mm broadband  
PULPROG zgpg30  
TD 65536  
SOLVENT CGD6  
NS 24675  
DS 2  
SWH 30185.178 Hz  
FIDRES 0.460589 Hz  
AQ 1.0856159 sec  
RG 5160 5  
DM 16.564 usec  
DE 4.50 usec  
TE 300.0 K  
D1 0.25000000 sec  
D11 0.03000000 sec

CHANNEL F1  
NUC1 13C  
P1 6.25 usec  
PL1 0.00 dB  
SF01 125.7715724 MHz

CHANNEL F2  
CPDPRG2 waltz16  
NUC2 1H  
PCPD2 80.00 usec  
PL2 3.00 dB  
PL12 13.50 dB  
SF02 500.1340000 MHz

F2 - Processing parameters

SI 65536  
SF 125.7576429 MHz  
WDW FM  
SSB 0  
LB 1.00 Hz  
GB 0  
PC 2.00

1D NMR plot parameters

CX 14.75 cm  
F1P 200.000 ppm  
F1 25151.53 Hz  
F2P 0.000 ppm  
F2 0.00 Hz  
PPMCM 13.55932 ppm/cm  
HZCM 1705.18848 Hz/cm

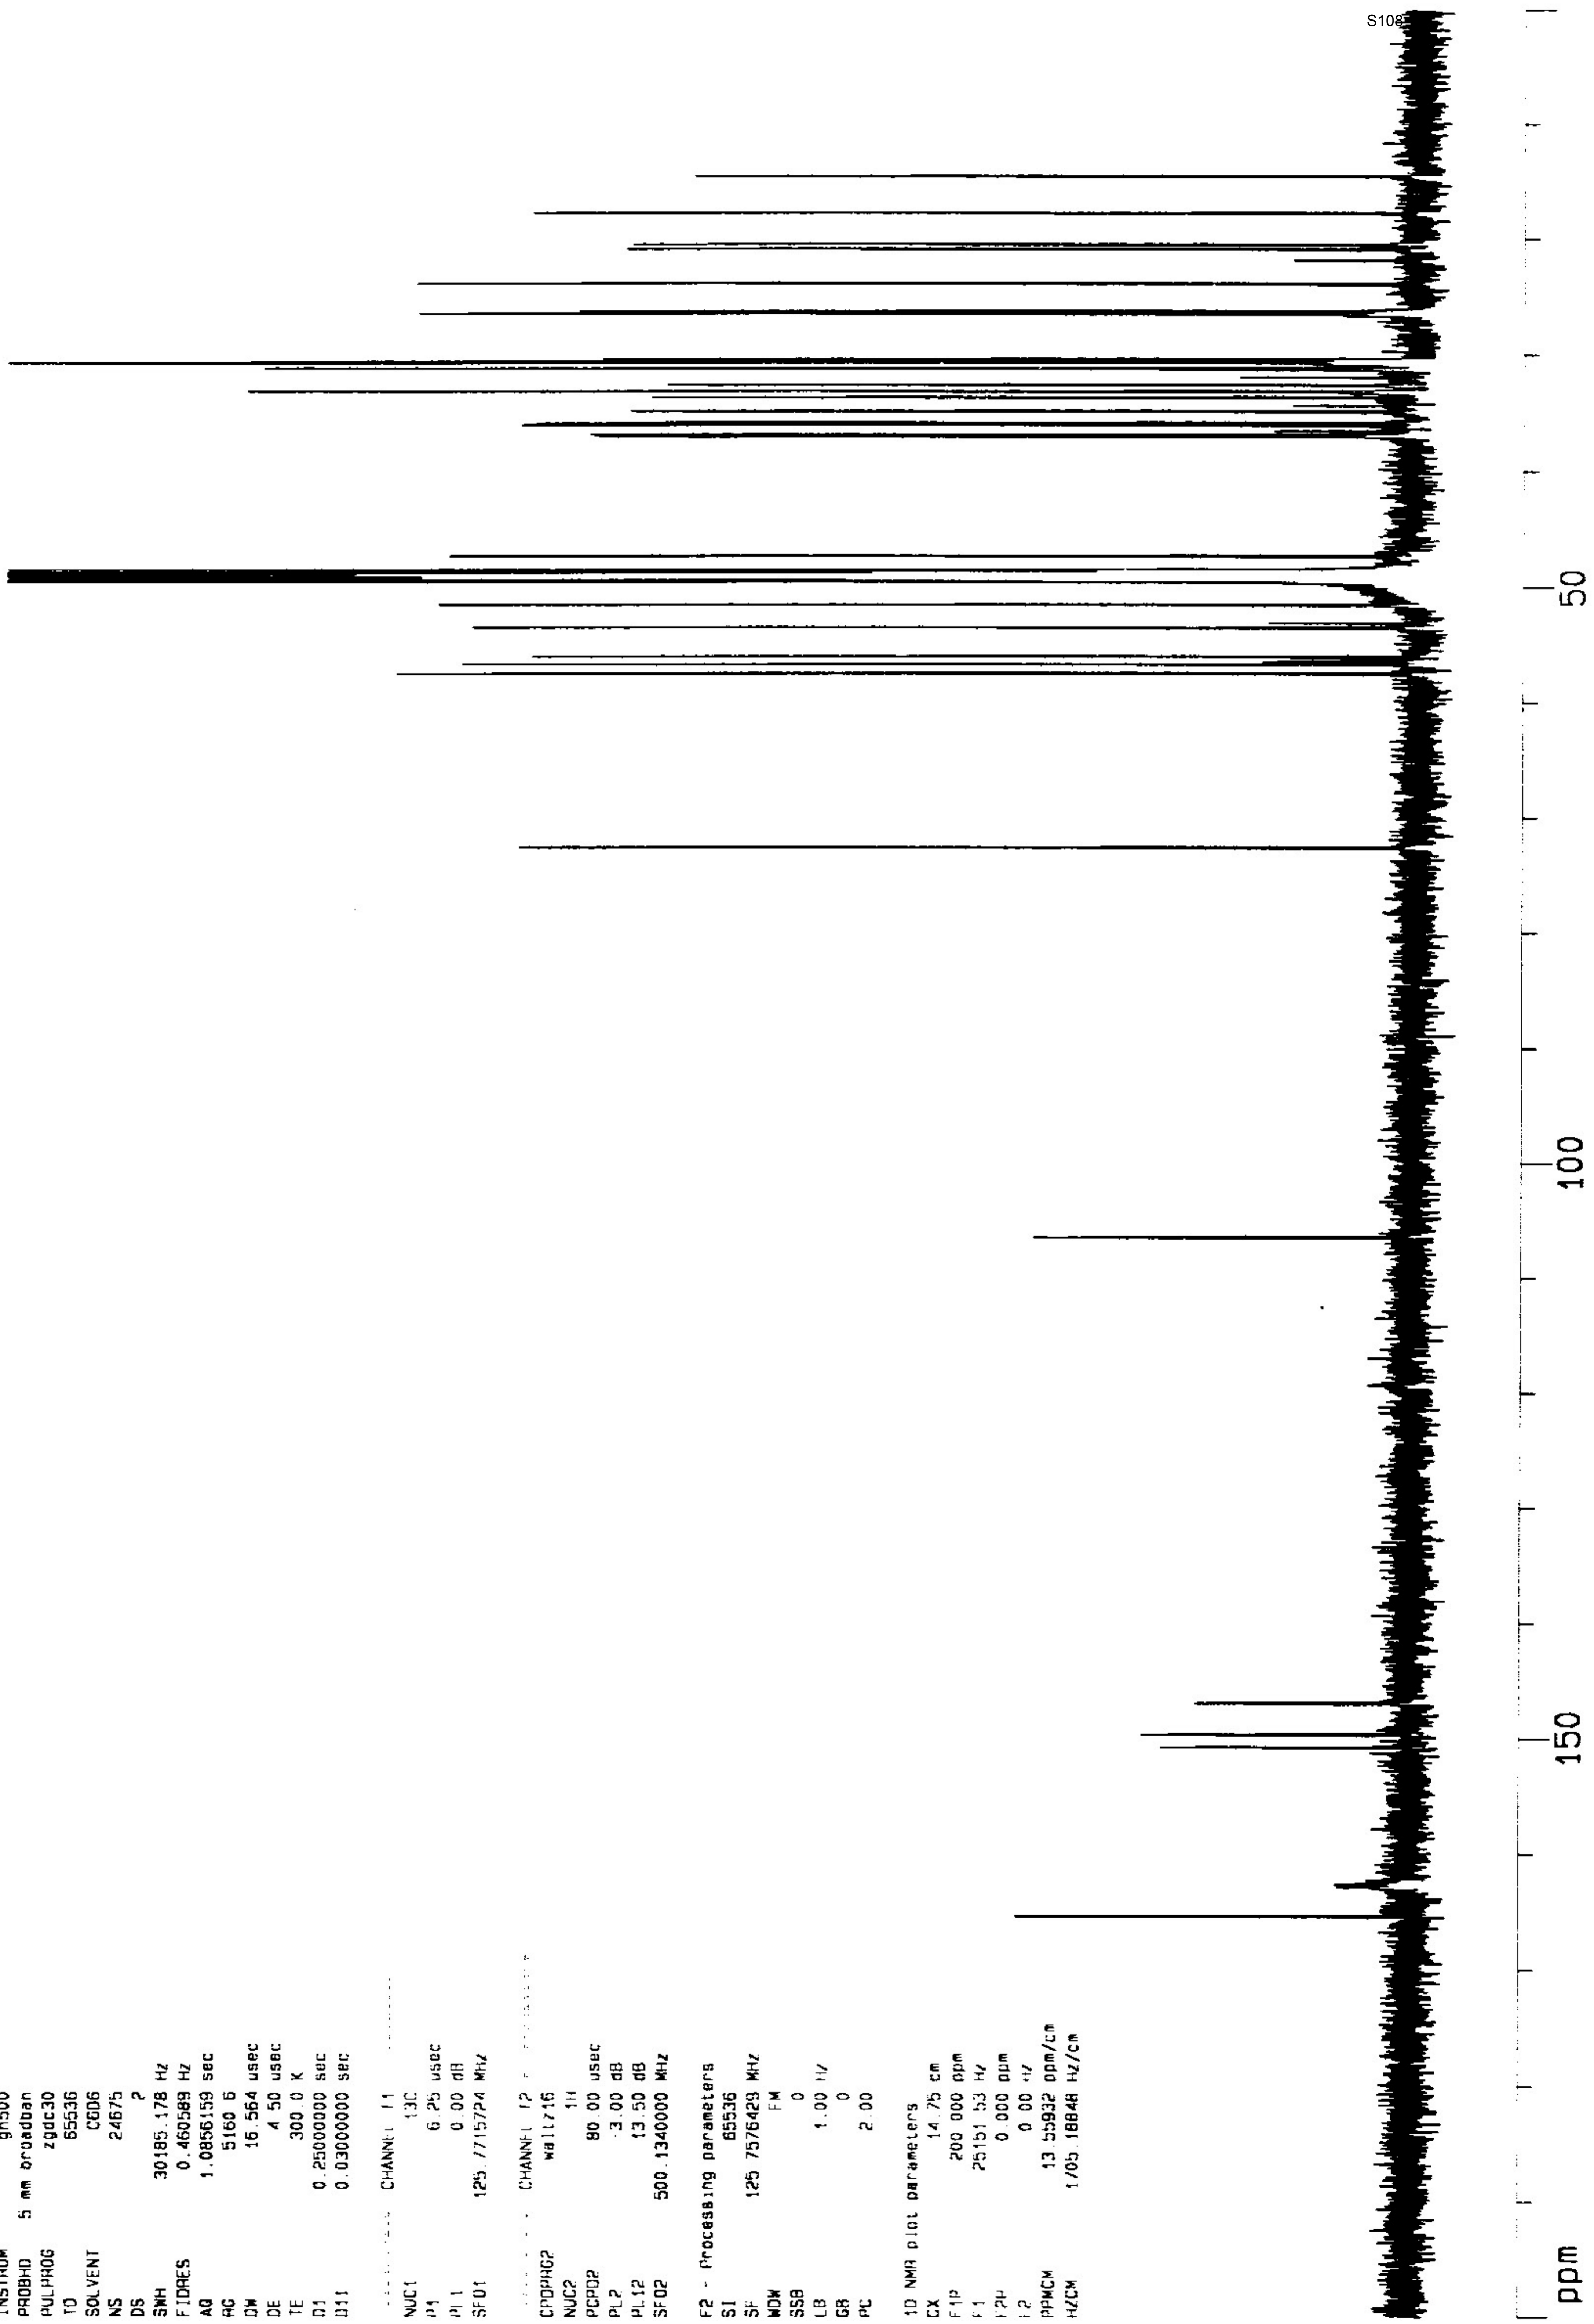

Current Data Parameters  
 USLR fcohen  
 NAME fc-v-214  
 EXPNO 1  
 PROCNO 1

F2 - Acquisition Parameters

Date\_ 20001229  
 Time 12 04  
 INSTRUM drx400  
 P4ORBIT 5 mm QNP 1H  
 PULPROG zg30  
 TO 65536  
 SOLVENT CDCl3  
 NS 24  
 DS 2  
 SWH 6410.256 Hz  
 FIDRES 0.097813 Hz  
 AQ 5.118579 sec  
 FC 322.5  
 CH 78.000 uSec  
 JE 4.50 uSec  
 TL 300.0 K  
 O1 0.1000000 sec

\*\*\*\*\* CHANNEL f1 \*\*\*\*\*

NUC1 1H  
 P1 12.00 usec  
 PL1 0.00 dB  
 SF01 400.1328009 MHz

F2 - Processing parameters

SI 65536  
 SF 400.1306217 MHz  
 WDW EM  
 SSB 0  
 LB 0.30 Hz  
 GB 0  
 PC 2.00

10 NMR plot parameters

CX 14.75 cm  
 F1P 10.000 ppm  
 F1 4001.30 Hz  
 F2P -0.500 ppm  
 F2 200.07 Hz  
 PHMCM 0.71186 ppm/cm  
 HZCM 284.63632 Hz/cm

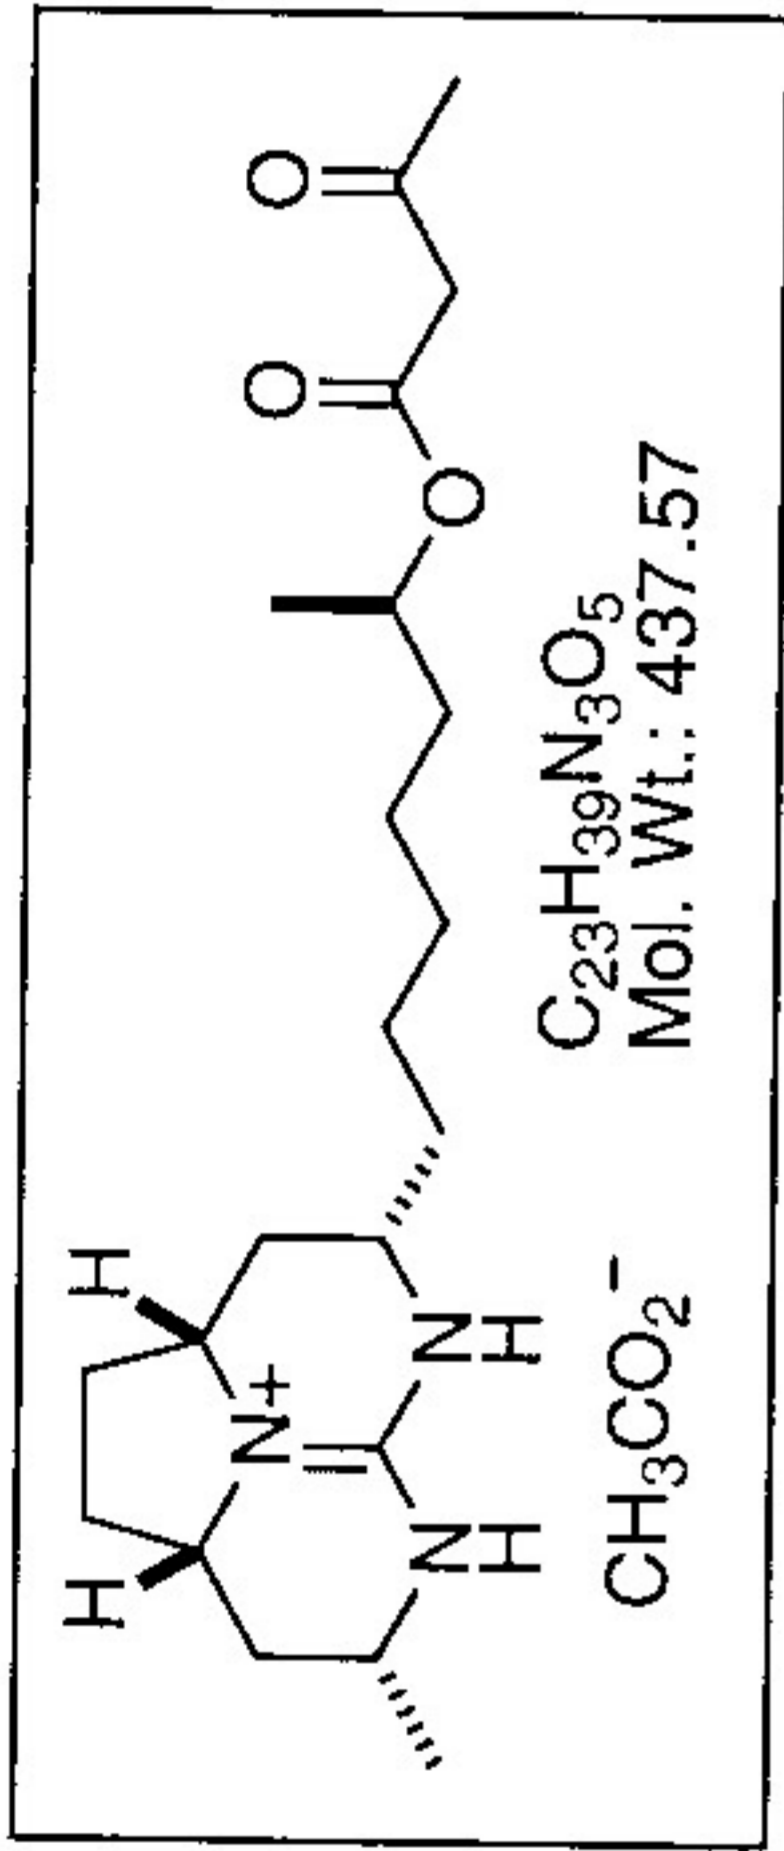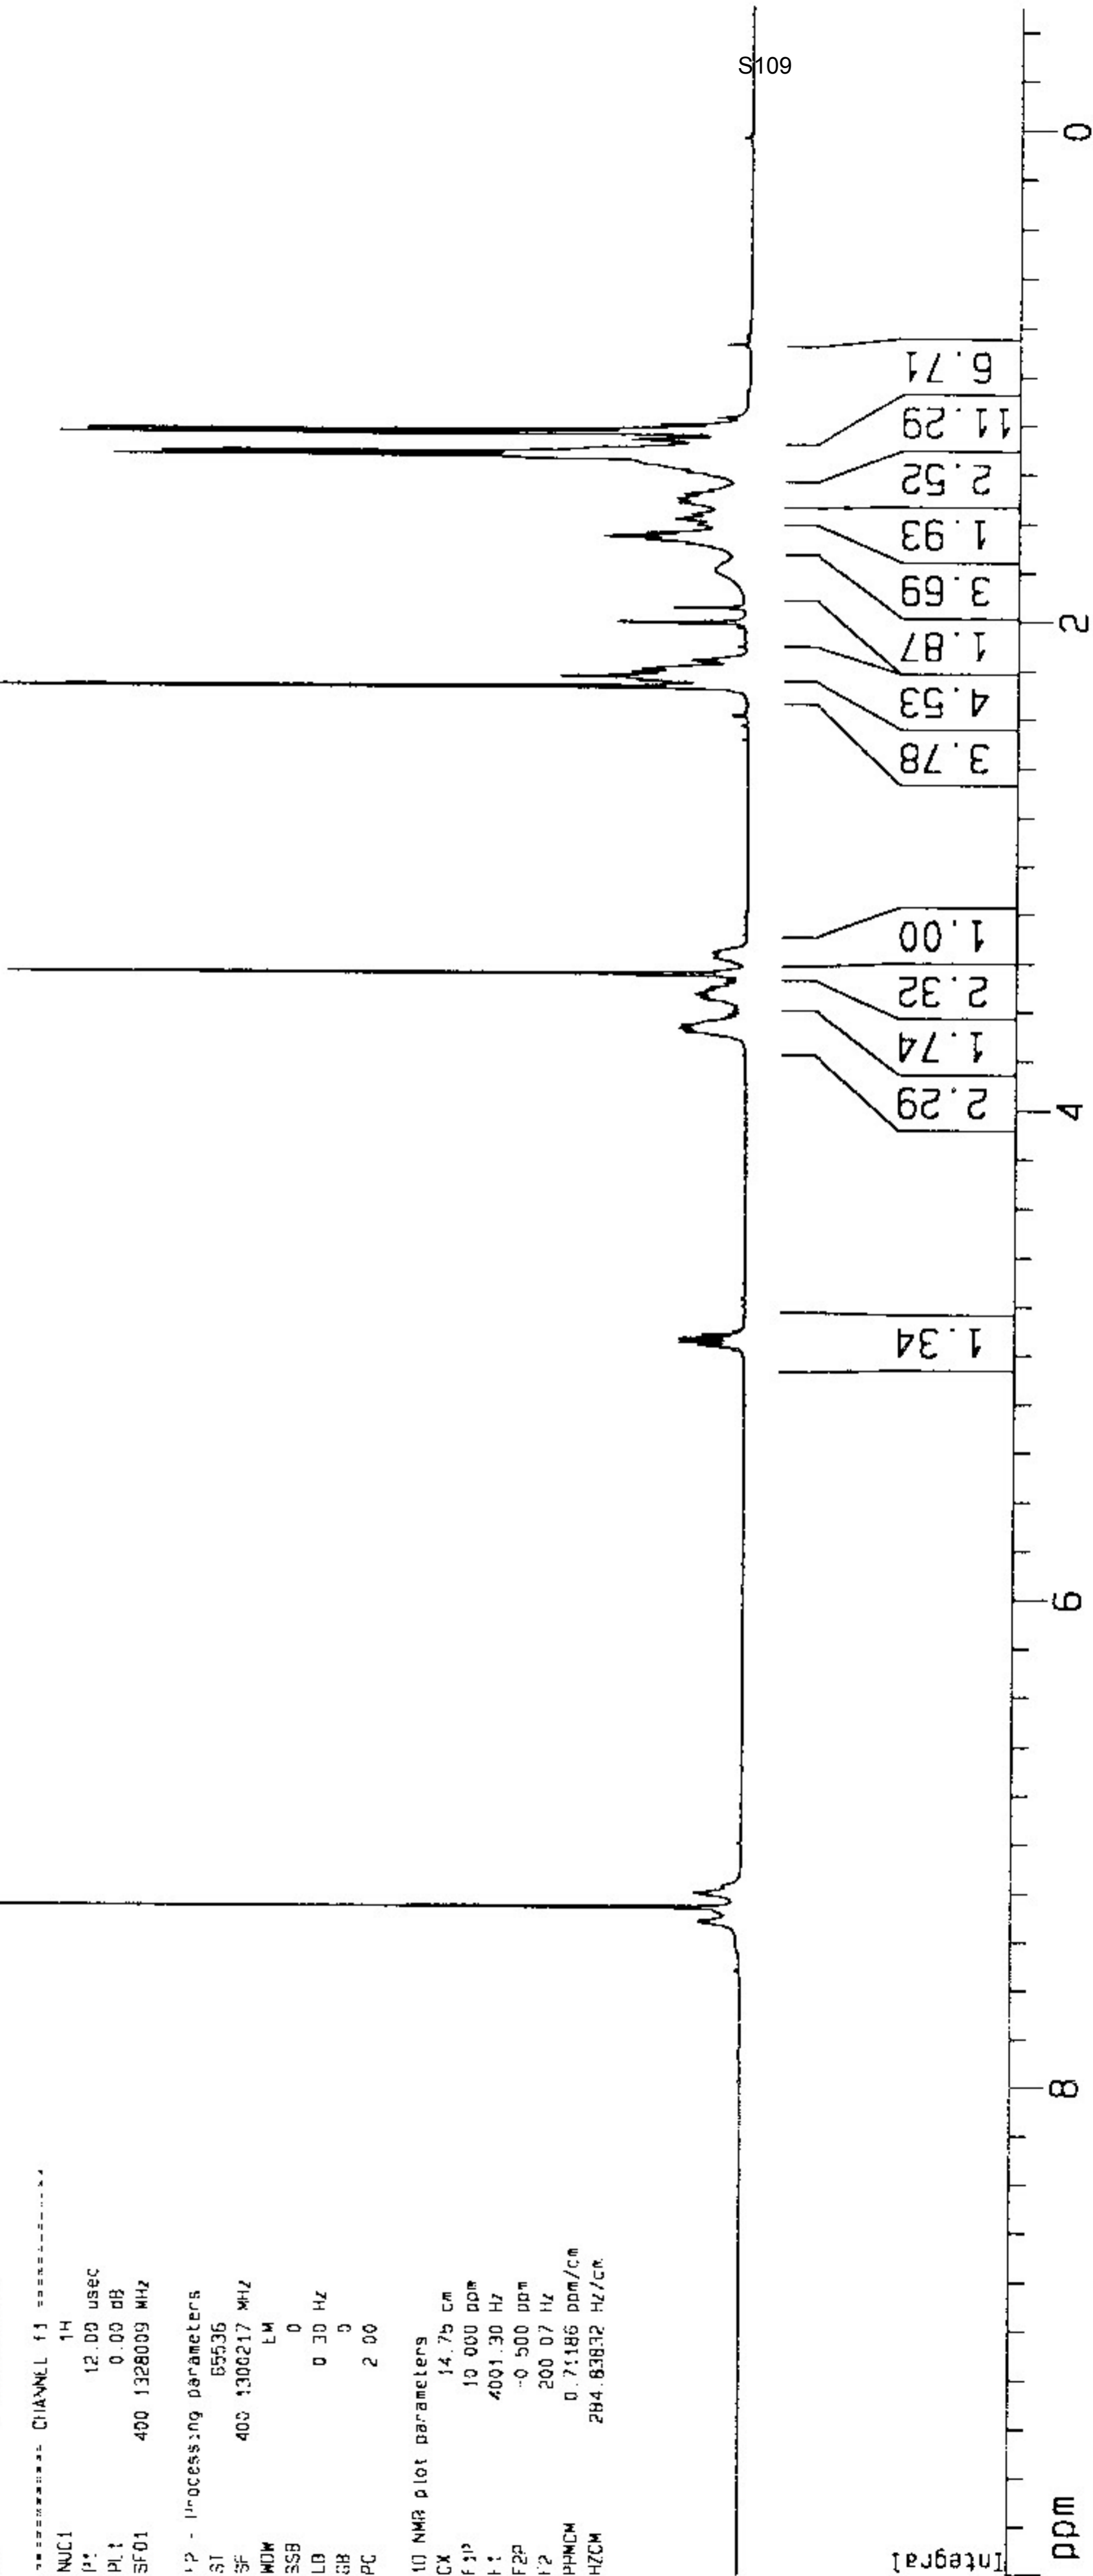



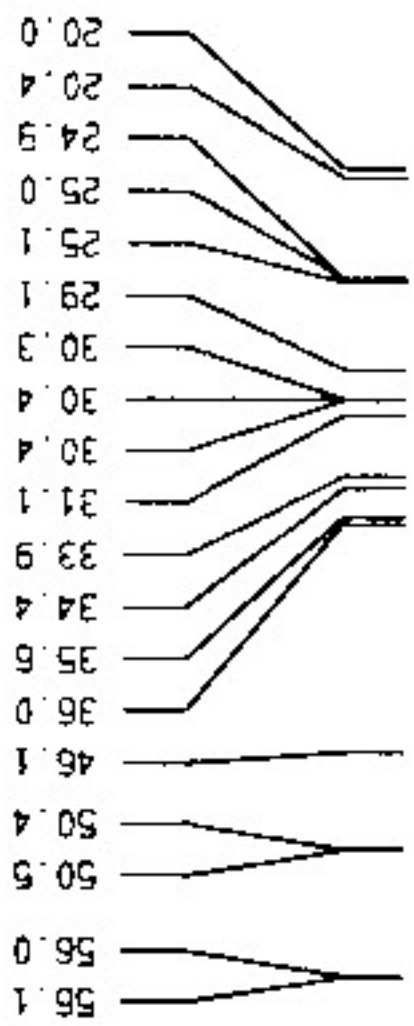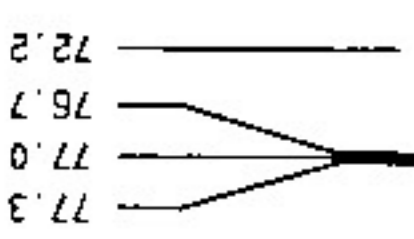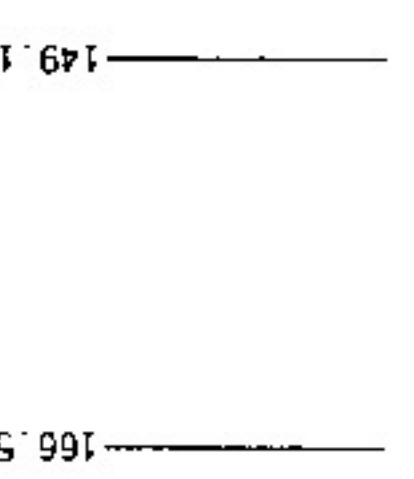

Current Data Parameters  
 USR fconen  
 NAME rc-v-214  
 EXPNO 2  
 PRDCNO 1

1: Acquisition Parameters  
 Date 20001229  
 Time 14.20  
 INS:RUM gn503  
 PROB-D 5 mm broadban  
 PULPROG zgpg30  
 TD 65536  
 SOLVENT MeOH  
 NS 2250  
 DS 2  
 SWH 30185.178 Hz  
 FIDRES 0.460589 Hz  
 AQ 1.0856159 sec  
 RG 5160.6  
 DM 16.564 usec  
 DF 4.50 usec  
 TE 300.0 K  
 D1 0.25000000 sec  
 D11 0.03000000 sec

CHANNEL F1  
 NUC1 13C  
 P1 6.25 usec  
 P11 0.00 dB  
 SF01 7715724 MHz

CHANNEL 12  
 CHOPROG2 waltz16  
 NUC2 1H  
 PCPD2 80.00 usec  
 PLP -3.00 dB  
 PL12 13.50 dB  
 SF02 500.1340000 MHz

2: Processing parameters  
 SI 65536  
 SF 125.7578156 MHz  
 WMW FM  
 SSB 0  
 LB 1.00 Hz  
 GB 0  
 PC 2.00

1D NMR plot parameters  
 CX 14.75 cm  
 F1P 210.000 ppm  
 F1 26409.14 Hz  
 F2P 0.000 ppm  
 F2 0.00 Hz  
 PCMC 14.23729 ppm/CP  
 HZCM 1790.45007 Hz/cm

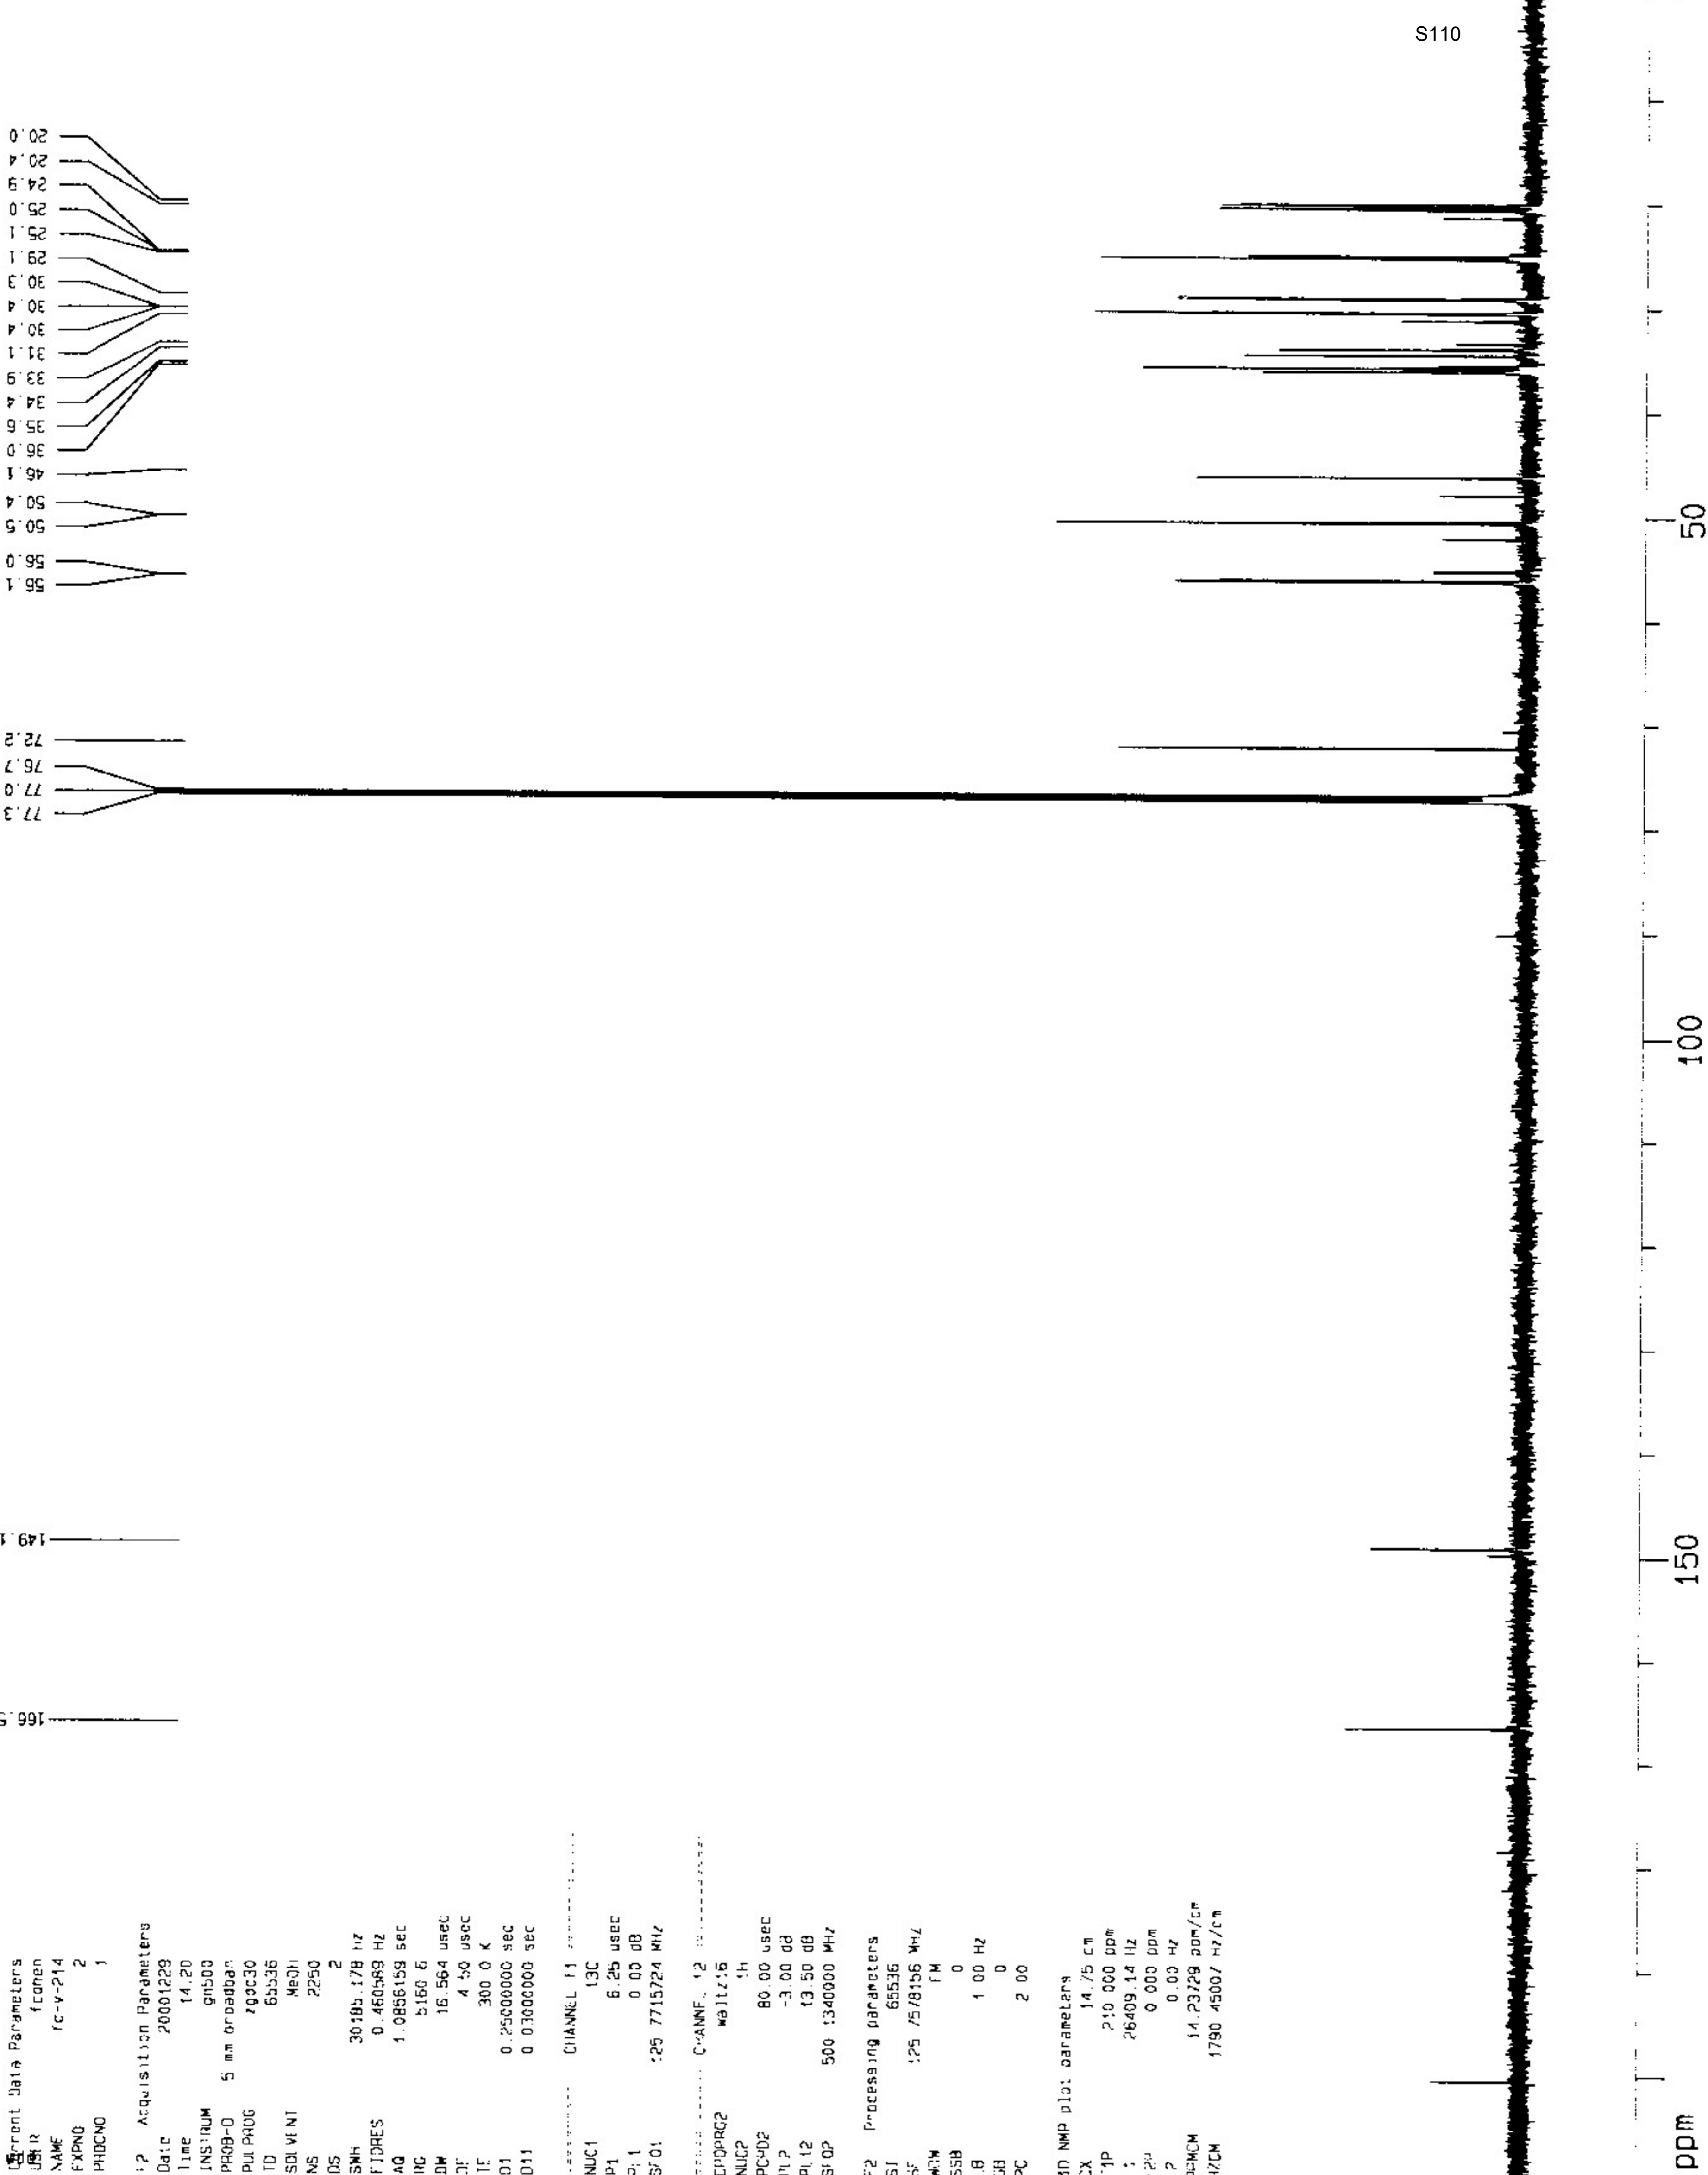

ppm

150

100

50

Current Data Parameters  
 USLR fcohen  
 NAME fc-v-272  
 EXPNO 1  
 PROCNO 1

F2 - Acquisition Parameters

Date 20010331  
 Time 8.34  
 INSTRUM gn500  
 PULPROG 5 mm broadband  
 PU:PROG zg30  
 SI 65536  
 SOLVENT MeOH  
 NS 32  
 DS 2  
 SWH 8012.820 Hz  
 FIDRES 0.122266 Hz  
 AQ 4.0894966 sec  
 RG 456 1  
 DM 62 400 usec  
 DE 6.00 usec  
 TE 300.0 K  
 D1 0.10000000 sec

\*\*\*\*\* CHANNEL f1 \*\*\*\*\*

NUC1 1H  
 P1 12.00 usec  
 PL1 -3.00 dB  
 SFO1 500.0335002 MHz

F2 Processing parameters

SI 32768  
 SF 500.0300134 MHz  
 WDM 1M  
 SSB 0  
 LB 0.30 Hz  
 GB 0  
 PC 4.00

1D NMR plot parameters

CX 14.75 cm  
 F10 10 000 ppm  
 F1 5000.30 Hz  
 F2 500 ppm  
 F3 250.01 Hz  
 FWHM 0.71186 ppm/cm  
 HZCM 365.95355 Hz/cm

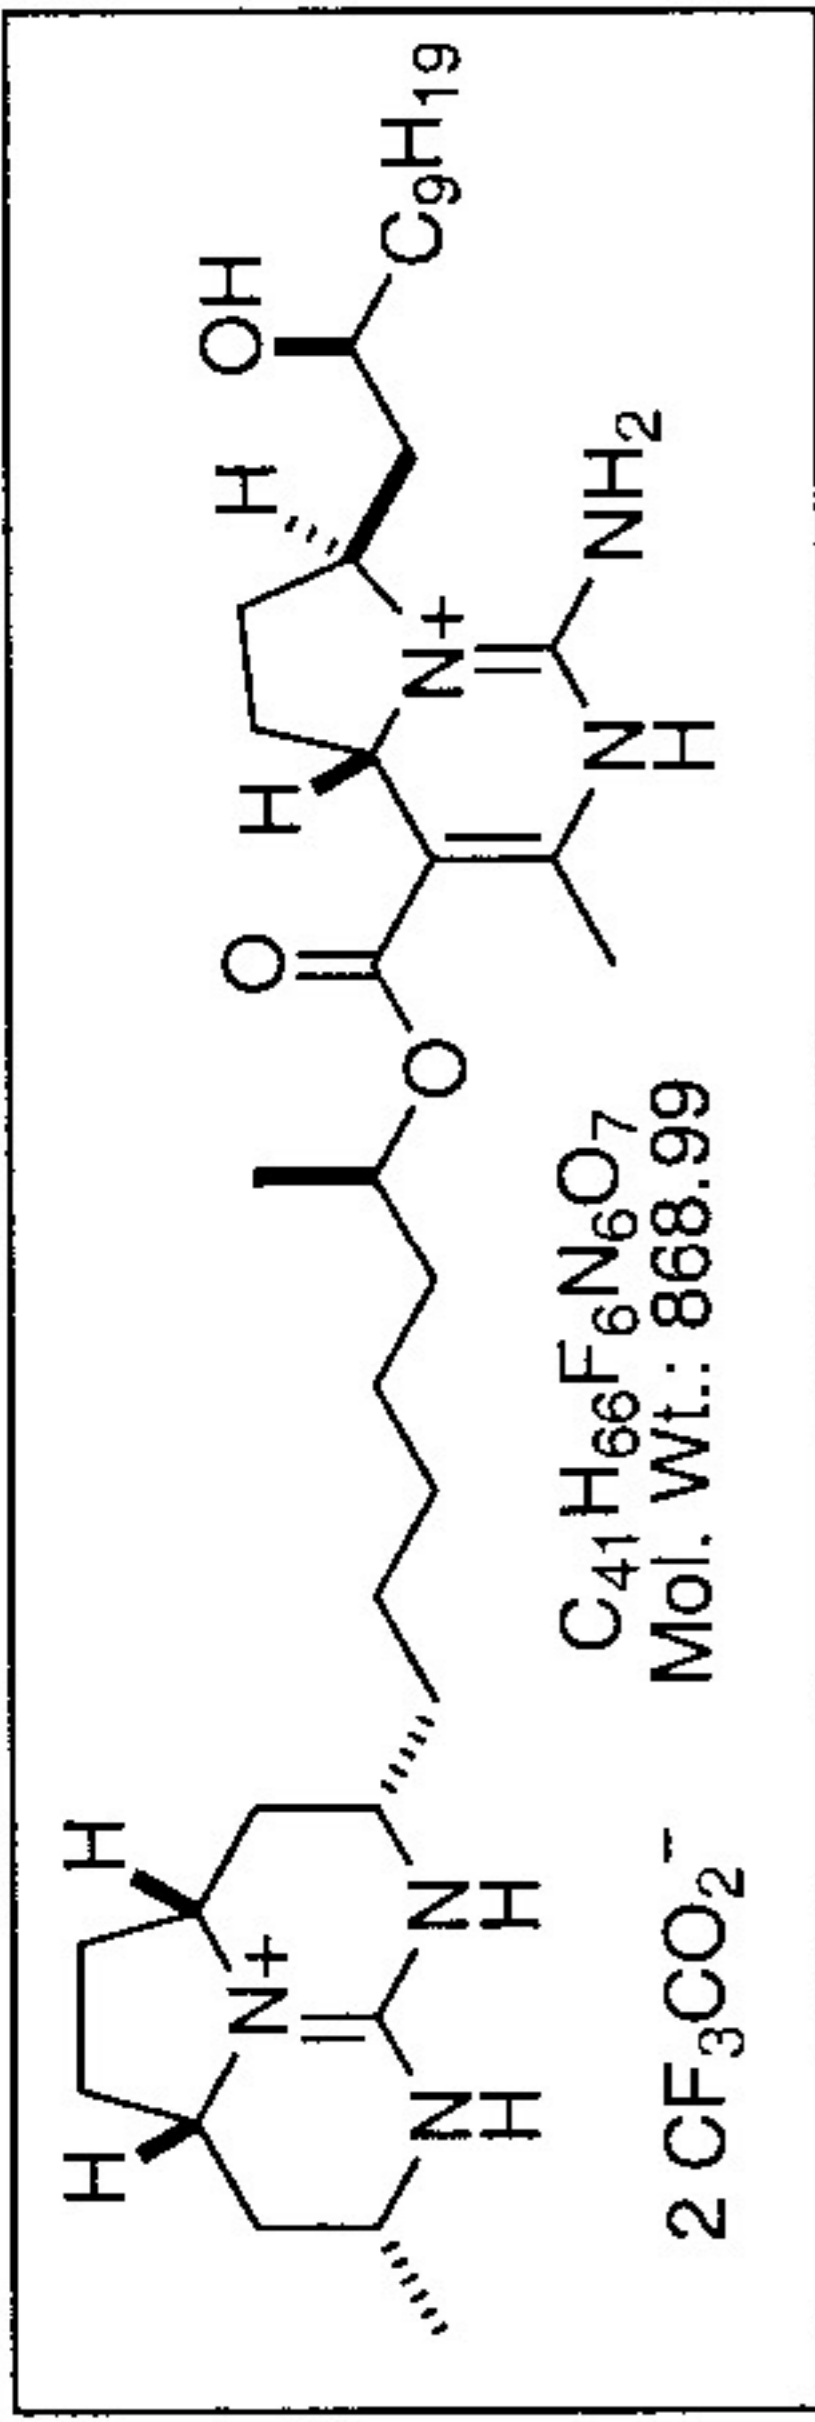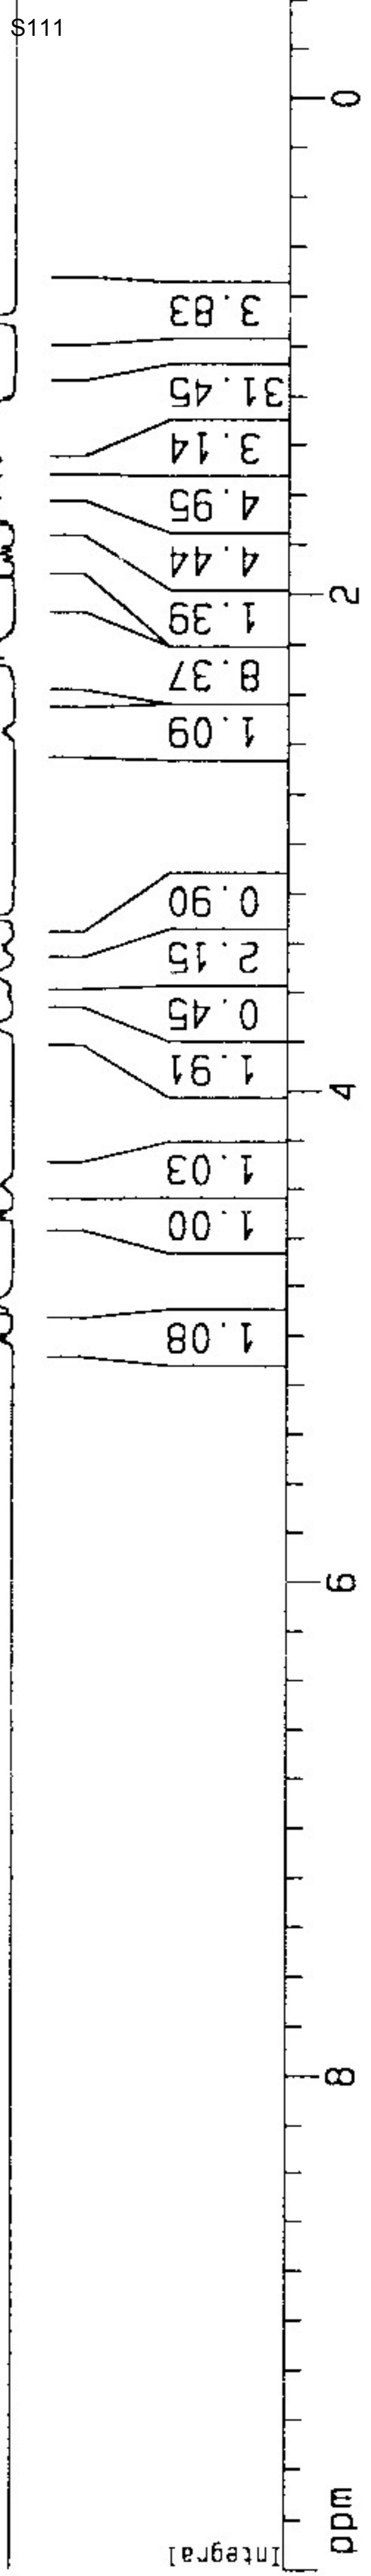

Experiment Parameters  
 USER fcohen  
 NAME rc-y-272  
 LXPRNO 2  
 PROCNO 1

F2 Acquisition Parameters  
 Date\_ 20070331  
 Time 10.47  
 INSTRUM gmb00  
 PROBD 5 mm broadband  
 PULPROG zgpg30  
 IC 65536  
 SOLVENT MeOH  
 NS 5100  
 DS 2  
 SWH 30303.031 Hz  
 FIDRES 0.487388 Hz  
 AQ 1.0813940 sec  
 RG 4597.5  
 DM 15.500 usec  
 DE 4.50 usec  
 TE 300.0 K  
 D1 0.25000000 sec  
 D11 0.03000000 sec

----- CHANNEL f1 -----  
 NUC1 13C  
 P1 6.25 usec  
 PL1 0.00 dB  
 SF01 125.7464486 MHz

----- CHANNEL f2 -----  
 CPDPRG2 waltz16  
 NUC2 1H  
 PCP2P 80.00 usec  
 PL2 -3.00 dB  
 PL1P 13.50 dB  
 SF02 500.0335002 MHz

F2 - Processing parameters  
 SI 65536  
 SF 125.7324692 MHz  
 WDW FM  
 SSB 0  
 GB 0  
 PC 2.00

1D NMR plot parameters  
 CX 14.75 cm  
 F1P 200.000 ppm  
 F1 25146.48 Hz  
 F2P 0.000 ppm  
 F2 0.00 Hz  
 PPMCM 13.55932 ppm/cm  
 HZCM 1704.84692 Hz/cm

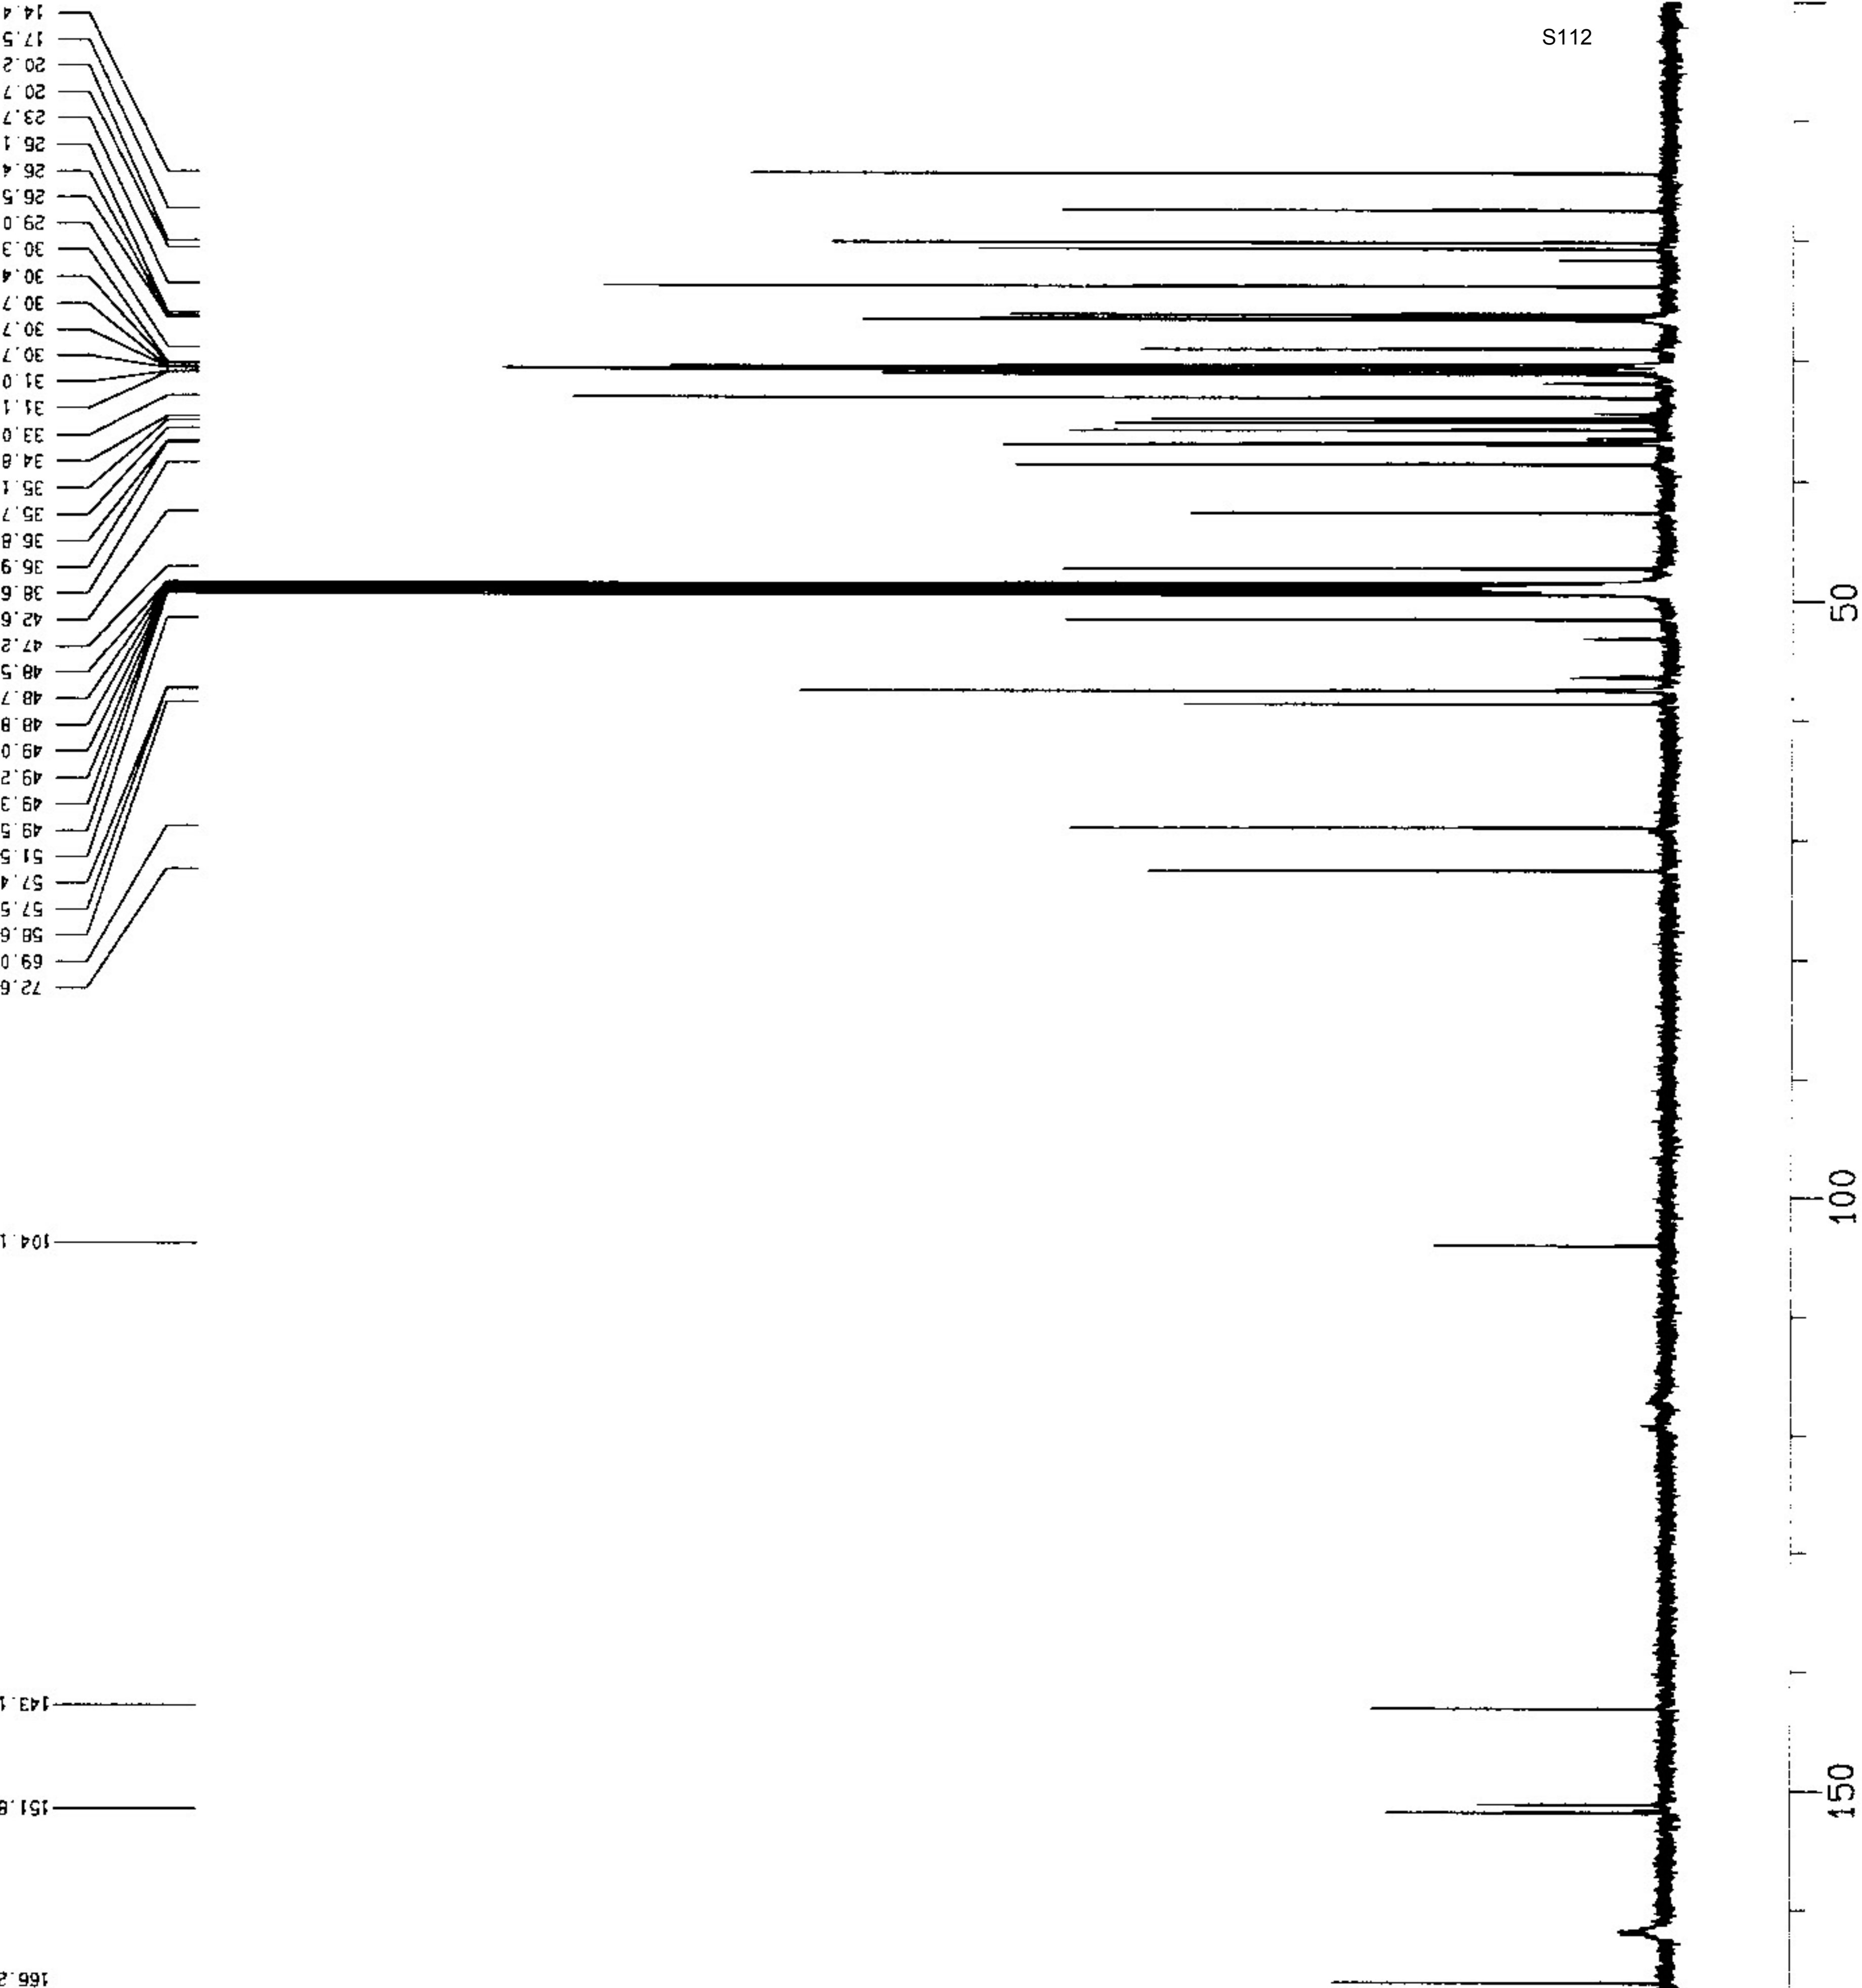

ppm

150

100

50

Current Data Parameters  
 USER f.cohen  
 NAME fc v 277  
 EXPNO 1  
 PROCNO 1

F2 Acquisition Parameters  
 Date 20010413  
 Time 9:54  
 INSTRUM gn500  
 PROBHD 5 mm broadban  
 PULPROG zg30  
 TD 65536  
 SOLVEN' CCl3  
 NS 24  
 DS 2  
 SWH 8012.820 Hz  
 FIDRES 0.122266 Hz  
 AQ 4.0894966 sec  
 RG 203.2  
 DW 62.400 usec  
 DE 6.60 usec  
 TE 300.0 K  
 D1 0.1000000 sec

..... CHANNEL F1 .....

NUC1 1H  
 P1 12.00 usec  
 PL1 3.00 dB  
 SF01 500.0335002 MHz

F2 Processing parameters  
 SI 32768  
 SF 500.0300134 MHz  
 WDW LM  
 SSB 0  
 LB 0.30 Hz  
 GB 0  
 PC 4.00

1D NMR plot parameters  
 CX 14.75 cm  
 F1P 10.000 ppm  
 F1 5000.30 Hz  
 F2P 0.500 ppm  
 F2 250.01 Hz  
 PPMCM 0.1185 ppm/cm  
 X/CM 355.95355 Hz/cm

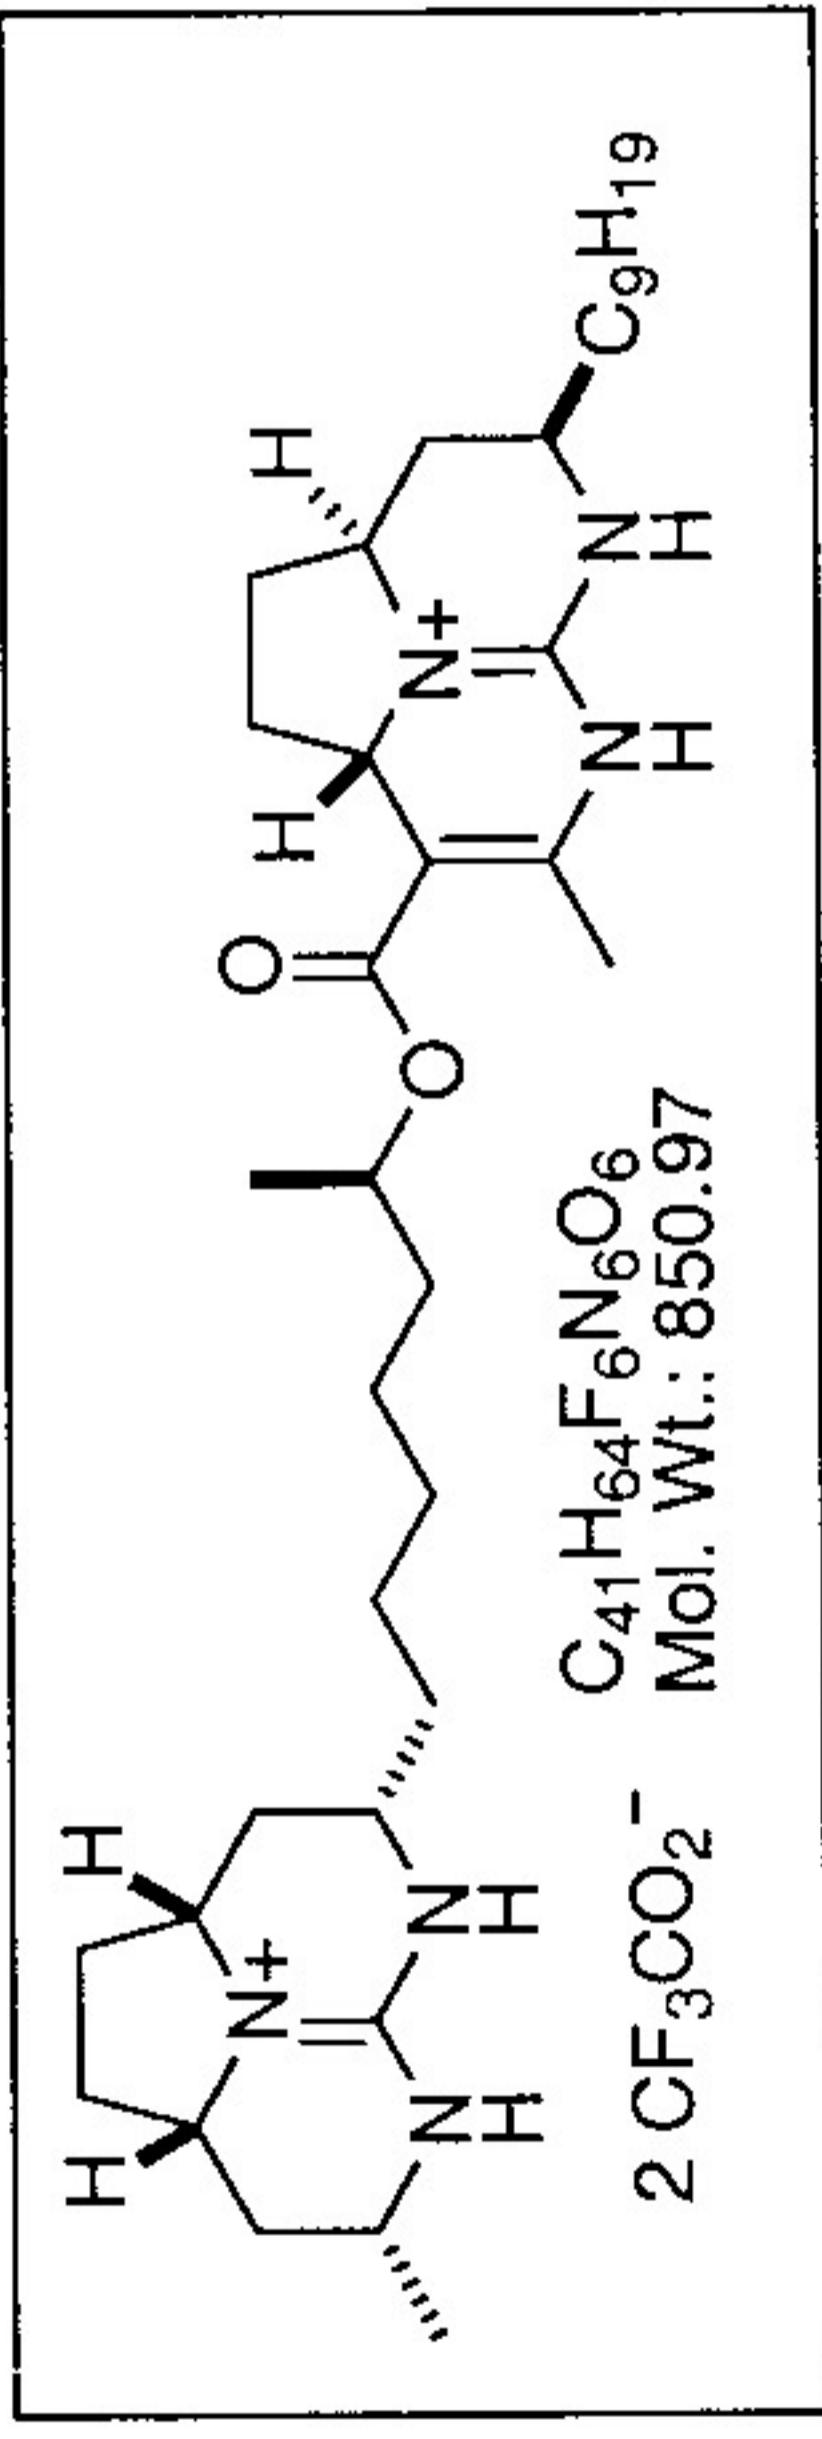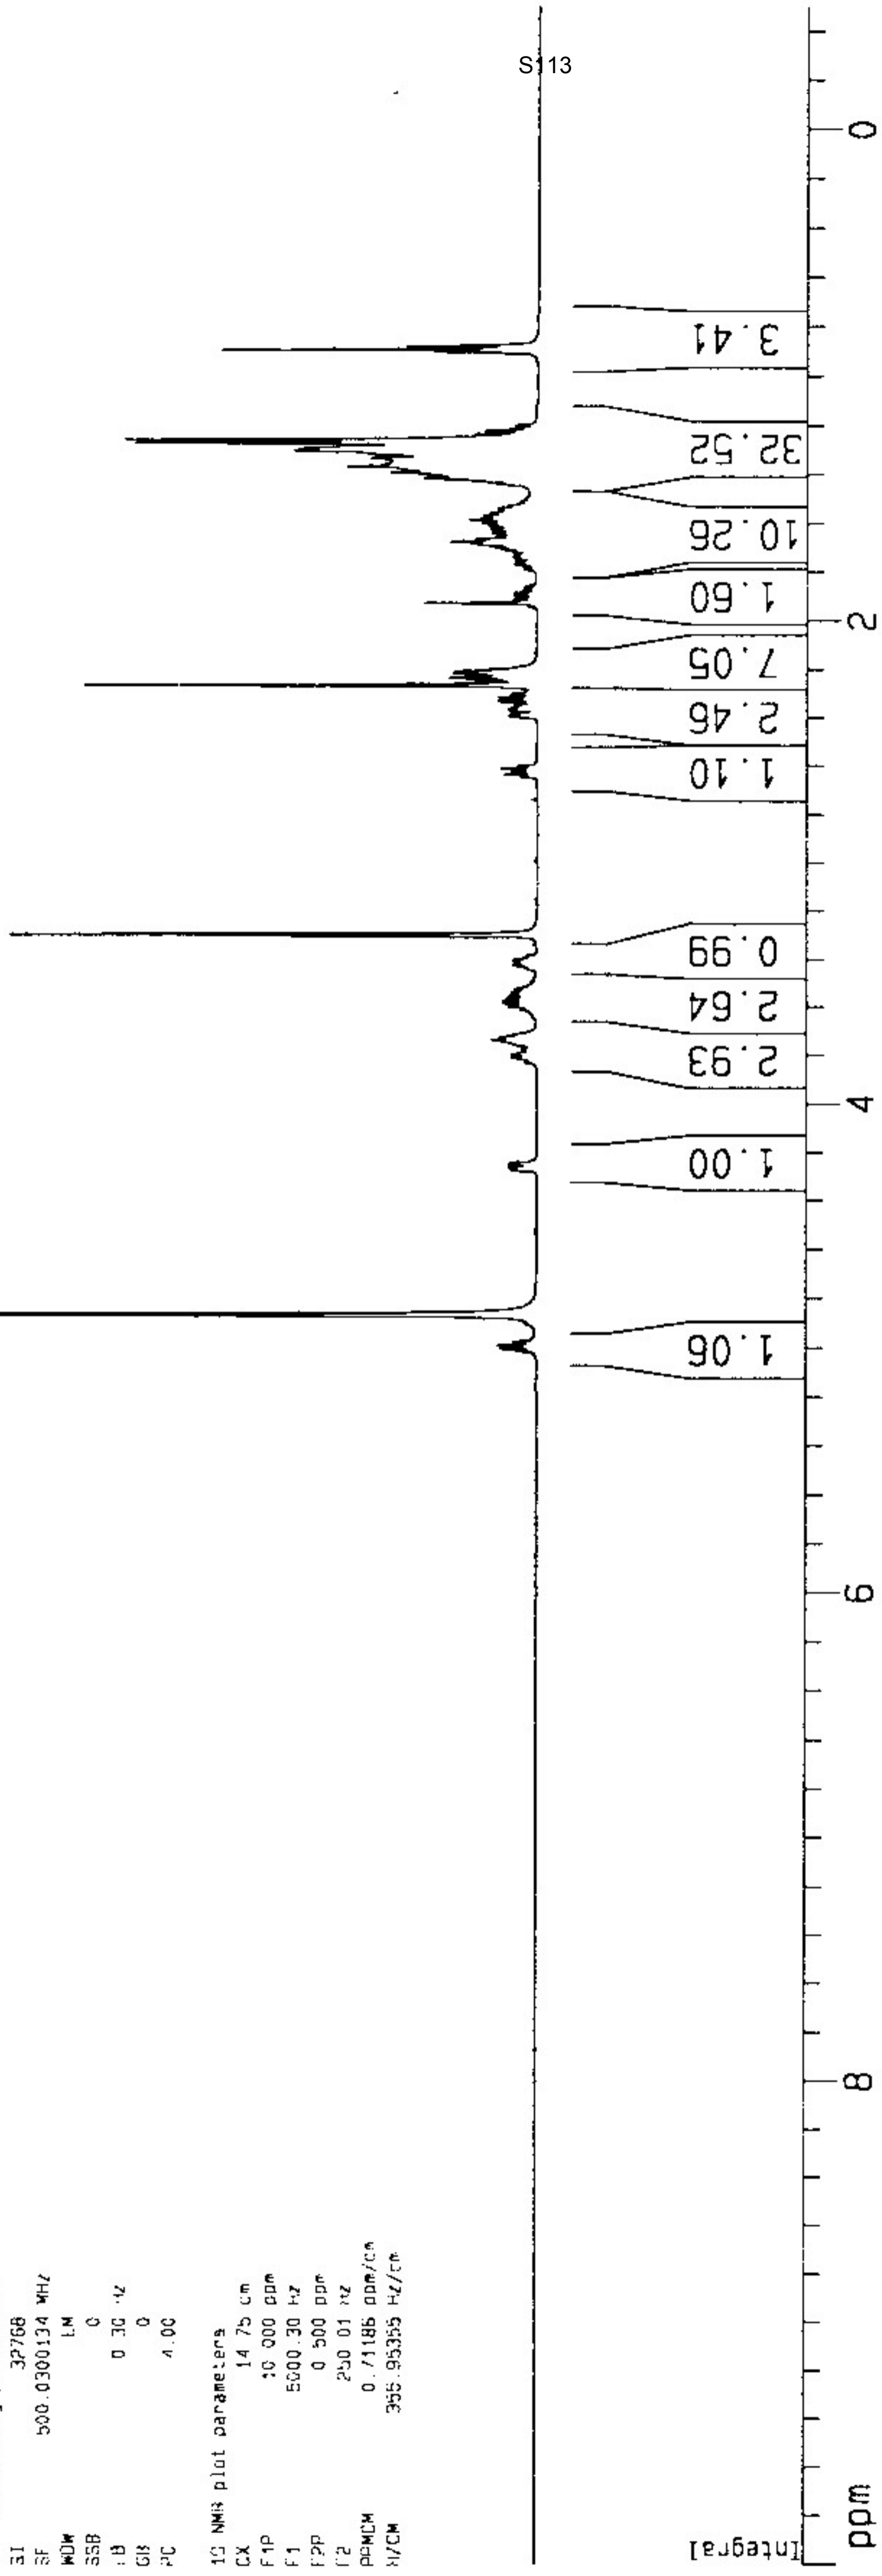

Current Data Parameters  
 JOB# 1  
 NAME fc v 225  
 EXPNO 3  
 PROCNO 1

F2 Acquisition Parameters  
 Date\_ 20010207  
 Time 7.23  
 INSTRUM spect  
 P1000 5 mm broadben  
 PULPROG zgpg30  
 TO 65536  
 SOLVENT MeOH  
 NS 19764  
 DS 2  
 SMH 30185.178 Hz  
 FIDRES 0.460589 Hz  
 AQ 1.0856159 sec  
 RG 2580.3  
 DM 15.564 usec  
 DE 4.50 usec  
 TE 300.2 K  
 D1 0.2500000 sec  
 D11 0.0300000 sec

===== CHANNEL f1 =====  
 NUC1 13C  
 P1 5.25 usec  
 PL1 0.00 dB  
 SF01 125.7715724 MHz

===== CHANNEL f2 =====  
 CPDPRGP wait136  
 NUC2 1H  
 PEPH2 80.00 usec  
 PL2 3.00 dB  
 PL12 13.50 dB  
 SF02 500.1340000 MHz

F2 Processing parameters  
 SI 65536  
 SF 125.7576433 MHz  
 WDW CW  
 SSB 0  
 LB 1.00 Hz  
 GB 0  
 PC 2.00

F2 NMR plot parameters  
 CX 14.75 cm  
 F1P 200.000 ppm  
 F1 25151.53 Hz  
 F2P 0.000 ppm  
 F2 0.00 Hz  
 PPMCM 13.55932 ppm/cm  
 WCM 1705.18823 Hz/cm

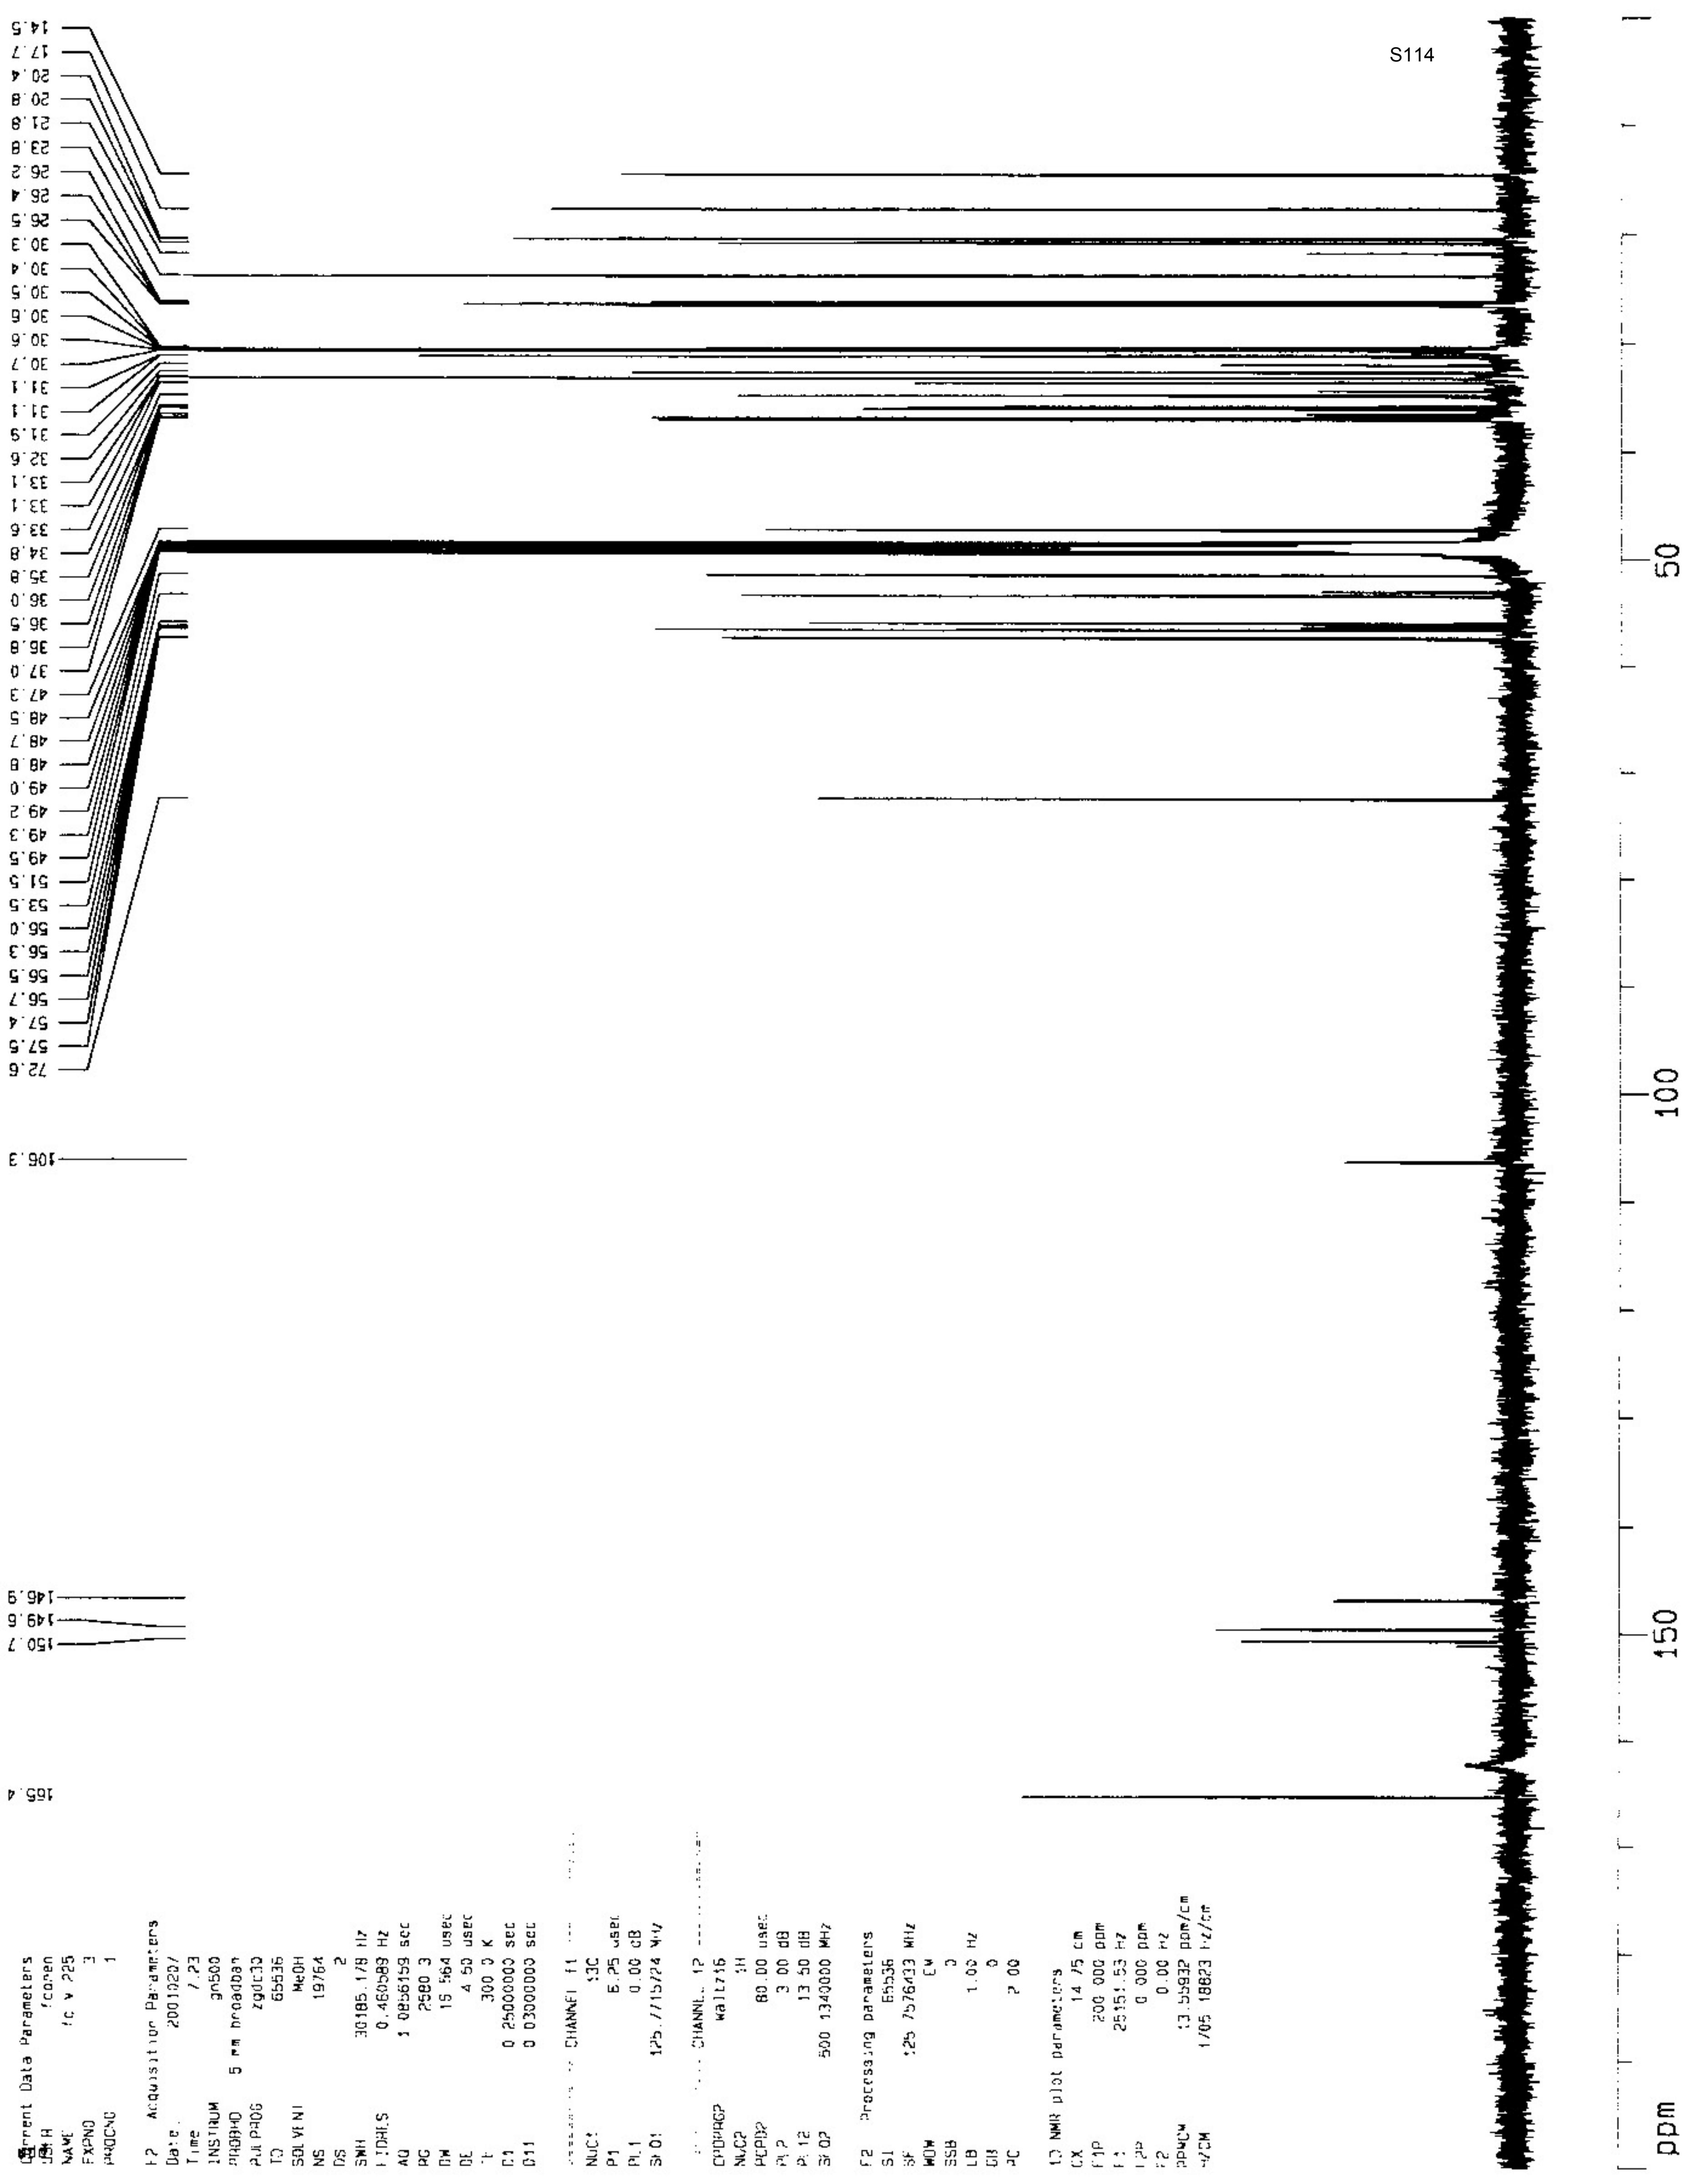

169.4  
 150.7  
 149.6  
 146.9

72.6  
 57.5  
 57.4  
 56.7  
 56.5  
 56.3  
 56.0  
 53.5  
 51.5  
 49.5  
 49.3  
 49.2  
 49.0  
 48.8  
 48.7  
 48.5  
 47.3  
 37.0  
 36.8  
 36.5  
 36.0  
 35.8  
 34.8  
 33.6  
 33.1  
 33.1  
 31.9  
 31.1  
 31.1  
 30.7  
 30.6  
 30.6  
 30.5  
 30.4  
 30.3  
 26.5  
 26.4  
 26.2  
 23.8  
 21.8  
 20.8  
 20.4  
 17.7  
 14.5

Current Data Parameters  
 LSF4 fcsghn  
 NAME fc-v 265  
 LX:ND \*  
 PROCNO \*

F2 Acquisition Parameters  
 Date: 20010323  
 Time: 8 55  
 INSTRUM gn503  
 PROCNO 5 nm broadband  
 PulProg zg30  
 LC 63536  
 SOLVENT CCl4  
 NS 32  
 DS 2  
 SWH 8012.820 Hz  
 FIDRES 0.122266 Hz  
 AQ 4.0994966 sec  
 RG 203.2  
 DM 62.400 usec  
 DE 6.00 usec  
 TE 300.0 K  
 D1 0.1000000 sec

----- CHANNEL f1 -----  
 NUC1 1H  
 P1 12.00 usec  
 PL1 -3.00 dB  
 SF1 500.033002 MHz

F2 Processing parameters  
 SI 32768  
 SF 500.0300129 MHz  
 WDM 1M  
 SSF 0  
 LB 0.30 Hz  
 GB 0  
 PC 4.00

1D NMR pict parameters  
 CX 14.75 cm  
 FIP 10.000 ppm  
 F1 5000.30 Hz  
 F2 250.01 Hz  
 PPMCM 0.71186 ppm/cm  
 HZCM 355.95355 Hz/cm

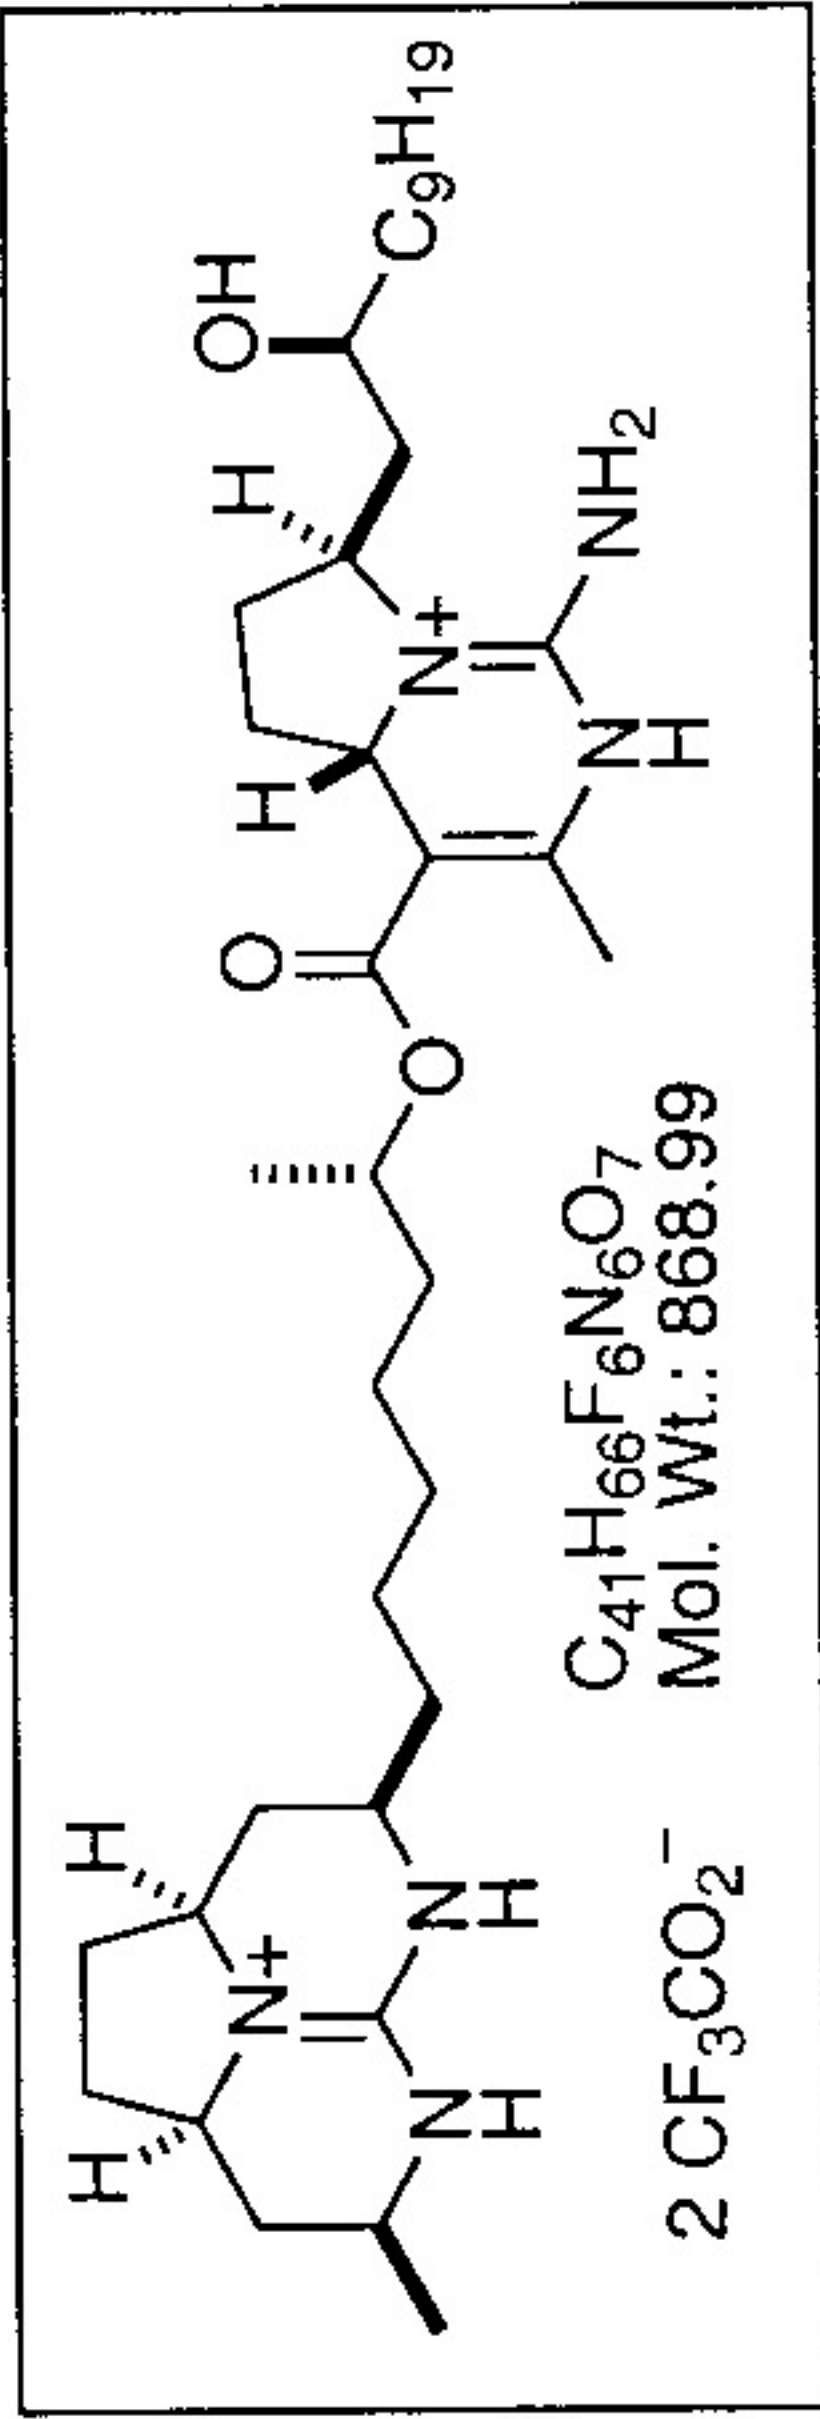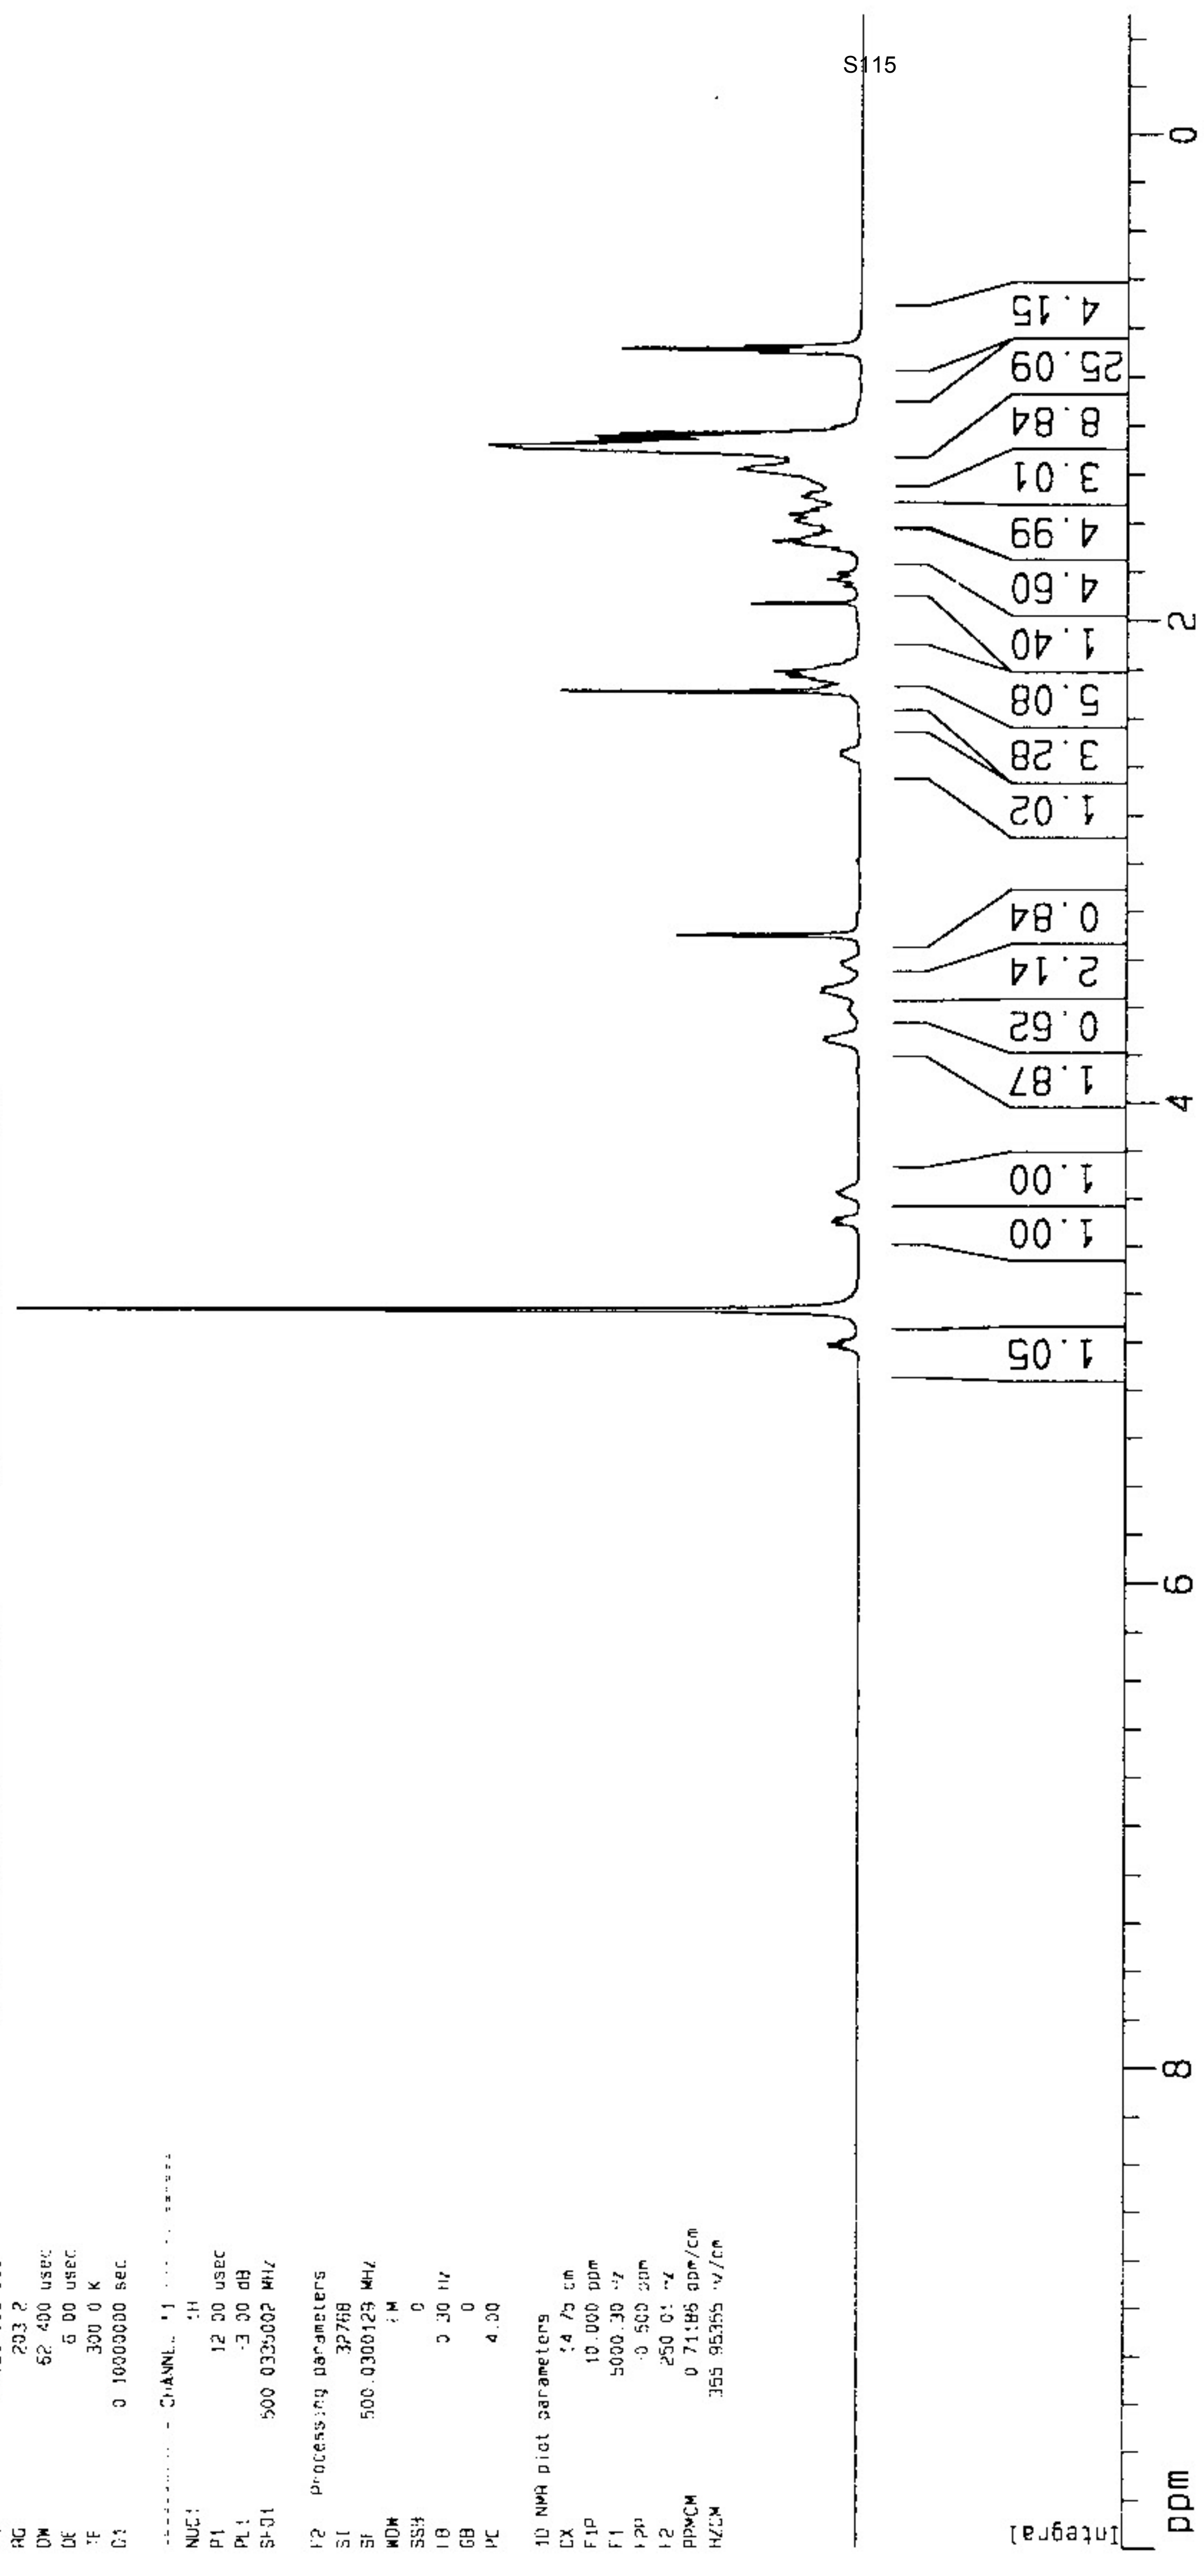

Current Data Parameters  
 USER fcoren  
 NAME IC-V-233  
 EXPNO 2  
 PROCNO 1

F2 - Acquisition Parameters  
 Date\_ 20010224  
 Time 12.21  
 INSTRUM gmb00  
 PROBHD 5 mm orca500  
 PULPROG zgpg30  
 ID 65536  
 SOLVENT MeOH  
 NS 3194  
 DS 2  
 SWH 30303.031 Hz  
 FIDRES 0.462388 Hz  
 AQ 0.0813940 sec  
 RG 3649 1  
 DM 16.500 usec  
 DE 4.50 usec  
 TE 300.0 K  
 D1 0.25000000 sec  
 D11 0.03000000 sec

--- CHANNEL f1 ---  
 NUC1 13C  
 P1 6.25 usec  
 PL1 0.00 dB  
 SF01 125.7715724 MHz

--- CHANNEL f2 ---  
 CPDPRG2 waltz16  
 NUC2 1H  
 PCPD2 90.00 usec  
 PL2 -3.00 dB  
 PL12 13.50 dB  
 SF02 500.1340000 MHz

F2 - Processing parameters  
 SI 65536  
 SF 125.7575130 MHz  
 WDW : M  
 SSB 0  
 LB 1.00 Hz  
 GB 0  
 PC 2.00

3D NMR plot parameters  
 CX 14.75 cm  
 F1P 200.000 ppm  
 F1 25157.52 Hz  
 F2P 0.000 ppm  
 F2 0.00 Hz  
 ppm0M 13.55932 ppm/cm  
 HZCM 1705.28787 Hz/cm

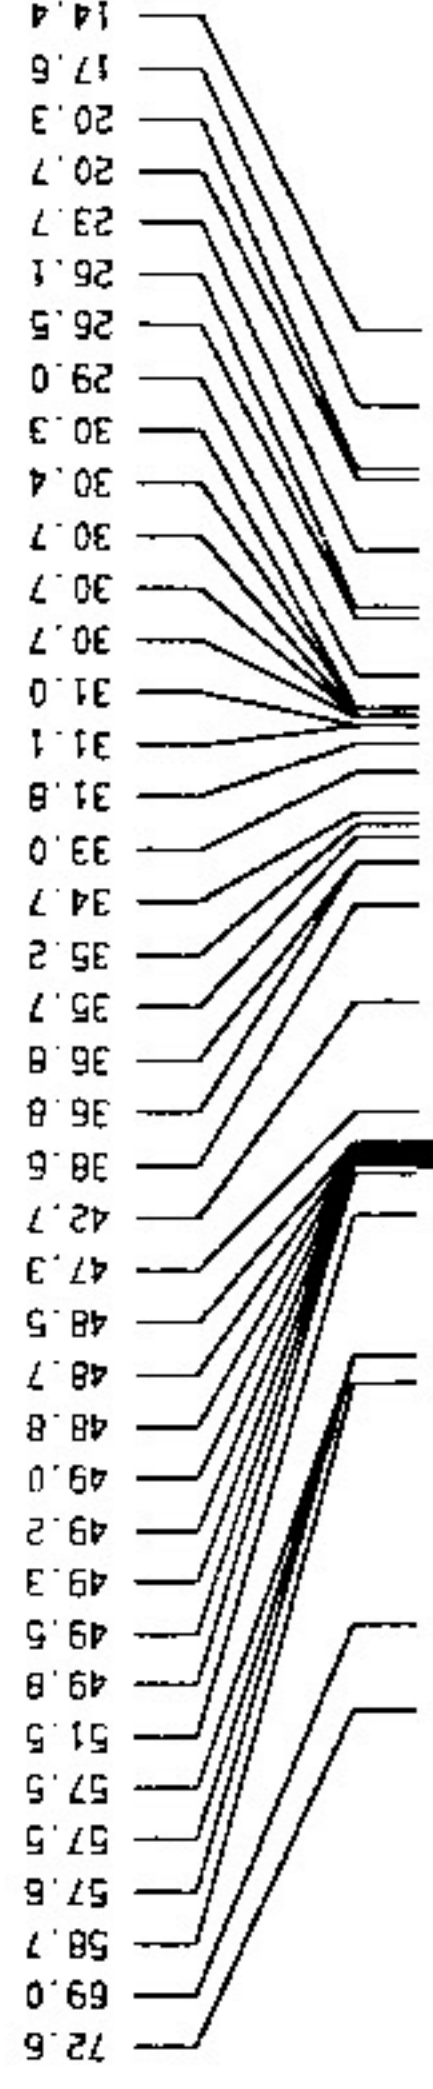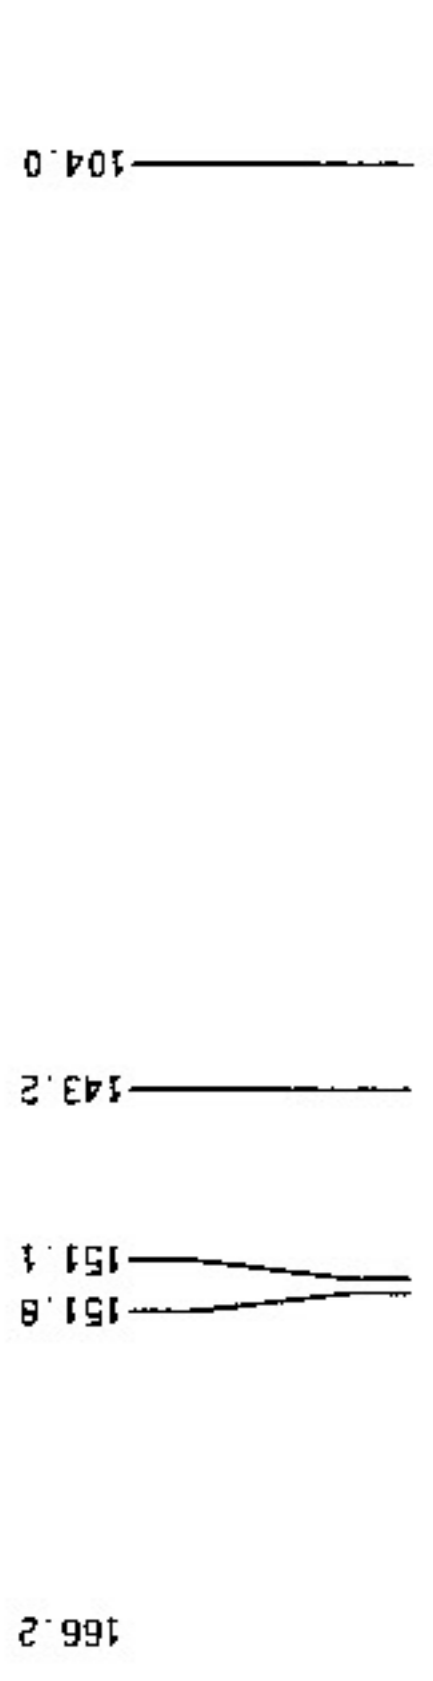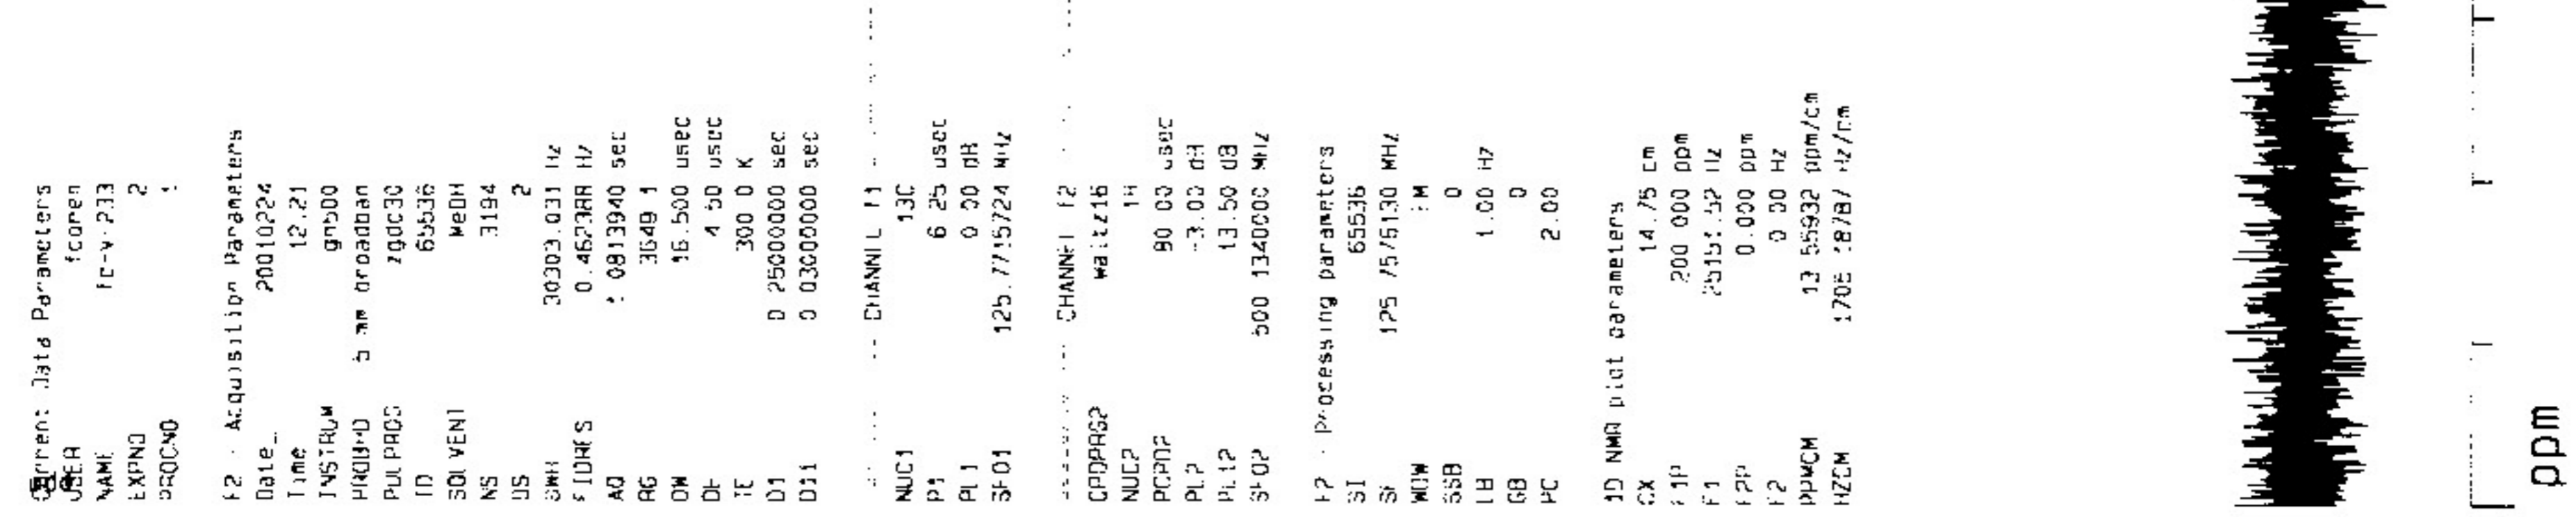

Current Data Parameters  
 USE1H fconen  
 NAME fc-y-273  
 EXPNO 1  
 PROCNO 1

F2 - Acquisition Parameters

Date\_ 20030327  
 Time 12 14  
 INSTRUM gn500  
 PROBRD 5 mm broadband  
 PULPROG zg30  
 TO 65536  
 SOLVENT Acetone  
 NS 16  
 DS 2  
 SWH 8812.820 Hz  
 FREQS 0 122266 Hz  
 AQ 4.0894956 sec  
 RG 90 b  
 CW 62.400 usec  
 DE 6.00 usec  
 LE 300.0 K  
 DT 0 1000000 sec

\*\*\*\*\* CHANNEL f1 \*\*\*\*\*

NUC1 1H  
 P1 12.00 usec  
 PL1 -3.00 dB  
 SF01 500.0335002 MHz

F2 - Processing parameters

SI 32768  
 SF 500.0300255 MHz  
 WDM EM  
 SSB 0  
 LB 0.30 Hz  
 GB 0  
 PC 4.00

1D NMR plot parameters

CX 14.75 cm  
 F1P 10.000 ppm  
 F1 5000.30 Hz  
 F2P -0.500 ppm  
 F2 -250.02 Hz  
 PPMCM 0 71185 ppm/cm  
 HZCM 355 95358 Hz/cm

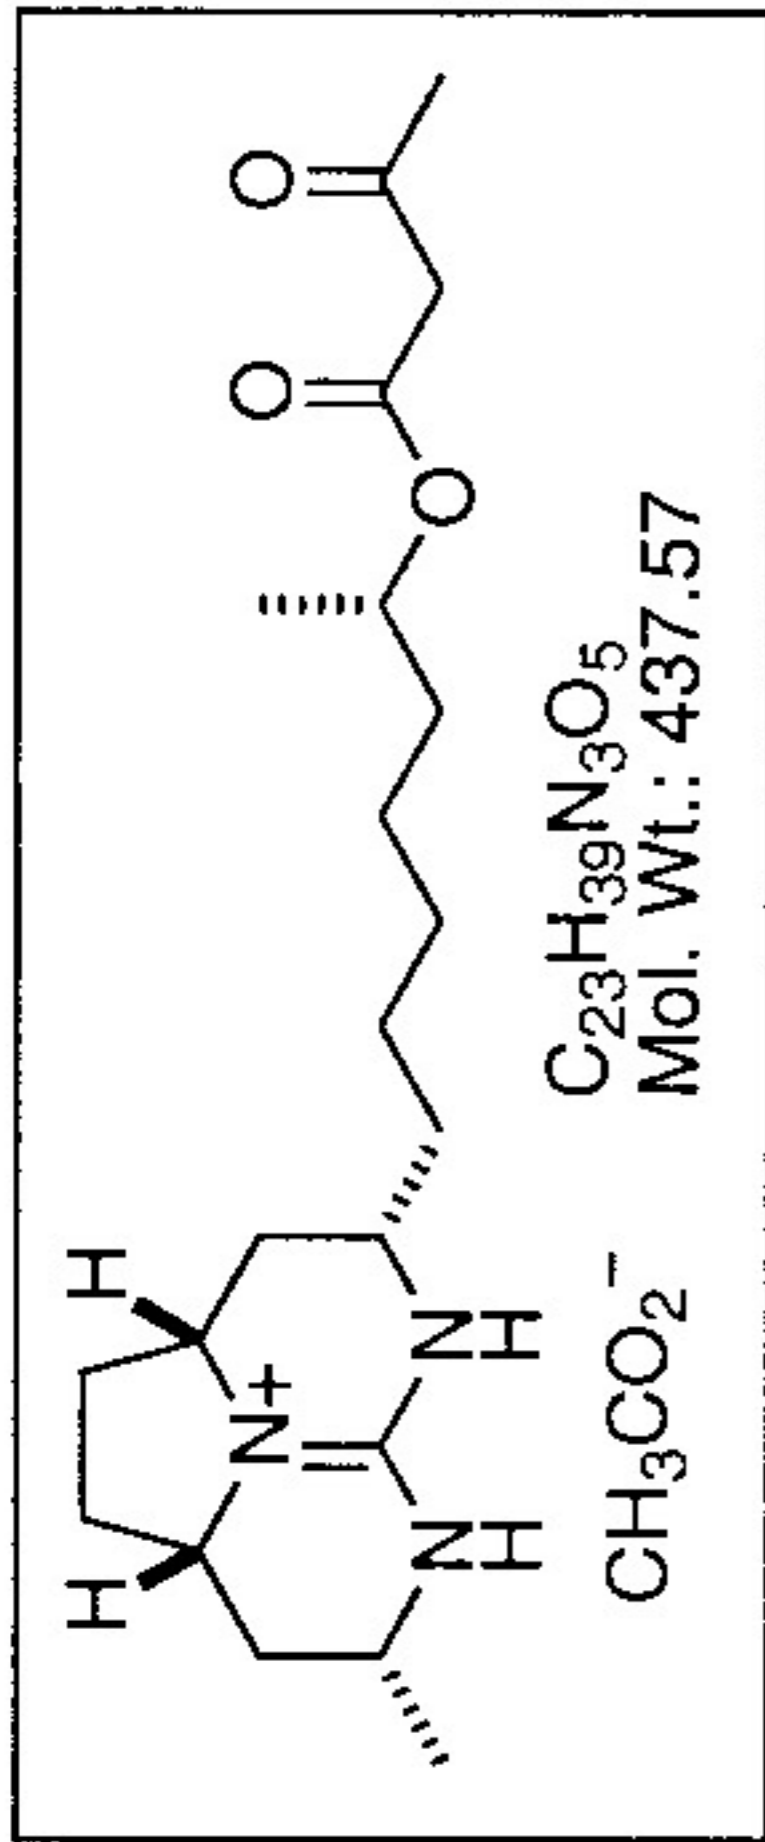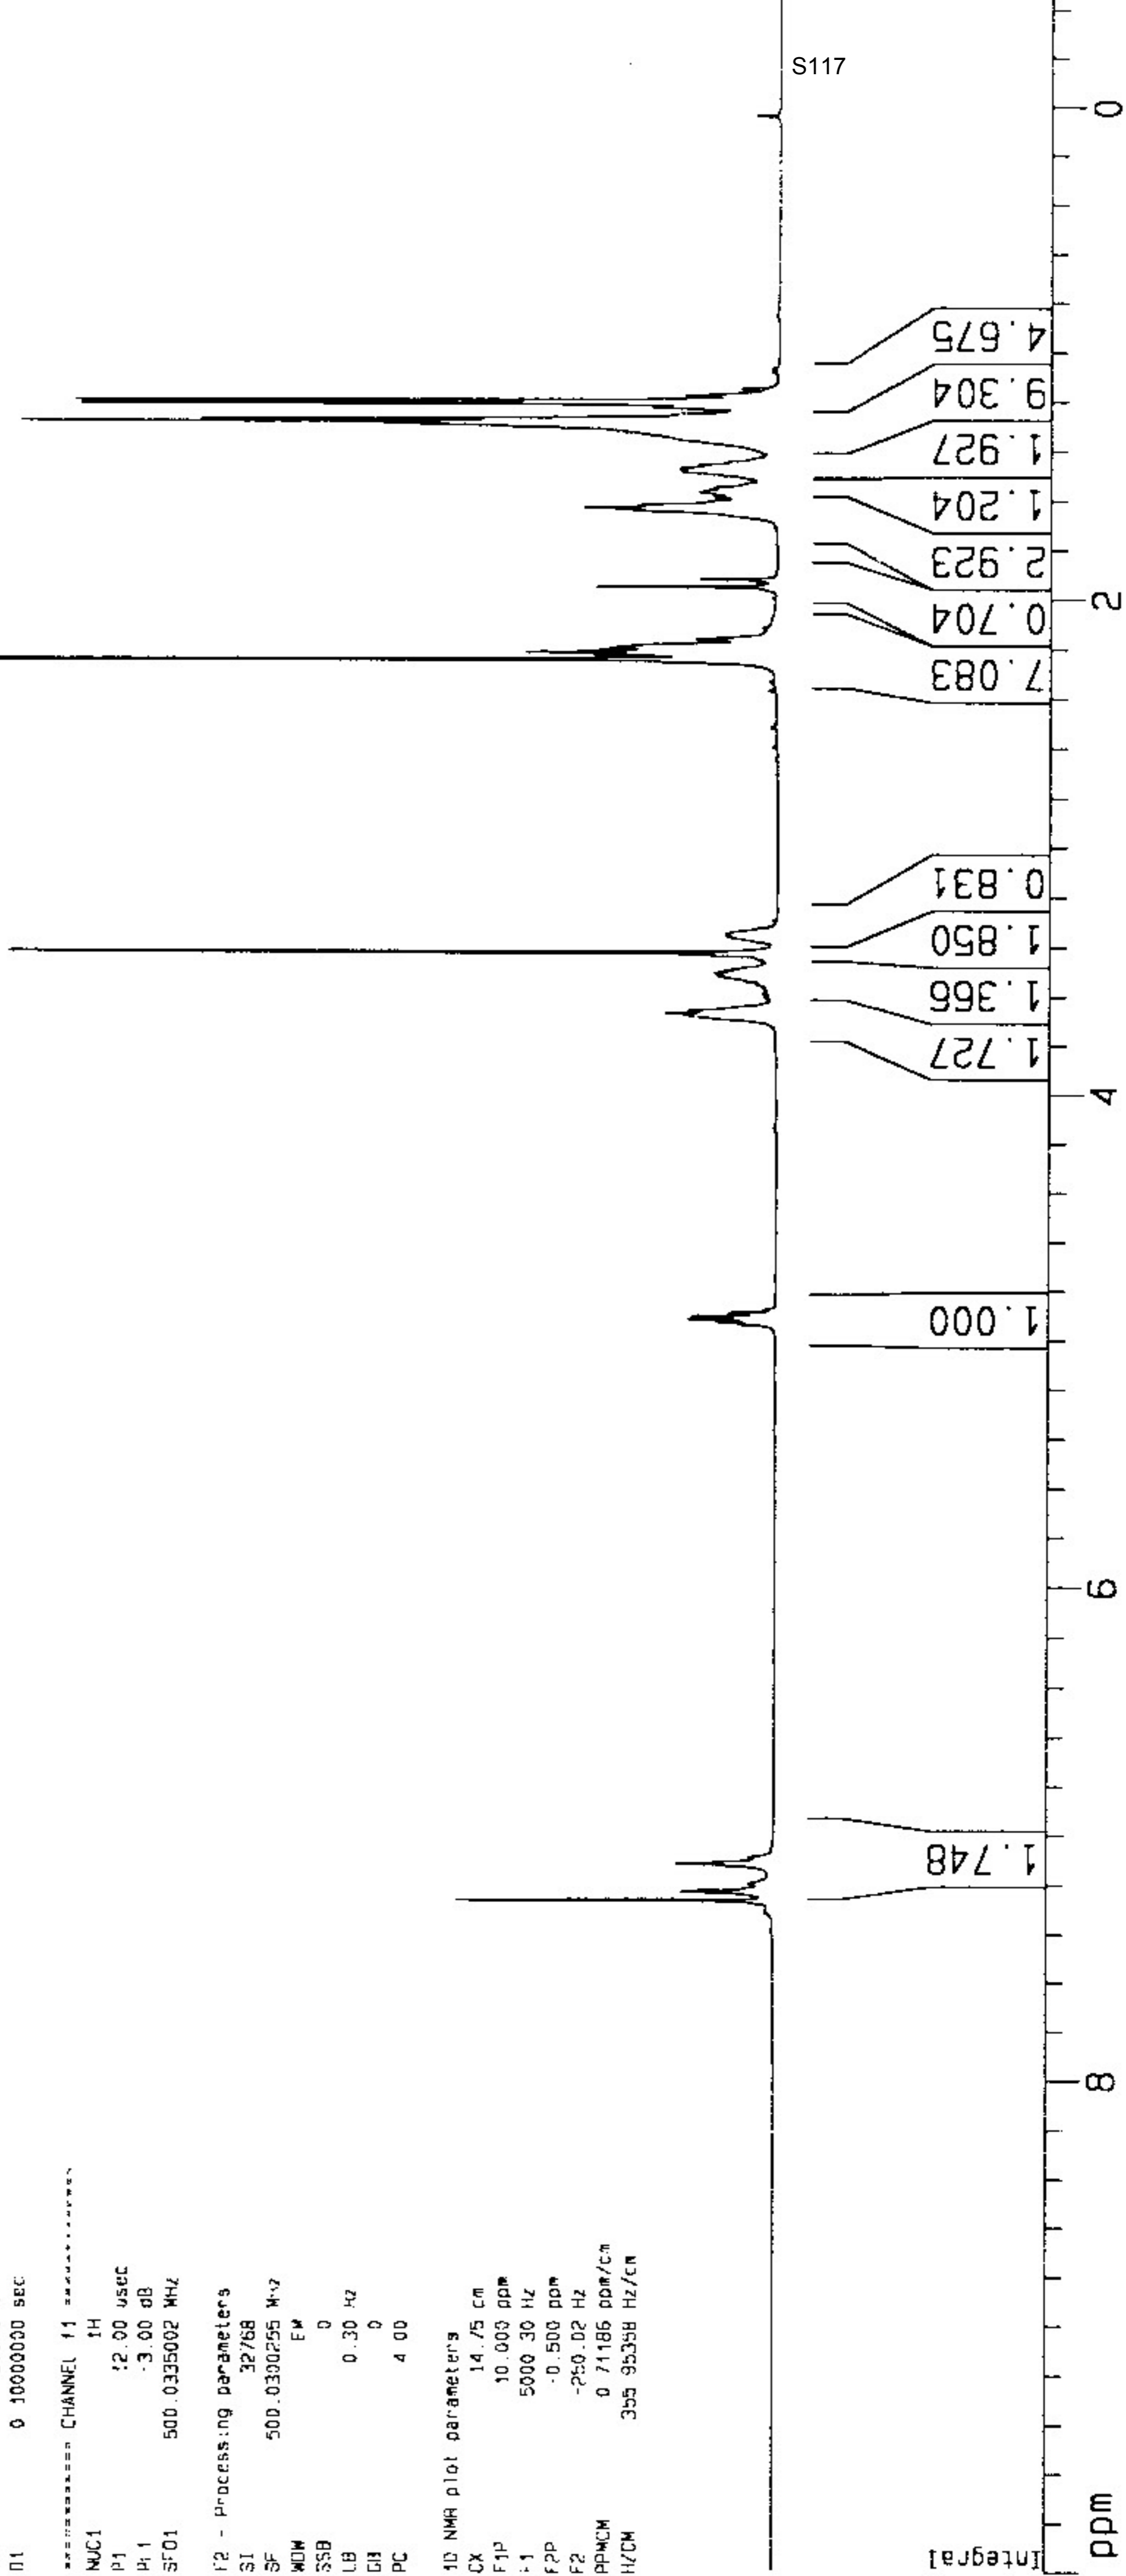



Current Data Parameters  
 USER fcohen  
 NAME tc v 273  
 EXPNO 2  
 PROCNO 1

F2 - Acquisition Parameters  
 Date\_ 20010327  
 Time 12.53  
 INSTRUM gn500  
 PROBHD 5 mm broadban  
 PULPROG zgpg30  
 TD 65536  
 SOLVENT MeOH  
 NS 173  
 DS 2  
 SWH 30303.031 Hz  
 FIDRES 0.462388 Hz  
 AQ 1.0813940 sec  
 RG 3251  
 DM 15.500 usec  
 DE 4.50 usec  
 TE 300.0 K  
 U1 0.25000000 sec  
 U11 0.03000000 sec

----- CHANNEL f1 -----  
 NUC1 13C  
 P1 6.25 usec  
 PL1 0.00 dB  
 SFO1 125.7464486 MHz

----- CHANNEL f2 -----  
 CPDPRG2 waltz16  
 NUC2 1H  
 P2 80.00 usec  
 PL2 -3.00 dB  
 PL12 13.50 dB  
 SFO2 500.0335002 MHz

F2 - Processing parameters  
 SI 65536  
 SF 125.7326579 MHz  
 WDW EM  
 SSB 0  
 FH 1.00 Hz  
 GB 0  
 PC 2.00

3D NMR plot parameters  
 CX 14.75 cm  
 F1P 210.000 ppm  
 F1 26403.86 Hz  
 F2P 0.000 ppm  
 F2 0.00 Hz  
 PPMCM 14.23729 ppm/cm  
 HZCM 1/90.09192 Hz/cm

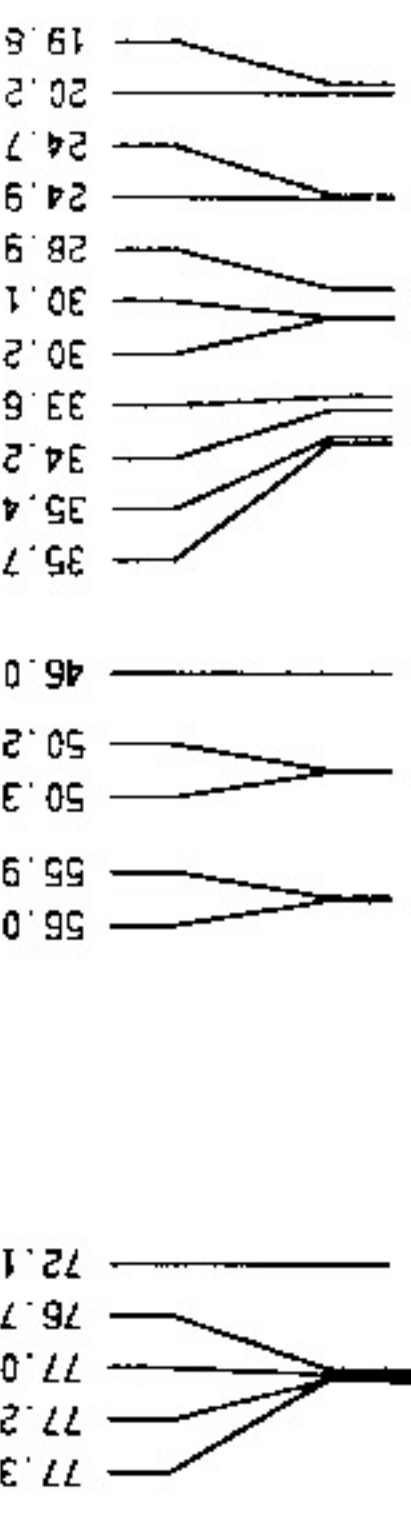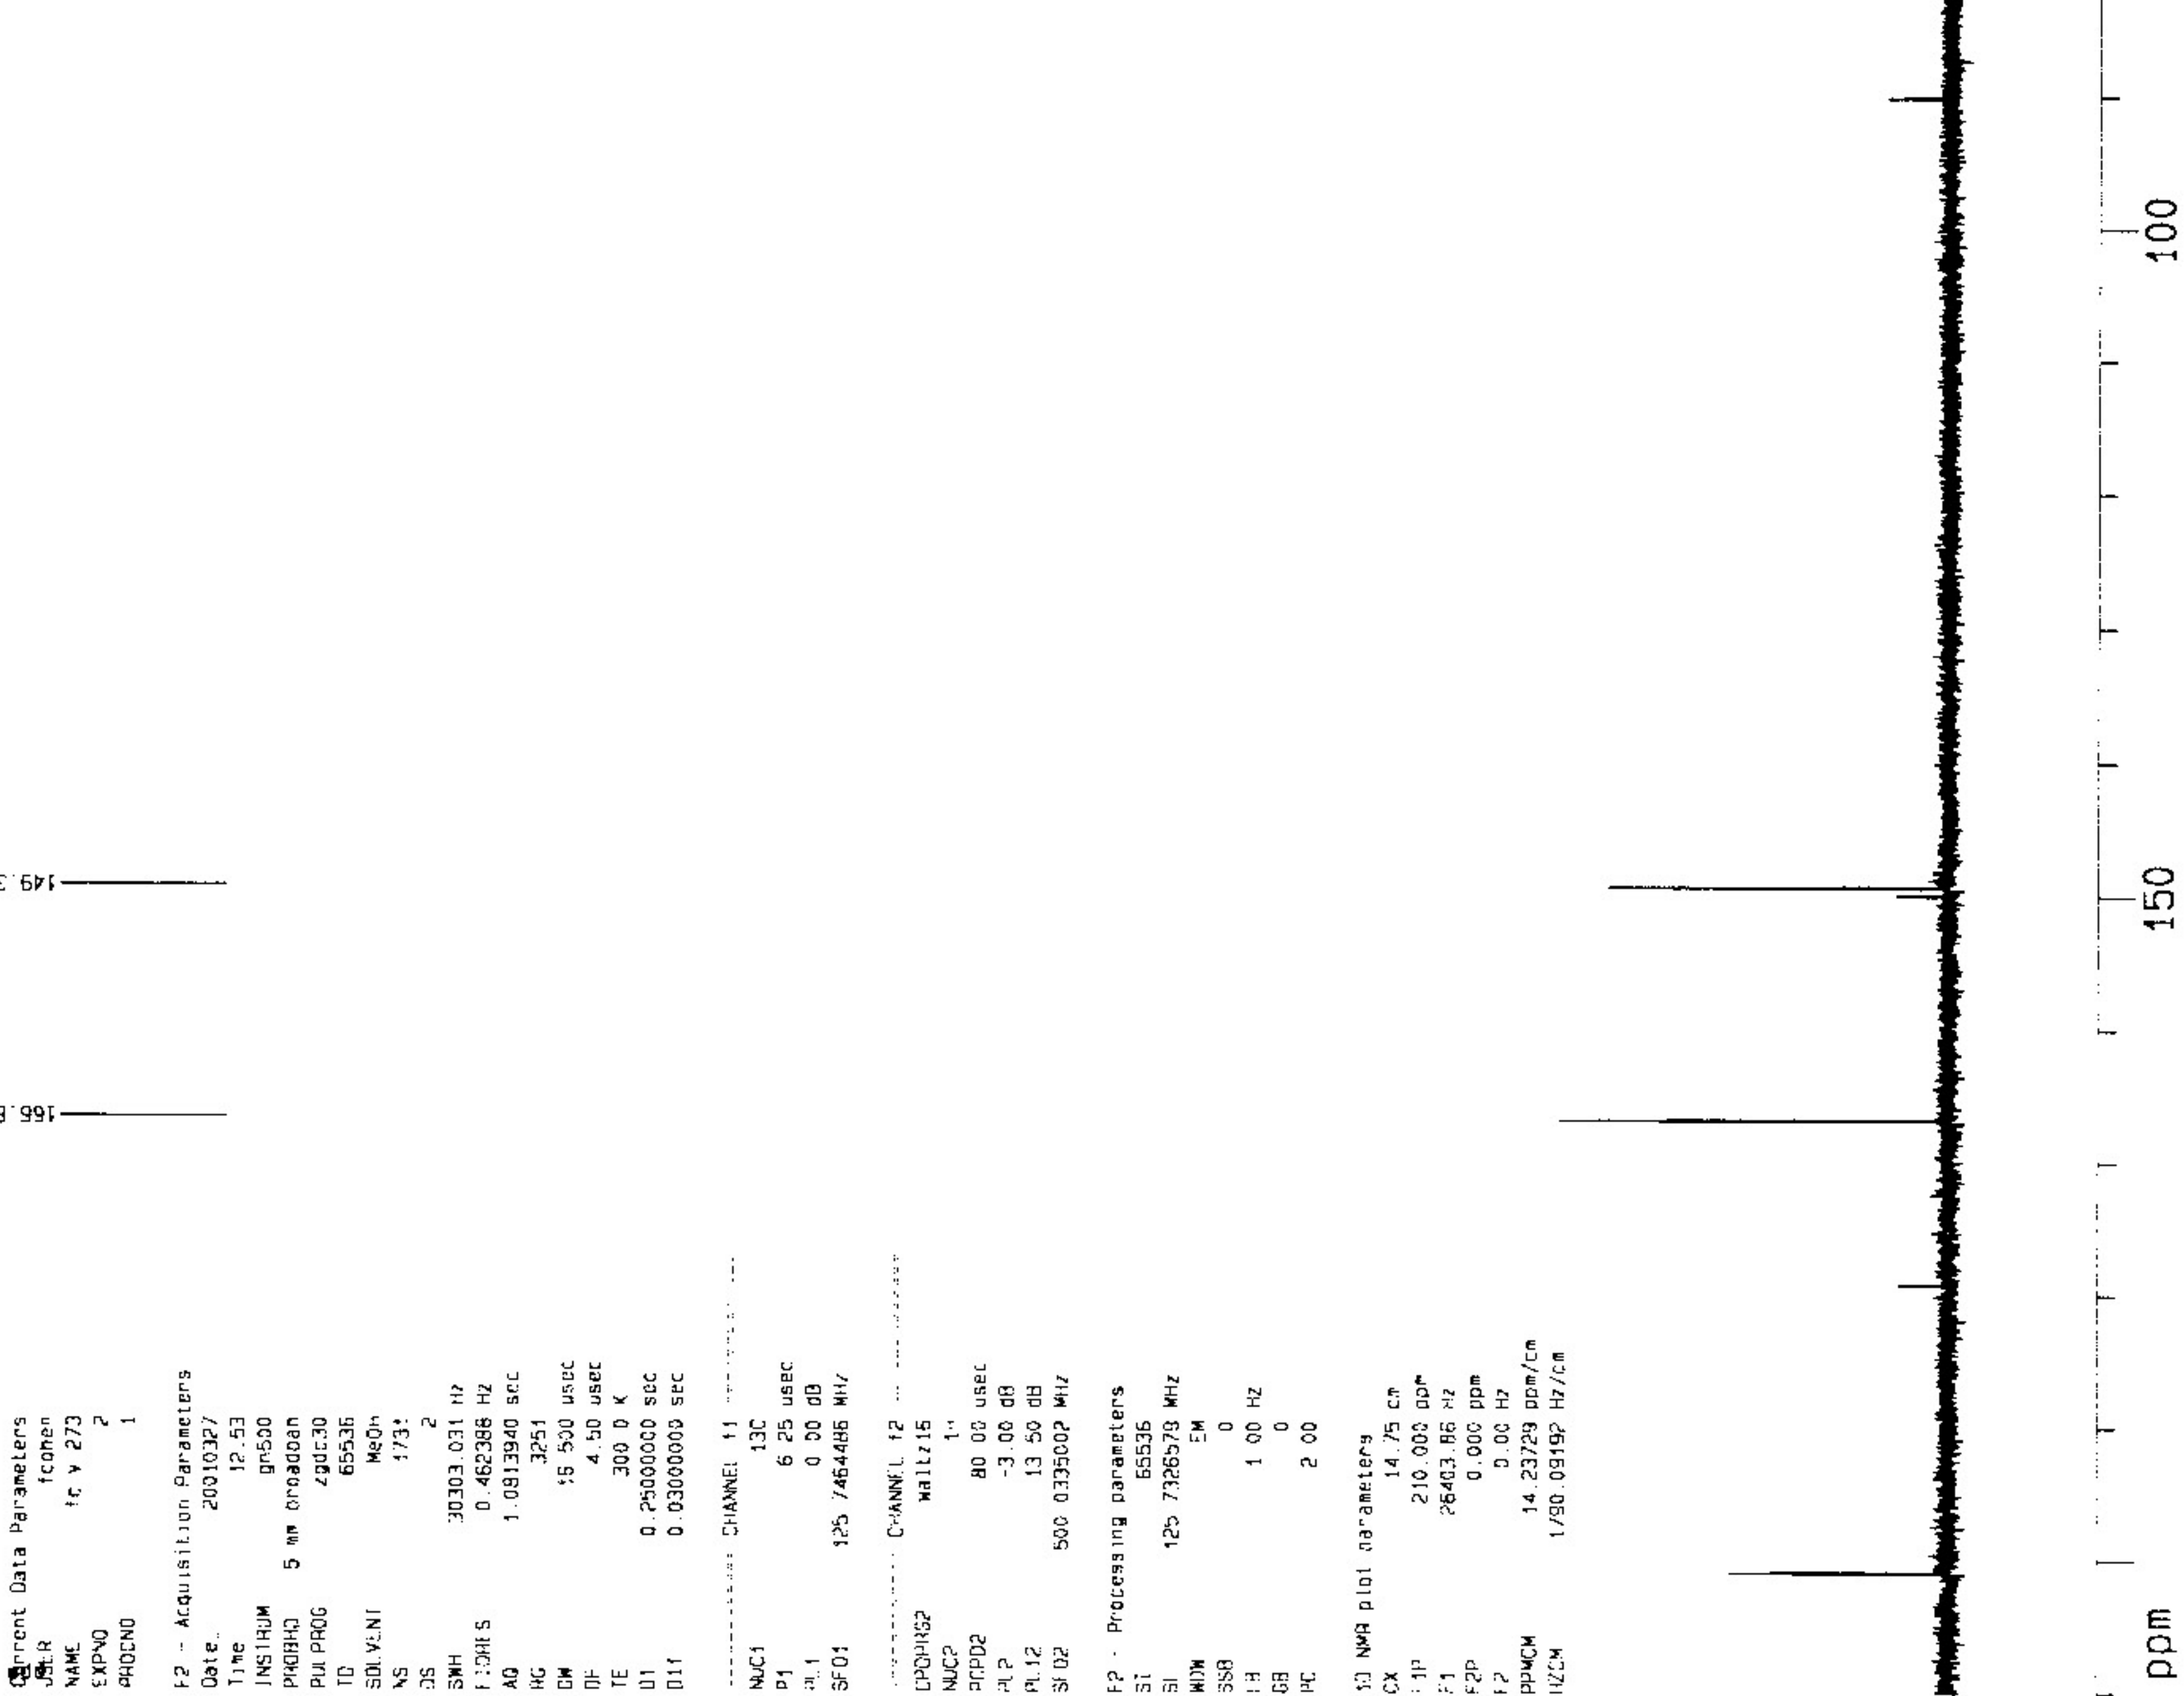

ppm

150

100

50

Current Data Parameters  
 USLR fcohen  
 NAME fc v 275  
 EXPNO 1  
 PRDCND 1

F2 - Acquisition Parameters  
 Date\_ 20010403  
 Time 17.00  
 INSTRUM gn500  
 PULPROG 5 mm broadpu  
 PULPROG zg30  
 TD 65536  
 SOLVENT CDCl3  
 NS 16  
 DS 2  
 SWH 8012.820 Hz  
 FIDRES 0.122266 Hz  
 AQ 4.0894966 sec  
 RG 90.5  
 DM 62.400 usec  
 DE 6.00 usec  
 TE 300.0 K  
 D1 0.10000000 sec

\*\*\*\*\* CHANNEL f1 \*\*\*\*\*  
 NUC1 1H  
 P1 12.00 usec  
 PL1 3.00 dB  
 SFO1 500.0335002 MHz

F2 - Processing Parameters  
 SI 32/68  
 SF 500.0300129 MHz  
 MDW FM  
 SSB 0  
 LB 0.30 Hz  
 GB 0  
 PC 4.00

F2 NMR plot parameters  
 CX 14.75 cm  
 F1P 10.000 ppm  
 F1 5000.30 Hz  
 F2P -0.500 ppm  
 F2 -250.01 Hz  
 PUNCH 0.71186 ppm/cm  
 HZCM 355.85365 Hz/cm

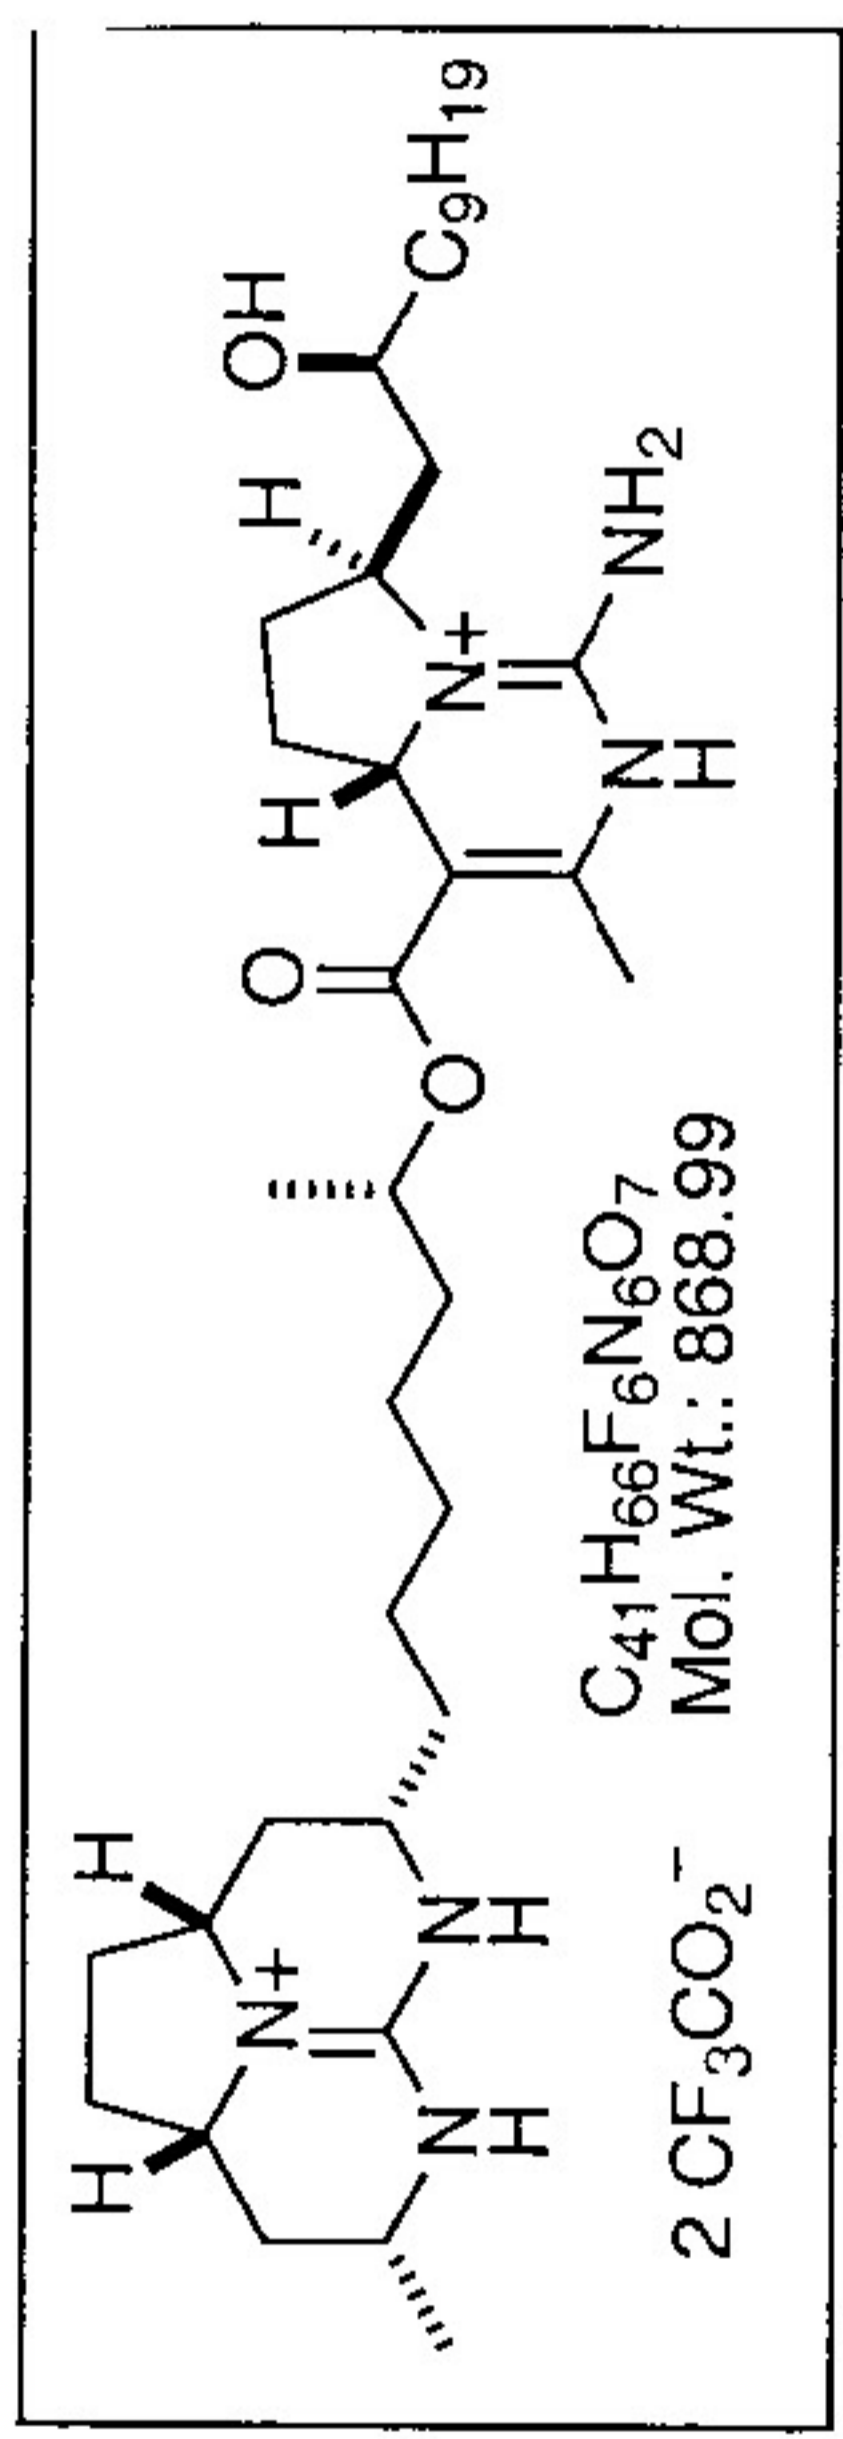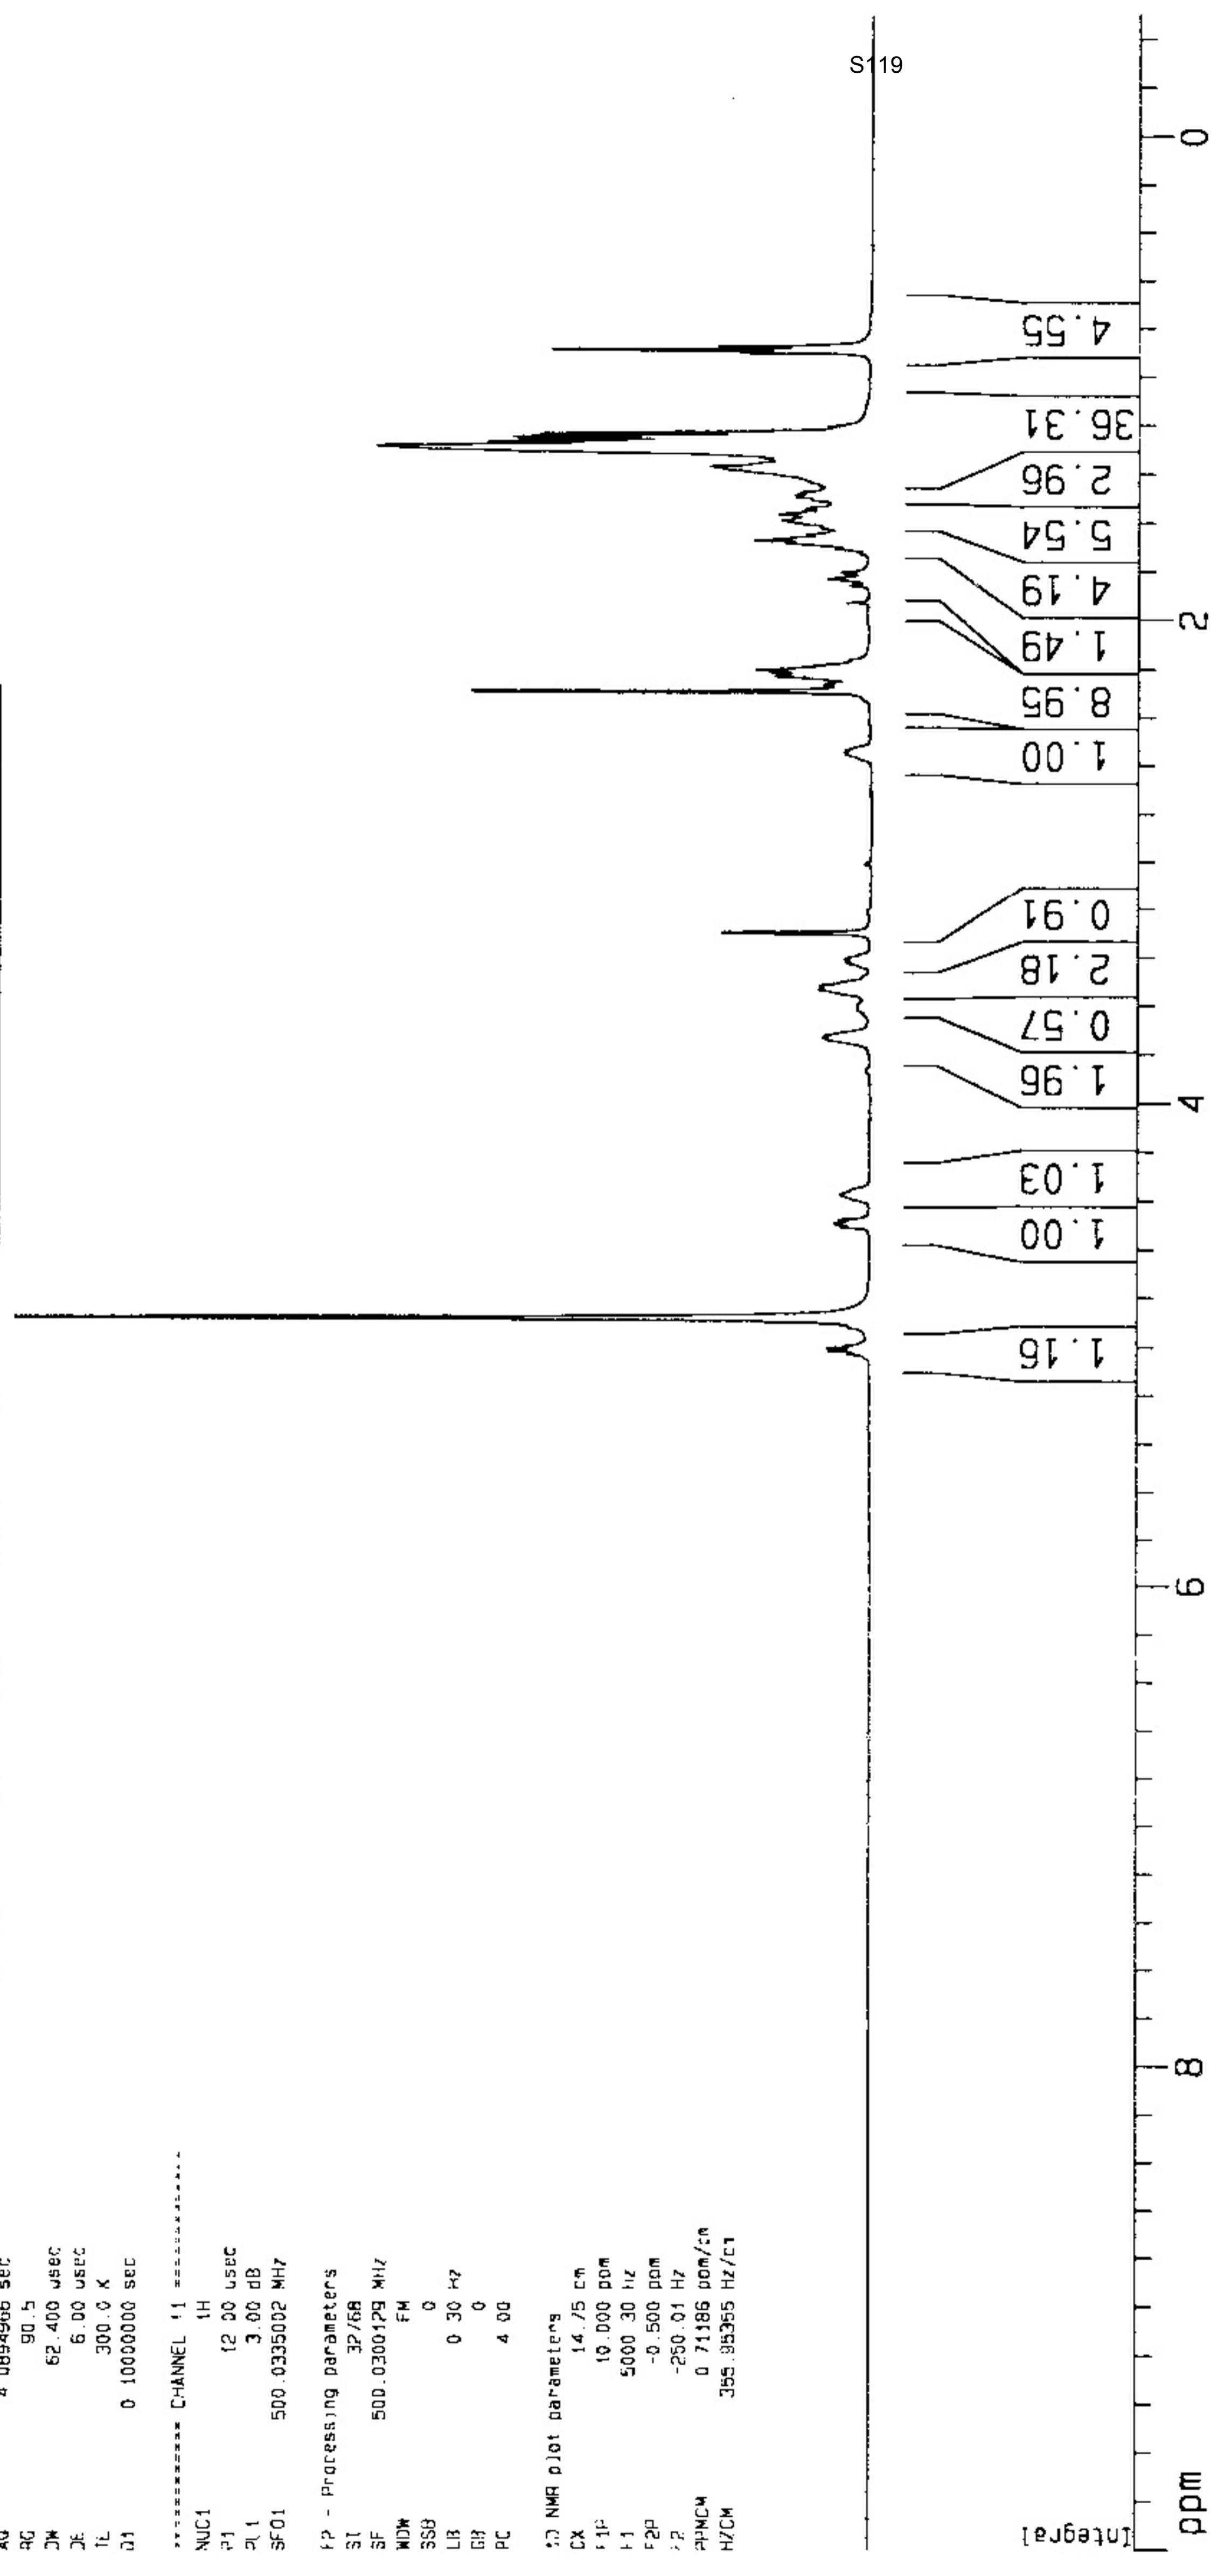

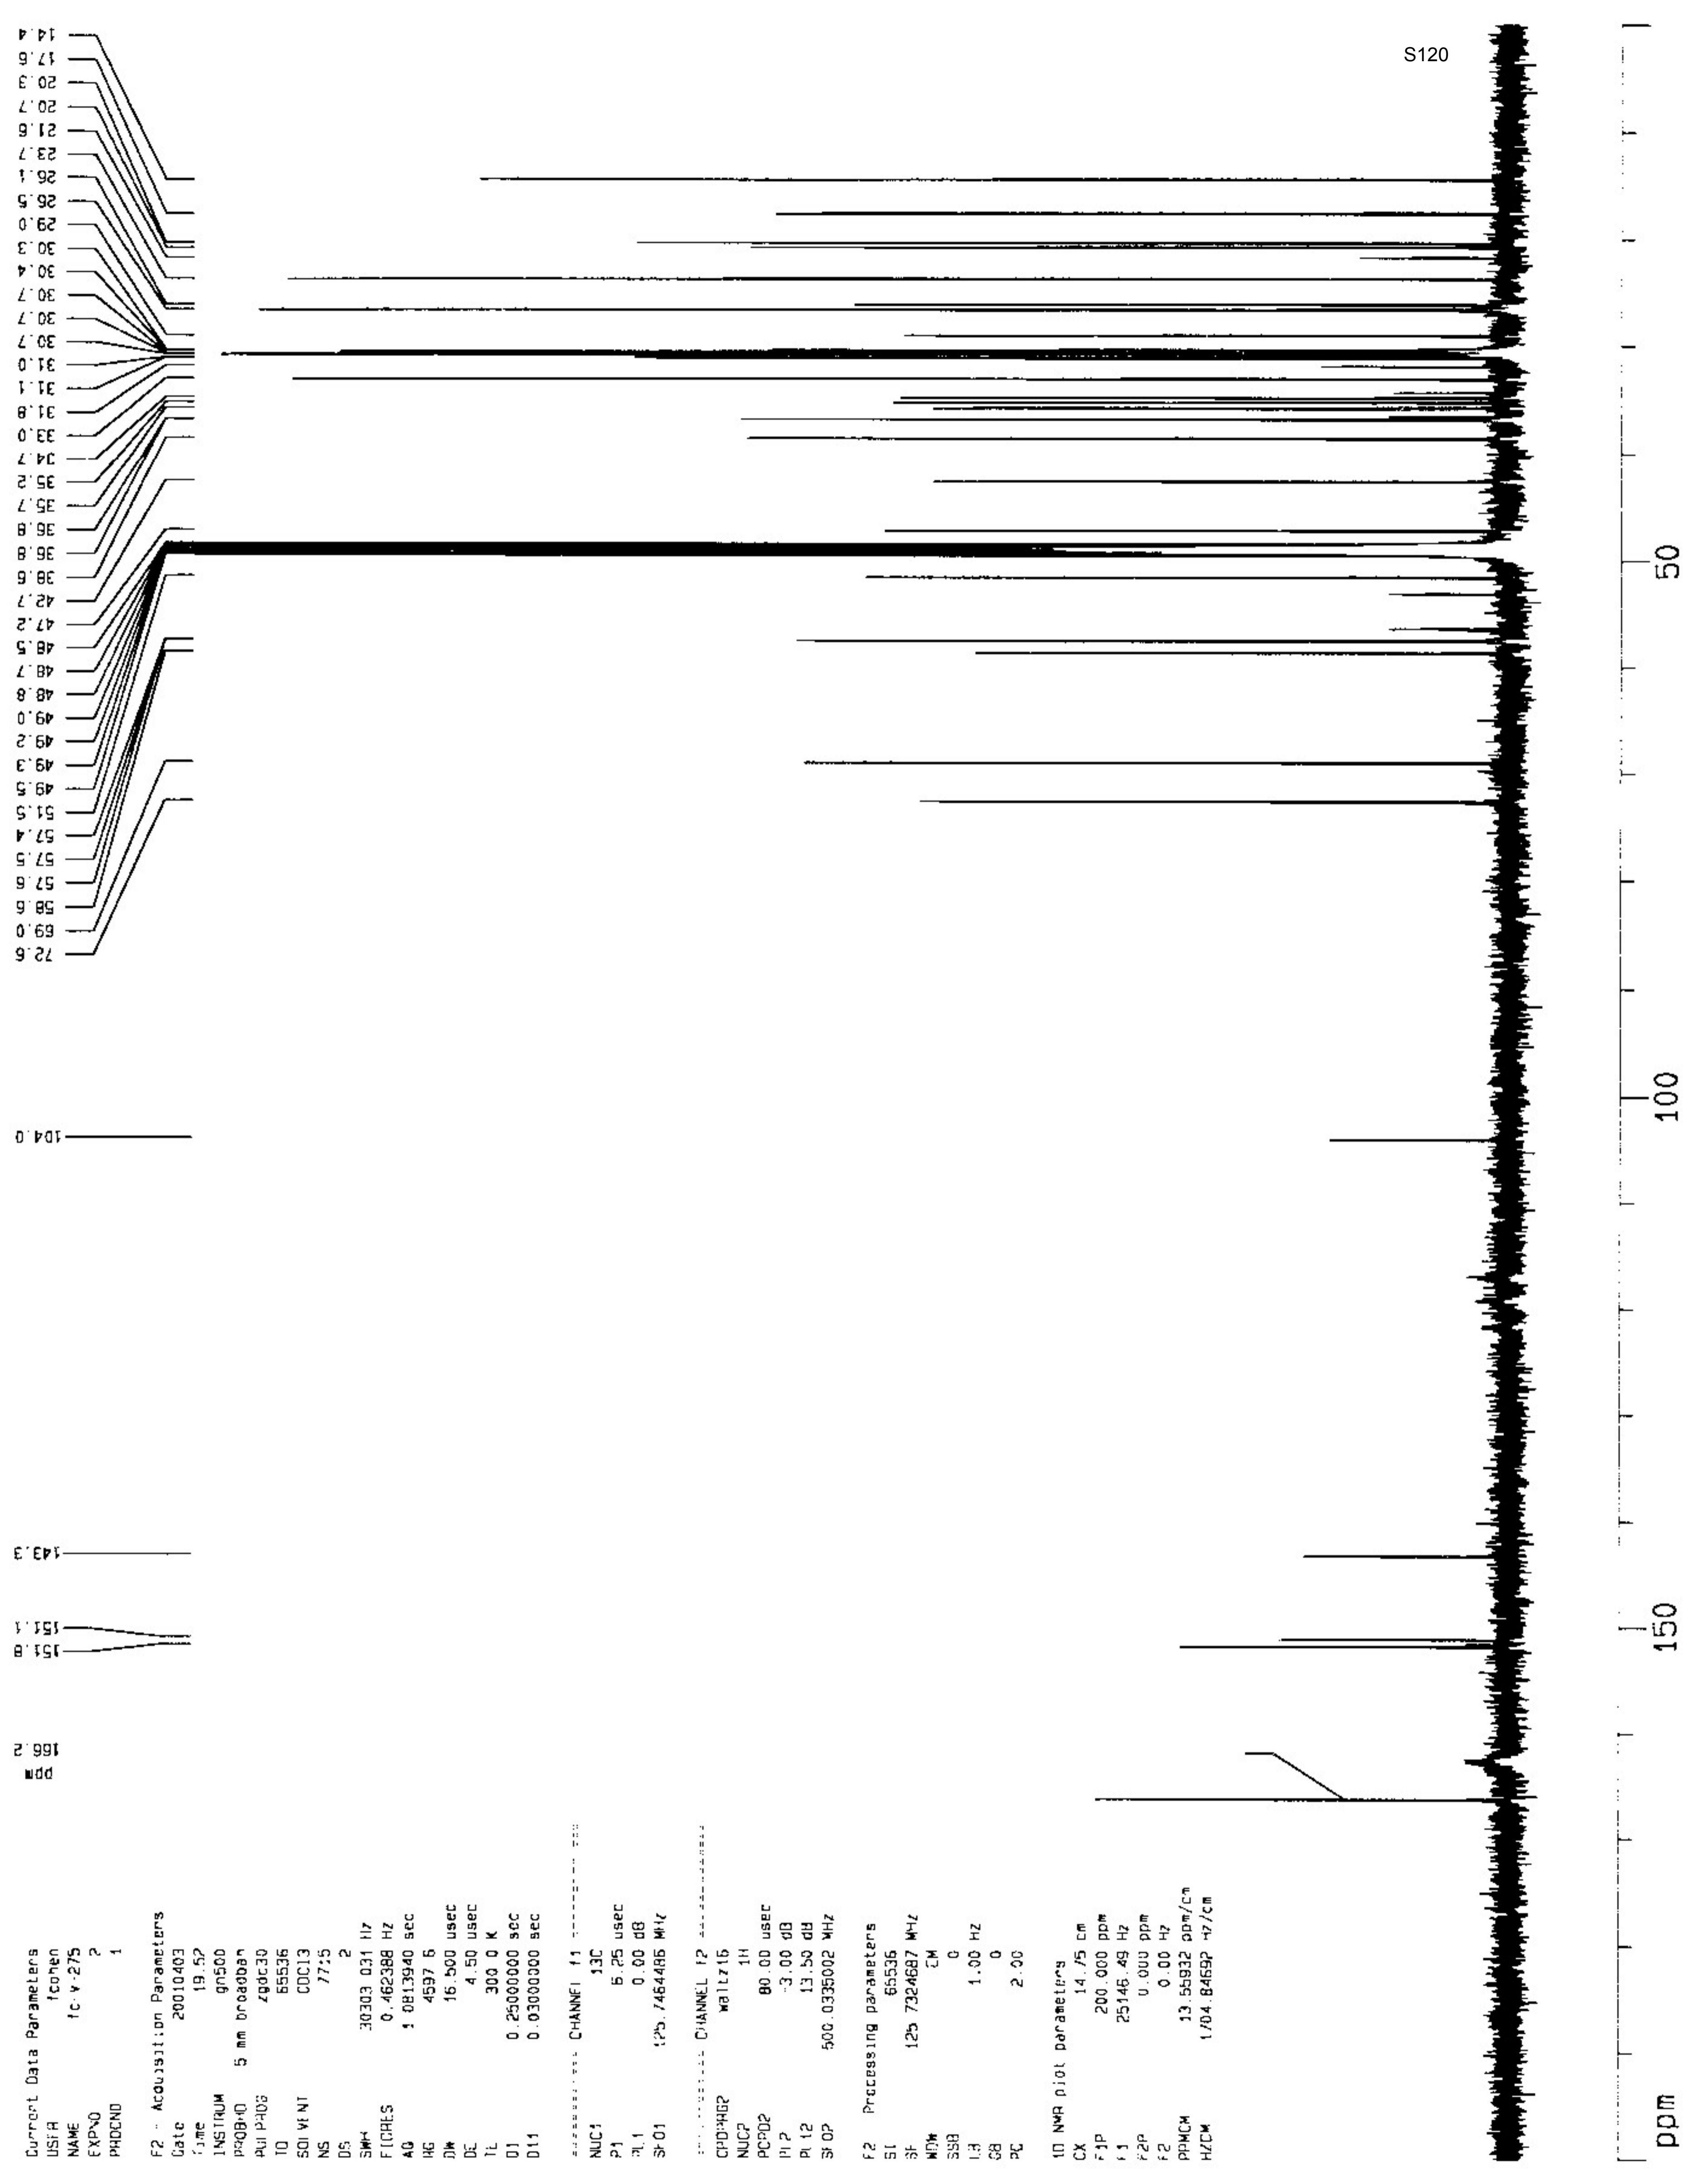

Current Data Parameters  
 USF# fcohen  
 NAME IC-V-275  
 EXPNO 2  
 PROCNO 1

F2 - Acquisition Parameters  
 Date 20010403  
 Time 19.52  
 INSTRUM gn500  
 PQA0 5 mm broadband  
 PULPROG zgpgc30  
 TO 55536  
 SOLVENT CDCl3  
 NS 77:5  
 DS 2  
 SWH 30303.031 Hz  
 FIDRES 0.462388 Hz  
 AQ 1.0813940 sec  
 RG 4597.6  
 DM 16.500 usec  
 DE 4.50 usec  
 TE 300.0 K  
 D1 0.25000000 sec  
 D11 0.03000000 sec

\*\*\*\*\* CHANNEL f1 \*\*\*\*\*  
 NUC1 13C  
 P1 5.25 usec  
 PL1 0.00 dB  
 SF01 125.746485 MHz

\*\*\*\*\* CHANNEL f2 \*\*\*\*\*  
 CPDPRGR waitz16  
 NUC2 1H  
 PCPD2 80.00 usec  
 PL2 -3.00 dB  
 PL12 13.50 dB  
 SF02 500.0335002 MHz

F2 Processing parameters  
 SI 65536  
 SF 125.7324687 MHz  
 WDM CM  
 SSB 0  
 LB 1.00 Hz  
 GB 0  
 PC 2.00

10 NMR pilot parameters  
 CX 14.75 cm  
 F1P 200.000 ppm  
 F1 25146.48 Hz  
 F2P 0.000 ppm  
 F2 0.00 Hz  
 PPMCM 13.55832 ppm/cm  
 HZCM 1704.84692 Hz/cm

14.4  
17.6  
20.3  
20.7  
21.6  
23.7  
26.1  
26.5  
29.0  
30.3  
30.4  
30.7  
30.7  
30.7  
31.0  
31.1  
31.1  
31.8  
33.0  
34.7  
35.2  
35.7  
36.8  
36.8  
36.8  
36.8  
42.7  
47.2  
48.5  
48.7  
48.8  
49.0  
49.2  
49.3  
49.5  
51.5  
57.4  
57.5  
57.6  
58.6  
69.0  
72.6

50

100

150

ppm

Current Data Parameters

USF4 fconan  
 NAME fc v 274  
 FXPND 1  
 PRDCND 1

F2 Acquisition Parameters

Date\_ 20010329  
 Time 18 27  
 INSTRUM omega500  
 PROBHD 5 mm Broadban  
 PULPROG zg30  
 ID 65536  
 SOLVENT CDCl3  
 NS 32  
 DS 2  
 SWH 8012.620 Hz  
 FIDRFS 0.22266 Hz  
 AQ 4.0894966 sec  
 RG 287.4  
 DM 62.400 usec  
 DF 6.00 usec  
 IE 300.0 K  
 QT 0.1000000 sec

\*\*\*\*\* CHANNEL f1 \*\*\*\*\*

NUC1 1H  
 P1 14.00 usec  
 P2 0.00 dB  
 SF01 500.2235015 MHz

F2 - Processing parameters

SI 55536  
 SF 500.220190 MHz  
 WDM EM  
 SSB 0  
 LB 0.30 Hz  
 GB 0  
 PC 1.00

1D NMR plot parameters

CX 14.75 cm  
 F1 10.000 ppm  
 F2 5002.20 Hz  
 F2P -0.500 ppm  
 F2 250.11 Hz  
 F2MCM 0.71186 ppm/cm  
 F2CM 355.08884 Hz/cm

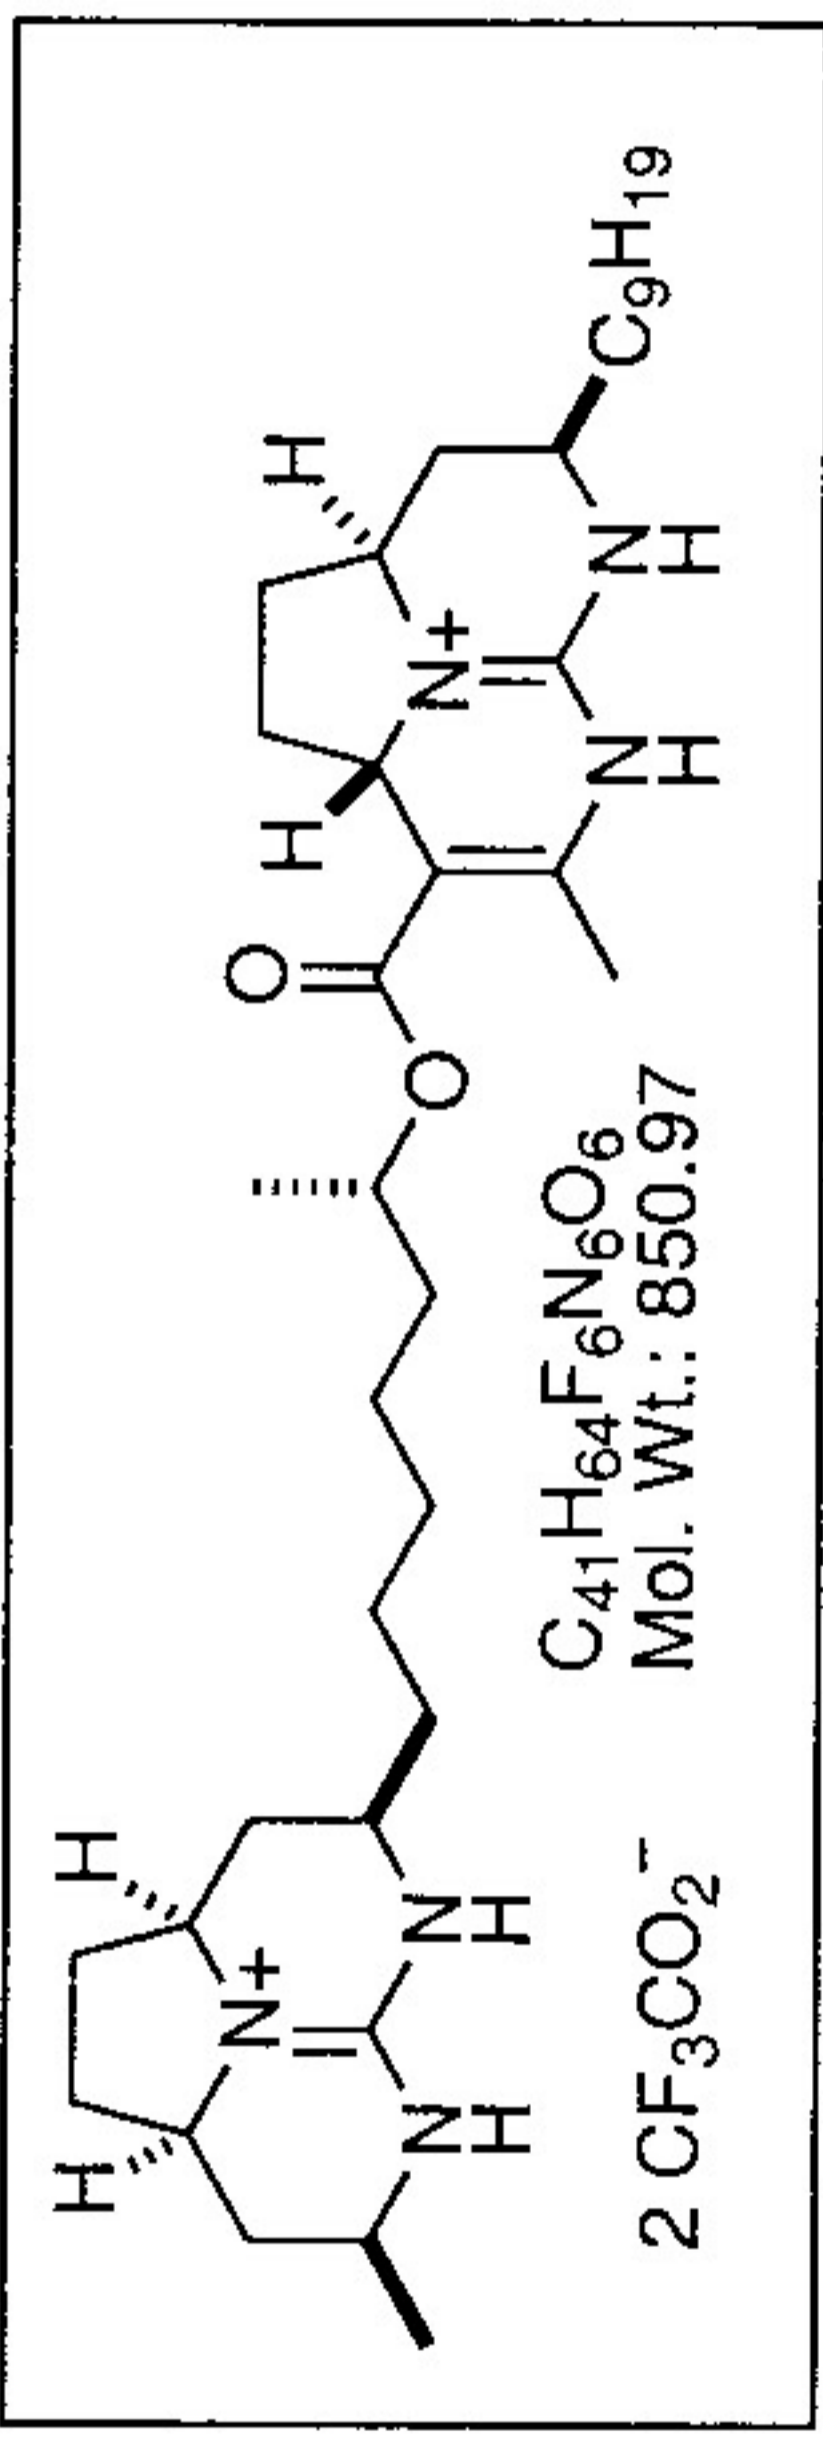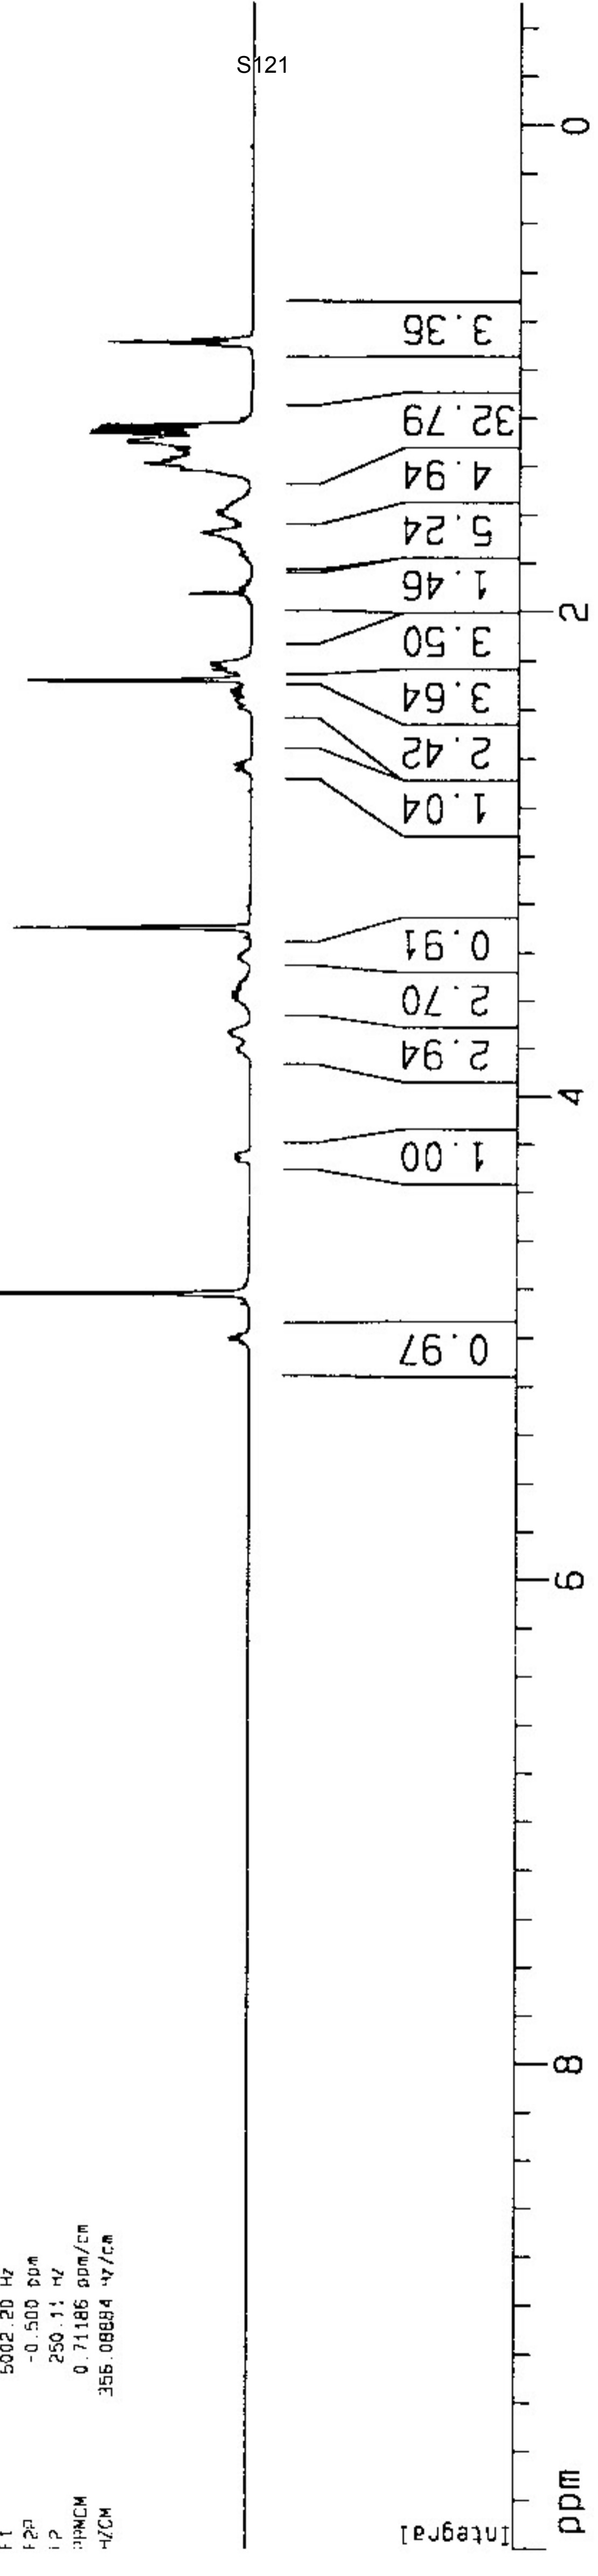

S121

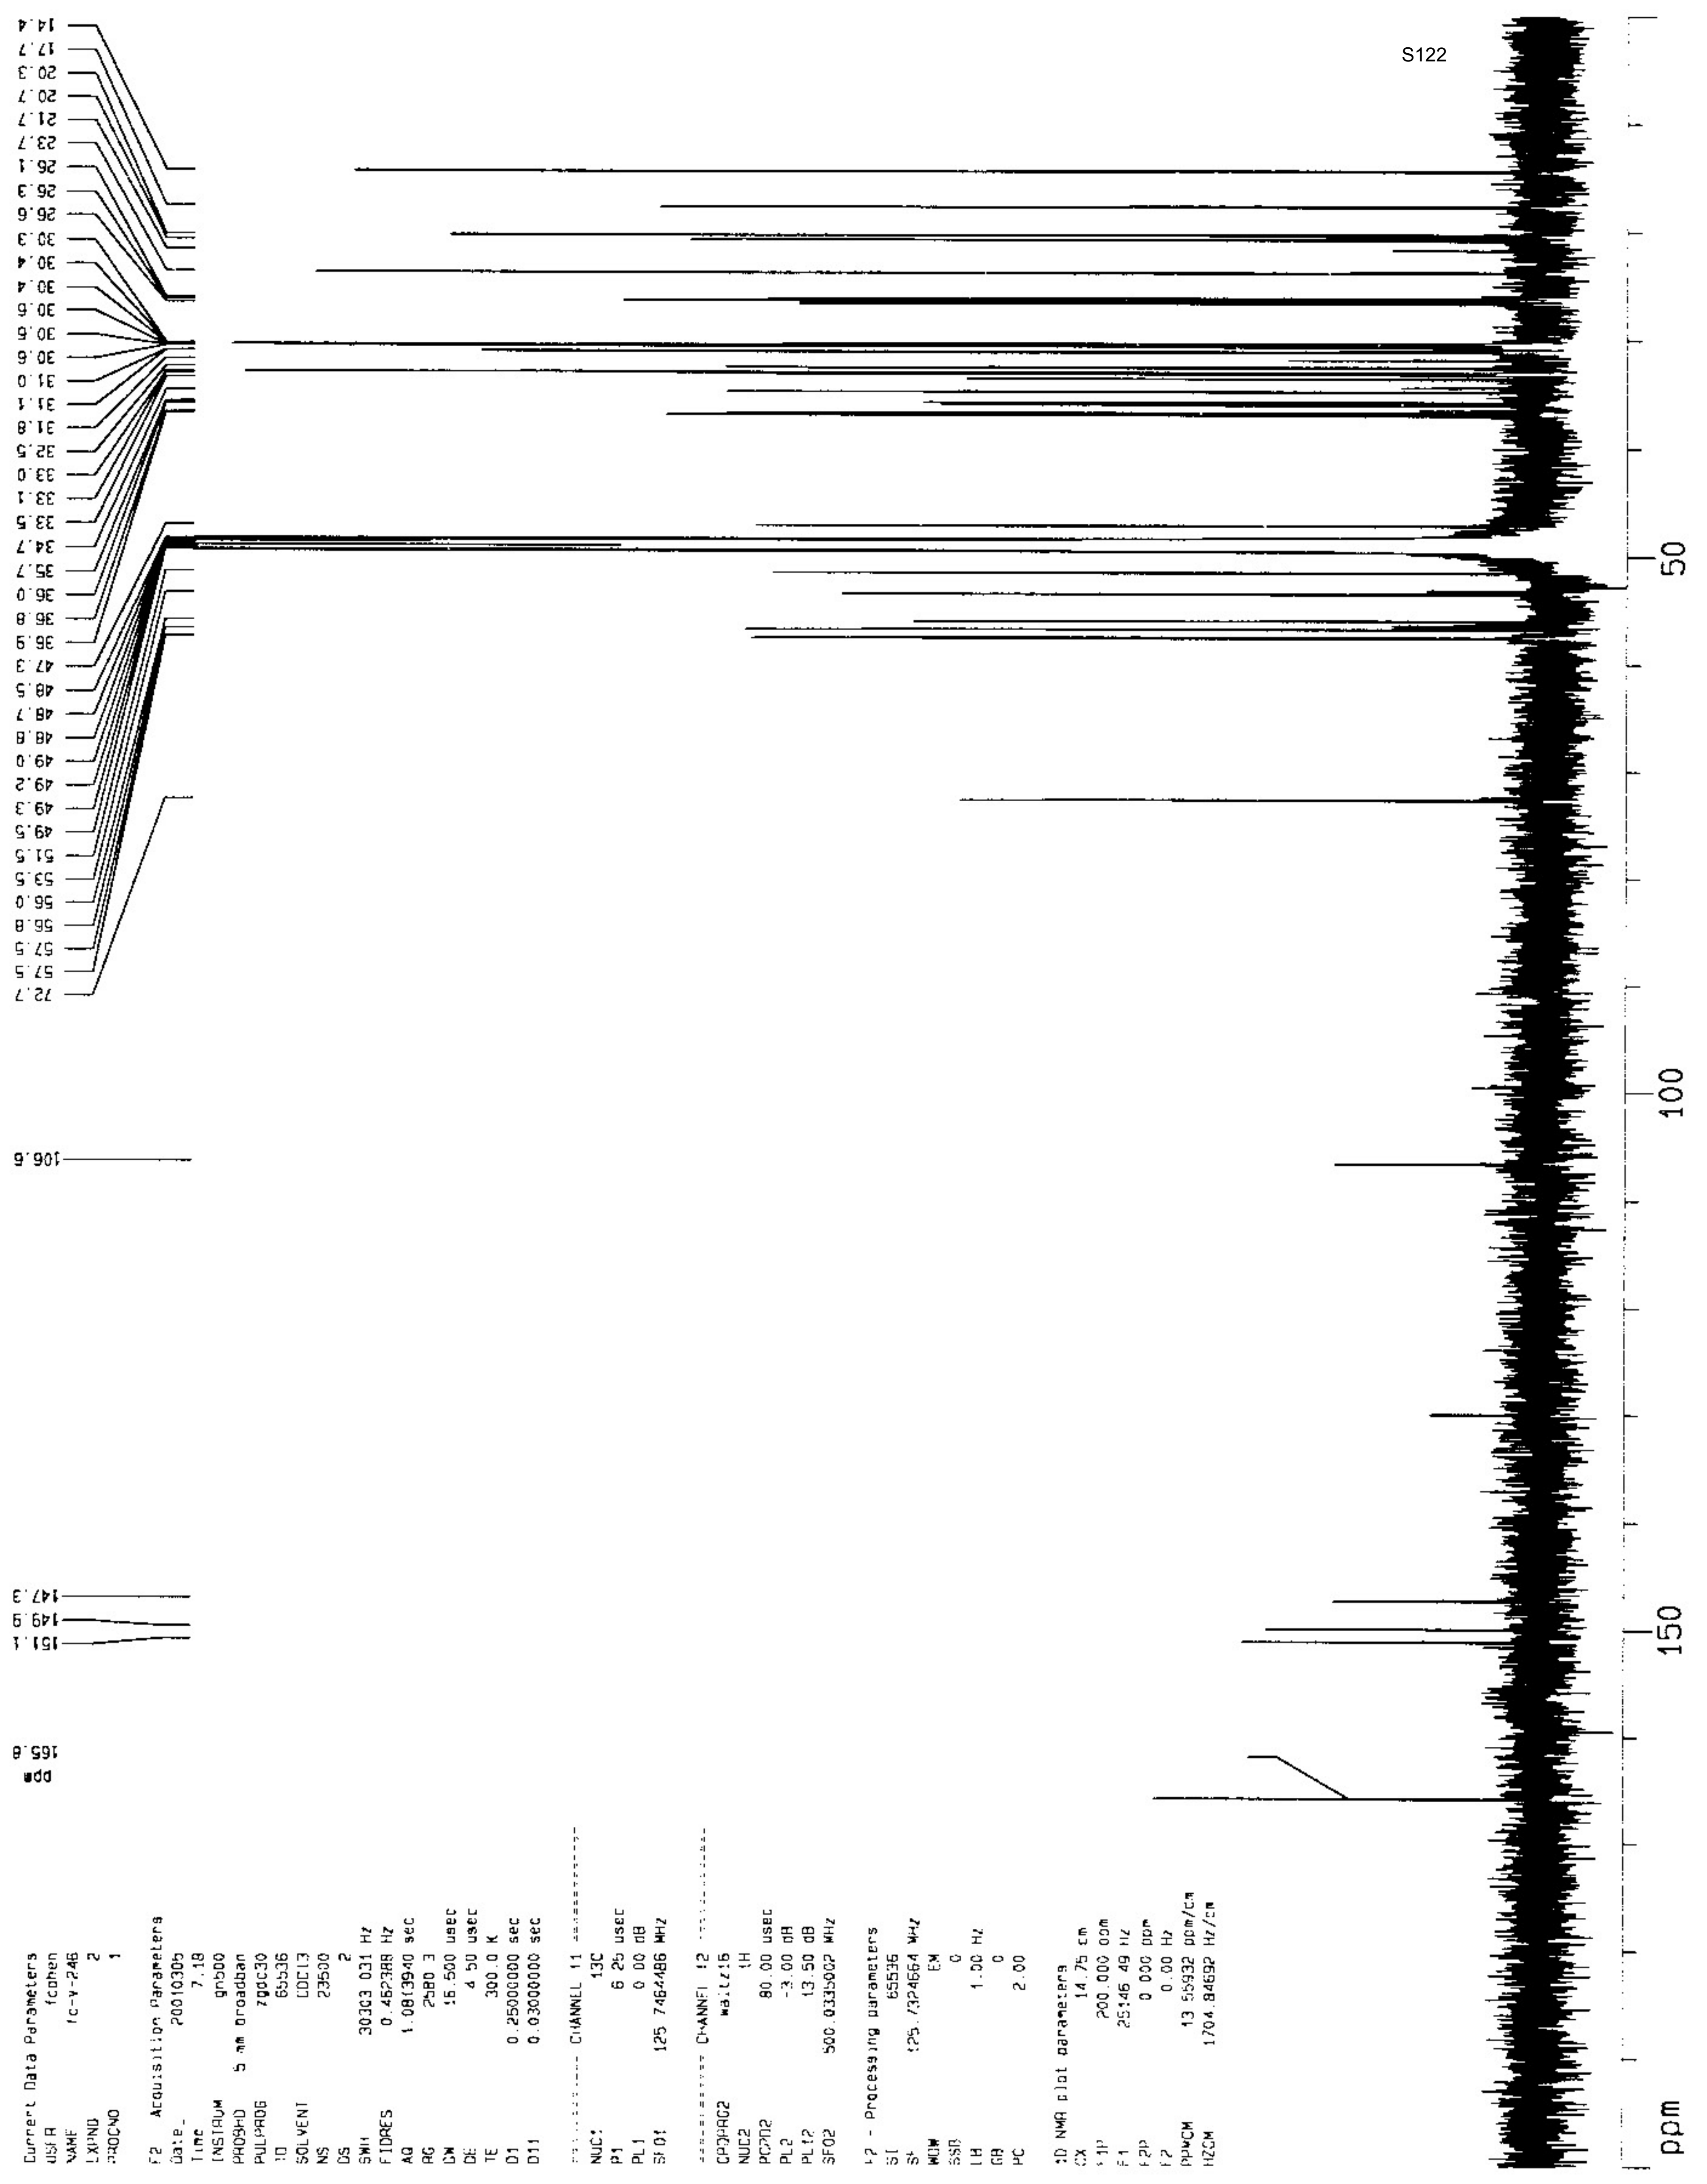

Current Data Parameters  
 USR R fcben  
 NAME fc-v-246  
 LXPND 2  
 PROCNO 1

F2 Acquisition Parameters  
 Date\_ 20010305  
 Time 7.18  
 INSTRUM gnb00  
 PROBHD 5 mm broadband  
 PULPROG zgpg30  
 TO 65536  
 SOLVENT CDCl3  
 NS 23500  
 DS 2  
 SWH 30303.031 Hz  
 FIDRES 0.462388 Hz  
 AQ 1.0813940 sec  
 RG 2580.3  
 DM 16.500 usec  
 DE 4.50 usec  
 TE 300.0 K  
 D1 0.25000000 sec  
 D11 0.03000000 sec

----- CHANNEL 11 -----  
 NUC1 13C  
 P1 6.25 usec  
 PL1 0.00 dB  
 SF01 125.7464486 MHz

----- CHANNEL 12 -----  
 CPDPRG2 waltz16  
 NUC2 1H  
 PCPD2 80.00 usec  
 PL2 -3.00 dB  
 PL12 13.50 dB  
 SF02 500.0335002 MHz

F2 - Processing parameters  
 SI 65536  
 SF 125.7324664 MHz  
 WDW EM  
 SSB 0  
 LB 1.00 Hz  
 GB 0  
 PC 2.00

3D NMR plot parameters  
 CX 14.75 cm  
 S1P 200.000 00m  
 F1 25146.49 Hz  
 F2 0.000 ppm  
 F2 0.00 Hz  
 PPMCM 13.55932 ppm/cm  
 HZCM 1704.84692 Hz/cm

106.6  
 147.3  
 149.9  
 151.1  
 165.8  
 17.7  
 14.4  
 20.3  
 20.7  
 21.7  
 23.7  
 26.1  
 26.3  
 26.6  
 30.3  
 30.4  
 30.4  
 30.6  
 30.6  
 30.6  
 31.0  
 31.1  
 31.8  
 32.5  
 33.0  
 33.1  
 33.5  
 34.7  
 35.7  
 36.0  
 36.8  
 36.9  
 36.9  
 47.3  
 48.5  
 48.7  
 48.8  
 49.0  
 49.2  
 49.3  
 49.5  
 51.5  
 53.5  
 56.0  
 56.8  
 57.5  
 57.5  
 72.7

ppm 150 100 50

Current Data Parameters  
 USER fcohen  
 NAME fc-y-2/9  
 EXPNO 1  
 PROCNO 1

F2 - Acquisition Parameters  
 Date 20010417  
 Time 17.02  
 INSTRUM gn500  
 PROBHD 5 mm broadban  
 PULPROG zg30  
 TO 65536  
 SOLVENT CDCl3  
 NS 24  
 DS 2  
 SWH 8012.820 Hz  
 FIDHLS 0.122266 Hz  
 AQ 4.0894966 sec  
 RG 203.2  
 DM 62.400 usec  
 DL 5.00 usec  
 TE 300.0 K  
 D1 0.10000000 sec

----- CHANNEL f1 -----  
 NUC1 1H  
 P1 12.00 usec  
 PL1 -3.00 dB  
 SF01 500.0335002 MHz

F2 - Processing parameters  
 SI 32768  
 SF 500.0300129 MHz  
 NDM 5M  
 SSB 0  
 LB 0.30 Hz  
 GB 0  
 PC 4.00

1D NMR plot parameters  
 CX 14.75 cm  
 F1P 10.000 ppm  
 F1 50000.30 Hz  
 F2P 0.500 ppm  
 F2 -750.01 Hz  
 PPMCM 0.71186 ppm/cm  
 HZCM 355.95355 Hz/cm

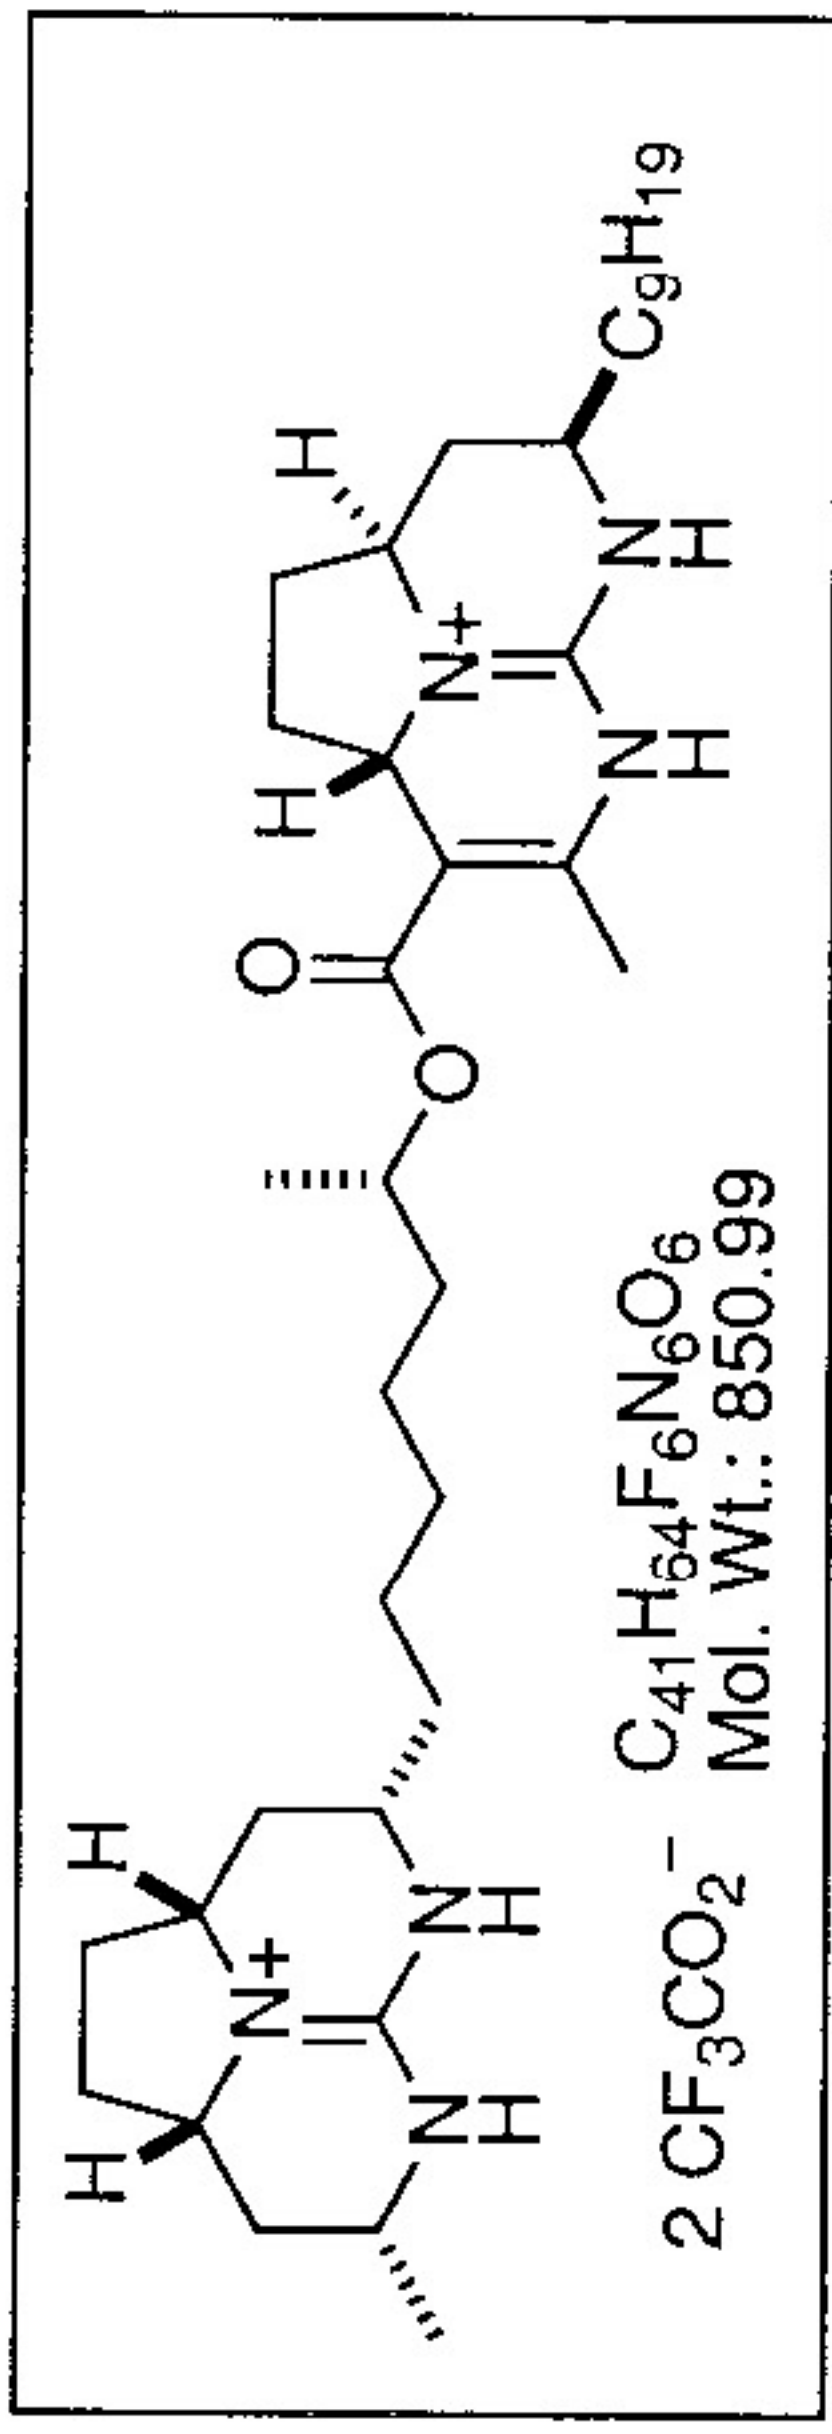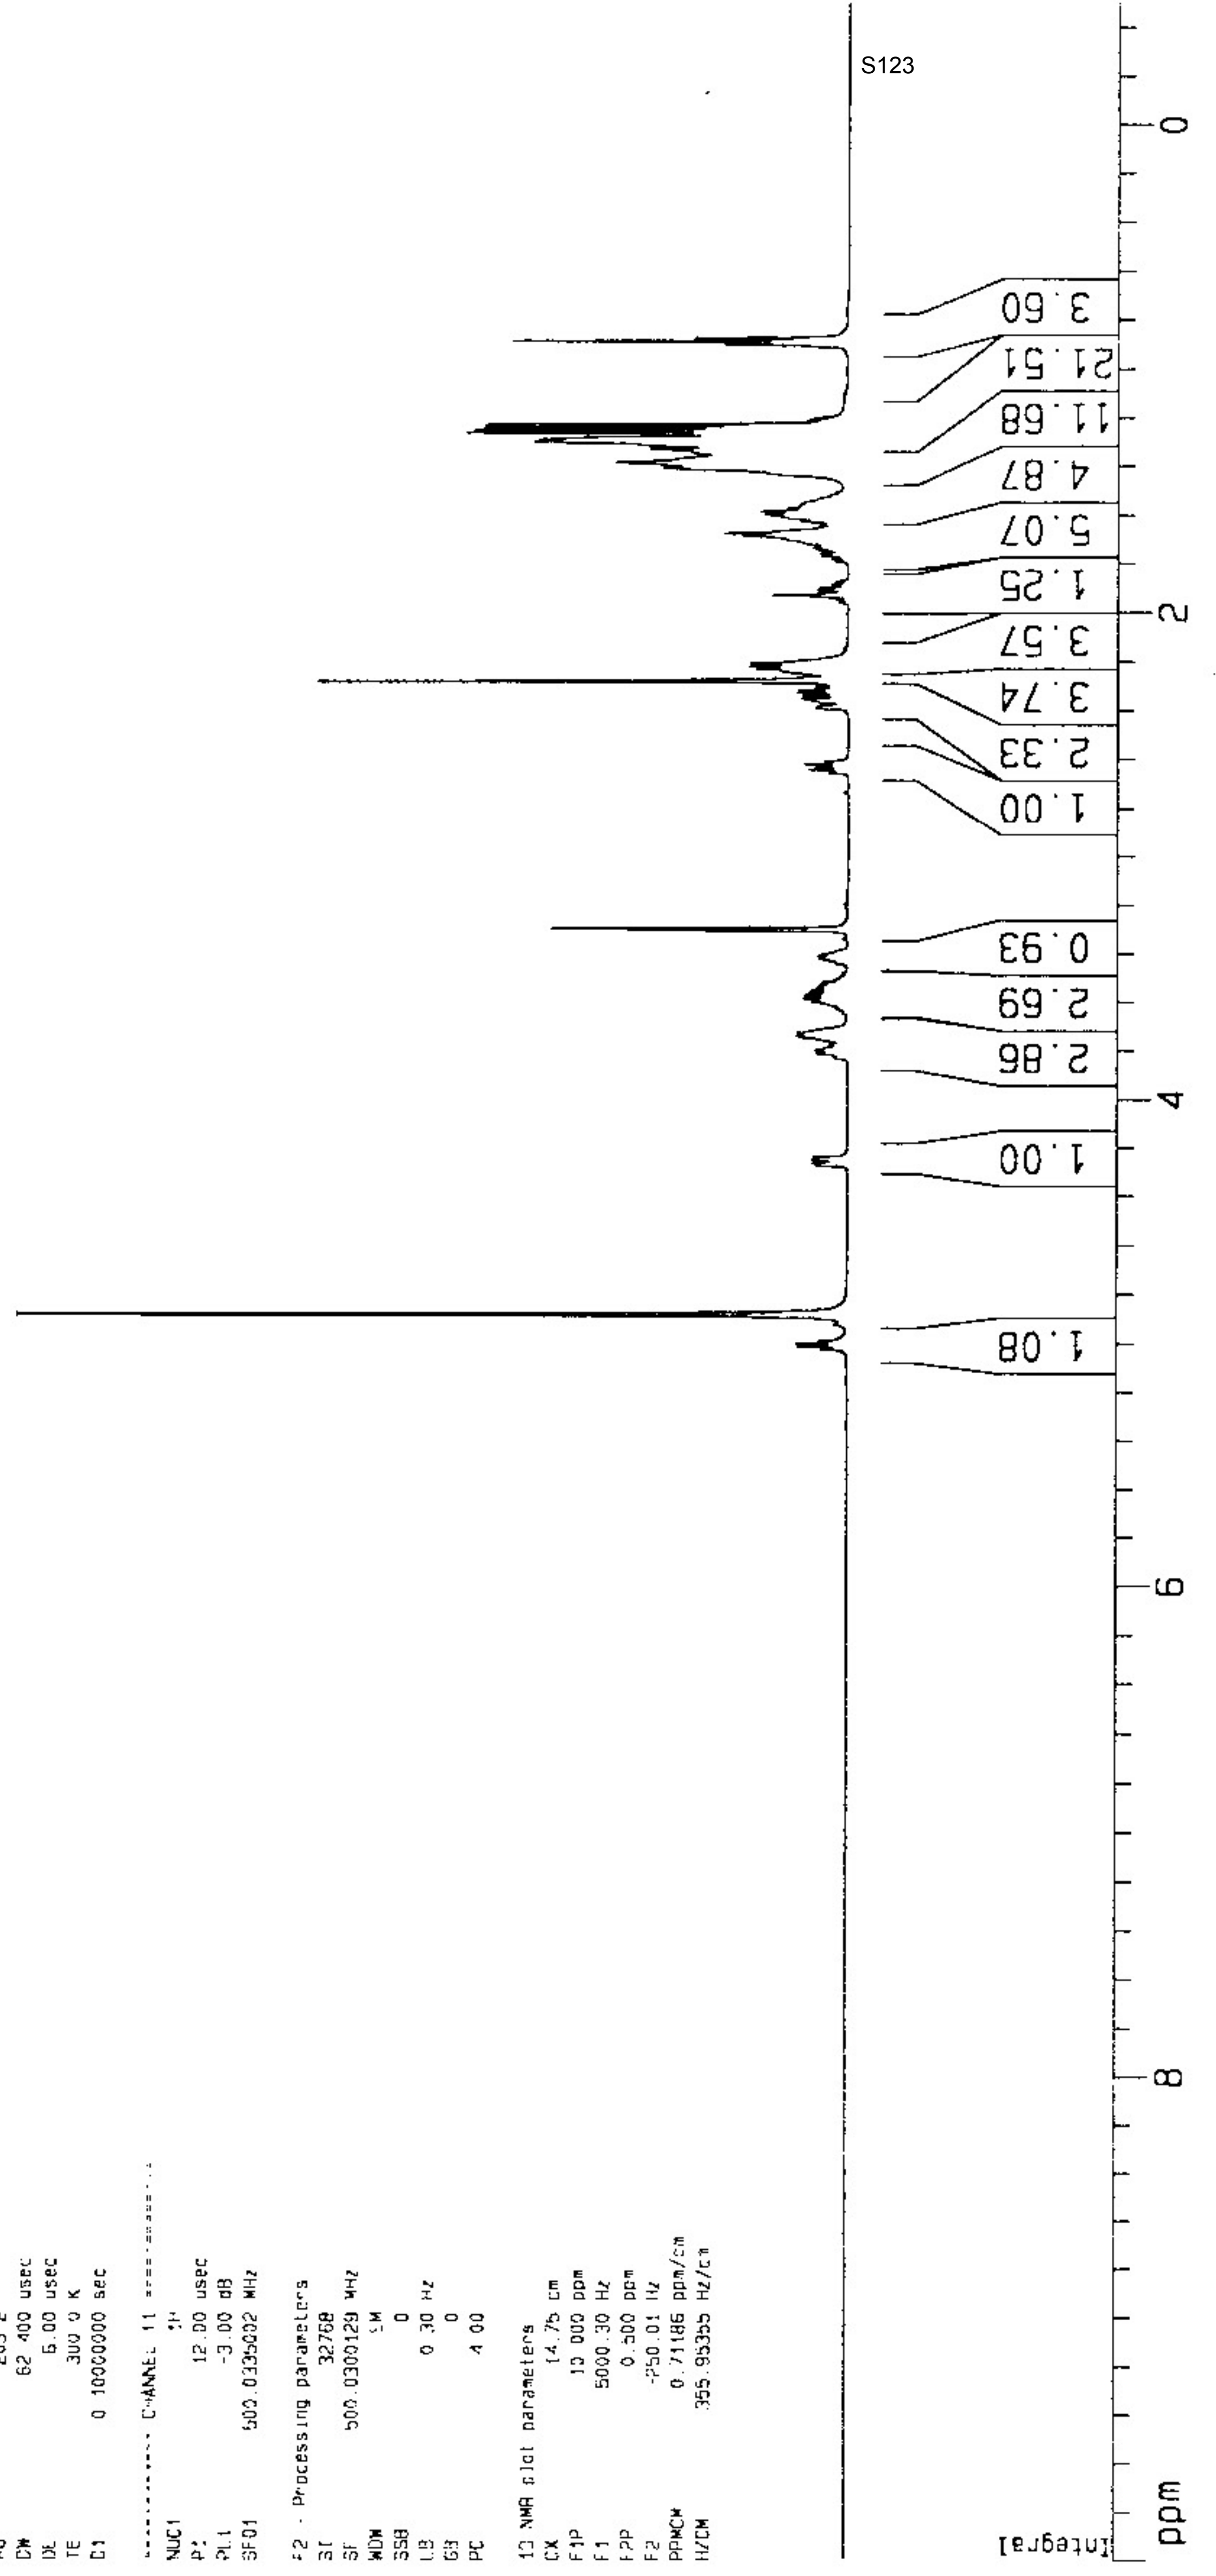

S123

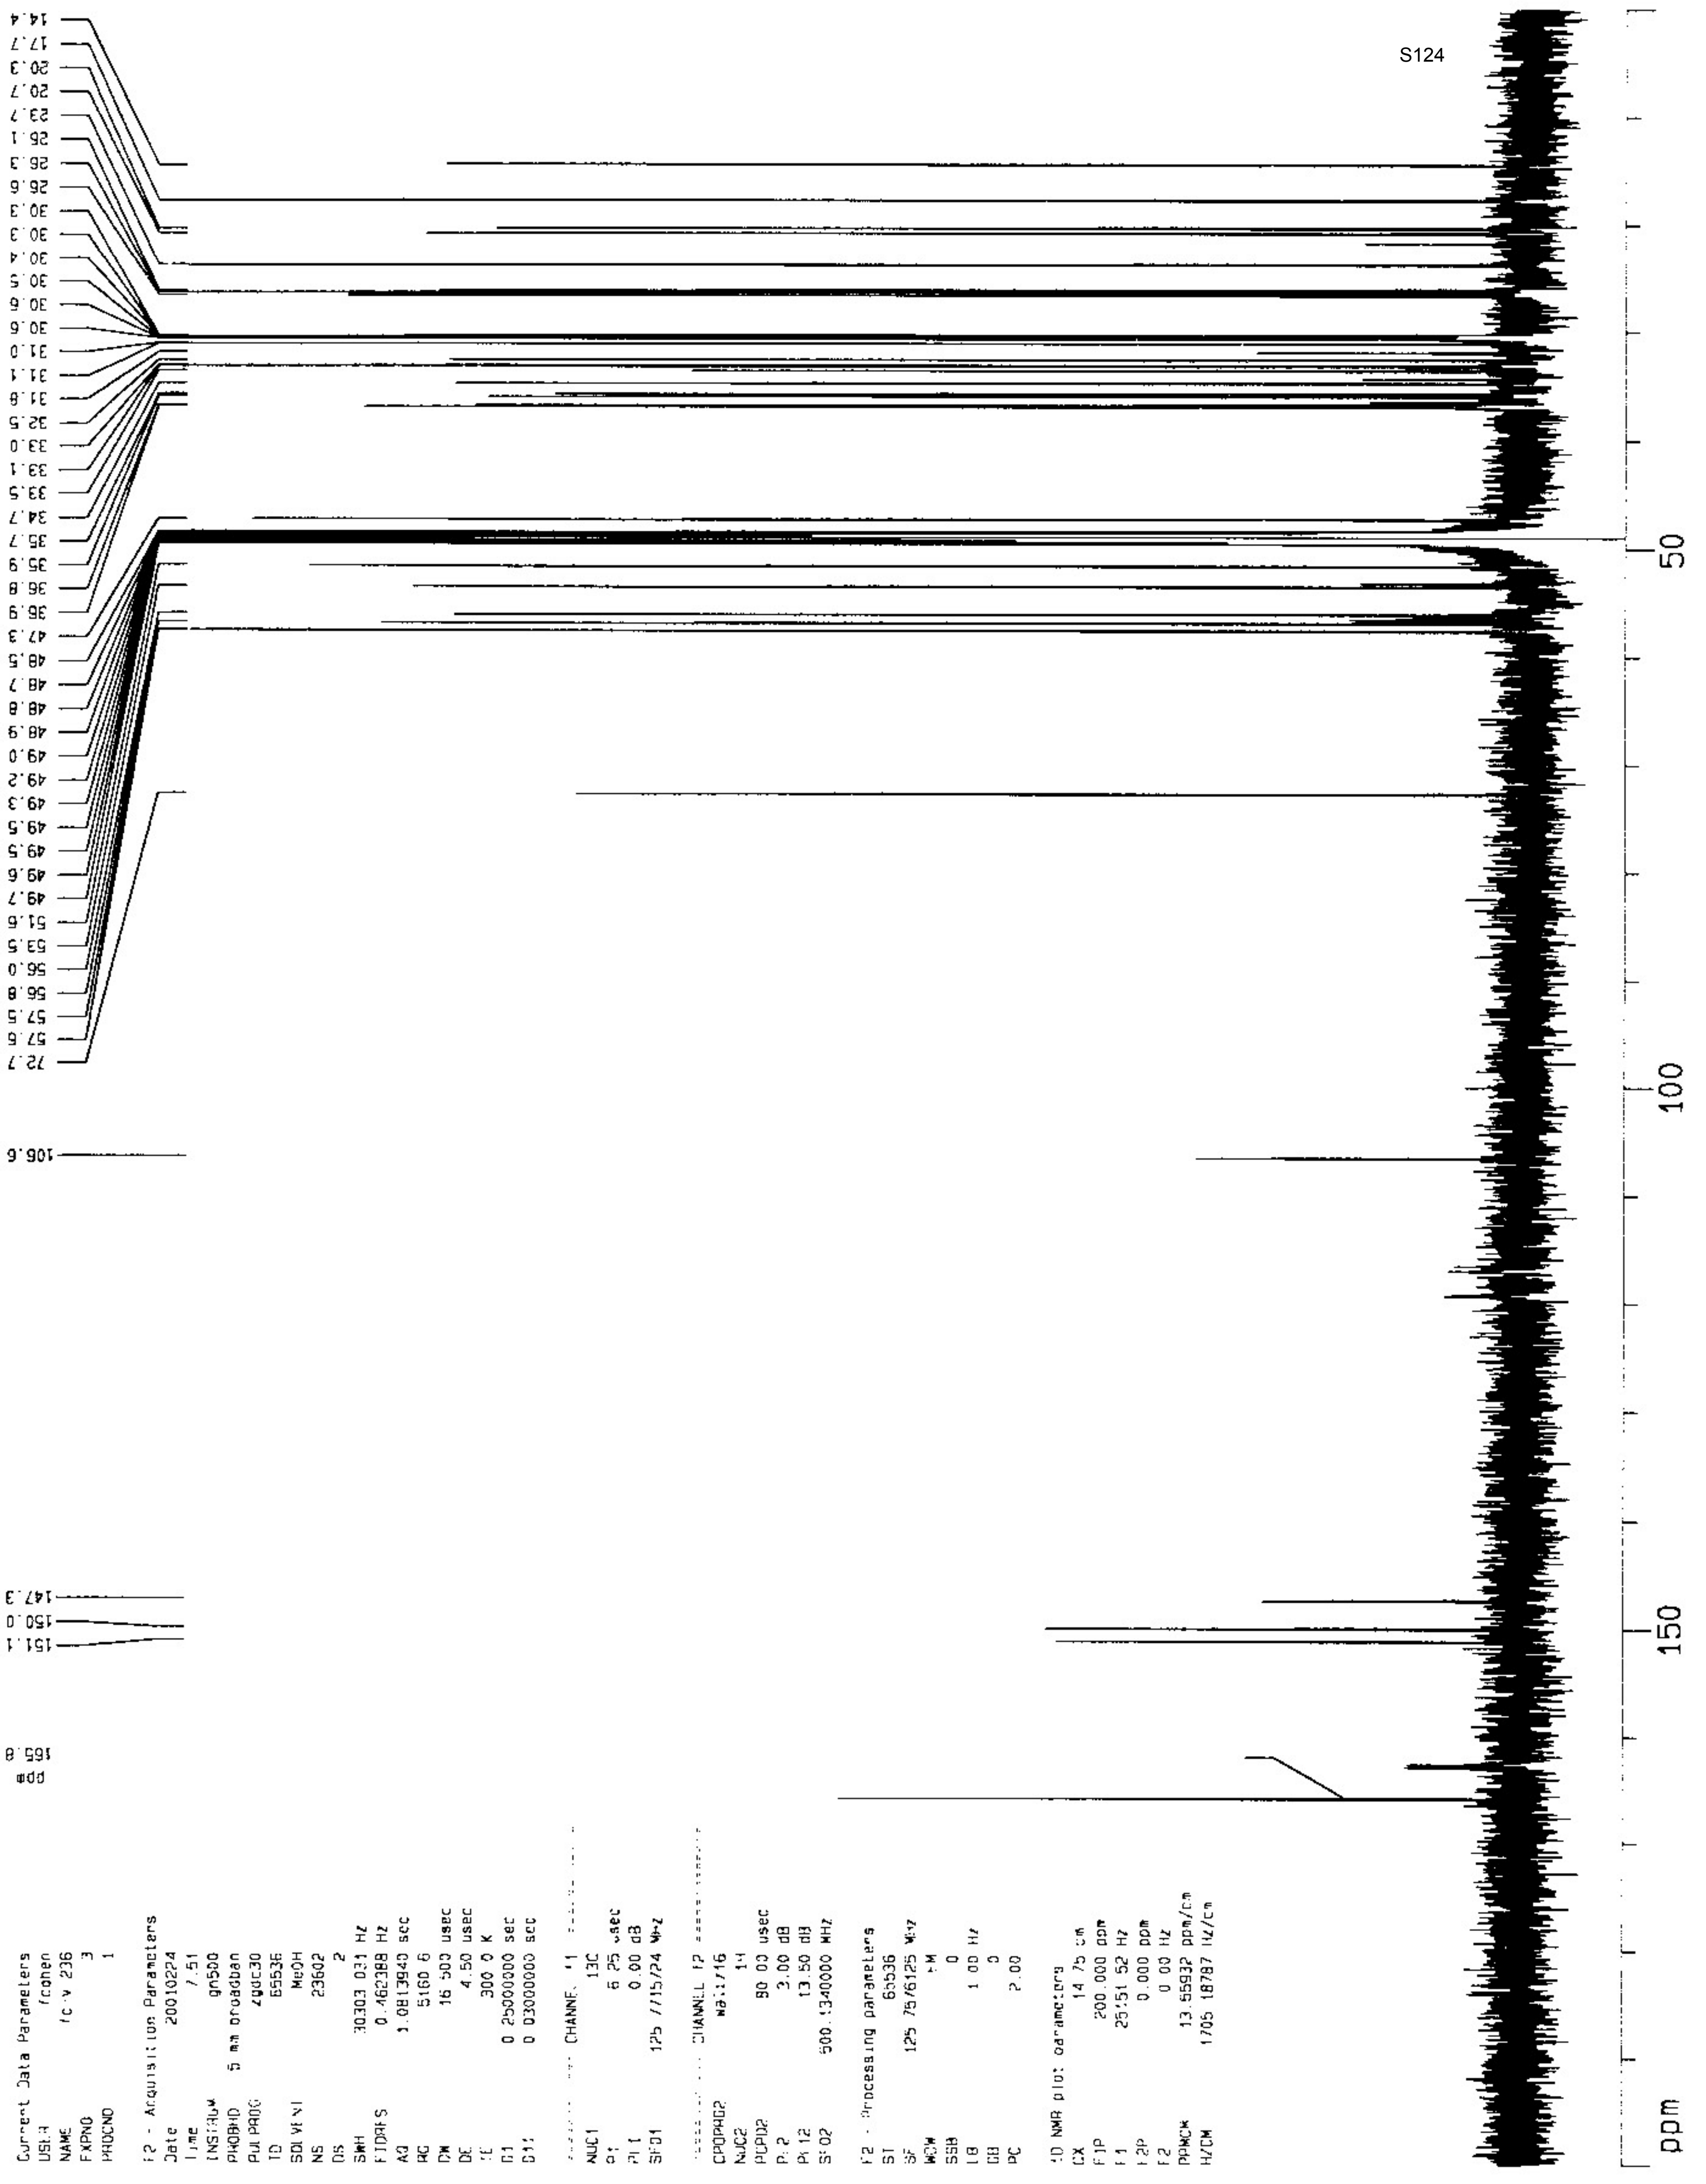

Current Data Parameters  
 USL:3  
 NAME fcv 236  
 EXPNO 3  
 PROCNO 1

F2 - Acquisition Parameters  
 Date 20010224  
 Time 7.51  
 INSTRUM gm500  
 PROBHD 5 mm broadband  
 PULPROG zgpg30  
 TD 65536  
 SOLVENT MeOH  
 NS 23602  
 DS 2  
 SWH 30303.031 Hz  
 FIDRES 0.462388 Hz  
 AQ 1.0813940 sec  
 RG 5160.6  
 DW 16.500 usec  
 DE 4.50 usec  
 TE 300.0 K  
 D1 0.25000000 sec  
 D11 0.03000000 sec

===== CHANNEL f1 =====  
 NUC1 13C  
 P1 6.25 usec  
 PL1 0.00 dB  
 SF01 125.775724 MHz

===== CHANNEL f2 =====  
 CPDPRG2 waltz16  
 NUC2 1H  
 PUPD2 80.00 usec  
 PL2 2.00 dB  
 PL12 13.50 dB  
 SF02 500.1340000 MHz

F2 - Processing parameters  
 SI 65536  
 SF 125.7576125 MHz  
 WDW EM  
 SSB 0  
 LB 1.00 Hz  
 GB 0  
 PC 2.00

F0 NMR pilot: oaramc.org  
 CX 14.75 cm  
 F1P 200.000 ppm  
 F1 25151.52 Hz  
 F2P 0.000 ppm  
 F2 0.00 Hz  
 PPMCK 13.55932 ppm/cm  
 HZCM 1705.18787 Hz/cm
